# Supplementary material
Source: PubMed Central journal article supplement (PMC11293623)
Supplement: NIHMS1957514-supplement-Supporting_information.pdf [file NIHMS1957514-supplement-Supporting_information.pdf]

## Supporting Information For:

# Asymmetric Catalytic Hydroboration of Enol Carbamates Enables an Enantioselective Matteson Homologation

Dmitry Kuznetsov, Joseph M. Ready\*

*Department of Biochemistry, UT Southwestern Medical Center, 5323 Harry Hines Blvd Dallas, TX 75390-8548  
United States*

### Supplemental Material

#### Table of Contents

|                                                                 |     |
|-----------------------------------------------------------------|-----|
| General Methods.....                                            | 2   |
| Synthesis of Substrates .....                                   | 3   |
| Optimization of Asymmetric Hydroboration.....                   | 188 |
| Scope of Asymmetric Hydroboration .....                         | 22  |
| Limitations of Asymmetric Hydroboration .....                   | 66  |
| Reactions of Hydroboration Products with Grignard Reagents..... | 67  |
| NMR Spectra .....                                               | 72  |
| References .....                                                | 216 |

## General Methods

All commercially available reagents were used as received unless otherwise stated.  $[\text{Rh}(\text{cod})_2]\text{OTf}$  (CAS No. 99326-34-8, Catalog No. 45-0110), ligand **L6b** (CAS No. 1221746-66-2, Catalog No. 26-1269) and 1,1'-bis(diisopropylphosphino)ferrocene (CAS No. 97239-80-0, Catalog No. 26-0275) were purchased from Strem Chemicals Inc. and stored in freezer under inert atmosphere. HBpin (CAS No. 25015-63-8, Catalog No. T2572) was purchased from TCI America, purified via distillation, and stored in a  $\text{N}_2$ -filled glovebox. All other reagents were purchased from various commercial sources (Sigma-Aldrich, Alfa Aesar, Matrix Scientific, Frontier Scientific, Combi-Blocks, TCI America, Oakwood Chemical). Deuterated solvents were purchased from Cambridge Isotope Laboratories, Inc. and Sigma-Aldrich. All reactions were conducted in oven- or flame-dried glassware under atmosphere of argon. Tetrahydrofuran (THF) and diethyl ether ( $\text{Et}_2\text{O}$ ) were purified by passing the degassed solvents through two activated alumina columns and were stored under inert atmosphere prior to use.

All NMR experiments were recorded on Bruker Ascend-600, Varian Inova-400 and Bruker Ascend-400 spectrometers. Data for  $^1\text{H}$  and  $^{13}\text{C}$  NMR spectra are reported as follows: chemical shift ( $\delta$ , ppm), integration, multiplicity (s = singlet, d = doublet, t = triplet, q = quartet, dd = doublet of doublets, ddd = doublet of doublets of doublets, dt = doublet of triplets, hept = heptet, m = multiplet), and coupling constant (Hz). The 7.26 resonance of residual  $\text{CHCl}_3$  for  $^1\text{H}$  spectra and the 77.23 ppm resonance of  $\text{CDCl}_3$  for  $^{13}\text{C}$  spectra were used as internal references. Silica gel flash chromatography purifications were performed using 40–63-micron flash silica gel purchased from Sorbtech Technologies. Reversed-phase flash chromatography was performed using Teledyne Isco RediSep Gold® C18 Reversed Phase columns on a Teledyne Isco CombiFlash® Rf 200 instrument. Thin layer chromatography (TLC) was performed on silica gel 60 F254 pre-coated glass plates (0.25 mm) purchased from E. Merck. Visualization of TLC plates was performed using ultraviolet light (254 nm) or  $\text{KMnO}_4$  stain and heat as developing agents. Enantiomeric excess was measured on a Shimadzu Prominence HPLC with the column and solvent system indicated with each characterized compound. Mass spectra were acquired on an Agilent technologies 1200 series LC/MS using indicated ionization methods.

# Synthesis of Substrates

## Synthesis of Julia Reagent

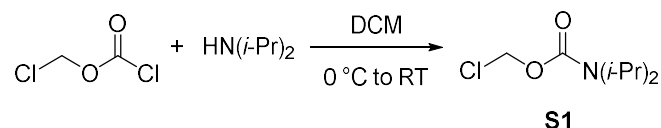

### Chloromethyl diisopropylcarbamate (S1).

At 0 °C and under argon, solution of diisopropylamine (10.0 mL, 7.22 g, 71.5 mmol, 2.50 equiv) in anhydrous DCM (10 mL) was added dropwise to a solution of chloromethyl chloroformate (2.50 mL, 3.68 g, 28.5 mmol, 1.00 equiv) in anhydrous DCM (40 mL). The mixture was stirred at ambient temperature overnight. The reaction was diluted with DCM (75 mL), and the resulting solution was washed with 1N HCl (15 mL), sat. aq. NaHCO<sub>3</sub> (15 mL) and water (15 mL), dried over Na<sub>2</sub>SO<sub>4</sub>, filtered and concentrated to afford 4.91 g (89%) of the title compound as a colorless oil. <sup>1</sup>H NMR (400 MHz, CDCl<sub>3</sub>) δ 5.82 (s, 2H), 4.06 (br s, 1H), 3.82 (br s, 1H), 1.24 (d, *J* = 6.8 Hz, 12H). Spectral data is consistent with previously reported results.<sup>1</sup>

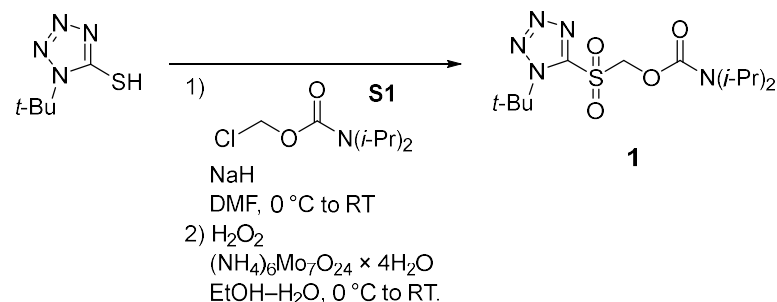

### ((1-(*tert*-Butyl)-1*H*-tetrazol-5-yl)sulfonyl)methyl diisopropylcarbamate (1).

**Step 1.** 1-(*tert*-Butyl)-1*H*-tetrazole-5-thiol<sup>2</sup> (2.00 g, 12.7 mmol, 1.00 equiv) was dissolved in anhydrous DMF (60 mL) under argon. At 0 °C, sodium hydride (0.556 g of 60% dispersion in mineral oil, 0.334 g, 13.9 mmol, 1.10 equiv) was added, and the mixture was stirred with ice bath cooling for 15 min. Then a solution of **S1** (2.62 g, 13.5 mmol, 1.06 equiv) in anhydrous DMF (2.5 mL) was added dropwise at 0 °C, and the mixture was stirred under argon at ambient temperature overnight. Sat. aq. NH<sub>4</sub>Cl (30 mL) was carefully added to quench the reaction, followed by water (10 mL). The product was extracted with EtOAc (3 × 60 mL). Combined organic layers were washed with water (5 × 50 mL) and brine (50 mL), dried over Na<sub>2</sub>SO<sub>4</sub>, filtered and concentrated. The resulting crude sulfide (pale-yellow oil that solidifies to form a beige solid) was used for the next step without further purification.

<sup>1</sup>H NMR (400 MHz, CDCl<sub>3</sub>) δ 5.94 (s, 2H), 4.06 (br hept, 1H), 3.72 (br hept, 1H), 1.71 (s, 9H), 1.21 (d, *J* = 6.6 Hz, 6H), 1.12 (d, *J* = 6.6 Hz, 6H). **Step 2.** At 0 °C, 30% aq. H<sub>2</sub>O<sub>2</sub> (21 mL) was added dropwise to a solution of the sulfide (12.7 mmol, 1.00 equiv) in abs. EtOH (60 mL), followed by ammonium heptamolybdate tetrahydrate (7.03 g, 5.69 mmol, 0.45 equiv), and the mixture was stirred at ambient temperature overnight. At 0 °C, sat. aq. Na<sub>2</sub>S<sub>2</sub>O<sub>3</sub> (30 mL) was carefully added to quench the reaction, and the mixture was filtered through a silica gel pad (80 mL of EtOAc was used for additional washing). The filtrate was concentrated under vacuum, and the product was extracted

from the resulting aqueous mixture with EtOAc ( $4 \times 70$  mL). Combined organic layers were washed with sat. aq.  $\text{Na}_2\text{S}_2\text{O}_3$  (30 mL) and brine (30 mL), dried over  $\text{Na}_2\text{SO}_4$ , filtered and concentrated. The residue was vacuum-dried at  $50^\circ\text{C}$  to afford 3.78 g (86% over two steps) of the Julia reagent **1** as a white solid which was used without further purification.

$^1\text{H NMR}$  (400 MHz,  $\text{CDCl}_3$ )  $\delta$  5.92 (s, 2H), 4.04 (hept,  $J = 6.8$  Hz, 1H), 3.75 (hept,  $J = 6.8$  Hz, 1H), 1.85 (s, 9H), 1.22 (d,  $J = 6.8$  Hz, 6H), 1.10 (d,  $J = 6.8$  Hz, 6H).

$^{13}\text{C NMR}$  (101 MHz,  $\text{CDCl}_3$ )  $\delta$  153.2, 152.3, 77.7, 65.5, 47.6, 46.2, 29.6, 21.1, 20.2.

ESI MS calcd for  $\text{C}_{13}\text{H}_{26}\text{N}_5\text{O}_4\text{S}^+$   $[\text{M}+\text{H}]^+$  348.17, found 348.1.

### General Procedure A for Julia olefination

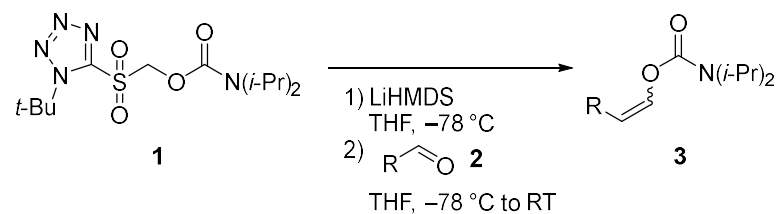

The following manipulations were carried out under argon. Sulfone **1** (0.631 g, 1.82 mmol, 1.50 equiv) was dissolved in anhydrous THF (12 mL), and the solution was cooled to  $-78^\circ\text{C}$ . LiHMDS (2.1 mL of 1.0 M in THF, 2.1 mmol, 1.7 equiv) was added dropwise, maintaining the temperature below  $-60^\circ\text{C}$ . The mixture was stirred with dry ice/acetone cooling for 40 min. Then a solution of aldehyde **2** (1.21 mmol, 1.00 equiv) in anhydrous THF (1.6 mL) was added dropwise, maintaining the temperature below  $-60^\circ\text{C}$ , and the mixture was stirred at ambient temperature overnight. Methanol (1 mL) was added to quench the reaction, and the volatiles were removed under vacuum. Subsequent flash chromatography afforded the desired enol carbamate **3**.

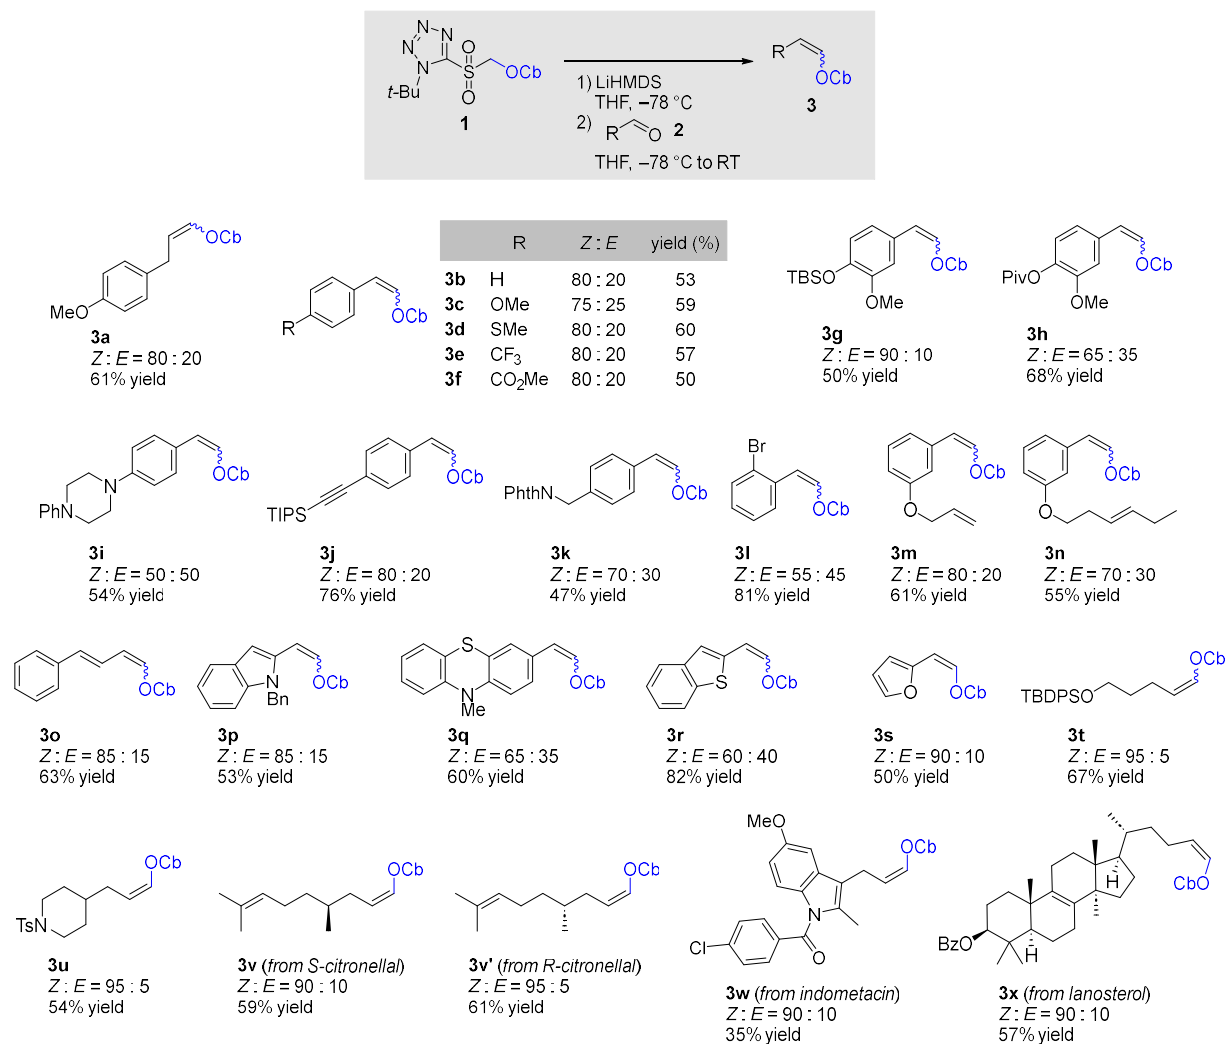

**Scheme S1.** Scope of Julia Olefination to Access Enol Carbamates. All reactions were run in THF (0.1 M) using Julia reagent **1** (1.5 equiv), LiHMDS (1.7 equiv) and aldehyde **2** (1.0 equiv). Yields are given for isolated products. Z : E ratios were determined by <sup>1</sup>H NMR.

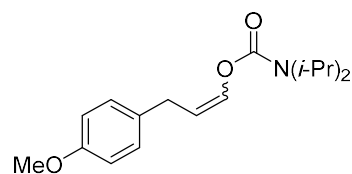

### 3-(4-Methoxyphenyl)prop-1-en-1-yl diisopropylcarbamate (**3a**).

General procedure A was followed on a 0.602 g (4.01 mmol) scale of 2-(4-methoxyphenyl)acetaldehyde **2a** (prepared by oxidation of 4-methoxyphenethyl alcohol with IBX according to the literature procedure<sup>3</sup>), which after flash chromatography on silica gel (eluting with hexanes/Et<sub>2</sub>O = 90:10) afforded 0.714 g (61%) of the product as a yellow oil (Z : E = 80 : 20).

**<sup>1</sup>H NMR** (400 MHz, CDCl<sub>3</sub>) δ 7.19 – 7.09 (m, 3H, *Z* + 3H, *E*), 6.89 – 6.79 (m, 2H, *Z* + 2H, *E*), 5.43 (dt, *J* = 12.4, 7.5 Hz, 1H, *E*), 4.91 (td, *J* = 7.5, 6.4 Hz, 1H, *Z*), 4.11 (br s, 1H, *Z* + 1H, *E*), 3.81 (br s, 1H, *Z* + 1H, *E*), 3.79 (s, 3H, *Z* + 3H, *E*), 3.46 (dd, *J* = 7.5, 1.7 Hz, 2H, *Z*), 3.27 (dd, *J* = 7.4, 1.7 Hz, 2H, *E*), 1.30 – 1.19 (br m, 12H, *Z* + 12H, *E*).

**<sup>13</sup>C NMR** (151 MHz, CDCl<sub>3</sub>) δ 158.05, 153.05, 137.26, 135.63, 132.65, 132.57, 129.48, 129.31, 113.97, 111.35, 109.82, 55.41, 46.98, 45.82, 33.02, 30.46, 21.70, 20.51.

**ESI MS** calcd for C<sub>17</sub>H<sub>26</sub>NO<sub>3</sub><sup>+</sup> [M+H]<sup>+</sup> 292.19, found 292.2.

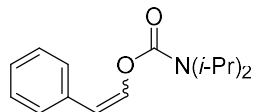

### Styryl diisopropylcarbamate (3b).

General procedure A was followed on a 0.123 g (1.16 mmol) scale of benzaldehyde **2b**, which after flash chromatography on silica gel (eluting with hexanes/EtOAc = 95:5) afforded 0.153 g (53%) of the product as a pale-yellow oil (*Z* : *E* = 80 : 20).

**<sup>1</sup>H NMR** (400 MHz, CDCl<sub>3</sub>) δ 7.85 (d, *J* = 12.8 Hz, 1H, *E*), 7.56 – 7.49 (m, 2H, *Z*), 7.37 – 7.15 (m, 4H, *Z* + 5H, *E*), 6.29 (d, *J* = 12.9 Hz, 1H, *E*), 5.63 (d, *J* = 7.3 Hz, 1H, *Z*), 4.27 (br s, 1H, *Z*), 4.08 (br s, 1H, *E*), 3.88 (br s, 1H, *E*), 3.78 (br s, 1H, *Z*), 1.39 – 1.21 (br m, 12H, *Z* + 12H, *E*).

**<sup>13</sup>C NMR** (151 MHz, CDCl<sub>3</sub>) δ 152.82, 151.80, 137.83, 135.55, 135.13, 134.81, 128.76, 128.37, 126.87, 126.83, 126.00, 112.57, 109.55, 62.59, 47.19, 46.98, 46.17, 46.04, 21.79, 21.13, 20.61.

**ESI MS** calcd for C<sub>15</sub>H<sub>22</sub>NO<sub>2</sub><sup>+</sup> [M+H]<sup>+</sup> 248.16, found 248.1.

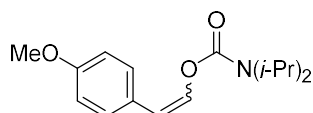

### 4-Methoxystyryl diisopropylcarbamate (3c).

General procedure A was followed on a 0.150 g (1.10 mmol) scale of 4-methoxybenzaldehyde **2c**, which after flash chromatography on silica gel (eluting with hexanes/Et<sub>2</sub>O = 90:10) afforded 0.180 g (59%) of the product as a white solid (*Z* : *E* = 75 : 25).

**<sup>1</sup>H NMR** (400 MHz, CDCl<sub>3</sub>) δ 7.73 (d, *J* = 12.8 Hz, 1H, *E*), 7.51 – 7.43 (m, 2H, *Z*), 7.28 – 7.21 (m, 2H, *E*), 7.16 (d, *J* = 7.3 Hz, 1H, *Z*), 6.91 – 6.83 (m, 2H, *Z*), 6.86 – 6.80 (m, 2H, *E*), 6.25 (d, *J* = 12.8 Hz, 1H, *E*), 5.57 (d, *J* = 7.3 Hz, 1H, *Z*), 4.27 (br s, 1H, *Z*), 4.08 (br s, 1H, *E*), 3.87 (br s, 1H, *E*), 3.82 (s, 3H, *Z*), 3.80 (s, 3H, *E*), 3.77 (br s, 1H, *Z*), 1.41 – 1.17 (br m, 12H, *Z* + 12H, *E*).

**<sup>13</sup>C NMR** (151 MHz, CDCl<sub>3</sub>) δ 158.71, 158.42, 136.43, 134.17, 129.97, 127.62, 127.51, 127.12, 114.23, 113.78, 112.22, 109.16, 55.42, 55.40, 47.15, 46.12, 21.15, 20.64.

**ESI MS** calcd for C<sub>16</sub>H<sub>24</sub>NO<sub>3</sub><sup>+</sup> [M+H]<sup>+</sup> 278.18, found 278.2.

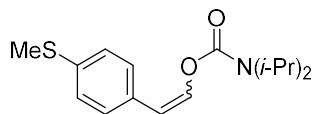

#### 4-(Methylthio)styryl diisopropylcarbamate (3d).

General procedure A was followed on a 0.200 g (1.32 mmol) scale of 4-(methylthio)benzaldehyde **2d**, which after flash chromatography on silica gel (eluting with hexanes/Et<sub>2</sub>O = 90:10) afforded 0.232 g (60%) of the product as a yellow solid (*Z* : *E* = 80 : 20).

<sup>1</sup>H NMR (400 MHz, CDCl<sub>3</sub>) δ 7.82 (d, *J* = 12.9 Hz, 1H, *E*), 7.49 – 7.41 (m, 2H, *Z*), 7.25 – 7.15 (m, 3H, *Z* + 4H, *E*), 6.25 (d, *J* = 12.8 Hz, 1H, *E*), 5.57 (d, *J* = 7.3 Hz, 1H, *Z*), 4.26 (br s, 1H, *Z*), 4.08 (br s, 1H, *E*), 3.87 (br s, 1H, *E*), 3.77 (br s, 1H, *Z*), 2.49 (s, 3H, *Z*), 2.48 (s, 3H, *E*), 1.42 – 1.16 (br m, 12H, *Z* + 12H, *E*).

<sup>13</sup>C NMR (151 MHz, CDCl<sub>3</sub>) δ 151.73, 137.55, 136.81, 136.72, 135.37, 132.12, 131.76, 129.14, 127.09, 126.50, 126.40, 112.06, 108.98, 47.24, 46.19, 21.16, 20.61, 16.14, 15.99.

ESI MS calcd for C<sub>16</sub>H<sub>24</sub>NO<sub>2</sub>S<sup>+</sup> [M+H]<sup>+</sup> 294.15, found 294.1.

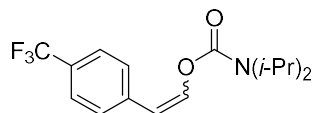

#### 4-(Trifluoromethyl)styryl diisopropylcarbamate (3e).

General procedure A was followed on a 0.200 g (1.15 mmol) scale of 4-(trifluoromethyl)benzaldehyde **2e**, which after flash chromatography on silica gel (eluting with hexanes/DCM = 50:50) afforded 0.206 g (57%) of the product as a yellow solid (*Z* : *E* = 80 : 20).

<sup>1</sup>H NMR (400 MHz, CDCl<sub>3</sub>) δ 7.94 (d, *J* = 12.9 Hz, 1H, *E*), 7.66 – 7.60 (m, 2H, *Z*), 7.59 – 7.55 (m, 2H, *Z*), 7.57 – 7.50 (m, 2H, *E*), 7.44 – 7.37 (m, 2H, *E*), 7.34 (d, *J* = 7.3 Hz, 1H, *Z*), 6.30 (d, *J* = 12.9 Hz, 1H, *E*), 5.65 (d, *J* = 7.4 Hz, 1H, *Z*), 4.24 (br s, 1H, *Z*), 4.08 (br s, 1H, *E*), 3.90 (br s, 1H, *E*), 3.78 (br s, 1H, *Z*), 1.43 – 1.16 (br m, 12H, *Z* + 12H, *E*).

<sup>13</sup>C NMR (151 MHz, CDCl<sub>3</sub>) δ 151.52, 139.60, 138.42, 137.35, 128.79, 128.45, 126.01, 125.73 (q, *J* = 3.9 Hz), 125.30 (q, *J* = 3.9 Hz), 123.45, 111.29, 108.17, 47.33, 46.36, 32.08, 30.07, 29.86, 21.79, 21.15, 20.57.

<sup>19</sup>F NMR (376 MHz, CDCl<sub>3</sub>) δ -62.47.

ESI MS calcd for C<sub>16</sub>H<sub>21</sub>F<sub>3</sub>NO<sub>2</sub><sup>+</sup> [M+H]<sup>+</sup> 316.15, found 316.1.

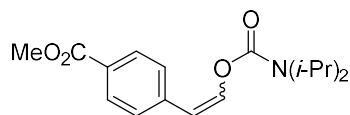

#### Methyl 4-(2-((diisopropylcarbamoyl)oxy)vinyl)benzoate (3f).

General procedure A was followed on a 0.202 g (1.23 mmol) scale of methyl 4-formylbenzoate **2f**, which after flash chromatography on silica gel (eluting with hexanes/Et<sub>2</sub>O = 90:10) afforded 0.189 g (50%) of the product as a white solid (*Z* : *E* = 80 : 20).

<sup>1</sup>H NMR (600 MHz, CDCl<sub>3</sub>) δ 8.01 – 7.97 (m, 2H, *Z*), 7.96 (d, *J* = 12.9 Hz, 1H, *E*), 7.96 (m, 2H, *E*), 7.61 – 7.56 (m,

2H, *Z*), 7.39 – 7.35 (m, 2H, *E*), 7.35 (d, *J* = 7.3 Hz, 1H, *Z*), 6.31 (d, *J* = 12.9 Hz, 1H, *E*), 5.66 (d, *J* = 7.3 Hz, 1H, *Z*), 4.27 (br s, 1H, *Z*), 4.08 (br s, 1H, *E*), 3.92 (s, 3H, *Z*), 3.90 (s, 3H, *E*), 3.90 (br s, 1H, *E*), 3.78 (br s, 1H, *Z*), 1.41 – 1.20 (br m, 12H, *Z* + br m, 12H, *E*).

<sup>13</sup>C NMR (151 MHz, CDCl<sub>3</sub>) δ 167.09, 151.40, 140.12, 139.73, 139.56, 137.36, 130.15, 129.72, 128.55, 128.13, 125.73, 111.71, 108.58, 52.23, 52.18, 47.37, 46.30, 21.81, 21.14, 20.57.

ESI MS calcd for C<sub>17</sub>H<sub>24</sub>NO<sub>4</sub><sup>+</sup> [M+H]<sup>+</sup> 306.17, found 306.1.

The *Z* and *E* isomers of **3f** were separated by flash chromatography on silica gel (eluting with DCM).

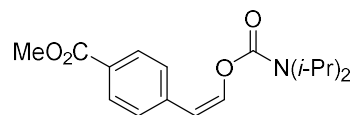

**Methyl (*Z*)-4-(2-((diisopropylcarbamoyl)oxy)vinyl)benzoate (**3f-Z**).**

<sup>1</sup>H NMR (400 MHz, CDCl<sub>3</sub>) δ 8.03 – 7.95 (m, 2H, *Z*), 7.62 – 7.55 (m, 2H, *Z*), 7.35 (d, *J* = 7.3 Hz, 1H, *Z*), 5.66 (d, *J* = 7.4 Hz, 1H, *Z*), 4.27 (br s, 1H, *Z*), 3.92 (s, 3H, *Z*), 3.78 (br s, 1H, *Z*), 1.38 – 1.31 (br m, 6H, *Z*), 1.30 – 1.25 (br m, 6H, *Z*).

<sup>13</sup>C NMR (151 MHz, CDCl<sub>3</sub>) δ 167.09, 151.40, 139.56, 137.37, 129.72, 128.55, 128.13, 108.58, 52.23, 47.36, 46.30, 21.14, 20.57.

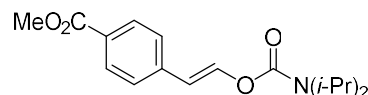

**Methyl (*E*)-4-(2-((diisopropylcarbamoyl)oxy)vinyl)benzoate (**3f-E**).**

<sup>1</sup>H NMR (400 MHz, CDCl<sub>3</sub>) δ 7.97 – 7.94 (m, 2H, *E*), 7.96 (d, *J* = 13.1 Hz, 1H, *E*), 7.40 – 7.32 (m, 2H, *E*), 6.31 (d, *J* = 12.8 Hz, 1H, *E*), 4.08 (br s, 1H, *E*), 3.92 (br s, 1H, *E*), 3.90 (s, 3H, *E*), 1.28 (br d, *J* = 6.5 Hz, 12H, *E*).

<sup>13</sup>C NMR (151 MHz, CDCl<sub>3</sub>) δ 167.06, 152.48, 140.12, 139.73, 130.15, 128.32, 125.73, 111.71, 52.18, 47.13, 46.18, 21.78, 20.49.

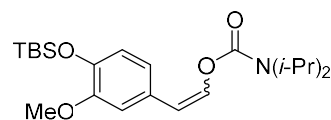

**4-((*tert*-Butyldimethylsilyl)oxy)-3-methoxystyryl diisopropylcarbamate (**3g**).**

General procedure A was followed on a 0.300 g (1.04 mmol) scale of TBS-protected vanillin **2g** (prepared from vanillin according to the literature procedure<sup>4</sup>), which after flash chromatography on silica gel (eluting with hexanes/Et<sub>2</sub>O = 90:10) afforded 0.212 g (50%) of the product as a colorless oil (*Z* : *E* = 90 : 10).

<sup>1</sup>H NMR (400 MHz, CDCl<sub>3</sub>) δ 7.73 (d, *J* = 12.8 Hz, 1H, *E*), 7.17 (d, *J* = 7.4 Hz, 1H, *Z*), 7.06 (d, *J* = 2.0 Hz, 1H, *Z*), 6.98 (dd, *J* = 8.2, 2.0 Hz, 1H, *Z*), 6.83 (d, *J* = 1.8 Hz, 1H, *E*), 6.80 (d, *J* = 8.2 Hz, 1H, *Z*), 6.77 (d, *J* = 8.4 Hz, 1H, *E*), 6.74 (dd, *J* = 8.3, 1.8 Hz, 1H, *E*), 6.24 (d, *J* = 12.8 Hz, 1H, *E*), 5.54 (d, *J* = 7.4 Hz, 1H, *Z*), 4.34 (br s, 1H, *Z*), 4.08 (br s, 1H, *E*), 3.87 (br s, 1H, *E*), 3.80 (s, 3H, *Z*), 3.79 (s, 3H, *E*), 3.73 (br s, 1H, *Z*), 1.45 – 1.10 (br m, 12H, *Z* + 12H, *E*), 0.99 (s, 9H, *Z*), 0.99 (s, 9H, *E*), 0.15 (s, 6H, *Z*), 0.15 (s, 6H, *E*).

<sup>13</sup>C NMR (101 MHz, CDCl<sub>3</sub>) δ 151.74, 151.13, 150.70, 144.18, 136.56, 134.22, 128.66, 121.88, 121.09, 120.83,



119.25, 112.76, 112.70, 109.46, 109.11, 55.54, 47.18, 46.03, 25.85, 21.10, 18.58, -4.52.

**ESI MS** calcd for  $C_{22}H_{38}NO_4Si^+$   $[M+H]^+$  408.26, found 408.2.

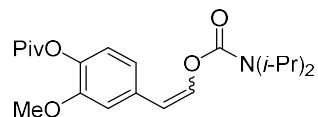

#### 4-(2-((Diisopropylcarbamoyl)oxy)vinyl)-2-methoxyphenyl pivalate (**3h**).

General procedure A was followed on a 0.300 g (1.27 mmol) scale of pivaloyl-protected vanillin **2h** (prepared from vanillin according to the literature procedure<sup>5</sup>), which after flash chromatography on C18 silica gel (gradient elution: water–acetonitrile 90:10 → acetonitrile) afforded 0.325 g (68%) of the product as a yellow oil (*Z* : *E* = 65 : 35).

**<sup>1</sup>H NMR** (400 MHz,  $CDCl_3$ )  $\delta$  7.81 (d, *J* = 12.8 Hz, 1H, *E*), 7.25 (d, *J* = 7.5 Hz, 1H, *Z*), 7.14 – 7.07 (m, 2H, *Z*), 6.95 (d, *J* = 8.0 Hz, 1H, *Z*), 6.93 – 6.88 (m, 2H, *E*), 6.85 (dd, *J* = 8.2, 1.8 Hz, 1H, *E*), 6.27 (d, *J* = 12.8 Hz, 1H, *E*), 5.57 (d, *J* = 7.4 Hz, 1H, *Z*), 4.33 (br s, 1H, *Z*), 4.06 (br s, 1H, *E*), 3.90 (br s, 1H, *E*), 3.80 (s, 3H, *Z* + 3H, *E*), 3.73 (br s, 1H, *Z*), 1.36 (s, 9H, *Z* + 9H, *E*), 1.31 – 1.16 (br m, 12H, *Z* + 12H, *E*).

**<sup>13</sup>C NMR** (151 MHz,  $CDCl_3$ )  $\delta$  176.89, 152.75, 151.53, 151.36, 151.01, 139.24, 139.06, 137.78, 135.42, 133.81, 133.48, 122.91, 122.57, 121.49, 118.91, 112.87, 112.24, 109.39, 108.93, 56.03, 56.00, 47.27, 46.99, 46.11, 39.21, 39.19, 27.36, 21.76, 21.15, 20.55, 20.51.

**ESI MS** calcd for  $C_{21}H_{32}NO_5^+$   $[M+H]^+$  378.23, found 378.2.

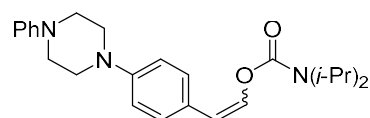

#### 4-(4-Phenylpiperazin-1-yl)styryl diisopropylcarbamate (**3i**).

General procedure A was followed on a 0.200 g (0.750 mmol) scale of 4-(4-phenylpiperazin-1-yl)benzaldehyde **2i** (prepared from 4-fluorobenzaldehyde and 1-phenylpiperazine according to the literature procedure<sup>6</sup>), which after flash chromatography on C18 silica gel (gradient elution: water–acetonitrile 90:10 → acetonitrile) afforded 0.164 g (54%) of the product as a pink solid (*Z* : *E* = 50 : 50).

**<sup>1</sup>H NMR** (400 MHz,  $CDCl_3$ )  $\delta$  7.75 (d, *J* = 12.8 Hz, 1H, *E*), 7.54 – 7.44 (m, 2H, *Z*), 7.36 – 7.22 (m, 3H, *Z* + 3H, *E*), 7.16 (d, *J* = 7.3 Hz, 1H, *E*), 7.03 – 6.86 (m, 5H, *Z* + 5H, *E*), 6.25 (d, *J* = 12.8 Hz, 1H, *E*), 5.56 (d, *J* = 7.3 Hz, 1H, *Z*), 4.30 (br s, 1H, *Z*), 4.08 (br s, 1H, *E*), 3.89 (br s, 1H, *E*), 3.77 (br s, 1H, *Z*), 3.41 – 3.28 (m, 8H, *Z* + 8H, *E*), 1.48 – 1.07 (br m, 12H, *Z* + 12H, *E*).

**<sup>13</sup>C NMR** (151 MHz,  $CDCl_3$ )  $\delta$  153.02, 151.94, 151.34, 150.13, 149.85, 136.21, 133.96, 129.71, 129.34, 129.32, 126.89, 126.75, 126.60, 120.28, 120.22, 116.51, 116.49, 115.92, 112.31, 109.26, 49.50, 49.40, 49.28, 47.18, 46.89, 46.03, 21.78, 21.17, 20.63, 20.55.

**ESI MS** calcd for  $C_{25}H_{34}N_3O_2^+$   $[M+H]^+$  408.26, found 408.2.

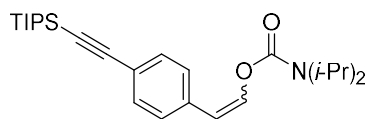

#### 4-((Triisopropylsilyl)ethynyl)styryl diisopropylcarbamate (3j).

General procedure A was followed on a 0.304 g (1.06 mmol) scale of 4-((triisopropylsilyl)ethynyl)benzaldehyde **2j** (prepared from 4-bromobenzaldehyde and ethynyltriisopropylsilane according to the literature procedure<sup>7</sup>), which after flash chromatography on silica gel (eluting with hexanes/Et<sub>2</sub>O = 90:10) afforded 0.346 g (76%) of the product as a dark-orange oil (*Z* : *E* = 80 : 20).

<sup>1</sup>H NMR (400 MHz, CDCl<sub>3</sub>) δ 7.87 (d, *J* = 12.8 Hz, 1H, *E*), 7.48 – 7.41 (m, 4H, *Z*), 7.43 – 7.36 (m, 2H, *E*), 7.28 – 7.21 (m, 2H, *E*), 7.27 (d, *J* = 7.3 Hz, 1H, *Z*), 6.26 (d, *J* = 12.8 Hz, 1H, *E*), 5.59 (d, *J* = 7.3 Hz, 1H, *Z*), 4.26 (br s, 1H, *Z*), 4.06 (br s, 1H, *E*), 3.90 (br s, 1H, *E*), 3.77 (br s, 1H, *Z*), 1.39 – 1.21 (br m, 15H, *Z* + 15H, *E*), 1.13 (s, 18H, *Z*), 1.12 (s, 18H, *E*).

<sup>13</sup>C NMR (151 MHz, CDCl<sub>3</sub>) δ 152.63, 151.56, 138.52, 136.17, 135.29, 134.90, 132.46, 132.05, 128.46, 125.67, 121.80, 121.71, 112.10, 108.94, 107.29, 107.27, 91.00, 47.29, 46.20, 21.13, 20.58, 18.82, 18.78, 11.46.

ESI MS calcd for C<sub>26</sub>H<sub>42</sub>NO<sub>2</sub>Si<sup>+</sup> [M+H]<sup>+</sup> 428.30, found 428.3.

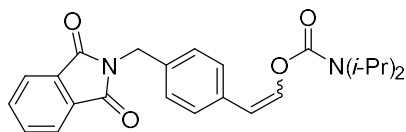

#### 4-((1,3-Dioxoisindolin-2-yl)methyl)styryl diisopropylcarbamate (3k).

General procedure A was followed on a 0.238 g (0.896 mmol) scale of 4-((1,3-dioxoisindolin-2-yl)methyl)benzaldehyde **2k** (prepared from 4-(bromomethyl)benzaldehyde and potassium phthalimide according to the literature procedure<sup>8</sup>), which after flash chromatography on C18 silica gel (gradient elution: water–acetonitrile 90:10 → acetonitrile) afforded 0.170 g (47%) of the product as an off-white solid (*Z* : *E* = 70 : 30).

<sup>1</sup>H NMR (400 MHz, CDCl<sub>3</sub>) δ 7.90 – 7.84 (m, 2H, *E*), 7.85 – 7.82 (m, 2H, *Z*), 7.81 (d, *J* = 12.8 Hz, 1H, *E*), 7.79 – 7.72 (m, 2H, *E*), 7.72 – 7.68 (m, 2H, *Z*), 7.50 – 7.45 (m, 2H, *Z*), 7.42 – 7.37 (m, 2H, *Z*), 7.39 – 7.32 (m, 2H, *E*), 7.29 – 7.22 (m, 2H, *E*), 7.22 (d, *J* = 7.3 Hz, 1H, *Z*), 6.24 (d, *J* = 12.8 Hz, 1H, *E*), 5.56 (d, *J* = 7.4 Hz, 1H, *Z*), 4.82 (s, 2H, *Z*), 4.81 (s, 2H, *E*), 4.26 (br s, 1H, *Z*), 4.06 (br s, 1H, *E*), 3.88 (br s, 1H, *E*), 3.75 (br s, 1H, *Z*), 1.32 (br s, 12H, *E*), 1.26 (br d, *J* = 6.8 Hz, 12H, *Z*).

<sup>13</sup>C NMR (151 MHz, CDCl<sub>3</sub>) δ 168.20, 167.94, 152.71, 151.63, 138.01, 135.74, 134.87, 134.79, 134.78, 134.47, 134.45, 134.14, 134.11, 132.75, 132.25, 132.24, 129.12, 128.97, 128.84, 126.22, 123.73, 123.48, 112.06, 108.94, 47.28, 46.10, 41.50, 41.44, 21.75, 21.11, 20.58, 20.49.

ESI MS calcd for C<sub>24</sub>H<sub>27</sub>N<sub>2</sub>O<sub>4</sub><sup>+</sup> [M+H]<sup>+</sup> 407.20, found 407.1.

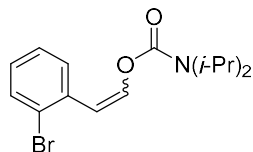

### 2-Bromostyryl diisopropylcarbamate (3l).

General procedure A was followed on a 0.224 g (1.21 mmol) scale of 2-bromobenzaldehyde **2l**, which after flash chromatography on silica gel (eluting with hexanes/Et<sub>2</sub>O = 90:10) afforded 0.321 g (81%) of the product as a pale-yellow oil (*Z* : *E* = 55 : 45).

<sup>1</sup>H NMR (400 MHz, CDCl<sub>3</sub>) δ 7.80 (d, *J* = 12.8 Hz, 1H, *E*), 7.74 (dd, *J* = 7.8, 1.7 Hz, 1H, *Z*), 7.57 (dd, *J* = 8.0, 1.3 Hz, 1H, *E*), 7.54 (dd, *J* = 8.0, 1.3 Hz, 1H, *E*), 7.48 (dd, *J* = 7.8, 1.7 Hz, 1H, *Z*), 7.36 (d, *J* = 7.3 Hz, 1H, *Z*), 7.26 (dd, *J* = 7.9, 1.3 Hz, 1H, *Z*), 7.23 (dd, *J* = 7.9, 1.3 Hz, 1H, *Z*), 7.11 – 7.04 (m, 2H, *E*), 6.61 (d, *J* = 12.7 Hz, 1H, *E*), 5.91 (d, *J* = 7.3 Hz, 1H, *Z*), 4.10 – 3.76 (br m, 2H, *Z* + 2H, *E*), 1.37 – 1.07 (br m, 12H, *Z* + 12H, *E*).

<sup>13</sup>C NMR (151 MHz, CDCl<sub>3</sub>) δ 152.47, 151.81, 139.44, 136.81, 135.13, 134.62, 133.07, 132.79, 130.83, 128.33, 128.30, 127.67, 126.92, 126.60, 123.67, 123.37, 111.62, 108.47, 46.92, 46.78, 46.51, 46.27, 21.73, 21.21, 20.51.

ESI MS calcd for C<sub>15</sub>H<sub>21</sub>BrNO<sub>2</sub><sup>+</sup> [M+H]<sup>+</sup> 326.08, found 326.1.

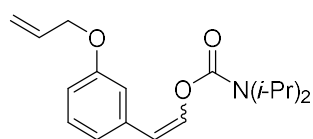

### 3-(Allyloxy)styryl diisopropylcarbamate (3m).

General procedure A was followed on a 0.259 g (1.60 mmol) scale of 3-(allyloxy)benzaldehyde **2m** (prepared from 3-hydroxybenzaldehyde according to the literature procedure<sup>9</sup>), which after flash chromatography on silica gel (eluting with hexanes/Et<sub>2</sub>O = 90:10) afforded 0.294 g (61%) of the product as a yellow oil (*Z* : *E* = 80 : 20).

<sup>1</sup>H NMR (400 MHz, CDCl<sub>3</sub>) δ 7.84 (d, *J* = 12.8 Hz, 1H, *E*), 7.25 (d, *J* = 7.6 Hz, 1H, *Z*), 7.23 (t, *J* = 7.9 Hz, 1H, *Z*), 7.19 (t, *J* = 8.0 Hz, 1H, *E*), 7.14 (dd, *J* = 2.6, 1.6 Hz, 1H, *Z*), 7.10 (dt, *J* = 7.6, 1.3 Hz, 1H, *Z*), 6.91 (dt, *J* = 7.6, 1.3 Hz, 1H, *E*), 6.87 (t, *J* = 2.0 Hz, 1H, *E*), 6.79 (ddd, *J* = 8.3, 2.6, 1.1 Hz, 1H, *Z*), 6.77 (ddd, *J* = 8.1, 2.6, 1.0 Hz, 1H, *E*), 6.26 (d, *J* = 12.8 Hz, 1H, *E*), 6.06 (ddt, *J* = 17.1, 10.5, 5.2 Hz, 1H, *Z*), 5.59 (d, *J* = 7.3 Hz, 1H, *Z* + 1H, *E*), 5.41 (dq, *J* = 17.3, 1.7 Hz, 1H, *Z* + 1H, *E*), 5.28 (ddq, *J* = 10.5, 2.9, 1.5 Hz, 1H, *Z* + 1H, *E*), 4.53 (dq, *J* = 5.2, 1.9 Hz, 2H, *Z* + 2H, *E*), 4.33 (br s, 1H, *Z*), 4.07 (br s, 1H, *E*), 3.89 (br s, 1H, *E*), 3.74 (br s, 1H, *Z*), 1.47 – 1.11 (br m, 12H, *Z* + 12H, *E*).

<sup>13</sup>C NMR (151 MHz, CDCl<sub>3</sub>) δ 158.93, 158.65, 152.73, 151.59, 138.04, 136.53, 136.09, 135.68, 133.39, 133.38, 129.70, 129.27, 121.62, 118.86, 117.74, 117.55, 115.14, 113.49, 113.25, 112.46, 111.93, 109.32, 68.84, 68.80, 47.29, 47.10, 46.05, 21.75, 21.11, 20.58, 20.49.

ESI MS calcd for C<sub>18</sub>H<sub>26</sub>NO<sub>3</sub><sup>+</sup> [M+H]<sup>+</sup> 304.19, found 304.4.

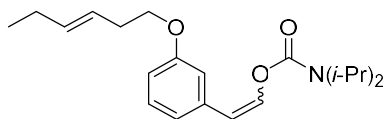

### 3-(((*E*)-Hex-3-en-1-yl)oxy)styryl diisopropylcarbamate (**3n**).

General procedure A was followed on a 0.249 g (1.22 mmol) scale of (*E*)-3-(hex-3-en-1-yloxy)benzaldehyde **2n** (prepared from 3-hydroxybenzaldehyde and (*E*)-hex-3-en-1-ol according to the literature procedure<sup>10</sup>), which after flash chromatography on silica gel (eluting with hexanes/Et<sub>2</sub>O = 90:10) afforded 0.558 g (55%) of the product as a colorless oil (*Z* : *E* = 70 : 30).

<sup>1</sup>H NMR (400 MHz, CDCl<sub>3</sub>) δ 7.84 (d, *J* = 12.8 Hz, 1H, *E*), 7.25 (d, *J* = 7.4 Hz, 1H, *Z*), 7.18 (t, *J* = 7.9 Hz, 1H, *E*), 7.22 (t, *J* = 8.0 Hz, 1H, *Z*), 7.14 (dd, *J* = 2.6, 1.6 Hz, 1H, *Z*), 7.06 (dt, *J* = 7.7, 1.3 Hz, 1H, *Z*), 6.89 (dt, *J* = 7.7, 1.3 Hz, 1H, *E*), 6.86 (dd, *J* = 2.4, 1.7 Hz, 1H, *E*), 6.77 (ddd, *J* = 8.4, 2.6, 1.1 Hz, 1H, *Z*), 6.74 (ddd, *J* = 8.2, 2.5, 1.0 Hz, 1H, *E*), 6.25 (d, *J* = 12.8 Hz, 1H, *E*), 5.67 – 5.55 (m, 1H, *Z* + 1H, *E*), 5.58 (d, *J* = 7.5 Hz, 1H, *Z*), 5.54 – 5.41 (m, 1H, *Z* + 1H, *E*), 4.34 (br s, 1H, *Z*), 4.07 (br s, 1H, *E*), 3.95 (t, *J* = 6.9 Hz, 2H, *E*), 3.95 (t, *J* = 6.9 Hz, 2H, *Z*), 3.89 (br s, 1H, *E*), 3.73 (br s, 1H, *Z*), 2.47 (qq, *J* = 6.7, 1.2 Hz, 2H, *Z* + 2H, *E*), 2.12 – 1.97 (m, 2H, *Z* + 2H, *E*), 1.48 – 1.15 (br m, 12H, *Z* + 12H, *E*), 0.99 (t, *J* = 7.5 Hz, 3H, *E*), 0.98 (t, *J* = 7.5 Hz, 3H, *Z*).

<sup>13</sup>C NMR (151 MHz, CDCl<sub>3</sub>) δ 159.34, 159.07, 152.78, 151.60, 138.00, 136.48, 136.04, 135.59, 135.01, 129.68, 129.25, 124.59, 124.50, 121.43, 118.70, 114.85, 113.43, 113.21, 112.54, 111.67, 109.40, 67.92, 67.89, 47.32, 47.04, 46.05, 32.81, 32.67, 25.81, 25.79, 21.77, 21.12, 20.60, 20.51, 13.87, 13.85.

ESI MS calcd for C<sub>21</sub>H<sub>32</sub>NO<sub>3</sub><sup>+</sup> [M+H]<sup>+</sup> 346.24, found 346.4.

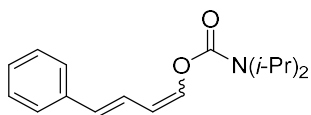

### (3*E*)-4-Phenylbuta-1,3-dien-1-yl diisopropylcarbamate (**3o**).

General procedure A was followed on a 0.200 g (1.52 mmol) scale of cinnamaldehyde **2o**, which after flash chromatography on silica gel (eluting with hexanes/Et<sub>2</sub>O = 90:10) afforded 0.261 g (63%) of the product as a yellow oil (*Z* : *E* = 85 : 15).

<sup>1</sup>H NMR (400 MHz, CDCl<sub>3</sub>) δ 7.52 (d, *J* = 12.3 Hz, 1H, *E*), 7.43 – 7.28 (m, 4H, *Z* + 4H, *E*), 7.26 – 7.18 (m, 1H, *Z* + 1H, *E*), 7.14 (dd, *J* = 6.4, 1.0 Hz, 1H, *Z*), 7.13 (ddd, *J* = 15.9, 11.0, 1.1 Hz, 1H, *Z*), 6.73 (dd, *J* = 15.6, 11.0 Hz, 1H, *E*), 6.54 (d, *J* = 15.9 Hz, 1H, *Z*), 6.48 (d, *J* = 15.7 Hz, 1H, *E*), 6.13 (dd, *J* = 12.2, 10.9 Hz, 1H, *E*), 5.58 (dd, *J* = 11.0, 6.4 Hz, 1H, *Z*), 4.38 – 3.57 (br m, 2H, *Z* + 2H, *E*), 1.49 – 1.10 (br m, 12H, *Z* + 12H, *E*).

<sup>13</sup>C NMR (101 MHz, CDCl<sub>3</sub>) δ 152.22, 140.17, 137.28, 135.77, 130.92, 130.21, 128.46, 128.40, 127.26, 126.93, 126.06, 125.80, 124.36, 121.50, 113.09, 110.29, 46.90, 45.64, 21.50, 20.17.

ESI MS calcd for C<sub>17</sub>H<sub>24</sub>NO<sub>2</sub><sup>+</sup> [M+H]<sup>+</sup> 274.18, found 274.2.

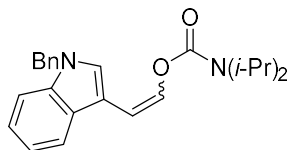

**2-(1-Benzyl-1*H*-indol-3-yl)vinyl diisopropylcarbamate (3p).**

General procedure A was followed on a 0.229 g (0.904 mmol) scale of 1-benzyl-1*H*-indole-3-carbaldehyde **2p** (prepared from indole-3-carbaldehyde according to the literature procedure<sup>11</sup>), which after flash chromatography on silica gel (eluting with hexanes/Et<sub>2</sub>O = 90:10) afforded 0.181 g (53%) of the product as a brown oil (*Z* : *E* = 85 : 15).

<sup>1</sup>H NMR (400 MHz, CDCl<sub>3</sub>) δ 7.85 (d, *J* = 12.8 Hz, 1H, *E*), 7.80 (ddd, *J* = 7.6, 1.5, 0.8 Hz, 1H, *E*), 7.70 (ddd, *J* = 7.7, 1.4, 0.8 Hz, 1H, *Z*), 7.46 (s, 1H, *Z*), 7.34 – 7.09 (m, 8H, *Z* + 9H, *E*), 7.24 (d, *J* = 6.9 Hz, 1H, *Z*), 6.48 (dd, *J* = 12.9, 0.6 Hz, 1H, *E*), 5.95 (dd, *J* = 6.9, 0.7 Hz, 1H, *Z*), 5.31 (s, 2H, *Z*), 5.28 (s, 2H, *E*), 4.23 (br s, 1H, *Z*), 4.08 (br s, 1H, *E*), 3.91 (br s, 1H, *E*), 3.68 (br s, 1H, *Z*), 1.41 – 1.02 (br m, 12H, *Z* + 12H, *E*).

<sup>13</sup>C NMR (101 MHz, CDCl<sub>3</sub>) δ 151.87, 137.40, 136.17, 135.54, 133.18, 128.94, 128.92, 127.89, 127.81, 127.57, 127.48, 127.10, 127.00, 126.77, 126.40, 126.16, 122.31, 120.41, 119.98, 119.85, 119.15, 109.94, 109.85, 109.63, 105.45, 100.83, 50.21, 50.11, 47.19, 45.93, 20.76.

ESI MS calcd for C<sub>24</sub>H<sub>29</sub>N<sub>2</sub>O<sub>2</sub><sup>+</sup> [M+H]<sup>+</sup> 377.22, found 377.2.

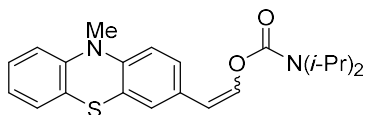

**2-(10-Methyl-10*H*-phenothiazin-3-yl)vinyl diisopropylcarbamate (3q).**

General procedure A was followed on a 0.155 g (0.642 mmol) scale of 10-methyl-10*H*-phenothiazine-3-carbaldehyde **2q** (prepared from 10-methylphenothiazine according to the literature procedure<sup>12</sup>), which after flash chromatography on C18 silica gel (gradient elution: water–acetonitrile 90:10 → acetonitrile) afforded 0.148 g (60%) of the product as a dark-orange solid (*Z* : *E* = 65 : 35).

<sup>1</sup>H NMR (400 MHz, CDCl<sub>3</sub>) δ 7.74 (d, *J* = 12.8 Hz, 1H, *E*), 7.49 (d, *J* = 2.0 Hz, 1H, *Z*), 7.21 (dd, *J* = 8.4, 2.0 Hz, 1H, *Z*), 7.19 – 7.06 (m, 2H, *Z* + 4H, *E*), 7.18 (d, *J* = 7.2 Hz, 1H, *Z*), 6.93 (dt, *J* = 7.6, 1.5 Hz, 1H, *Z*), 6.91 (dt, *J* = 7.5, 1.5 Hz, 1H, *E*), 6.80 (dd, *J* = 8.1, 1.1 Hz, 1H, *Z*), 6.79 (dd, *J* = 8.1, 1.1 Hz, 1H, *E*), 6.74 (d, *J* = 8.4 Hz, 1H, *Z*), 6.72 (d, *J* = 9.3 Hz, 1H, *E*), 6.19 (d, *J* = 12.8 Hz, 1H, *E*), 5.51 (d, *J* = 7.3 Hz, 1H, *Z*), 4.32 (br s, 1H, *Z*), 4.07 (br s, 1H, *E*), 3.88 (br s, 1H, *E*), 3.77 (br s, 1H, *Z*), 3.37 (s, 3H, *Z*), 3.35 (s, 3H, *E*), 1.33 (br s, 12H, *Z*), 1.27 (br d, *J* = 6.9 Hz, 12H, *E*).

<sup>13</sup>C NMR (151 MHz, CDCl<sub>3</sub>) δ 152.80, 151.66, 145.72, 145.66, 144.56, 144.33, 136.80, 134.67, 129.56, 129.33, 128.01, 127.54, 127.27, 127.23, 127.16, 125.02, 124.53, 123.75, 123.23, 123.18, 123.14, 122.55, 122.51, 114.25, 114.15, 114.10, 113.80, 111.50, 108.43, 47.33, 46.92, 46.06, 35.40, 21.75, 21.21, 20.61, 20.49.

ESI MS calcd for C<sub>22</sub>H<sub>27</sub>N<sub>2</sub>O<sub>2</sub>S<sup>+</sup> [M+H]<sup>+</sup> 383.18, found 383.2.

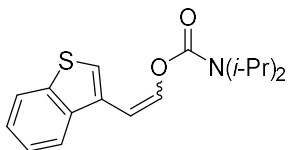

**2-(Benzo[*b*]thiophen-3-yl)vinyl diisopropylcarbamate (3r).**

General procedure A was followed on a 0.220 g (1.36 mmol) scale of benzo[*b*]thiophene-3-carbaldehyde **2r**, which after flash chromatography on silica gel (eluting with hexanes/Et<sub>2</sub>O = 90:10) afforded 0.337 g (82%) of the product as a dark-green oil (*Z* : *E* = 60 : 40).

<sup>1</sup>H NMR (400 MHz, CDCl<sub>3</sub>) δ 7.90 (d, *J* = 12.9 Hz, 1H, *E*), 7.88 – 7.84 (m, 2H, *Z*), 7.82 (dd, *J* = 7.4, 1.5 Hz, 1H, *Z*), 7.67 (s, 1H, *Z*), 7.44 (d, *J* = 7.1 Hz, 1H, *Z*), 7.45 – 7.32 (m, 1H, *Z* + 4H, *E*), 7.33 (s, 1H, *E*), 6.55 (dd, *J* = 12.8, 0.9 Hz, 1H, *E*), 5.96 (d, *J* = 7.0 Hz, 1H, *Z*), 4.24 (br s, 1H, *Z*), 4.07 (br s, 1H, *E*), 3.96 (br s, 1H, *E*), 3.79 (br s, 1H, *Z*), 1.31 (br s, 12H, *Z*), 1.25 (br s, 12H, *E*).

<sup>13</sup>C NMR (101 MHz, CDCl<sub>3</sub>) δ 152.70, 151.72, 140.47, 139.45, 138.73, 138.50, 137.94, 136.76, 130.71, 129.34, 124.56, 124.30, 123.89, 123.01, 122.78, 122.20, 121.87, 120.80, 105.41, 101.33, 47.09, 46.25, 21.80, 21.12, 20.59.

ESI MS calcd for C<sub>17</sub>H<sub>22</sub>NO<sub>2</sub>S<sup>+</sup> [M+H]<sup>+</sup> 304.14, found 304.1.

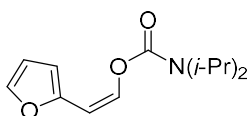

**(*Z*)-2-(Furan-2-yl)vinyl diisopropylcarbamate (3s).**

General procedure A was followed on a 0.150 g (1.56 mmol) scale of furfural **2s**, which after flash chromatography on silica gel (eluting with hexanes/Et<sub>2</sub>O = 90:10) afforded 0.187 g (50%) of the product as a dark-brown oil (*Z* : *E* = 90 : 10).

<sup>1</sup>H NMR (400 MHz, CDCl<sub>3</sub>) δ 7.82 (d, *J* = 12.7 Hz, 1H, *E*), 7.35 (dd, *J* = 1.9, 0.9 Hz, 1H, *Z*), 7.30 (d, *J* = 1.9 Hz, 1H, *E*), 7.21 (d, *J* = 7.3 Hz, 1H, *Z*), 6.43 (dd, *J* = 3.5, 0.9 Hz, 1H, *Z*), 6.42 (dd, *J* = 3.4, 1.7 Hz, 1H, *Z*), 6.34 (dd, *J* = 3.3, 1.9 Hz, 1H, *E*), 6.15 (d, *J* = 3.2 Hz, 1H, *E*), 6.13 (d, *J* = 12.7 Hz, 1H, *E*), 5.63 (d, *J* = 7.3 Hz, 1H, *Z*), 4.28 (br s, 1H, *Z*), 4.09 (br s, 1H, *E*), 3.84 (br s, 1H, *Z* + br s, 1H, *E*), 1.33 (br m, 6H, *Z*), 1.31 (br m, 6H, *Z*), 1.27 (br m, 6H, *E*), 1.25 (br m, 6H, *E*).

<sup>13</sup>C NMR only *z* (101 MHz, CDCl<sub>3</sub>) δ 151.68, 150.20, 141.18, 133.94, 111.41, 108.57, 99.33, 47.01, 46.36, 21.05, 20.56.

ESI MS calcd for C<sub>13</sub>H<sub>20</sub>NO<sub>3</sub><sup>+</sup> [M+H]<sup>+</sup> 238.14, found 238.2.

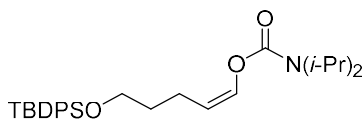

**(*Z*)-5-((*tert*-Butyldiphenylsilyloxy)pent-1-en-1-yl) diisopropylcarbamate (3t).**

General procedure A was followed on a 0.310 g (0.949 mmol) scale of 4-((*tert*-butyldiphenylsilyloxy)butanal **2t**

(prepared from butane-1,4-diol according to the literature procedure<sup>13</sup>), which after flash chromatography on silica gel (eluting with hexanes/Et<sub>2</sub>O = 90:10) afforded 0.297 g (67%) of the product as a colorless oil (*Z* : *E* = 95 : 5).

<sup>1</sup>H NMR (400 MHz, CDCl<sub>3</sub>) δ 7.75 – 7.57 (m, 4H, *Z*), 7.46 – 7.31 (m, 6H, *Z*), 6.99 (dt, *J* = 6.5, 1.6 Hz, 1H, *Z*), 4.69 (td, *J* = 7.3, 6.4 Hz, 1H, *Z*), 4.10 (br s, 1H, *Z*), 3.77 (br s, 1H, *Z*), 3.68 (t, *J* = 6.3 Hz, 2H, *Z*), 2.27 (qd, *J* = 7.5, 1.6 Hz, 2H, *Z*), 1.67 (pd, *J* = 7.5, 6.3, 1.6 Hz, 2H, *Z*), 1.23 (br d, *J* = 6.8 Hz, 12H, *Z*), 1.04 (s, 9H, *Z*).

<sup>13</sup>C NMR (151 MHz, CDCl<sub>3</sub>) δ 153.15, 135.69, 135.29, 134.09, 129.67, 127.73, 110.54, 63.63, 46.89, 45.71, 32.56, 26.98, 21.71, 21.66, 20.52, 19.34.

ESI MS calcd for C<sub>28</sub>H<sub>42</sub>NO<sub>3</sub>Si<sup>+</sup> [M+H]<sup>+</sup> 468.29, found 468.4.

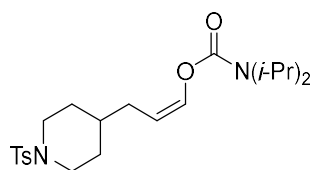

**(*Z*)-3-(1-Tosylpiperidin-4-yl)prop-1-en-1-yl diisopropylcarbamate (3u).**

General procedure A was followed on a 0.300 g (1.07 mmol) scale of 2-(1-tosylpiperidin-4-yl)acetaldehyde **2u** (prepared from 4-piperidineethanol according to the literature procedure<sup>14</sup>), which after flash chromatography on silica gel (eluting with hexanes/Et<sub>2</sub>O = 80:20) afforded 0.244 g (54%) of the product as a colorless oil (*Z* : *E* = 95 : 5).

<sup>1</sup>H NMR (400 MHz, CDCl<sub>3</sub>) δ 7.68 – 7.56 (m, 2H, *Z*), 7.35 – 7.25 (m, 2H, *Z*), 7.01 (dt, *J* = 6.5, 1.4 Hz, 1H, *Z*), 4.62 (td, *J* = 7.7, 6.4 Hz, 1H, *Z*), 4.09 (br s, 1H, *Z*), 3.76 (dt, *J* = 11.6, 2.5 Hz, 2H, *Z*), 3.72 (br s, 1H, *Z*), 2.42 (s, 3H, *Z*), 2.19 (td, *J* = 11.7, 2.5 Hz, 2H, *Z*), 2.06 (ddd, *J* = 7.8, 6.6, 1.5 Hz, 2H, *Z*), 1.80 – 1.68 (m, 2H, *Z*), 1.31 (qd, *J* = 12.7, 12.2, 4.1 Hz, 2H, *Z*), 1.31 – 1.13 (br m, 13H, *Z*).

<sup>13</sup>C NMR (101 MHz, CDCl<sub>3</sub>) δ 153.03, 143.48, 136.41, 133.25, 129.67, 127.83, 108.10, 46.88, 46.60, 45.75, 35.73, 31.56, 31.45, 27.80, 21.63, 20.49.

ESI MS calcd for C<sub>22</sub>H<sub>35</sub>N<sub>2</sub>O<sub>4</sub>S<sup>+</sup> [M+H]<sup>+</sup> 423.23, found 423.4.

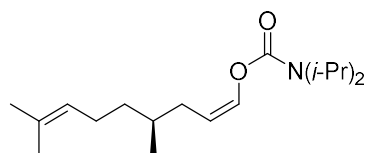

**(*S,Z*)-4,8-Dimethylnona-1,7-dien-1-yl diisopropylcarbamate (3v).**

General procedure A was followed on a 0.177 g (1.15 mmol) scale of (*S*)-citronellal **2v**, which after flash chromatography on silica gel (eluting with hexanes/Et<sub>2</sub>O = 96:4) afforded 0.202 g (59%) of the product as a pale-yellow oil (*Z* : *E* = 90 : 10).

<sup>1</sup>H NMR (400 MHz, CDCl<sub>3</sub>) δ 7.03 (dt, *J* = 6.5, 1.5 Hz, 1H, *Z*), 5.09 (thept, *J* = 7.1, 1.3 Hz, 1H, *Z*), 4.73 (td, *J* = 7.6, 6.5 Hz, 1H, *Z*), 4.11 (br s, 1H, *Z*), 3.80 (br s, 1H, *Z*), 2.16 (dddd, *J* = 14.5, 7.3, 5.6, 1.6 Hz, 1H, *Z*), 2.08 – 1.88 (m, 3H, *Z*), 1.68 (q, *J* = 1.3 Hz, 3H, *Z*), 1.60 (q, *J* = 1.3 Hz, 3H, *Z*), 1.57 – 1.45 (m, 1H, *Z*), 1.37 (dddd, *J* = 13.4, 9.4, 6.6, 5.5 Hz, 1H, *Z*), 1.32 – 1.17 (br m, 12H, *Z*), 1.17 (dddd, *J* = 13.6, 9.3, 7.9, 6.2 Hz, 1H, *Z*), 0.90 (d, *J* = 6.6 Hz, 3H, *Z*).

$^{13}\text{C}$  NMR (101 MHz,  $\text{CDCl}_3$ )  $\delta$  153.25, 135.75, 131.30, 124.93, 109.56, 46.89, 45.76, 36.93, 33.00, 32.32, 25.85, 25.78, 21.63, 20.55, 19.59, 17.76.

ESI MS calcd for  $\text{C}_{18}\text{H}_{33}\text{KNO}_2^+$   $[\text{M}+\text{K}]^+$  334.21, found 334.2.

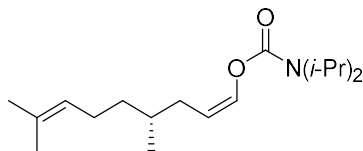

**(*R,Z*)-4,8-Dimethylnona-1,7-dien-1-yl diisopropylcarbamate (3v').**

General procedure A was followed on a 0.197 g (1.28 mmol) scale of (*R*)-citronellal **2v'**, which after flash chromatography on silica gel (eluting with hexanes/ $\text{Et}_2\text{O}$  = 96:4) afforded 0.230 g (61%) of the product as a pale-yellow oil (*Z* : *E* = 95 : 5).

$^1\text{H}$  NMR (400 MHz,  $\text{CDCl}_3$ )  $\delta$  7.03 (dt,  $J$  = 6.5, 1.5 Hz, 1H, *Z*), 5.09 (thept,  $J$  = 7.1, 1.3 Hz, 1H, *Z*), 4.73 (td,  $J$  = 7.6, 6.5 Hz, 1H, *Z*), 4.11 (br s, 1H, *Z*), 3.80 (br s, 1H, *Z*), 2.16 (dddd,  $J$  = 14.5, 7.3, 5.7, 1.6 Hz, 1H, *Z*), 2.07 – 1.90 (m, 3H, *Z*), 1.68 (q,  $J$  = 1.3 Hz, 3H, *Z*), 1.60 (q,  $J$  = 1.3 Hz, 3H, *Z*), 1.57 – 1.44 (m, 1H, *Z*), 1.37 (dddd,  $J$  = 13.4, 9.5, 6.6, 5.5 Hz, 1H, *Z*), 1.32 – 1.17 (br m, 12H, *Z*), 1.17 (dddd,  $J$  = 13.6, 9.3, 7.9, 6.2 Hz, 1H, *Z*), 0.90 (d,  $J$  = 6.7 Hz, 3H, *Z*).

$^{13}\text{C}$  NMR (101 MHz,  $\text{CDCl}_3$ )  $\delta$  153.24, 135.74, 131.28, 124.91, 109.54, 46.87, 45.75, 36.92, 32.99, 32.31, 25.83, 25.77, 21.62, 20.54, 19.57, 17.74.

ESI MS calcd for  $\text{C}_{18}\text{H}_{33}\text{NNaO}_2^+$   $[\text{M}+\text{Na}]^+$  318.24, found 318.2.

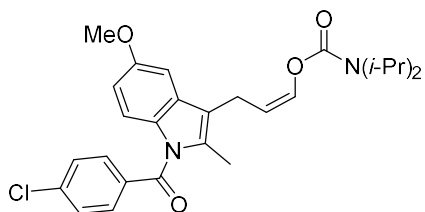

**(*Z*)-3-(1-(4-Chlorobenzoyl)-5-methoxy-2-methyl-1*H*-indol-3-yl)prop-1-en-1-yl diisopropylcarbamate (3w).**

General procedure A was followed on a 0.560 g (1.64 mmol) scale of 2-(1-(4-chlorobenzoyl)-5-methoxy-2-methyl-1*H*-indol-3-yl)acetaldehyde **2w** (prepared from indomethacin according to the literature procedure<sup>15</sup>), which after flash chromatography on C18 silica gel (gradient elution: water–acetonitrile 90:10 → acetonitrile) afforded 0.279 g (35%) of the product as a dark-orange solid (*Z* : *E* = 90 : 10).

$^1\text{H}$  NMR (400 MHz,  $\text{CDCl}_3$ )  $\delta$  7.69 – 7.60 (m, 2H, *Z*), 7.50 – 7.42 (m, 2H, *Z*), 7.13 (dt,  $J$  = 6.4, 1.8 Hz, 1H, *Z*), 6.94 (d,  $J$  = 2.5 Hz, 1H, *Z*), 6.88 (d,  $J$  = 9.0 Hz, 1H, *Z*), 6.66 (dd,  $J$  = 9.0, 2.6 Hz, 1H, *Z*), 4.82 (q,  $J$  = 7.0 Hz, 1H, *Z*), 4.07 (br s, 1H, *Z*), 3.97 (br s, 1H, *Z*), 3.81 (s, 3H, *Z*), 3.54 (dd,  $J$  = 7.1, 1.9 Hz, 2H, *Z*), 2.35 (s, 3H, *Z*), 1.44 – 1.17 (br m, 12H, *Z*).

$^{13}\text{C}$  NMR (151 MHz,  $\text{CDCl}_3$ )  $\delta$  168.46, 156.01, 152.80, 139.20, 135.73, 134.30, 134.21, 131.25, 131.08, 129.23, 122.98, 118.04, 115.11, 111.44, 108.51, 101.55, 55.79, 46.95, 46.08, 21.76, 20.55, 20.27, 13.40.

ESI MS calcd for  $\text{C}_{27}\text{H}_{32}\text{ClN}_2\text{O}_4^+$   $[\text{M}+\text{H}]^+$  483.20, found 483.4.



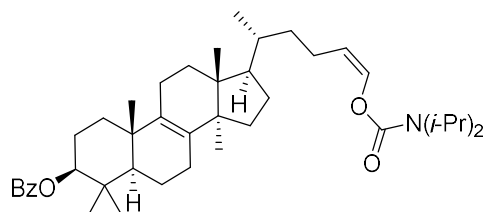

**(3*S*,5*R*,10*S*,13*R*,14*R*,17*R*)-17-((*R,Z*)-6-((Diisopropylcarbamoyl)oxy)hex-5-en-2-yl)-4,4,10,13,14-pentamethyl-2,3,4,5,6,7,10,11,12,13,14,15,16,17-tetradecahydro-1*H*-cyclopenta[*a*]phenanthren-3-yl benzoate (3*x*).**

General procedure A was followed on a 0.362 g (0.717 mmol) scale of aldehyde **2x** (prepared from lanosterol according to the literature procedures<sup>16,17</sup>), which after flash chromatography on silica gel (eluting with hexanes/Et<sub>2</sub>O = 80:20) afforded 0.263 g (57%) of the product as an off-white solid (*Z* : *E* = 90 : 10).

<sup>1</sup>H NMR (400 MHz, CDCl<sub>3</sub>) δ 8.09 – 8.01 (m, 2H, *Z*), 7.60 – 7.50 (m, 1H, *Z*), 7.49 – 7.40 (m, 2H, *Z*), 6.98 (dt, *J* = 6.4, 1.5 Hz, 1H, *Z*), 4.75 (dd, *J* = 11.5, 4.4 Hz, 1H, *Z*), 4.71 (dd, *J* = 7.5, 6.4 Hz, 1H, *Z*), 4.11 (br s, 1H, *Z*), 3.82 (br s, 1H, *Z*), 2.32 – 2.15 (m, 1H, *Z*), 2.13 – 1.98 (m, 6H, *Z*), 2.01 – 1.06 (m, 28H, *Z*), 1.05 (s, 3H, *Z*), 1.05 (s, 3H, *Z*), 0.96 (s, 3H, *Z*), 0.93 (d, *J* = 6.3 Hz, 3H, *Z*), 0.89 (s, 3H, *Z*), 0.70 (s, 3H, *Z*).

<sup>13</sup>C NMR (151 MHz, CDCl<sub>3</sub>) δ 166.44, 153.27, 134.94, 134.63, 134.38, 132.85, 131.13, 129.67, 128.46, 111.61, 81.69, 50.70, 50.45, 49.97, 46.90, 45.73, 44.64, 38.35, 37.08, 36.27, 36.12, 35.41, 31.10, 30.96, 28.37, 28.23, 26.52, 24.40, 24.38, 22.03, 21.70, 21.17, 20.54, 19.36, 18.69, 18.29, 16.97, 15.91.

ESI MS calcd for C<sub>42</sub>H<sub>64</sub>NO<sub>4</sub><sup>+</sup> [M+H]<sup>+</sup> 646.48, found 646.6.

# Optimization of Asymmetric Hydroboration

Table S1. Screening of chiral ligands in the asymmetric hydroboration<sup>a</sup>

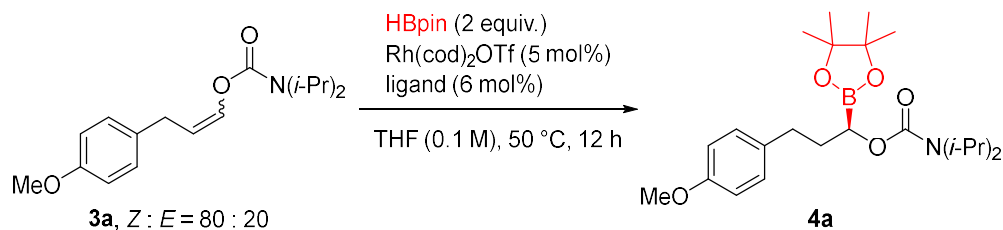

|                            | Entry | Ligand     | R                                                                 | R'                                                | Yield (%) <sup>b</sup> | ee (%) <sup>c</sup> |
|----------------------------|-------|------------|-------------------------------------------------------------------|---------------------------------------------------|------------------------|---------------------|
| <p>Duanphos <b>L1</b></p>  | 1     | <b>L1</b>  | –                                                                 | –                                                 | (trace)                | 7                   |
|                            | 2     | <b>L2a</b> | Me                                                                | –                                                 | 0                      | –                   |
|                            | 3     | <b>L2b</b> | Et                                                                | –                                                 | 13                     | 34                  |
| <p>BPE <b>L2</b></p>       | 4     | <b>L2c</b> | <i>i</i> -Pr                                                      | –                                                 | 0                      | –                   |
|                            | 5     | <b>L2d</b> | Ph                                                                | –                                                 | 0                      | –                   |
|                            | 6     | <b>L4a</b> | Me                                                                | –                                                 | 21                     | n.d.                |
|                            | 7     | <b>L4b</b> | Et                                                                | –                                                 | 18                     | n.d.                |
| <p>Duphos <b>L3</b></p>    | 8     | <b>L4c</b> | <i>i</i> -Pr                                                      | –                                                 | 0                      | –                   |
|                            | 9     | <b>L3a</b> | Me                                                                | –                                                 | 47                     | 49                  |
|                            | 10    | <b>L3b</b> | Et                                                                | –                                                 | 52                     | 65                  |
|                            | 11    | <b>L3c</b> | <i>i</i> -Pr                                                      | –                                                 | 0                      | –                   |
|                            | 12    | <b>L5a</b> | Ph                                                                | Cy                                                | (trace)                | n.d.                |
| <p>Ferrocene <b>L4</b></p> | 13    | <b>L5b</b> | Ph                                                                | <i>t</i> -Bu                                      | 69                     | 10                  |
|                            | 14    | <b>L5c</b> | Cy                                                                | Cy                                                | 35                     | 3                   |
|                            | 15    | <b>L5d</b> | Cy                                                                | Ph                                                | (trace)                | n.d.                |
|                            | 16    | <b>L5e</b> | Ph                                                                | 3,5-Me <sub>2</sub> C <sub>6</sub> H <sub>3</sub> | 0                      | –                   |
|                            | 17    | <b>L5f</b> | 3,5-(CF <sub>3</sub> ) <sub>2</sub> C <sub>6</sub> H <sub>3</sub> | Cy                                                | 0                      | –                   |
|                            | 18    | <b>L5g</b> | 4-MeO-3,5-Me <sub>2</sub> C <sub>6</sub> H <sub>2</sub>           | Cy                                                | 64                     | 66                  |
|                            | 19    | <b>L5h</b> | 3,5-(CF <sub>3</sub> ) <sub>2</sub> C <sub>6</sub> H <sub>3</sub> | 3,5-Me <sub>2</sub> C <sub>6</sub> H <sub>3</sub> | 0                      | –                   |
| <p>Josiphos <b>L5</b></p>  | 20    | <b>L5i</b> | Cy                                                                | <i>t</i> -Bu                                      | 0                      | –                   |
|                            | 21    | <b>L6a</b> | <i>t</i> -Bu                                                      | Ph                                                | 0                      | –                   |
| <p>JoSPOphos <b>L6</b></p> | 22    | <b>L6b</b> | Ph                                                                | <i>t</i> -Bu                                      | 50                     | 91                  |

<sup>a</sup>Reactions were run on a 0.07 mmol scale; starting material, reagents and solvent were mixed in a N<sub>2</sub>-filled glove box. <sup>b</sup>Yields were determined by <sup>1</sup>H NMR using triphenylmethane as an internal standard. <sup>c</sup>Enantiomeric excess (ee) values were determined by HPLC on chiral media.

### General Procedure B for Table S1

Substrate **3a** (126 mg, 432  $\mu\text{mol}$ , 1.00 equiv) and triphenylmethane (106 mg, 432  $\mu\text{mol}$ , 1.00 equiv) were weighed in a 2-dram screw-cap vial, which was then transferred into a  $\text{N}_2$ -filled glove box.

The following manipulations were carried out inside a glove box. Six different ligands (2–6  $\mu\text{mol}$ ) were weighed in six 1-dram screw-cap vials equipped with stir bars.  $[\text{Rh}(\text{cod})_2]\text{OTf}$  (10 mg, 21  $\mu\text{mol}$ , 5 mol%) was weighed in a separate 2-dram screw-cap vial and then dissolved in THF (3.92 mL). Catalyst solution was transferred to the vial containing substrate **3a** and triphenylmethane (additional 0.40-mL portion of THF was used for rinsing). Six aliquots of this solution were added to each of the six vials with ligands (volume of each aliquot was calculated individually for each reaction based on the exact weight of the ligand, so that the amount of ligand in the resulting mixture was 6 mol% relative to **3a**). An additional 0.05-mL aliquot was transferred to a separate vial and then used for “zero point”  $^1\text{H}$  NMR. HBpin (2.0 equiv) was then added to each reaction vial. All mixtures were briefly stirred, and the reaction vials were sealed with Teflon screw caps.

Reaction mixtures were removed from the glove box and stirred at 50  $^\circ\text{C}$  for 12 h. Ca. 0.05-mL aliquots were taken and used for  $^1\text{H}$  NMR analysis to determine product yields. If product yield was greater than 20%, the mixture was concentrated, and the product was purified by flash column chromatography on silica gel (hexanes/EtOAc = 70:30). The purified product was analyzed by chiral HPLC (CHIRALCEL<sup>®</sup> OZ-3, 0.75% IPA in hexane, 1.0 mL/min, 220 nm).

Racemic sample was obtained by running the reaction using 1,1'-bis(diisopropylphosphino)ferrocene (DiPrPF)<sup>18</sup> instead of **L6b** as a ligand.

**Table S2. Optimization of reaction conditions<sup>a</sup>**

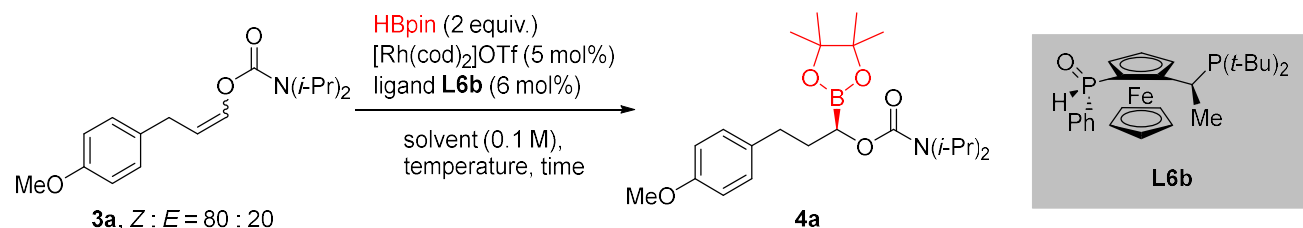

| Entry           | Solvent                         | Temp. (°C) | Time (h)  | Yield (%) <sup>b</sup> | ee (%) <sup>c</sup> |
|-----------------|---------------------------------|------------|-----------|------------------------|---------------------|
| 1               | THF                             | 50         | 12        | 50                     | 91                  |
| 2 <sup>d</sup>  | THF                             | 50         | 12        | 30                     | n.d.                |
| 3               | PhMe                            | 50         | 12        | 43                     | 87                  |
| 4               | xylenes                         | 50         | 12        | 28                     | 81                  |
| 5               | Et <sub>2</sub> O               | 35         | 12        | 10                     | n.d.                |
| 6               | CH <sub>2</sub> Cl <sub>2</sub> | 40         | 12        | 12                     | n.d.                |
| 7               | DCE                             | 50         | 12        | 46                     | 94                  |
| 8               | dioxane                         | 50         | 12        | 0                      | –                   |
| 9               | MeCN                            | 50         | 12        | 0                      | –                   |
| 10              | MeTHF                           | 50         | 12        | 36                     | 91                  |
| 11              | DMF                             | 50         | 12        | 0                      | –                   |
| 12              | PhCF <sub>3</sub>               | 50         | 12        | 81                     | 85                  |
| 13 <sup>e</sup> | PhCF <sub>3</sub>               | 50         | 12        | 80 <sup>f</sup>        | 78                  |
| 14 <sup>g</sup> | PhCF <sub>3</sub>               | 50         | 12        | 0                      | –                   |
| 15 <sup>h</sup> | PhCF <sub>3</sub>               | 50         | 12        | 77                     | 70                  |
| 16              | PhCF <sub>3</sub>               | 35         | 12        | 59                     | 95                  |
| 17 <sup>e</sup> | <b>PhCF<sub>3</sub></b>         | <b>35</b>  | <b>18</b> | <b>65<sup>f</sup></b>  | <b>97</b>           |
| 18              | PhCF <sub>3</sub>               | 35         | 24        | 85                     | 83                  |
| 19              | PhCF <sub>3</sub>               | rt         | 24        | 50                     | n.d.                |
| 20              | PhCF <sub>3</sub>               | rt         | 48        | 68                     | 93                  |
| 21 <sup>e</sup> | <b>PhCF<sub>3</sub></b>         | <b>rt</b>  | <b>48</b> | <b>67<sup>f</sup></b>  | <b>98</b>           |

<sup>a</sup>Reactions were run on a 0.05 mmol scale; starting material, reagents and solvent were mixed in a N<sub>2</sub>-filled glove box.

<sup>b</sup>Yields were determined by <sup>1</sup>H NMR using triphenylmethane as an internal standard. <sup>c</sup>Enantiomeric excess (ee) values were determined by HPLC on chiral media. <sup>d</sup>[Rh(cod)Cl]<sub>2</sub> (5 mol%) was used as a catalyst, with AgOTf (6 mol%) as an additive. <sup>e</sup>Reaction was run on a 0.35 mmol scale. <sup>f</sup>Isolated yield. <sup>g</sup>No glove box was used. <sup>h</sup>Starting material with Z : E = 55 : 45 was used.

### General Procedure C for Table S2 (0.05 mmol scale reactions)

Substrate **3a** (21 mg, 72  $\mu\text{mol}$ ) and triphenylmethane (17 mg, 70  $\mu\text{mol}$ ) were weighed in a 2-dram screw-cap vial, which was then transferred into a  $\text{N}_2$ -filled glove box.

The following manipulations were carried out inside a glove box. Ligand **L6b** (1.5 mg, 3.1  $\mu\text{mol}$ , 6 mol%) was weighed in a 1-dram screw-cap vial. Substrate **3a** and triphenylmethane were dissolved in a solvent (0.72 mL). It was assumed that the resulting solution was 0.10 M with respect to the substrate **3a**. 0.51 mL of this solution was transferred to the vial with ligand (the remaining portion was used for “zero point”  $^1\text{H}$  NMR).  $[\text{Rh}(\text{cod})_2]\text{OTf}$  (1.2 mg, 2.6  $\mu\text{mol}$ , 5 mol%) was weighed in a 1-dram screw-cap vial equipped with a stir bar. The solution of substrate **3a**, triphenylmethane and ligand **L6b** was transferred to the vial with catalyst. HBpin (15  $\mu\text{L}$ , 13 mg, 0.10 mmol, 2.0 equiv) was then added, and the mixture was briefly stirred. The reaction vial was sealed with Teflon screw cap.

Reaction mixture was removed from the glove box and stirred at the required temperature for the required period of time (in accordance with Table S2). Ca. 0.05-mL aliquot was taken and used for  $^1\text{H}$  NMR analysis to determine product yield. If product yield was greater than 20%, the mixture was concentrated, and the product was purified by flash column chromatography on silica gel (hexanes/EtOAc = 70:30). The purified product was analyzed by chiral HPLC (CHIRALCEL® OZ-3, 0.75% IPA in hexane, 1.0 mL/min, 220 nm).

### General Procedure D for Table S2 (0.35 mmol scale reactions)

Substrate **3a** (100 mg, 0.350 mmol, 1.00 equiv) was weighed in a 2-dram screw-cap vial, which was then transferred into a  $\text{N}_2$ -filled glove box.

The following manipulations were carried out inside a glove box. Ligand **L6b** (10 mg, 21  $\mu\text{mol}$ , 6 mol%) was weighed in a 1-dram screw-cap vial;  $[\text{Rh}(\text{cod})_2]\text{OTf}$  (8.2 mg, 18  $\mu\text{mol}$ , 5 mol%) was weighed in a separate 2-dram screw-cap vial equipped with a stir bar. Substrate **3a** was dissolved in  $\text{PhCF}_3$  (3.00 mL), and the resulting solution was transferred to the vial with ligand (additional 0.50-mL portion of  $\text{PhCF}_3$  was used for rinsing). The solution of substrate **3a** and ligand **L6b** was then transferred to the vial with catalyst. HBpin (102  $\mu\text{L}$ , 90 mg, 0.70 mmol, 2.0 equiv) was then added, and the mixture was briefly stirred. The reaction vial was sealed with Teflon screw cap.

Reaction mixture was removed from the glove box and stirred at the required temperature for the required period of time (in accordance with Table S2). The mixture was concentrated, and the product was purified by flash column chromatography on silica gel (hexanes/EtOAc = 70:30). The purified product was analyzed by chiral HPLC (CHIRALCEL® OZ-3, 0.75% IPA in hexane, 1.0 mL/min, 220 nm).

# Scope of Asymmetric Hydroboration

## General Procedure E for asymmetric hydroboration

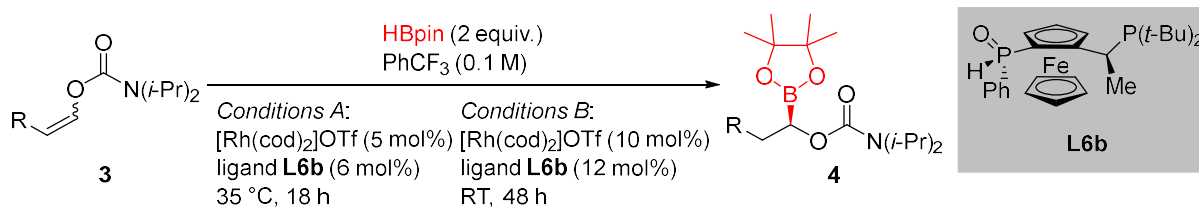

Enol carbamate **3** (0.50 mmol, 1.0 equiv) was weighed in a 2-dram screw-cap vial, which was then transferred into a N<sub>2</sub>-filled glove box.

The following manipulations were carried out inside a glove box. Ligand **L6b** (14–28 mg, 30–60 μmol, 6–12 mol%) was weighed in a 1-dram screw-cap vial; [Rh(cod)<sub>2</sub>]OTf (12–24 mg, 25–50 μmol, 5–10 mol%) was weighed in a separate 20-mL screw-cap vial equipped with a stir bar. Substrate **3** was dissolved in PhCF<sub>3</sub> (4.0 mL), and the resulting solution was transferred to the vial with ligand (additional 1.0-mL portion of PhCF<sub>3</sub> was used for rinsing). The solution of substrate **3** and ligand **L6b** was then transferred to the vial with catalyst. HBpin (0.15 μL, 0.13 g, 1.0 mmol, 2.0 equiv) was then added, and the mixture was briefly stirred. The reaction vial was sealed with Teflon screw cap.

Reaction mixture was removed from the glove box and stirred at 35 °C (*Conditions A*) or at room temperature (*Conditions B*) with the reaction progress monitored by <sup>1</sup>H NMR (aliquots for analysis were withdrawn inside a glove box). Generally, hydroboration is complete in 18 h at 35 °C and in 48 h at room temperature.

The mixture was concentrated, and pinacol was removed by transferring the crude product into a 250-mL round-bottom flask, dissolving in MeOH (2 mL), adding water (0.4–0.8 mL) until the solution becomes cloudy, and concentrating on a rotavap. After 6–9 azeotropic evaporation cycles pinacol is removed (as indicated by absence of the 1.24 ppm peak in <sup>1</sup>H NMR).<sup>19</sup> Subsequent flash chromatography afforded the desired enantioenriched hydroboration product **4**.

Racemic product samples were obtained by following the same procedure using 1,1'-bis(diisopropylphosphino)ferrocene (DiPrPF) instead of **L6b** as a ligand.

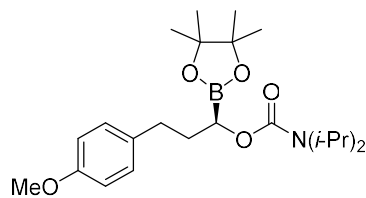

**(R)-3-(4-Methoxyphenyl)-1-(4,4,5,5-tetramethyl-1,3,2-dioxaborolan-2-yl)propyl diisopropylcarbamate (4a).**

General procedure E was followed on a 102 mg (0.350 mmol) scale of **3a** with 6 mol% of **L6b** and 5 mol% of the catalyst at room temperature (the reaction was complete in 48 h). Flash chromatography on silica gel (eluting with hexanes/EtOAc = 70:30) afforded 98 mg (67%) of the product as a pale-yellow oil. Absolute stereochemistry was assigned by analogy to **4d**.

<sup>1</sup>H NMR (400 MHz, CDCl<sub>3</sub>) δ 7.16 – 7.07 (m, 2H), 6.87 – 6.77 (m, 2H), 4.07 (hept, *J* = 6.9 Hz, 1H), 3.82 (dd, *J* = 10.6, 3.9 Hz, 1H), 3.78 (s, 3H), 3.76 (hept, *J* = 6.9 Hz, 1H), 2.79 (ddd, *J* = 14.7, 9.9, 5.3 Hz, 1H), 2.65 (ddd, *J* = 13.8, 9.4, 6.6 Hz, 1H), 2.03 – 1.93 (m, 1H), 1.92 – 1.80 (m, 1H), 1.28 – 1.20 (m, 12H), 1.17 (s, 12H).

<sup>13</sup>C NMR (101 MHz, CDCl<sub>3</sub>) δ 162.77, 157.66, 134.60, 129.42, 113.70, 79.74, 55.26, 48.44, 46.61, 33.61, 33.35, 25.30, 24.96, 20.62, 20.61, 20.35, 20.26 (the carbon attached to boron was not observed due to quadrupolar relaxation<sup>20</sup>).

<sup>11</sup>B NMR (128 MHz, CDCl<sub>3</sub>) δ 12.86.

ESI MS calcd for C<sub>23</sub>H<sub>39</sub>BNO<sub>5</sub><sup>+</sup> [M+H]<sup>+</sup> 420.29, found 420.2.

Chiral HPLC CHIRALCEL® OZ-3, 0.75% IPA in hexane, 1.0 mL/min, 220 nm: 98% ee

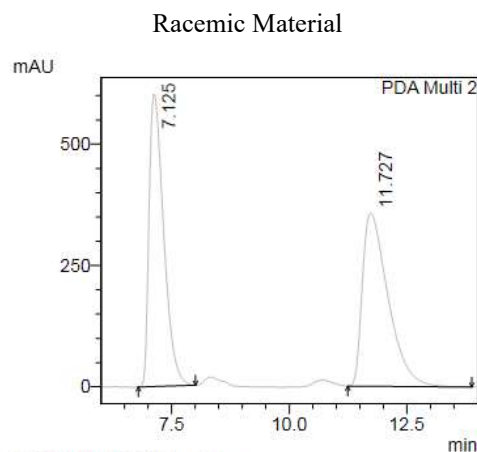

| PeakTable |           |          |         |
|-----------|-----------|----------|---------|
| Peak#     | Ret. Time | Area     | Area %  |
| 1         | 7.125     | 13029627 | 49.036  |
| 2         | 11.727    | 13541857 | 50.964  |
| Total     |           | 26571484 | 100.000 |

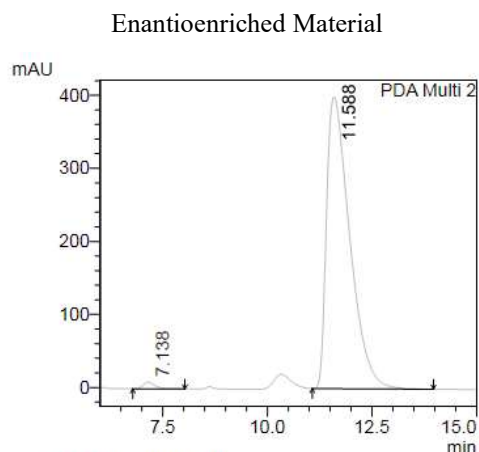

| PeakTable |           |          |         |
|-----------|-----------|----------|---------|
| Peak#     | Ret. Time | Area     | Area %  |
| 1         | 7.138     | 186856   | 1.199   |
| 2         | 11.588    | 15394461 | 98.801  |
| Total     |           | 15581317 | 100.000 |

The same reaction was run on a 284 mg (0.974 mmol) scale of **3a** (complete in 57 h), and it afforded 231 mg (57%) of the product with identical spectral data.

**Chiral HPLC** CHIRALCEL® OZ-3, 0.75% IPA in hexane, 1.0 mL/min, 220 nm: 92% ee

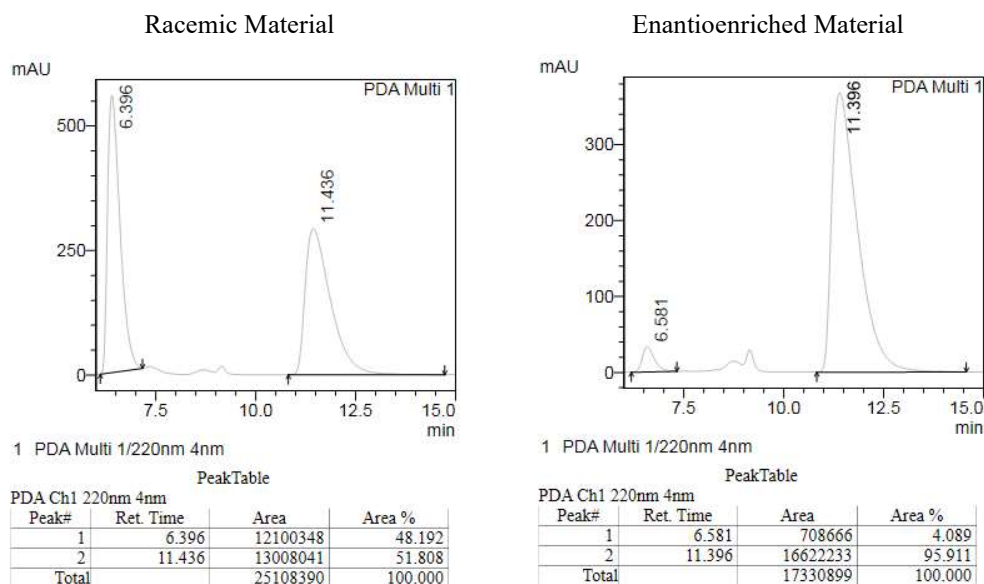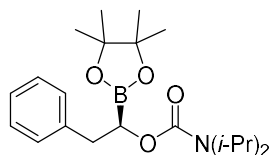

**(R)-2-Phenyl-1-(4,4,5,5-tetramethyl-1,3,2-dioxaborolan-2-yl)ethyl diisopropylcarbamate (4b).**

General procedure E was followed on a 76 mg (0.31 mmol) scale of **3b** with 6 mol% of **L6b** and 5 mol% of the catalyst at 35 °C (the reaction was complete in 18 h). Flash chromatography on silica gel (eluting with hexanes/EtOAc = 70:30) afforded 70 mg (60%) of the product as a pale-yellow oil. Absolute stereochemistry was assigned by analogy to **4d**.

<sup>1</sup>H NMR (400 MHz, CDCl<sub>3</sub>) δ 7.32 – 7.23 (m, 4H), 7.22 – 7.14 (m, 1H), 4.10 (dd, *J* = 8.6, 6.6 Hz, 1H), 4.04 (hept, *J* = 6.8 Hz, 1H), 3.72 (hept, *J* = 6.8 Hz, 1H), 3.02 – 2.90 (m, 2H), 1.25 (d, *J* = 7.0 Hz, 6H), 1.20 (s, 6H), 1.19 (s, 6H), 1.08 (d, *J* = 6.9 Hz, 6H).

<sup>13</sup>C NMR (151 MHz, CDCl<sub>3</sub>) δ 162.83, 141.25, 128.92, 128.23, 125.82, 79.96, 48.48, 46.79, 37.91, 25.30, 25.01, 20.55, 20.48, 20.42, 20.35 (the carbon attached to boron was not observed due to quadrupolar relaxation).

<sup>11</sup>B NMR (128 MHz, CDCl<sub>3</sub>) δ 12.50.

ESI MS calcd for C<sub>21</sub>H<sub>35</sub>BNO<sub>4</sub><sup>+</sup> [M+H]<sup>+</sup> 376.27, found 376.2.

**Chiral HPLC** CHIRALCEL® OZ-3, 0.4% IPA in hexane, 1.0 mL/min, 200 nm: 91% ee



Racemic Material

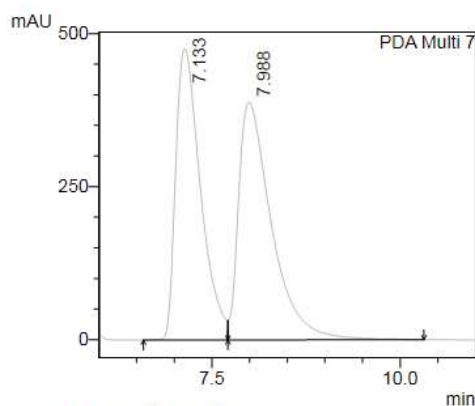

1 PDA Multi 7/200nm 4nm

PeakTable

| Peak# | Ret. Time | Area     | Area %  |
|-------|-----------|----------|---------|
| 1     | 7.133     | 10919759 | 48.002  |
| 2     | 7.988     | 11828675 | 51.998  |
| Total |           | 22748434 | 100.000 |

Enantioenriched Material

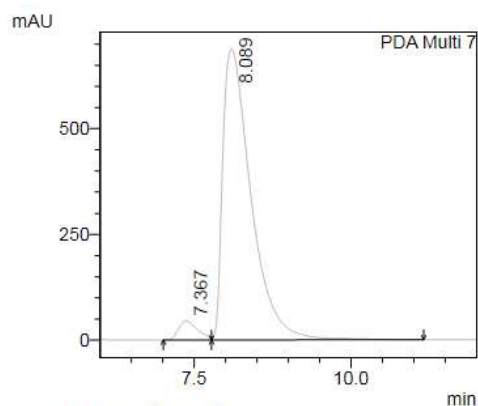

1 PDA Multi 7/200nm 4nm

PeakTable

| Peak# | Ret. Time | Area     | Area %  |
|-------|-----------|----------|---------|
| 1     | 7.367     | 974742   | 4.321   |
| 2     | 8.089     | 21582766 | 95.679  |
| Total |           | 22557507 | 100.000 |

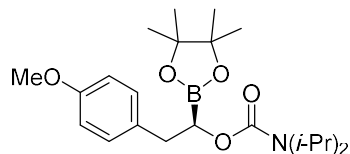

**(R)-2-(4-Methoxyphenyl)-1-(4,4,5,5-tetramethyl-1,3,2-dioxaborolan-2-yl)ethyl diisopropylcarbamate (4c).**

General procedure E was followed on an 88 mg (0.32 mmol) scale of **3c** with 6 mol% of **L6b** and 5 mol% of the catalyst at 35 °C (the reaction was complete in 18 h). Flash chromatography on silica gel (eluting with hexanes/EtOAc = 70:30) afforded 83 mg (64%) of the product as a pale-yellow oil. Absolute stereochemistry was assigned by analogy to **4d**.

<sup>1</sup>H NMR (400 MHz, CDCl<sub>3</sub>) δ 7.20 – 7.14 (m, 2H), 6.86 – 6.79 (m, 2H), 4.08 – 3.98 (m, 2H), 3.78 (s, 3H), 3.73 (hept, *J* = 6.8 Hz, 1H), 2.97 – 2.84 (m, 2H), 1.25 (d, *J* = 6.8 Hz, 6H), 1.20 (s, 6H), 1.18 (s, 6H), 1.09 (d, *J* = 6.8 Hz, 6H).

<sup>13</sup>C NMR (151 MHz, CDCl<sub>3</sub>) δ 162.85, 157.82, 133.32, 129.82, 113.65, 79.96, 55.35, 48.45, 46.82, 36.99, 25.31, 25.02, 20.58, 20.52, 20.44, 20.37 (the carbon attached to boron was not observed due to quadrupolar relaxation).

<sup>11</sup>B NMR (128 MHz, CDCl<sub>3</sub>) δ 12.66.

ESI MS calcd for C<sub>22</sub>H<sub>37</sub>BNO<sub>5</sub><sup>+</sup> [M+H]<sup>+</sup> 406.28, found 406.3.

Chiral HPLC CHIRALCEL® OZ-3, 1.0% IPA in hexane, 1.0 mL/min, 225 nm: 91% ee

Racemic Material

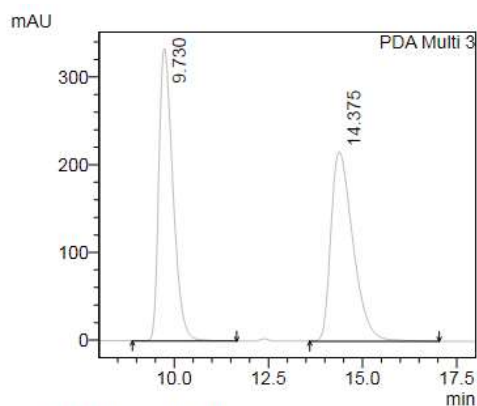

1 PDA Multi 3/225nm 4nm

PeakTable

| Peak# | Ret. Time | Area     | Area %  |
|-------|-----------|----------|---------|
| 1     | 9.730     | 8664469  | 49.580  |
| 2     | 14.375    | 8811225  | 50.420  |
| Total |           | 17475694 | 100.000 |

Enantioenriched Material

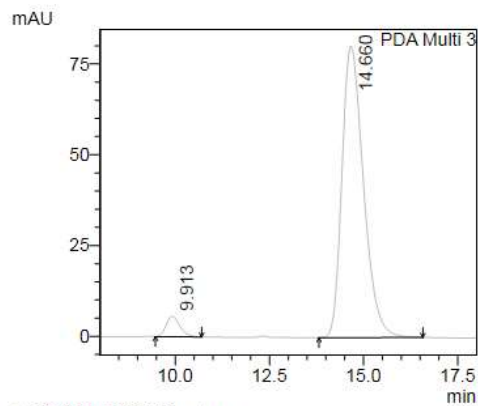

1 PDA Multi 3/225nm 4nm

PeakTable

| Peak# | Ret. Time | Area    | Area %  |
|-------|-----------|---------|---------|
| 1     | 9.913     | 142720  | 4.269   |
| 2     | 14.660    | 3200743 | 95.731  |
| Total |           | 3343463 | 100.000 |

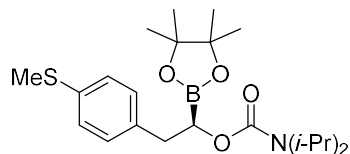

**(R)-2-(4-(Methylthio)phenyl)-1-(4,4,5,5-tetramethyl-1,3,2-dioxaborolan-2-yl)ethyl diisopropylcarbamate (4d).**

General procedure E was followed on a 104 mg (0.354 mmol) scale of **3d** with 6 mol% of **L6b** and 5 mol% of the catalyst at 35 °C (the reaction was complete in 18 h). Flash chromatography on silica gel (eluting with hexanes/EtOAc = 70:30) afforded 95 mg (64%) of the product as a beige solid. Absolute stereochemistry was assigned by X-ray crystallography.

<sup>1</sup>H NMR (400 MHz, CDCl<sub>3</sub>) δ 7.24 – 7.14 (m, 4H), 4.11 – 3.98 (m, 2H), 3.73 (hept, *J* = 6.8 Hz, 1H), 2.99 – 2.85 (m, 2H), 2.47 (s, 3H), 1.25 (d, *J* = 6.6 Hz, 6H), 1.20 (s, 6H), 1.19 (s, 6H), 1.09 (d, *J* = 6.8 Hz, 6H).

<sup>13</sup>C NMR (151 MHz, CDCl<sub>3</sub>) δ 162.80, 138.45, 135.19, 129.48, 127.06, 79.99, 48.48, 46.86, 37.39, 25.32, 25.02, 20.58, 20.52, 20.43, 20.36, 16.46 (the carbon attached to boron was not observed due to quadrupolar relaxation).

<sup>11</sup>B NMR (128 MHz, CDCl<sub>3</sub>) δ 12.54.

ESI MS calcd for C<sub>22</sub>H<sub>37</sub>BNO<sub>4</sub>S<sup>+</sup> [M+H]<sup>+</sup> 422.25, found 422.2.

Chiral HPLC CHIRALCEL® OZ-3, 1.0% IPA in hexane, 1.0 mL/min, 205 nm: 95% ee

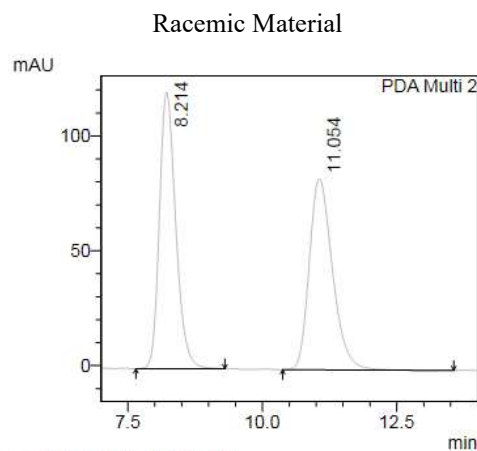

| PeakTable |           |         |         |
|-----------|-----------|---------|---------|
| Peak#     | Ret. Time | Area    | Area %  |
| 1         | 8.214     | 2548146 | 50.518  |
| 2         | 11.054    | 2495867 | 49.482  |
| Total     |           | 5044013 | 100.000 |

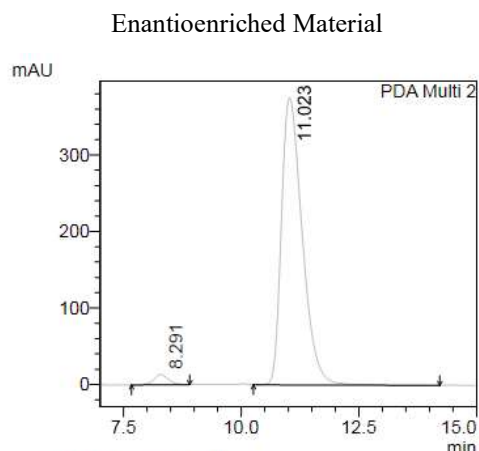

| PeakTable |           |          |         |
|-----------|-----------|----------|---------|
| Peak#     | Ret. Time | Area     | Area %  |
| 1         | 8.291     | 295226   | 2.503   |
| 2         | 11.023    | 11501873 | 97.497  |
| Total     |           | 11797100 | 100.000 |

**X-ray crystallography.** Crystals grew as clusters of large, colorless prisms by slow evaporation from hexane/EtOAc 70:30. The data crystal was cut from a larger crystal and had approximate dimensions:  $0.43 \times 0.22 \times 0.11$  mm. The data were collected on a Rigaku Oxford Diffraction HyPix6000E Dual Source diffractometer using a  $\mu$ -focus Cu K $\alpha$  radiation source ( $\lambda = 1.5418 \text{ \AA}$ ) with collimating mirror monochromators. A total of 4455 frames of data were collected using  $\omega$ -scans with a scan range of  $0.5^\circ$  and a counting time of 4 seconds per frame for frames collected with a detector offset of  $\pm 48.2^\circ$  and 16 seconds per frame with frames collected with a detector offset of  $107.8^\circ$ . The data were collected at 100 K using an Oxford Cryostream low temperature device. Details of crystal data, data collection and structure refinement are listed in Table S3. Data collection, unit cell refinement and data reduction were performed using Rigaku Oxford Diffraction's CrysAlisPro V 1.171.41.115a.<sup>21</sup> The structure was solved by direct methods using SHELXT<sup>22</sup> and refined by full-matrix least-squares on  $F^2$  with anisotropic displacement parameters for the non-hydrogen atoms using SHELXL-2018/3.<sup>23</sup> Structure analysis was aided by use of the programs PLATON<sup>24</sup> and OLEX2.<sup>25</sup> The hydrogen atoms on the carbon atoms were calculated in ideal positions with isotropic displacement parameters set to  $1.2 \times U_{eq}$  of the attached atom ( $1.5 \times U_{eq}$  for methyl hydrogen atoms). The absolute configuration was determined using the method of Flack<sup>26</sup> and confirmed using the Hooft  $y$ -parameter method, which resulted in a Hooft  $y$ -parameter of 0.01(1).<sup>27</sup>

The function,  $\sum w(|F_o|^2 - |F_c|^2)^2$ , was minimized, where  $w = 1/[(\sigma(F_o))^2 + (0.0715 \times P)^2 + (1.6689 \times P)]$  and  $P = (|F_o|^2 + 2|F_c|^2)/3$ .  $R_w(F^2)$  refined to 0.131, with  $R(F) = 0.0484$  and a goodness of fit  $S = 1.04$ . Definitions used for calculating  $R(F)$ ,  $R_w(F^2)$  and the goodness of fit  $S$  are given below.<sup>28</sup> The data were checked for secondary extinction effects, but no correction was necessary. Neutral atom scattering factors and values used to calculate the linear absorption coefficient are from the International Tables for X-ray Crystallography (1992).<sup>29</sup> All figures were generated using SHELXTL/PC.<sup>30</sup> Tables of positional and thermal parameters, bond lengths and angles, torsion angles and figures are found below. The structure was deposited with the Cambridge Crystallographic Database (CCDC: 226136).

**Table S3. Crystal data and structure refinement for 4d**

|                                   |                                                    |                  |
|-----------------------------------|----------------------------------------------------|------------------|
| Empirical formula                 | C <sub>22</sub> H <sub>36</sub> BNO <sub>4</sub> S |                  |
| Formula weight                    | 421.39                                             |                  |
| Temperature                       | 100.02(13) K                                       |                  |
| Wavelength                        | 1.54184 Å                                          |                  |
| Crystal system                    | monoclinic                                         |                  |
| Space group                       | P 1 21 1                                           |                  |
| Unit cell dimensions              | a = 6.45491(9) Å                                   | α = 90°          |
|                                   | b = 23.0622(3) Å                                   | β = 98.2351(13)° |
|                                   | c = 15.8936(2) Å                                   | γ = 90°          |
| Volume                            | 2341.59(6) Å <sup>3</sup>                          |                  |
| Z                                 | 4                                                  |                  |
| Density (calculated)              | 1.195 Mg/m <sup>3</sup>                            |                  |
| Absorption coefficient            | 1.435 mm <sup>-1</sup>                             |                  |
| F(000)                            | 912                                                |                  |
| Crystal size                      | 0.428 × 0.22 × 0.111 mm <sup>3</sup>               |                  |
| Theta range for data collection   | 2.809 to 77.263°                                   |                  |
| Index ranges                      | -8 ≤ h ≤ 8, -28 ≤ k ≤ 28, -19 ≤ l ≤ 15             |                  |
| Reflections collected             | 31964                                              |                  |
| Independent reflections           | 9354 [R(int) = 0.0380]                             |                  |
| Completeness to theta = 67.684°   | 99.9%                                              |                  |
| Absorption correction             | Gaussian and multi-scan                            |                  |
| Max. and min. transmission        | 1.000 and 0.373                                    |                  |
| Refinement method                 | Full-matrix least-squares on F <sup>2</sup>        |                  |
| Data / restraints / parameters    | 9354 / 1 / 541                                     |                  |
| Goodness-of-fit on F <sup>2</sup> | 1.038                                              |                  |
| Final R indices [I > 2σ(I)]       | R1 = 0.0484, wR2 = 0.1298                          |                  |
| R indices (all data)              | R1 = 0.0495, wR2 = 0.1306                          |                  |
| Absolute structure parameter      | 0.005(13)                                          |                  |
| Extinction coefficient            | n/a                                                |                  |
| Largest diff. peak and hole       | 0.680 and -0.302 e.Å <sup>-3</sup>                 |                  |

**Table S4. Atomic coordinates ( $\times 10^4$ ) and equivalent isotropic displacement parameters ( $\text{\AA}^2 \times 10^3$ ) for 4d; U(eq) is defined as one third of the trace of the orthogonalized  $U^{ij}$  tensor**

|     | x        | y       | z       | U(eq) |
|-----|----------|---------|---------|-------|
| S1  | 2175(2)  | 6730(1) | 4042(1) | 41(1) |
| O1  | 8747(4)  | 4381(1) | 4567(1) | 23(1) |
| O2  | 11070(4) | 3718(1) | 5093(2) | 26(1) |
| O3  | 9364(4)  | 3535(1) | 6375(2) | 22(1) |
| O4  | 12192(4) | 4163(1) | 6515(2) | 24(1) |
| N1  | 10203(5) | 3789(1) | 3663(2) | 24(1) |
| C1  | 10021(5) | 3952(2) | 4449(2) | 21(1) |
| C2  | 8998(5)  | 4518(2) | 5501(2) | 21(1) |
| C3  | 6838(5)  | 4639(2) | 5729(2) | 22(1) |
| C4  | 5754(5)  | 5164(2) | 5282(2) | 21(1) |
| C5  | 3715(6)  | 5124(2) | 4879(2) | 24(1) |
| C6  | 2644(6)  | 5604(2) | 4523(2) | 27(1) |
| C7  | 3633(6)  | 6143(2) | 4544(2) | 26(1) |
| C8  | 5692(6)  | 6187(2) | 4927(2) | 28(1) |
| C9  | 6734(6)  | 5701(2) | 5296(2) | 26(1) |
| C10 | 10957(6) | 3294(2) | 7002(2) | 31(1) |
| C11 | 12285(7) | 3835(2) | 7296(2) | 32(1) |
| C12 | 9027(6)  | 4095(2) | 2925(2) | 29(1) |
| C13 | 10480(8) | 4488(2) | 2511(3) | 38(1) |
| C14 | 7861(7)  | 3668(2) | 2291(2) | 42(1) |
| C15 | 11753(6) | 3333(2) | 3519(2) | 29(1) |

|     |          |         |          |       |
|-----|----------|---------|----------|-------|
| C16 | 11114(7) | 2742(2) | 3836(3)  | 35(1) |
| C17 | 13976(6) | 3501(2) | 3875(3)  | 36(1) |
| C18 | 3359(7)  | 7356(2) | 4585(3)  | 33(1) |
| C19 | 9954(7)  | 2980(2) | 7661(3)  | 34(1) |
| C20 | 12283(7) | 2852(2) | 6567(3)  | 33(1) |
| C21 | 11233(8) | 4191(2) | 7938(3)  | 38(1) |
| C22 | 14542(6) | 3742(2) | 7647(3)  | 35(1) |
| B1  | 10354(6) | 3990(2) | 5975(2)  | 20(1) |
| S2  | 13076(2) | 3233(1) | 886(1)   | 38(1) |
| O5  | 6684(4)  | 5631(1) | 389(1)   | 23(1) |
| O6  | 4271(4)  | 6279(1) | -117(1)  | 25(1) |
| O7  | 5502(4)  | 6488(1) | -1505(2) | 23(1) |
| O8  | 3170(4)  | 5732(1) | -1439(1) | 22(1) |
| N2  | 4982(5)  | 6141(1) | 1307(2)  | 23(1) |
| C23 | 5281(5)  | 6023(2) | 517(2)   | 21(1) |
| C24 | 6884(5)  | 5621(2) | -542(2)  | 21(1) |
| C25 | 6824(6)  | 5000(2) | -829(2)  | 24(1) |
| C26 | 8380(6)  | 4581(2) | -351(2)  | 22(1) |
| C27 | 10479(6) | 4725(2) | -93(2)   | 25(1) |
| C28 | 11880(6) | 4309(2) | 280(2)   | 26(1) |
| C29 | 11229(6) | 3747(2) | 407(2)   | 25(1) |
| C30 | 9113(6)  | 3604(2) | 163(2)   | 27(1) |
| C31 | 7742(6)  | 4022(2) | -204(2)  | 26(1) |
| C32 | 3670(6)  | 6612(2) | -2109(2) | 24(1) |
| C33 | 2674(6)  | 6000(2) | -2264(2) | 23(1) |
| C34 | 6163(6)  | 5826(2) | 2037(2)  | 28(1) |

|     |          |         |          |       |
|-----|----------|---------|----------|-------|
| C35 | 4734(8)  | 5409(2) | 2413(3)  | 42(1) |
| C36 | 7228(7)  | 6245(2) | 2706(2)  | 39(1) |
| C37 | 3369(6)  | 6576(2) | 1463(2)  | 27(1) |
| C38 | 1164(6)  | 6390(2) | 1072(3)  | 36(1) |
| C39 | 3924(7)  | 7180(2) | 1190(3)  | 33(1) |
| C40 | 12040(7) | 2560(2) | 436(3)   | 38(1) |
| C41 | 2267(6)  | 7028(2) | -1696(2) | 29(1) |
| C42 | 4377(7)  | 6896(2) | -2883(3) | 35(1) |
| C43 | 3714(6)  | 5651(2) | -2905(2) | 31(1) |
| C44 | 312(6)   | 5999(2) | -2517(2) | 33(1) |
| B2  | 4954(6)  | 6018(2) | -1002(2) | 20(1) |

---

**Table S5. Bond lengths [Å] for 4d**

|          |          |        |          |          |          |
|----------|----------|--------|----------|----------|----------|
| S1-C7    | 1.773(4) | N1-C12 | 1.482(5) | C5-C6    | 1.383(5) |
| S1-C18   | 1.795(4) | N1-C15 | 1.492(5) | C6-H6    | 0.9500   |
| O1-C1    | 1.318(4) | C2-H2  | 1.0000   | C6-C7    | 1.395(5) |
| O1-C2    | 1.503(4) | C2-C3  | 1.516(5) | C7-C8    | 1.384(5) |
| O2-C1    | 1.264(4) | C2-B1  | 1.619(5) | C8-H8    | 0.9500   |
| O2-B1    | 1.662(4) | C3-H3A | 0.9900   | C8-C9    | 1.393(5) |
| O3-C10   | 1.438(4) | C3-H3B | 0.9900   | C9-H9    | 0.9500   |
| O3-B1    | 1.426(5) | C3-C4  | 1.521(5) | C10-C11  | 1.549(6) |
| O4-C11   | 1.448(4) | C4-C5  | 1.382(5) | C10-C19  | 1.494(5) |
| O4-B1    | 1.418(4) | C4-C9  | 1.390(5) | C10-C20  | 1.554(6) |
| N1-C1    | 1.327(4) | C5-H5  | 0.9500   | C11-C21  | 1.541(6) |
| C12-C13  | 1.519(6) | O5-C23 | 1.316(4) | C35-H35B | 0.9800   |
| C11-C22  | 1.499(6) | O5-C24 | 1.504(4) | C35-H35C | 0.9800   |
| C12-H12  | 1.0000   | O6-C23 | 1.266(4) | C36-H36A | 0.9800   |
| C12-C14  | 1.527(6) | O6-B2  | 1.646(4) | C36-H36B | 0.9800   |
| C13-H13A | 0.9800   | O7-C32 | 1.441(4) | C36-H36C | 0.9800   |
| C13-H13B | 0.9800   | O7-B2  | 1.422(5) | C37-H37  | 1.0000   |

|          |          |          |          |          |          |
|----------|----------|----------|----------|----------|----------|
| C13-H13C | 0.9800   | O8-C33   | 1.444(4) | C37-C38  | 1.530(5) |
| C14-H14A | 0.9800   | O8-B2    | 1.419(4) | C37-C39  | 1.517(6) |
| C14-H14B | 0.9800   | N2-C23   | 1.325(4) | C38-H38A | 0.9800   |
| C14-H14C | 0.9800   | N2-C34   | 1.484(5) | C38-H38B | 0.9800   |
| C15-H15  | 1.0000   | N2-C37   | 1.492(5) | C38-H38C | 0.9800   |
| C15-C16  | 1.529(6) | C24-H24  | 1.0000   | C39-H39A | 0.9800   |
| C15-C17  | 1.516(6) | C24-C25  | 1.503(5) | C39-H39B | 0.9800   |
| C16-H16A | 0.9800   | C24-B2   | 1.632(5) | C39-H39C | 0.9800   |
| C16-H16B | 0.9800   | C25-H25A | 0.9900   | C40-H40A | 0.9800   |
| C16-H16C | 0.9800   | C25-H25B | 0.9900   | C40-H40B | 0.9800   |
| C17-H17A | 0.9800   | C25-C26  | 1.517(5) | C40-H40C | 0.9800   |
| C17-H17B | 0.9800   | C26-C27  | 1.398(5) | C41-H41A | 0.9800   |
| C17-H17C | 0.9800   | C26-C31  | 1.384(5) | C41-H41B | 0.9800   |
| C18-H18A | 0.9800   | C27-H27  | 0.9500   | C41-H41C | 0.9800   |
| C18-H18B | 0.9800   | C27-C28  | 1.391(5) | C42-H42A | 0.9800   |
| C18-H18C | 0.9800   | C28-H28  | 0.9500   | C42-H42B | 0.9800   |
| C19-H19A | 0.9800   | C28-C29  | 1.387(5) | C42-H42C | 0.9800   |
| C19-H19B | 0.9800   | C29-C30  | 1.405(5) | C43-H43A | 0.9800   |
| C19-H19C | 0.9800   | C30-H30  | 0.9500   | C43-H43B | 0.9800   |
| C20-H20A | 0.9800   | C30-C31  | 1.381(5) | C43-H43C | 0.9800   |
| C20-H20B | 0.9800   | C31-H31  | 0.9500   | C44-H44A | 0.9800   |
| C20-H20C | 0.9800   | C32-C33  | 1.557(5) | C44-H44B | 0.9800   |
| C21-H21A | 0.9800   | C32-C41  | 1.530(5) | C44-H44C | 0.9800   |
| C21-H21B | 0.9800   | C32-C42  | 1.519(5) |          |          |
| C21-H21C | 0.9800   | C33-C43  | 1.526(5) |          |          |
| C22-H22A | 0.9800   | C33-C44  | 1.520(5) |          |          |
| C22-H22B | 0.9800   | C34-H34  | 1.0000   |          |          |
| C22-H22C | 0.9800   | C34-C35  | 1.513(6) |          |          |
| S2-C29   | 1.773(4) | C34-C36  | 1.526(6) |          |          |
| S2-C40   | 1.797(4) | C35-H35A | 0.9800   |          |          |

---



**Table S6. Bond angles [°] for 4d**

|              |            |               |          |               |          |
|--------------|------------|---------------|----------|---------------|----------|
| C7-S1-C18    | 103.67(18) | C8-C7-C6      | 118.9(3) | H14A-C14-H14B | 109.5    |
| C1-O1-C2     | 108.4(2)   | C7-C8-H8      | 120.0    | H14A-C14-H14C | 109.5    |
| C1-O2-B1     | 109.8(3)   | C7-C8-C9      | 120.1(3) | H14B-C14-H14C | 109.5    |
| B1-O3-C10    | 105.8(3)   | C9-C8-H8      | 120.0    | N1-C15-H15    | 106.6    |
| B1-O4-C11    | 107.5(3)   | C4-C9-C8      | 121.3(3) | N1-C15-C16    | 111.0(3) |
| C1-N1-C12    | 120.4(3)   | C4-C9-H9      | 119.4    | N1-C15-C17    | 112.5(3) |
| C1-N1-C15    | 119.7(3)   | C8-C9-H9      | 119.4    | C16-C15-H15   | 106.6    |
| C12-N1-C15   | 119.6(3)   | O3-C10-C11    | 102.0(3) | C17-C15-H15   | 106.6    |
| O1-C1-N1     | 119.2(3)   | O3-C10-C19    | 109.5(3) | C17-C15-C16   | 113.0(4) |
| O2-C1-O1     | 118.6(3)   | O3-C10-C20    | 109.2(3) | C15-C16-H16A  | 109.5    |
| O2-C1-N1     | 122.1(3)   | C11-C10-C20   | 110.3(3) | C15-C16-H16B  | 109.5    |
| O1-C2-H2     | 108.0      | C19-C10-C11   | 117.1(3) | C15-C16-H16C  | 109.5    |
| O1-C2-C3     | 107.5(3)   | C19-C10-C20   | 108.5(3) | H16A-C16-H16B | 109.5    |
| O1-C2-B1     | 106.1(3)   | O4-C11-C10    | 102.1(3) | H16A-C16-H16C | 109.5    |
| C3-C2-H2     | 108.0      | O4-C11-C21    | 108.8(3) | H16B-C16-H16C | 109.5    |
| C3-C2-B1     | 118.8(3)   | O4-C11-C22    | 108.2(3) | C15-C17-H17A  | 109.5    |
| B1-C2-H2     | 108.0      | C21-C11-C10   | 110.6(3) | C15-C17-H17B  | 109.5    |
| C2-C3-H3A    | 108.7      | C22-C11-C10   | 117.5(4) | C15-C17-H17C  | 109.5    |
| C2-C3-H3B    | 108.7      | C22-C11-C21   | 109.1(3) | H17A-C17-H17B | 109.5    |
| C2-C3-C4     | 114.4(3)   | N1-C12-H12    | 107.6    | H17A-C17-H17C | 109.5    |
| H3A-C3-H3B   | 107.6      | N1-C12-C13    | 110.4(3) | H17B-C17-H17C | 109.5    |
| C4-C3-H3A    | 108.7      | N1-C12-C14    | 111.3(3) | S1-C18-H18A   | 109.5    |
| C4-C3-H3B    | 108.7      | C13-C12-H12   | 107.6    | S1-C18-H18B   | 109.5    |
| C5-C4-C3     | 120.5(3)   | C13-C12-C14   | 112.1(3) | S1-C18-H18C   | 109.5    |
| C5-C4-C9     | 117.9(3)   | C14-C12-H12   | 107.6    | H18A-C18-H18B | 109.5    |
| C9-C4-C3     | 121.6(3)   | C12-C13-H13A  | 109.5    | H18A-C18-H18C | 109.5    |
| C4-C5-H5     | 119.2      | C12-C13-H13B  | 109.5    | H18B-C18-H18C | 109.5    |
| C4-C5-C6     | 121.5(3)   | C12-C13-H13C  | 109.5    | C10-C19-H19A  | 109.5    |
| C6-C5-H5     | 119.2      | H13A-C13-H13B | 109.5    | C10-C19-H19B  | 109.5    |
| C5-C6-H6     | 119.9      | H13A-C13-H13C | 109.5    | C10-C19-H19C  | 109.5    |
| C5-C6-C7     | 120.2(3)   | H13B-C13-H13C | 109.5    | H19A-C19-H19B | 109.5    |
| C7-C6-H6     | 119.9      | C12-C14-H14A  | 109.5    | H19A-C19-H19C | 109.5    |
| C6-C7-S1     | 117.3(3)   | C12-C14-H14B  | 109.5    | H19B-C19-H19C | 109.5    |
| C8-C7-S1     | 123.8(3)   | C12-C14-H14C  | 109.5    | C10-C20-H20A  | 109.5    |
| C10-C20-H20B | 109.5      | C25-C24-O5    | 108.1(3) | O8-C33-C44    | 108.9(3) |
| C10-C20-H20C | 109.5      | C25-C24-H24   | 109.6    | C43-C33-C32   | 111.8(3) |

|               |            |               |          |               |          |
|---------------|------------|---------------|----------|---------------|----------|
| H20A-C20-H20B | 109.5      | C25-C24-B2    | 114.4(3) | C44-C33-C32   | 114.8(3) |
| H20A-C20-H20C | 109.5      | B2-C24-H24    | 109.6    | C44-C33-C43   | 110.1(3) |
| H20B-C20-H20C | 109.5      | C24-C25-H25A  | 107.8    | N2-C34-H34    | 107.9    |
| C11-C21-H21A  | 109.5      | C24-C25-H25B  | 107.8    | N2-C34-C35    | 110.2(3) |
| C11-C21-H21B  | 109.5      | C24-C25-C26   | 118.0(3) | N2-C34-C36    | 111.3(3) |
| C11-C21-H21C  | 109.5      | H25A-C25-H25B | 107.2    | C35-C34-H34   | 107.9    |
| H21A-C21-H21B | 109.5      | C26-C25-H25A  | 107.8    | C35-C34-C36   | 111.5(3) |
| H21A-C21-H21C | 109.5      | C26-C25-H25B  | 107.8    | C36-C34-H34   | 107.9    |
| H21B-C21-H21C | 109.5      | C27-C26-C25   | 122.7(3) | C34-C35-H35A  | 109.5    |
| C11-C22-H22A  | 109.5      | C31-C26-C25   | 119.1(3) | C34-C35-H35B  | 109.5    |
| C11-C22-H22B  | 109.5      | C31-C26-C27   | 118.1(3) | C34-C35-H35C  | 109.5    |
| C11-C22-H22C  | 109.5      | C26-C27-H27   | 119.8    | H35A-C35-H35B | 109.5    |
| H22A-C22-H22B | 109.5      | C28-C27-C26   | 120.3(3) | H35A-C35-H35C | 109.5    |
| H22A-C22-H22C | 109.5      | C28-C27-H27   | 119.8    | H35B-C35-H35C | 109.5    |
| H22B-C22-H22C | 109.5      | C27-C28-H28   | 119.5    | C34-C36-H36A  | 109.5    |
| O3-B1-O2      | 107.0(3)   | C29-C28-C27   | 121.0(3) | C34-C36-H36B  | 109.5    |
| O3-B1-C2      | 120.9(3)   | C29-C28-H28   | 119.5    | C34-C36-H36C  | 109.5    |
| O4-B1-O2      | 107.9(3)   | C28-C29-S2    | 119.2(3) | H36A-C36-H36B | 109.5    |
| O4-B1-O3      | 109.1(3)   | C28-C29-C30   | 118.8(3) | H36A-C36-H36C | 109.5    |
| O4-B1-C2      | 114.8(3)   | C30-C29-S2    | 121.9(3) | H36B-C36-H36C | 109.5    |
| C2-B1-O2      | 95.1(2)    | C29-C30-H30   | 120.3    | N2-C37-H37    | 106.7    |
| C29-S2-C40    | 102.54(19) | C31-C30-C29   | 119.4(3) | N2-C37-C38    | 112.0(3) |
| C23-O5-C24    | 108.7(3)   | C31-C30-H30   | 120.3    | N2-C37-C39    | 111.7(3) |
| C23-O6-B2     | 109.9(3)   | C26-C31-H31   | 118.9    | C38-C37-H37   | 106.7    |
| B2-O7-C32     | 106.3(3)   | C30-C31-C26   | 122.3(4) | C39-C37-H37   | 106.7    |
| B2-O8-C33     | 107.7(3)   | C30-C31-H31   | 118.9    | C39-C37-C38   | 112.6(3) |
| C23-N2-C34    | 120.8(3)   | O7-C32-C33    | 101.9(3) | C37-C38-H38A  | 109.5    |
| C23-N2-C37    | 119.7(3)   | O7-C32-C41    | 108.5(3) | C37-C38-H38B  | 109.5    |
| C34-N2-C37    | 119.5(3)   | O7-C32-C42    | 108.2(3) | C37-C38-H38C  | 109.5    |
| O5-C23-N2     | 119.0(3)   | C41-C32-C33   | 112.3(3) | H38A-C38-H38B | 109.5    |
| O6-C23-O5     | 119.0(3)   | C42-C32-C33   | 115.3(3) | H38A-C38-H38C | 109.5    |
| O6-C23-N2     | 122.0(3)   | C42-C32-C41   | 110.1(3) | H38B-C38-H38C | 109.5    |
| O5-C24-H24    | 109.6      | O8-C33-C32    | 102.2(3) | C37-C39-H39A  | 109.5    |
| O5-C24-B2     | 105.4(2)   | O8-C33-C43    | 108.6(3) | C37-C39-H39B  | 109.5    |
| C37-C39-H39C  | 109.5      | O8-B2-O6      | 106.9(3) | C24-B2-O6     | 95.9(2)  |
| H39A-C39-H39B | 109.5      | O8-B2-O7      | 109.2(3) | H39B-C39-H39C | 109.5    |
| H39A-C39-H39C | 109.5      | O8-B2-C24     | 118.2(3) | S2-C40-H40A   | 109.5    |

|               |          |
|---------------|----------|
| S2-C40-H40B   | 109.5    |
| S2-C40-H40C   | 109.5    |
| H40A-C40-H40B | 109.5    |
| H40A-C40-H40C | 109.5    |
| H40B-C40-H40C | 109.5    |
| C32-C41-H41A  | 109.5    |
| C32-C41-H41B  | 109.5    |
| C32-C41-H41C  | 109.5    |
| H41A-C41-H41B | 109.5    |
| H41A-C41-H41C | 109.5    |
| H41B-C41-H41C | 109.5    |
| C32-C42-H42A  | 109.5    |
| C32-C42-H42B  | 109.5    |
| C32-C42-H42C  | 109.5    |
| H42A-C42-H42B | 109.5    |
| H42A-C42-H42C | 109.5    |
| H42B-C42-H42C | 109.5    |
| C33-C43-H43A  | 109.5    |
| C33-C43-H43B  | 109.5    |
| C33-C43-H43C  | 109.5    |
| H43A-C43-H43B | 109.5    |
| H43A-C43-H43C | 109.5    |
| H43B-C43-H43C | 109.5    |
| C33-C44-H44A  | 109.5    |
| C33-C44-H44B  | 109.5    |
| C33-C44-H44C  | 109.5    |
| H44A-C44-H44B | 109.5    |
| H44A-C44-H44C | 109.5    |
| H44B-C44-H44C | 109.5    |
| O7-B2-O6      | 108.6(3) |
| O7-B2-C24     | 116.4(3) |

---

**Table S7. Anisotropic displacement parameters ( $\text{\AA}^2 \times 10^3$ ) for 4d; the anisotropic displacement factor exponent takes the form:  $-2\pi^2[h^2a^{*2}U^{11} + \dots + 2hka^*b^*U^{12}]$**

|     | U <sup>11</sup> | U <sup>22</sup> | U <sup>33</sup> | U <sup>23</sup> | U <sup>13</sup> | U <sup>12</sup> |
|-----|-----------------|-----------------|-----------------|-----------------|-----------------|-----------------|
| S1  | 51(1)           | 24(1)           | 41(1)           | 0(1)            | -21(1)          | 7(1)            |
| O1  | 30(1)           | 26(1)           | 12(1)           | -1(1)           | 3(1)            | 5(1)            |
| O2  | 36(1)           | 27(1)           | 15(1)           | -2(1)           | 4(1)            | 8(1)            |
| O3  | 21(1)           | 23(1)           | 21(1)           | 2(1)            | 0(1)            | 1(1)            |
| O4  | 29(1)           | 24(1)           | 18(1)           | 4(1)            | -1(1)           | -6(1)           |
| N1  | 32(2)           | 25(2)           | 14(1)           | -2(1)           | 4(1)            | -2(1)           |
| C1  | 26(2)           | 21(2)           | 16(2)           | -3(1)           | 4(1)            | -4(1)           |
| C2  | 31(2)           | 20(2)           | 12(1)           | -3(1)           | 4(1)            | 0(1)            |
| C3  | 29(2)           | 21(2)           | 17(1)           | 2(1)            | 7(1)            | 4(1)            |
| C4  | 29(2)           | 21(2)           | 14(1)           | -2(1)           | 6(1)            | 3(1)            |
| C5  | 30(2)           | 23(2)           | 22(2)           | -3(1)           | 6(1)            | -1(1)           |
| C6  | 30(2)           | 28(2)           | 21(2)           | -3(1)           | 0(1)            | 0(1)            |
| C7  | 36(2)           | 22(2)           | 16(2)           | 1(1)            | -4(1)           | 7(1)            |
| C8  | 35(2)           | 21(2)           | 27(2)           | -1(1)           | -2(2)           | -3(1)           |
| C9  | 31(2)           | 26(2)           | 21(2)           | -2(1)           | -2(1)           | 3(2)            |
| C10 | 30(2)           | 33(2)           | 28(2)           | 9(2)            | -2(1)           | -1(2)           |
| C11 | 38(2)           | 31(2)           | 24(2)           | 6(2)            | -3(2)           | -5(2)           |
| C12 | 35(2)           | 37(2)           | 14(2)           | -1(1)           | 0(1)            | 0(2)            |
| C13 | 56(3)           | 34(2)           | 25(2)           | 2(2)            | 10(2)           | -6(2)           |
| C14 | 48(2)           | 60(3)           | 16(2)           | -5(2)           | -1(2)           | -19(2)          |
| C15 | 38(2)           | 30(2)           | 20(2)           | -8(1)           | 12(1)           | -1(2)           |

|     |       |       |       |       |        |       |
|-----|-------|-------|-------|-------|--------|-------|
| C16 | 47(2) | 28(2) | 31(2) | -9(2) | 13(2)  | -2(2) |
| C17 | 35(2) | 37(2) | 40(2) | -7(2) | 16(2)  | 2(2)  |
| C18 | 38(2) | 24(2) | 37(2) | 3(2)  | -1(2)  | 1(2)  |
| C19 | 41(2) | 33(2) | 28(2) | 8(2)  | 1(2)   | -6(2) |
| C20 | 38(2) | 28(2) | 34(2) | 0(2)  | 1(2)   | 1(2)  |
| C21 | 55(3) | 36(2) | 25(2) | -3(2) | 6(2)   | 2(2)  |
| C22 | 35(2) | 41(2) | 28(2) | 6(2)  | -5(2)  | -4(2) |
| B1  | 27(2) | 19(2) | 15(2) | -3(1) | 6(1)   | -1(1) |
| S2  | 42(1) | 28(1) | 37(1) | 3(1)  | -13(1) | 7(1)  |
| O5  | 30(1) | 24(1) | 14(1) | -2(1) | 3(1)   | 4(1)  |
| O6  | 34(1) | 26(1) | 14(1) | -4(1) | 1(1)   | 8(1)  |
| O7  | 30(1) | 20(1) | 19(1) | -1(1) | 2(1)   | -1(1) |
| O8  | 29(1) | 20(1) | 16(1) | 2(1)  | 1(1)   | -1(1) |
| N2  | 27(2) | 28(2) | 14(1) | -4(1) | 2(1)   | -2(1) |
| C23 | 25(2) | 20(2) | 16(2) | -3(1) | 2(1)   | -2(1) |
| C24 | 28(2) | 24(2) | 12(1) | -1(1) | 3(1)   | 1(1)  |
| C25 | 32(2) | 22(2) | 18(2) | -2(1) | -2(1)  | 5(1)  |
| C26 | 31(2) | 23(2) | 12(1) | -4(1) | 1(1)   | 4(1)  |
| C27 | 34(2) | 21(2) | 21(2) | -2(1) | 4(1)   | -1(1) |
| C28 | 30(2) | 29(2) | 18(2) | -3(1) | 1(1)   | 0(1)  |
| C29 | 35(2) | 24(2) | 15(2) | 1(1)  | -1(1)  | 7(1)  |
| C30 | 35(2) | 24(2) | 21(2) | 0(1)  | 0(1)   | 0(1)  |
| C31 | 31(2) | 27(2) | 19(2) | -2(1) | 0(1)   | 2(1)  |
| C32 | 33(2) | 23(2) | 17(2) | 5(1)  | 4(1)   | 5(1)  |
| C33 | 31(2) | 23(2) | 15(2) | 1(1)  | 0(1)   | 2(1)  |
| C34 | 34(2) | 34(2) | 15(2) | 1(1)  | 1(1)   | 1(2)  |

|     |       |       |       |       |       |       |
|-----|-------|-------|-------|-------|-------|-------|
| C35 | 61(3) | 35(2) | 30(2) | 5(2)  | 10(2) | -7(2) |
| C36 | 43(2) | 54(3) | 18(2) | -2(2) | -2(2) | -7(2) |
| C37 | 29(2) | 33(2) | 20(2) | -8(1) | 5(1)  | -1(2) |
| C38 | 28(2) | 47(3) | 32(2) | -6(2) | 8(2)  | 0(2)  |
| C39 | 44(2) | 28(2) | 29(2) | -8(2) | 10(2) | 2(2)  |
| C40 | 38(2) | 23(2) | 51(3) | 6(2)  | 1(2)  | 3(2)  |
| C41 | 39(2) | 27(2) | 22(2) | 1(1)  | 5(1)  | 10(2) |
| C42 | 47(2) | 31(2) | 29(2) | 11(2) | 13(2) | 6(2)  |
| C43 | 42(2) | 32(2) | 18(2) | -4(2) | 5(2)  | 4(2)  |
| C44 | 33(2) | 36(2) | 27(2) | 1(2)  | -4(2) | 4(2)  |
| B2  | 27(2) | 18(2) | 16(2) | -3(1) | 4(1)  | 2(1)  |

---

**Table S8. Hydrogen coordinates ( $\times 10^4$ ) and isotropic displacement parameters ( $\text{\AA}^2 \times 10^3$ ) for 4d**

---

|      | x     | y    | z    | U(eq) |
|------|-------|------|------|-------|
| H2   | 9846  | 4881 | 5599 | 25    |
| H3A  | 6960  | 4699 | 6351 | 26    |
| H3B  | 5948  | 4294 | 5585 | 26    |
| H5   | 3033  | 4758 | 4845 | 29    |
| H6   | 1230  | 5567 | 4264 | 32    |
| H8   | 6395  | 6550 | 4938 | 34    |
| H9   | 8143  | 5737 | 5562 | 32    |
| H12  | 7959  | 4347 | 3142 | 35    |
| H13A | 11086 | 4780 | 2922 | 57    |

|      |       |      |      |    |
|------|-------|------|------|----|
| H13B | 9688  | 4681 | 2018 | 57 |
| H13C | 11604 | 4256 | 2327 | 57 |
| H14A | 8874  | 3434 | 2036 | 63 |
| H14B | 6976  | 3883 | 1844 | 63 |
| H14C | 6985  | 3414 | 2587 | 63 |
| H15  | 11706 | 3297 | 2889 | 34 |
| H16A | 12053 | 2443 | 3671 | 52 |
| H16B | 9672  | 2655 | 3584 | 52 |
| H16C | 11206 | 2751 | 4457 | 52 |
| H17A | 14128 | 3507 | 4498 | 55 |
| H17B | 14284 | 3887 | 3667 | 55 |
| H17C | 14953 | 3218 | 3692 | 55 |
| H18A | 2585  | 7705 | 4374 | 50 |
| H18B | 4814  | 7389 | 4481 | 50 |
| H18C | 3323  | 7316 | 5197 | 50 |
| H19A | 9016  | 3245 | 7908 | 52 |
| H19B | 11039 | 2840 | 8110 | 52 |
| H19C | 9149  | 2651 | 7399 | 52 |
| H20A | 11351 | 2572 | 6239 | 50 |
| H20B | 13238 | 2647 | 7003 | 50 |
| H20C | 13095 | 3059 | 6186 | 50 |
| H21A | 11836 | 4582 | 7986 | 58 |
| H21B | 11469 | 4001 | 8495 | 58 |
| H21C | 9726  | 4217 | 7742 | 58 |
| H22A | 14643 | 3470 | 8124 | 53 |
| H22B | 15177 | 4113 | 7844 | 53 |

|      |       |      |       |    |
|------|-------|------|-------|----|
| H22C | 15281 | 3583 | 7201  | 53 |
| H24  | 8247  | 5800 | -631  | 25 |
| H25A | 7031  | 4994 | -1434 | 29 |
| H25B | 5400  | 4849 | -800  | 29 |
| H27  | 10952 | 5108 | -173  | 30 |
| H28  | 13304 | 4412 | 450   | 31 |
| H30  | 8629  | 3222 | 250   | 32 |
| H31  | 6310  | 3923 | -360  | 31 |
| H34  | 7280  | 5593 | 1818  | 33 |
| H35A | 3589  | 5626 | 2610  | 63 |
| H35B | 5532  | 5203 | 2893  | 63 |
| H35C | 4156  | 5128 | 1979  | 63 |
| H36A | 8051  | 6528 | 2434  | 58 |
| H36B | 8154  | 6028 | 3137  | 58 |
| H36C | 6163  | 6448 | 2975  | 58 |
| H37  | 3375  | 6591 | 2092  | 32 |
| H38A | 1037  | 6413 | 451   | 53 |
| H38B | 133   | 6648 | 1273  | 53 |
| H38C | 911   | 5991 | 1241  | 53 |
| H39A | 5347  | 7277 | 1454  | 50 |
| H39B | 2935  | 7461 | 1370  | 50 |
| H39C | 3847  | 7192 | 570   | 50 |
| H40A | 11859 | 2585 | -185  | 57 |
| H40B | 10683 | 2483 | 623   | 57 |
| H40C | 13012 | 2244 | 627   | 57 |
| H41A | 1035  | 7127 | -2106 | 44 |



|      |      |      |       |    |
|------|------|------|-------|----|
| H41B | 3049 | 7382 | -1518 | 44 |
| H41C | 1817 | 6841 | -1199 | 44 |
| H42A | 5436 | 6651 | -3093 | 52 |
| H42B | 4978 | 7277 | -2725 | 52 |
| H42C | 3174 | 6941 | -3330 | 52 |
| H43A | 5235 | 5657 | -2740 | 46 |
| H43B | 3360 | 5823 | -3472 | 46 |
| H43C | 3213 | 5250 | -2916 | 46 |
| H44A | -53  | 6225 | -3039 | 49 |
| H44B | -354 | 6171 | -2060 | 49 |
| H44C | -180 | 5599 | -2615 | 49 |

---

**Table S9. Torsion angles [°] for 4d**

|                |           |                 |           |
|----------------|-----------|-----------------|-----------|
| S1-C7-C8-C9    | -179.0(3) | C1-O1-C2-C3     | -139.9(3) |
| O1-C2-C3-C4    | -62.9(4)  | C1-O1-C2-B1     | -11.8(3)  |
| O1-C2-B1-O2    | 12.8(3)   | C1-O2-B1-O3     | 113.1(3)  |
| O1-C2-B1-O3    | -100.5(3) | C1-O2-B1-O4     | -129.5(3) |
| O1-C2-B1-O4    | 125.2(3)  | C1-O2-B1-C2     | -11.4(3)  |
| O3-C10-C11-O4  | -35.6(4)  | C1-N1-C12-C13   | 104.8(4)  |
| O3-C10-C11-C21 | 80.0(4)   | C1-N1-C12-C14   | -130.2(4) |
| O3-C10-C11-C22 | -153.8(3) | C1-N1-C15-C16   | 68.2(4)   |
| C1-N1-C15-C17  | -59.5(4)  | C20-C10-C11-O4  | 80.3(4)   |
| C2-O1-C1-O2    | 4.1(4)    | C20-C10-C11-C21 | -164.1(3) |
| C2-O1-C1-N1    | -174.2(3) | C20-C10-C11-C22 | -37.9(5)  |
| C2-C3-C4-C5    | 131.0(3)  | B1-O2-C1-O1     | 5.6(4)    |
| C2-C3-C4-C9    | -51.8(4)  | B1-O2-C1-N1     | -176.2(3) |
| C3-C2-B1-O2    | 133.9(3)  | B1-O3-C10-C11   | 33.9(4)   |
| C3-C2-B1-O3    | 20.6(5)   | B1-O3-C10-C19   | 158.6(3)  |
| C3-C2-B1-O4    | -113.7(3) | B1-O3-C10-C20   | -82.7(3)  |
| C3-C4-C5-C6    | 175.2(3)  | B1-O4-C11-C10   | 24.2(4)   |

|                 |           |                 |           |
|-----------------|-----------|-----------------|-----------|
| C3-C4-C9-C8     | -176.4(3) | B1-O4-C11-C21   | -92.8(4)  |
| C4-C5-C6-C7     | 1.8(5)    | B1-O4-C11-C22   | 148.8(3)  |
| C5-C4-C9-C8     | 0.9(5)    | B1-C2-C3-C4     | 176.8(3)  |
| C5-C6-C7-S1     | 178.0(3)  | S2-C29-C30-C31  | 179.7(3)  |
| C5-C6-C7-C8     | -0.2(5)   | O5-C24-C25-C26  | -54.8(4)  |
| C6-C7-C8-C9     | -1.0(6)   | O5-C24-B2-O6    | 10.2(3)   |
| C7-C8-C9-C4     | 0.6(6)    | O5-C24-B2-O7    | 124.4(3)  |
| C9-C4-C5-C6     | -2.2(5)   | O5-C24-B2-O8    | -102.5(3) |
| C10-O3-B1-O2    | 96.3(3)   | O7-C32-C33-O8   | 34.5(3)   |
| C10-O3-B1-O4    | -20.2(4)  | O7-C32-C33-C43  | -81.6(3)  |
| C10-O3-B1-C2    | -156.7(3) | O7-C32-C33-C44  | 152.2(3)  |
| C11-O4-B1-O2    | -119.8(3) | C23-O5-C24-C25  | -133.0(3) |
| C11-O4-B1-O3    | -3.9(4)   | C23-O5-C24-B2   | -10.3(3)  |
| C11-O4-B1-C2    | 135.6(3)  | C23-O6-B2-O7    | -128.5(3) |
| C12-N1-C1-O1    | 1.4(5)    | C23-O6-B2-O8    | 113.8(3)  |
| C12-N1-C1-O2    | -176.8(3) | C23-O6-B2-C24   | -8.1(3)   |
| C12-N1-C15-C16  | -117.6(4) | C23-N2-C34-C35  | -107.8(4) |
| C12-N1-C15-C17  | 114.7(4)  | C23-N2-C34-C36  | 127.9(4)  |
| C15-N1-C1-O1    | 175.6(3)  | C23-N2-C37-C38  | 62.2(4)   |
| C15-N1-C1-O2    | -2.7(5)   | C23-N2-C37-C39  | -65.2(4)  |
| C15-N1-C12-C13  | -69.4(4)  | C24-O5-C23-O6   | 5.3(4)    |
| C15-N1-C12-C14  | 55.7(5)   | C24-O5-C23-N2   | -174.2(3) |
| C18-S1-C7-C6    | 154.7(3)  | C24-C25-C26-C27 | -42.2(5)  |
| C18-S1-C7-C8    | -27.2(4)  | C24-C25-C26-C31 | 141.6(3)  |
| C19-C10-C11-O4  | -155.1(3) | C25-C24-B2-O6   | 128.7(3)  |
| C19-C10-C11-C21 | -39.5(5)  | C25-C24-B2-O7   | -117.1(3) |
| C19-C10-C11-C22 | 86.7(5)   | C25-C24-B2-O8   | 16.0(4)   |
| C25-C26-C27-C28 | -174.6(3) | B2-O8-C33-C32   | -23.8(3)  |
| C25-C26-C31-C30 | 174.5(3)  | B2-O8-C33-C43   | 94.5(3)   |
| C26-C27-C28-C29 | -0.3(5)   | B2-O8-C33-C44   | -145.7(3) |
| C27-C26-C31-C30 | -1.9(5)   | B2-C24-C25-C26  | -171.8(3) |
| C27-C28-C29-S2  | -179.9(3) | C32-O7-B2-O8    | 19.1(3)   |
| C27-C28-C29-C30 | -0.9(5)   | C32-O7-B2-C24   | 156.2(3)  |
| C28-C29-C30-C31 | 0.7(5)    | C33-O8-B2-O6    | 121.7(3)  |
| C29-C30-C31-C26 | 0.7(5)    | C33-O8-B2-O7    | 4.3(4)    |
| C31-C26-C27-C28 | 1.7(5)    | C33-O8-B2-C24   | -131.8(3) |
| C32-O7-B2-O6    | -97.1(3)  | C34-N2-C23-O5   | -1.7(5)   |

|                 |           |
|-----------------|-----------|
| C34-N2-C23-O6   | 178.9(3)  |
| C34-N2-C37-C38  | -114.9(4) |
| C34-N2-C37-C39  | 117.7(4)  |
| C37-N2-C23-O5   | -178.8(3) |
| C37-N2-C23-O6   | 1.8(5)    |
| C37-N2-C34-C35  | 69.3(4)   |
| C37-N2-C34-C36  | -55.0(4)  |
| C40-S2-C29-C28  | -151.3(3) |
| C40-S2-C29-C30  | 29.8(4)   |
| C41-C32-C33-O8  | -81.4(3)  |
| C41-C32-C33-C43 | 162.5(3)  |
| C41-C32-C33-C44 | 36.2(4)   |
| C42-C32-C33-O8  | 151.4(3)  |
| C42-C32-C33-C43 | 35.3(4)   |
| C42-C32-C33-C44 | -91.0(4)  |
| B2-O6-C23-O5    | 2.5(4)    |
| B2-O6-C23-N2    | -178.1(3) |
| B2-O7-C32-C33   | -32.6(3)  |
| B2-O7-C32-C41   | 86.0(3)   |
| B2-O7-C32-C42   | -154.5(3) |

---

Figure S1. View of molecule 1 in 4d showing the atom labeling scheme; displacement ellipsoids are scaled to the 50% probability level

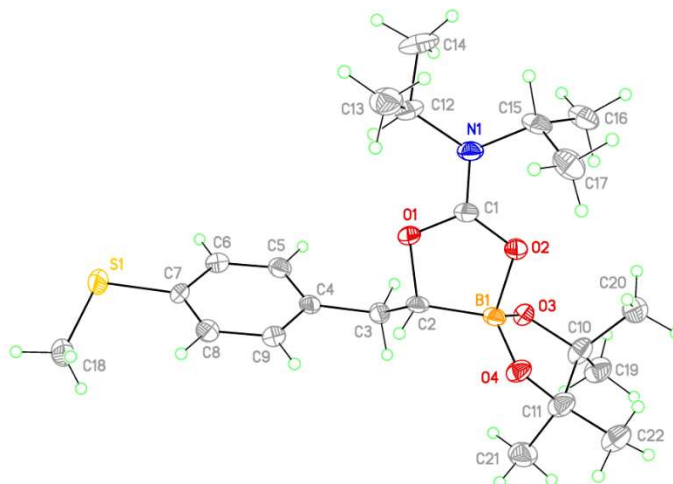

Figure S2. View of molecule 2 in 4d showing the atom labeling scheme; displacement ellipsoids are scaled to the 50% probability level

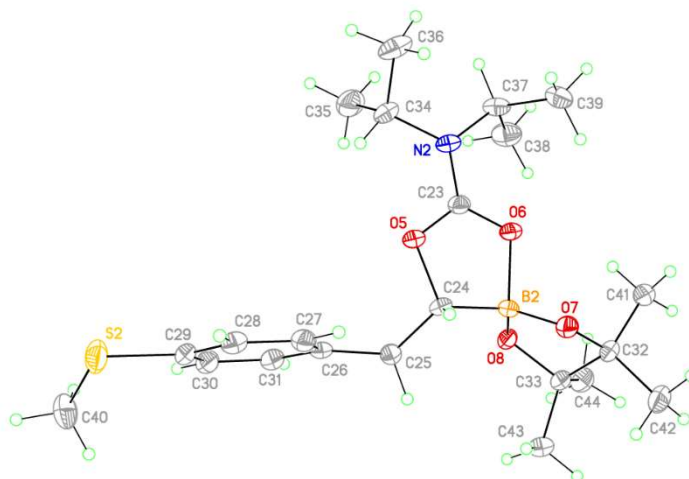

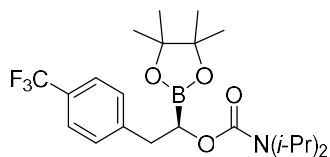

**(R)-1-(4,4,5,5-Tetramethyl-1,3,2-dioxaborolan-2-yl)-2-(4-(trifluoromethyl)phenyl)ethyl diisopropylcarbamate (4e).**

General procedure E was followed on a 101 mg (0.320 mmol) scale of **3e** with 6 mol% of **L6b** and 5 mol% of the catalyst at 35 °C (the reaction was complete in 18 h). Flash chromatography on silica gel (eluting with hexanes/EtOAc = 70:30) afforded 81 mg (57%) of the product as a beige solid. Absolute stereochemistry was assigned by analogy to **4d**.

**<sup>1</sup>H NMR** (400 MHz, CDCl<sub>3</sub>) δ 7.57 – 7.49 (m, 2H), 7.42 – 7.33 (m, 2H), 4.09 (dd, *J* = 10.3, 4.9 Hz, 1H), 4.04 (hept, *J* = 6.8 Hz, 1H), 3.72 (hept, *J* = 6.8 Hz, 1H), 3.09 – 2.93 (m, 2H), 1.25 (d, *J* = 7.0 Hz, 6H), 1.20 (s, 6H), 1.19 (s, 6H), 1.08 (d, *J* = 6.9 Hz, 3H), 1.07 (d, *J* = 6.8 Hz, 3H).

**<sup>13</sup>C NMR** (151 MHz, CDCl<sub>3</sub>) δ 162.73, 145.43, 129.23, 128.28 (q, *J* = 31.8 Hz), 125.19 (q, *J* = 3.8 Hz), 124.55 (q, *J* = 271.2 Hz), 80.11, 48.62, 46.90, 37.79, 25.32, 25.01, 20.54, 20.49, 20.40, 20.34 (the carbon attached to boron was not observed due to quadrupolar relaxation).

**<sup>11</sup>B NMR** (128 MHz, CDCl<sub>3</sub>) δ 12.58.

**<sup>19</sup>F NMR** (376 MHz, CDCl<sub>3</sub>) δ –62.26.

**ESI MS** calcd for C<sub>22</sub>H<sub>34</sub>BF<sub>3</sub>NO<sub>4</sub><sup>+</sup> [M+H]<sup>+</sup> 444.25, found 444.2.

**Chiral HPLC** CHIRALPAK® IA, 0.75% IPA in hexane, 1.0 mL/min, 210 nm: 93% ee

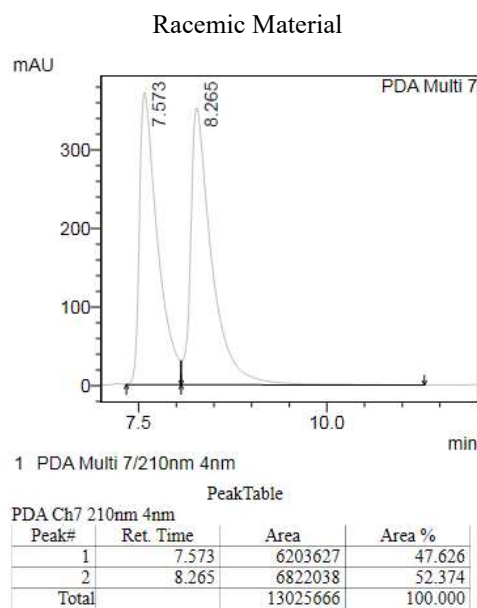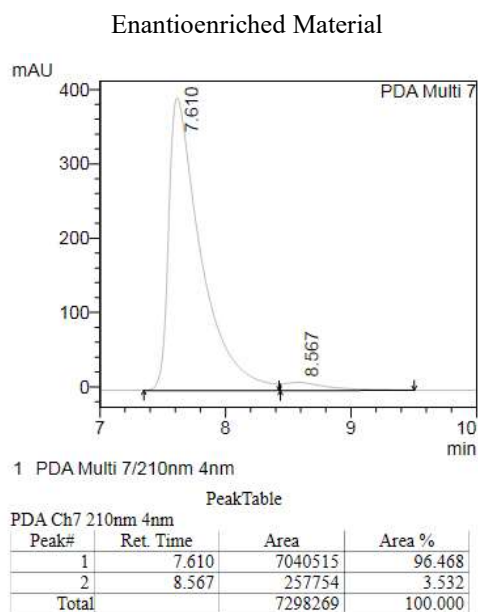

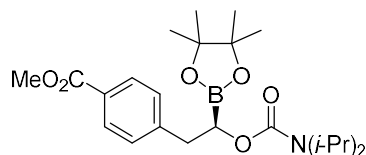

**Methyl (*R*)-4-(2-((diisopropylcarbamoyl)oxy)-2-(4,4,5,5-tetramethyl-1,3,2-dioxaborolan-2-yl)ethyl)benzoate (**4f**).**

General procedure E was followed on a 66 mg (0.22 mmol) scale of **3f** with 12 mol% of **L6b** and 10 mol% of the catalyst at 35 °C (the reaction was complete in 18 h). Flash chromatography on silica gel (eluting with hexanes/EtOAc = 60:40) afforded 42 mg (44%) of the product as a yellow oil. Absolute stereochemistry was assigned by analogy to **4d**.

<sup>1</sup>H NMR (400 MHz, CDCl<sub>3</sub>) δ 7.99 – 7.92 (m, 2H), 7.36 – 7.29 (m, 2H), 4.10 (dd, *J* = 10.2, 5.2 Hz, 1H), 4.06 (hept, *J* = 6.8 Hz, 1H), 3.90 (s, 3H), 3.69 (hept, *J* = 6.8 Hz, 1H), 3.09 – 2.93 (m, 2H), 1.24 (d, *J* = 6.8 Hz, 6H), 1.20 (s, 6H), 1.19 (s, 6H), 1.06 (d, *J* = 6.9 Hz, 6H).

<sup>13</sup>C NMR (151 MHz, CDCl<sub>3</sub>) δ 167.43, 162.79, 146.98, 129.68, 128.99, 127.92, 80.09, 52.12, 48.68, 46.84, 38.04, 25.36, 25.04, 20.59, 20.53, 20.42, 20.35 (the carbon attached to boron was not observed due to quadrupolar relaxation).

<sup>11</sup>B NMR (128 MHz, CDCl<sub>3</sub>) δ 12.59.

ESI MS calcd for C<sub>23</sub>H<sub>37</sub>BNO<sub>6</sub><sup>+</sup> [M+H]<sup>+</sup> 434.27, found 434.2.

Chiral HPLC CHIRALCEL® OD-H, 0.6% IPA in hexane, 1.0 mL/min, 237 nm: 88% ee

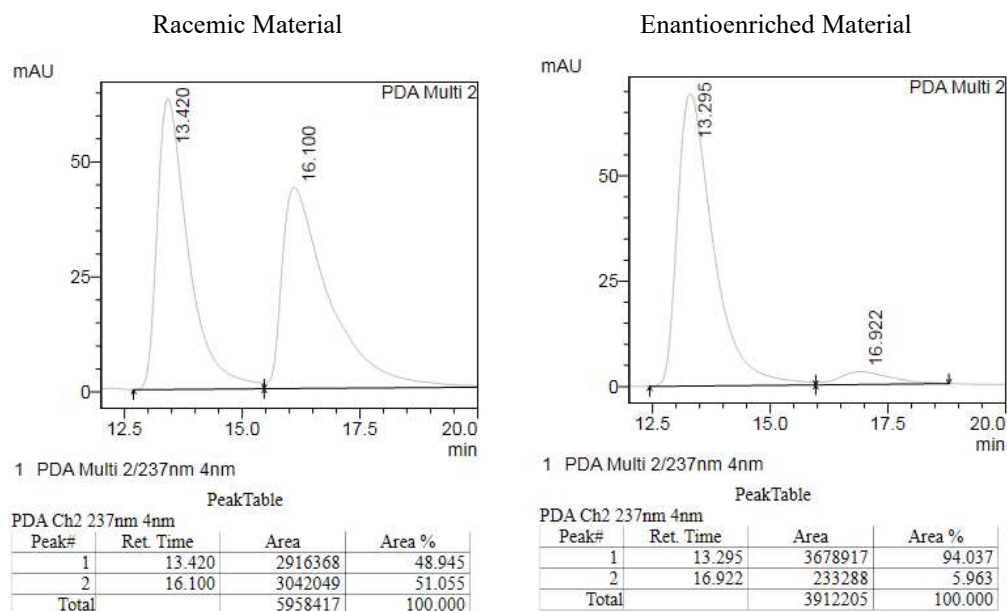

The same reaction was run on a 17 mg (0.056 mmol) scale of **3f-Z**, and it afforded 12 mg (50%) of the product with identical spectral data.

Chiral HPLC CHIRALCEL® OD-H, 0.6% IPA in hexane, 1.0 mL/min, 237 nm: 96% ee

Racemic Material

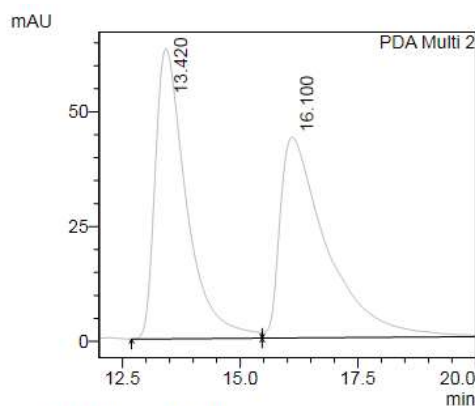

1 PDA Multi 2/237nm 4nm

PeakTable

| Peak# | Ret. Time | Area    | Area %  |
|-------|-----------|---------|---------|
| 1     | 13.420    | 2916368 | 48.945  |
| 2     | 16.100    | 3042049 | 51.055  |
| Total |           | 5958417 | 100.000 |

Enantioenriched Material

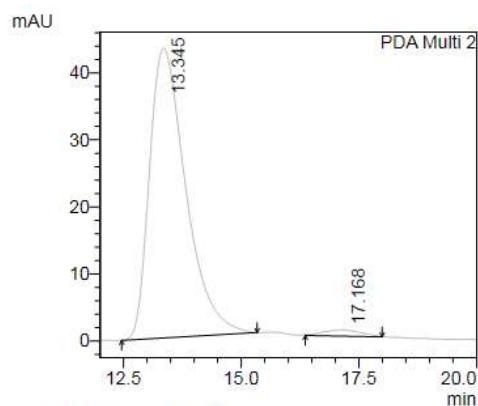

1 PDA Multi 2/237nm 4nm

PeakTable

| Peak# | Ret. Time | Area    | Area %  |
|-------|-----------|---------|---------|
| 1     | 13.345    | 2324433 | 97.865  |
| 2     | 17.168    | 50699   | 2.135   |
| Total |           | 2375133 | 100.000 |

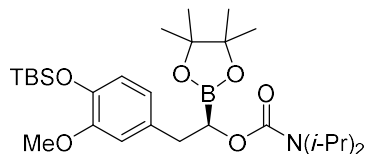

**(R)-2-(4-((tert-Butyldimethylsilyloxy)-3-methoxyphenyl)-1-(4,4,5,5-tetramethyl-1,3,2-dioxaborolan-2-yl)ethyl diisopropylcarbamate (4g).**

General procedure E was followed on a 103 mg (0.253 mmol) scale of **3g** with 6 mol% of **L6b** and 5 mol% of the catalyst at 35 °C (the reaction was complete in 18 h). Flash chromatography on silica gel (eluting with hexanes/EtOAc = 70:30) afforded 60 mg (44%) of the product as a pale-yellow oil. Absolute stereochemistry was assigned by analogy to **4d**.

<sup>1</sup>H NMR (400 MHz, CDCl<sub>3</sub>) δ 6.78 (d, *J* = 2.0 Hz, 1H), 6.75 (d, *J* = 8.0 Hz, 1H), 6.69 (dd, *J* = 8.0, 2.0 Hz, 1H), 4.09 (hept, *J* = 7.0 Hz, 1H), 4.08 (dd, *J* = 9.5, 6.0 Hz, 1H), 3.76 (s, 3H), 3.66 (hept, *J* = 6.9 Hz, 1H), 2.94 – 2.86 (m, 2H), 1.23 (d, *J* = 6.8 Hz, 6H), 1.19 (s, 6H), 1.17 (s, 6H), 1.08 (d, *J* = 6.9 Hz, 3H), 1.07 (d, *J* = 6.8 Hz, 3H), 0.98 (s, 9H), 0.12 (s, 6H).

<sup>13</sup>C NMR (151 MHz, CDCl<sub>3</sub>) δ 162.92, 150.67, 143.01, 134.63, 121.11, 120.70, 112.83, 80.00, 55.48, 48.70, 46.66, 37.49, 25.90, 25.35, 25.05, 20.60, 20.57, 20.40, 20.34, 18.60, -4.57 (the carbon attached to boron was not observed due to quadrupolar relaxation).

<sup>11</sup>B NMR (128 MHz, CDCl<sub>3</sub>) δ 12.73.

ESI MS calcd for C<sub>28</sub>H<sub>51</sub>BNO<sub>6</sub>Si<sup>+</sup> [M+H]<sup>+</sup> 536.36, found 536.3.

Chiral HPLC CHIRALCEL® OD-H, 0.3% IPA in hexane, 1.0 mL/min, 205 nm: 83% ee

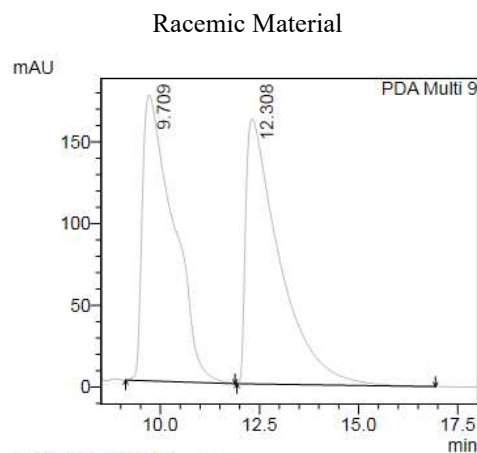

1 PDA Multi 9/205nm 4nm

PeakTable

| Peak# | Ret. Time | Area     | Area %  |
|-------|-----------|----------|---------|
| 1     | 9.709     | 9543777  | 49.907  |
| 2     | 12.308    | 9579320  | 50.093  |
| Total |           | 19123097 | 100.000 |

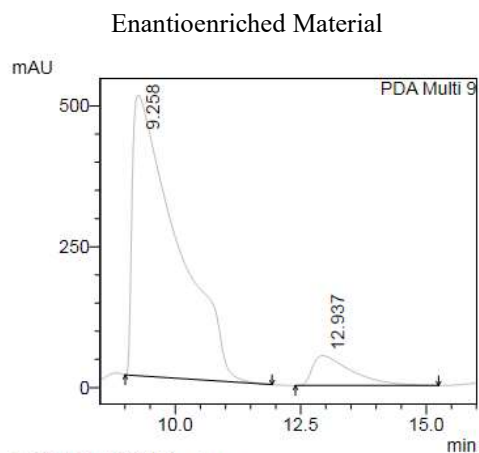

1 PDA Multi 9/205nm 4nm

PeakTable

| Peak# | Ret. Time | Area     | Area %  |
|-------|-----------|----------|---------|
| 1     | 9.258     | 30597085 | 91.387  |
| 2     | 12.937    | 2883866  | 8.613   |
| Total |           | 33480951 | 100.000 |

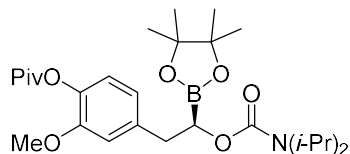

**(R)-4-(2-((Diisopropylcarbamoyl)oxy)-2-(4,4,5,5-tetramethyl-1,3,2-dioxaborolan-2-yl)ethyl)-2-methoxyphenyl pivalate (4h).**

General procedure E was followed on a 115 mg (0.305 mmol) scale of **3h** with 6 mol% of **L6b** and 5 mol% of the catalyst at 35 °C (the reaction was complete in 18 h). Flash chromatography on silica gel (eluting with hexanes/EtOAc = 60:40) afforded 50 mg (33%) of the product as a pale-yellow oil. Absolute stereochemistry was assigned by analogy to **4d**.

<sup>1</sup>H NMR (400 MHz, CDCl<sub>3</sub>) δ 6.89 (d, *J* = 8.1 Hz, 1H), 6.88 (d, *J* = 1.7 Hz, 1H), 6.81 (dd, *J* = 8.0, 1.8 Hz, 1H), 4.10 (dd, *J* = 9.2, 5.8 Hz, 1H), 4.03 (hept, *J* = 6.9 Hz, 1H), 3.77 (s, 3H), 3.73 (hept, *J* = 6.9 Hz, 1H), 3.02 – 2.86 (m, 2H), 1.36 (s, 9H), 1.25 (d, *J* = 6.8 Hz, 6H), 1.21 (s, 6H), 1.20 (s, 6H), 1.10 (d, *J* = 6.8 Hz, 6H).

<sup>13</sup>C NMR (151 MHz, CDCl<sub>3</sub>) δ 177.00, 162.83, 150.92, 139.87, 138.36, 122.28, 121.06, 113.05, 80.10, 55.97, 48.53, 46.92, 39.17, 37.84, 27.38, 25.37, 25.03, 20.59, 20.56, 20.45, 20.40 (the carbon attached to boron was not observed due to quadrupolar relaxation).

<sup>11</sup>B NMR (128 MHz, CDCl<sub>3</sub>) δ 12.68.

ESI MS calcd for C<sub>27</sub>H<sub>45</sub>BNO<sub>7</sub><sup>+</sup> [M+H]<sup>+</sup> 506.33, found 506.4.

Chiral HPLC CHIRALPAK® AD-H, 2.5% IPA in hexane, 1.3 mL/min, 273 nm: 95% ee



Racemic Material

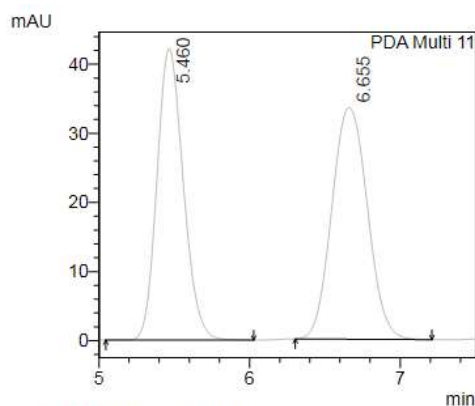

1 PDA Multi 11/273nm 4nm

PeakTable

| Peak# | Ret. Time | Area    | Area %  |
|-------|-----------|---------|---------|
| 1     | 5.460     | 512915  | 48.202  |
| 2     | 6.655     | 551179  | 51.798  |
| Total |           | 1064093 | 100.000 |

Enantioenriched Material

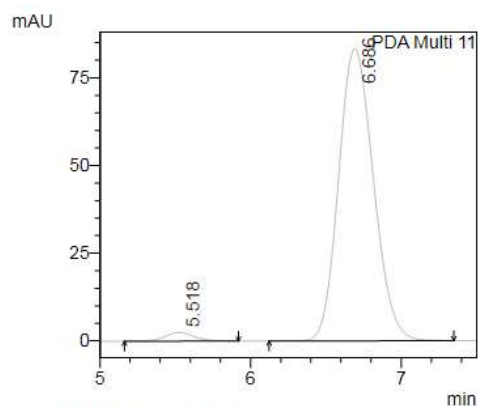

1 PDA Multi 11/273nm 4nm

PeakTable

| Peak# | Ret. Time | Area    | Area %  |
|-------|-----------|---------|---------|
| 1     | 5.518     | 34179   | 2.485   |
| 2     | 6.686     | 1340998 | 97.515  |
| Total |           | 1375177 | 100.000 |

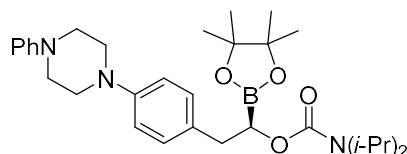

**(R)-2-(4-(4-Phenylpiperazin-1-yl)phenyl)-1-(4,4,5,5-tetramethyl-1,3,2-dioxaborolan-2-yl)ethyl diisopropylcarbamate (4i).**

General procedure E was followed on a 119 mg (0.292 mmol) scale of **3i** with 6 mol% of **L6b** and 5 mol% of the catalyst at 35 °C (the reaction was complete in 18 h). Flash chromatography on silica gel (eluting with hexanes/EtOAc = 60:40) afforded 66 mg (42%) of the product as a beige solid. Absolute stereochemistry was assigned by analogy to **4d**.

<sup>1</sup>H NMR (600 MHz, CDCl<sub>3</sub>) δ 7.29 (dd, *J* = 8.7, 7.3 Hz, 2H), 7.21 – 7.16 (m, 2H), 7.02 – 6.96 (m, 2H), 6.95 – 6.91 (m, 2H), 6.89 (tt, *J* = 7.3, 1.0 Hz, 1H), 4.06 (dd, *J* = 9.8, 5.3 Hz, 1H), 4.03 (hept, *J* = 6.8 Hz, 1H), 3.75 (hept, *J* = 6.8 Hz, 1H), 3.37 – 3.28 (m, 8H), 2.94 – 2.84 (m, 2H), 1.25 (d, *J* = 6.8 Hz, 3H), 1.25 (d, *J* = 6.8 Hz, 3H), 1.20 (s, 6H), 1.18 (s, 6H), 1.10 (d, *J* = 6.8 Hz, 6H).

<sup>13</sup>C NMR (101 MHz, CDCl<sub>3</sub>) δ 162.75, 151.30, 149.41, 132.98, 129.50, 129.18, 120.01, 116.48, 116.32, 79.85, 49.91, 49.46, 48.30, 46.76, 36.91, 25.22, 24.95, 20.51, 20.45, 20.36, 20.30 (the carbon attached to boron was not observed due to quadrupolar relaxation).

<sup>11</sup>B NMR (128 MHz, CDCl<sub>3</sub>) δ 12.88.

ESI MS calcd for C<sub>31</sub>H<sub>47</sub>BN<sub>3</sub>O<sub>4</sub><sup>+</sup> [M+H]<sup>+</sup> 536.37, found 536.3.

Chiral HPLC CHIRALCEL® OZ-3, 1.5% IPA in hexane, 1.0 mL/min, 254 nm: 93% ee

Racemic Material

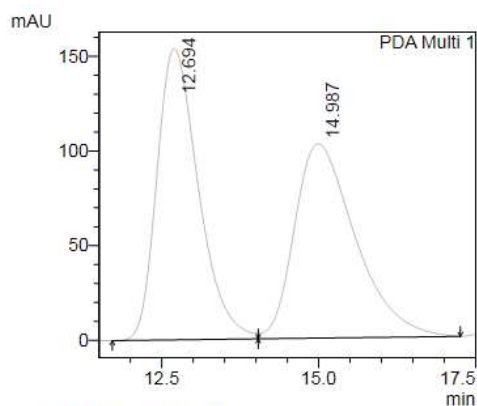

1 PDA Multi 1/254nm 4nm

PeakTable

| Peak# | Ret. Time | Area     | Area %  |
|-------|-----------|----------|---------|
| 1     | 12.694    | 7068501  | 50.506  |
| 2     | 14.987    | 6926835  | 49.494  |
| Total |           | 13995336 | 100.000 |

Enantioenriched Material

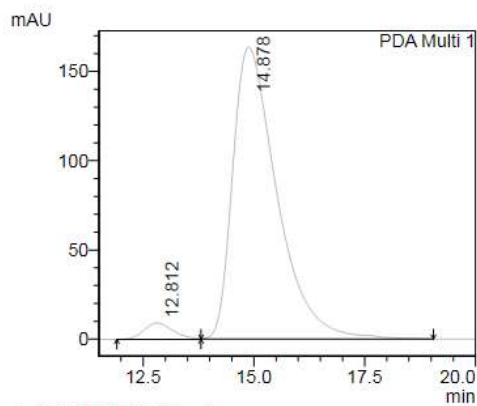

1 PDA Multi 1/254nm 4nm

PeakTable

| Peak# | Ret. Time | Area     | Area %  |
|-------|-----------|----------|---------|
| 1     | 12.812    | 419424   | 3.555   |
| 2     | 14.878    | 11377262 | 96.445  |
| Total |           | 11796685 | 100.000 |

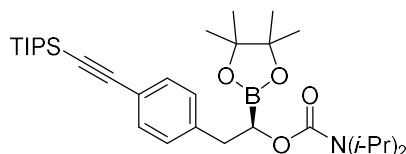

**(R)-1-(4,4,5,5-Tetramethyl-1,3,2-dioxaborolan-2-yl)-2-(4-((triisopropylsilyl)ethynyl)phenyl)ethyl diisopropylcarbamate (4j).**

General procedure E was followed on a 148 mg (0.346 mmol) scale of **3j** with 6 mol% of **L6b** and 5 mol% of the catalyst at 35 °C (the reaction was complete in 18 h). Flash chromatography on silica gel (eluting with hexanes/EtOAc = 70:30) afforded 85 mg (44%) of the product as a pale-yellow oil. Absolute stereochemistry was assigned by analogy to **4d**.

<sup>1</sup>H NMR (400 MHz, CDCl<sub>3</sub>) δ 7.43 – 7.36 (m, 2H), 7.23 – 7.15 (m, 2H), 4.05 (dd, *J* = 9.0, 6.2 Hz, 1H), 4.01 (hept, *J* = 6.8 Hz, 1H), 3.72 (hept, *J* = 6.8 Hz, 1H), 2.98 – 2.90 (m, 2H), 1.25 (d, *J* = 6.8 Hz, 6H), 1.20 (s, 6H), 1.19 (s, 6H), 1.12 (s, 21H), 1.09 (d, *J* = 6.8 Hz, 6H).

<sup>13</sup>C NMR (151 MHz, CDCl<sub>3</sub>) δ 162.81, 141.97, 132.05, 128.78, 120.99, 107.53, 89.70, 80.03, 48.53, 46.91, 37.97, 25.38, 25.05, 20.60, 20.55, 20.46, 20.39, 18.82, 11.47 (the carbon attached to boron was not observed due to quadrupolar relaxation).

<sup>11</sup>B NMR (128 MHz, CDCl<sub>3</sub>) δ 12.33.

ESI MS calcd for C<sub>32</sub>H<sub>55</sub>BNO<sub>4</sub>Si<sup>+</sup> [M+H]<sup>+</sup> 556.40, found 556.6.

Chiral HPLC CHIRALPAK® AD-H, 1.0% IPA in hexane, 1.5 mL/min, 254 nm: 96% ee

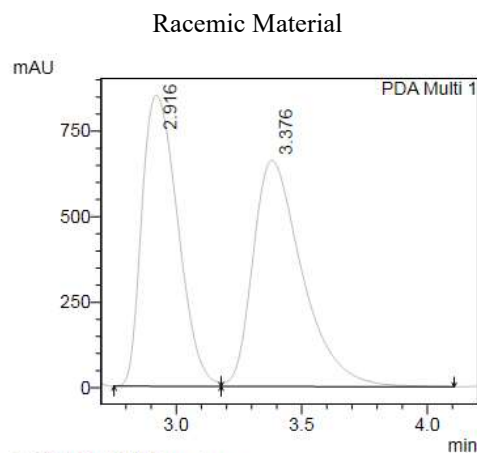

1 PDA Multi 1/254nm 4nm

| PeakTable |           |          |         |
|-----------|-----------|----------|---------|
| Peak#     | Ret. Time | Area     | Area %  |
| 1         | 2.916     | 8466582  | 48.381  |
| 2         | 3.376     | 9033137  | 51.619  |
| Total     |           | 17499719 | 100.000 |

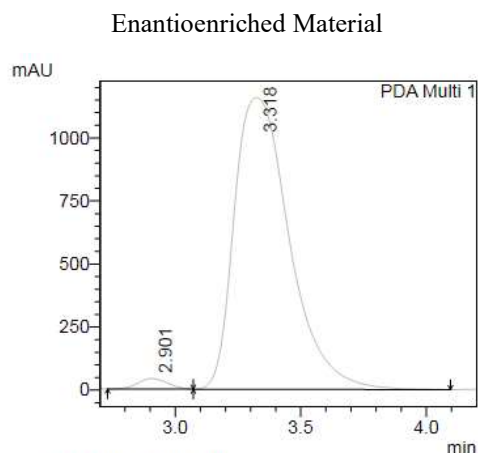

1 PDA Multi 1/254nm 4nm

| PeakTable |           |          |         |
|-----------|-----------|----------|---------|
| Peak#     | Ret. Time | Area     | Area %  |
| 1         | 2.901     | 346965   | 1.924   |
| 2         | 3.318     | 17691094 | 98.076  |
| Total     |           | 18038059 | 100.000 |

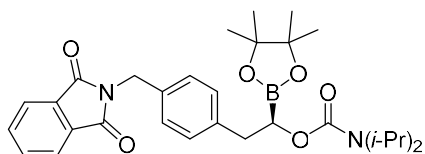

**(R)-2-(4-((1,3-Dioxoisindolin-2-yl)methyl)phenyl)-1-(4,4,5,5-tetramethyl-1,3,2-dioxaborolan-2-yl)ethyl diisopropylcarbamate (4k).**

General procedure E was followed on a 101 mg (0.248 mmol) scale of **3k** with 6 mol% of **L6b** and 5 mol% of the catalyst at 35 °C (the reaction was complete in 18 h). Flash chromatography on silica gel (eluting with hexanes/EtOAc = 60:40) afforded 63 mg (47%) of the product as a beige solid. Absolute stereochemistry was assigned by analogy to **4d**.

<sup>1</sup>H NMR (400 MHz, CDCl<sub>3</sub>) δ 7.87 – 7.78 (m, 2H), 7.72 – 7.65 (m, 2H), 7.37 – 7.30 (m, 2H), 7.23 – 7.16 (m, 2H), 4.81 (s, 2H), 4.03 (dd, *J* = 9.8, 5.2 Hz, 1H), 3.98 (hept, *J* = 6.8 Hz, 1H), 3.73 (hept, *J* = 6.8 Hz, 1H), 2.98 – 2.84 (m, 2H), 1.24 (d, *J* = 6.8 Hz, 3H), 1.23 (d, *J* = 6.8 Hz, 3H), 1.17 (s, 6H), 1.16 (s, 6H), 1.06 (d, *J* = 6.8 Hz, 3H), 1.05 (d, *J* = 6.9 Hz, 3H).

<sup>13</sup>C NMR (101 MHz, CDCl<sub>3</sub>) δ 168.07, 162.64, 140.88, 133.94, 133.81, 132.19, 129.11, 128.44, 123.29, 79.86, 48.25, 46.82, 41.39, 37.46, 25.18, 24.91, 20.43, 20.39, 20.33, 20.27 (the carbon attached to boron was not observed due to quadrupolar relaxation).

<sup>11</sup>B NMR (128 MHz, CDCl<sub>3</sub>) δ 12.43.

ESI MS calcd for C<sub>30</sub>H<sub>40</sub>BN<sub>2</sub>O<sub>6</sub><sup>+</sup> [M+H]<sup>+</sup> 535.30, found 535.4.

Chiral HPLC CHIRALPAK® AD-H, 5.0% IPA in hexane, 1.3 mL/min, 220 nm: 95% ee

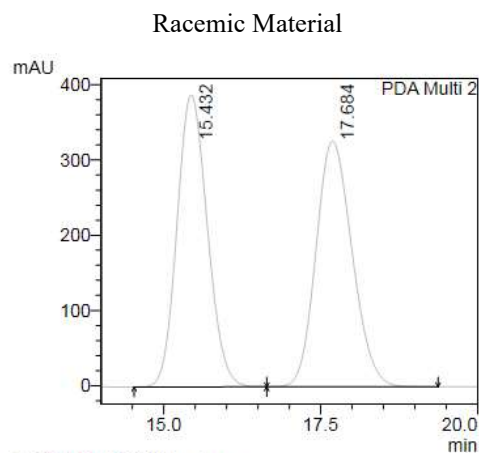

1 PDA Multi 2/220nm 4nm

PeakTable

| Peak# | Ret. Time | Area     | Area %  |
|-------|-----------|----------|---------|
| 1     | 15.432    | 13059810 | 49.917  |
| 2     | 17.684    | 13103116 | 50.083  |
| Total |           | 26162926 | 100.000 |

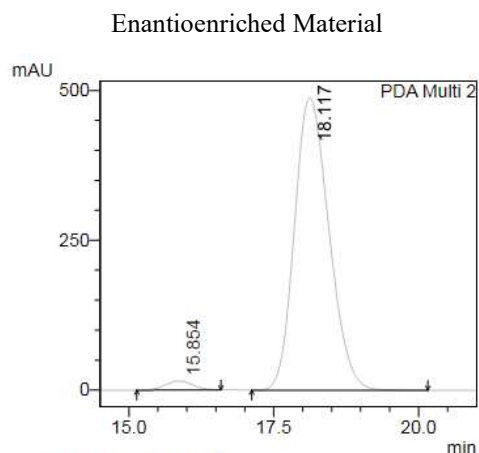

1 PDA Multi 2/220nm 4nm

PeakTable

| Peak# | Ret. Time | Area     | Area %  |
|-------|-----------|----------|---------|
| 1     | 15.854    | 494706   | 2.388   |
| 2     | 18.117    | 20221810 | 97.612  |
| Total |           | 20716517 | 100.000 |

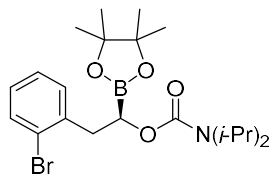

**(R)-2-(2-Bromophenyl)-1-(4,4,5,5-tetramethyl-1,3,2-dioxaborolan-2-yl)ethyl diisopropylcarbamate (4l).**

General procedure E was followed on a 121 mg (0.371 mmol) scale of **31** with 6 mol% of **L6b** and 5 mol% of the catalyst at 35 °C (the reaction was complete in 18 h). Flash chromatography on silica gel (eluting with hexanes/EtOAc = 70:30) afforded 70 mg (42%) of the product as a pale-yellow oil. Absolute stereochemistry was assigned by analogy to **4d**.

<sup>1</sup>H NMR (400 MHz, CDCl<sub>3</sub>) δ 7.54 (dd, *J* = 7.9, 1.3 Hz, 1H), 7.28 (dd, *J* = 6.9, 1.8 Hz, 1H), 7.21 (td, *J* = 7.4, 1.3 Hz, 1H), 7.06 (td, *J* = 7.6, 1.8 Hz, 1H), 4.17 (dd, *J* = 11.4, 3.2 Hz, 1H), 3.98 (hept, *J* = 6.8 Hz, 1H), 3.81 (hept, *J* = 6.8 Hz, 1H), 3.13 (dd, *J* = 15.6, 3.2 Hz, 1H), 3.03 (dd, *J* = 15.5, 11.4 Hz, 1H), 1.28 (d, *J* = 6.8 Hz, 3H), 1.27 (d, *J* = 6.9 Hz, 3H), 1.22 (s, 6H), 1.21 (s, 6H), 1.11 (d, *J* = 6.8 Hz, 6H).

<sup>13</sup>C NMR (151 MHz, CDCl<sub>3</sub>) δ 162.80, 140.57, 132.87, 131.22, 127.69, 127.13, 124.75, 80.03, 48.28, 47.05, 38.39, 25.26, 25.00, 20.59, 20.58, 20.54, 20.41 (the carbon attached to boron was not observed due to quadrupolar relaxation).

<sup>11</sup>B NMR (128 MHz, CDCl<sub>3</sub>) δ 12.59.

ESI MS calcd for C<sub>21</sub>H<sub>34</sub>BBrNO<sub>4</sub><sup>+</sup> [M+H]<sup>+</sup> 454.18, found 454.1.

Chiral HPLC CHIRALCEL® OZ-3, 1.0% IPA in hexane, 1.0 mL/min, 205 nm: 81% ee

Racemic Material

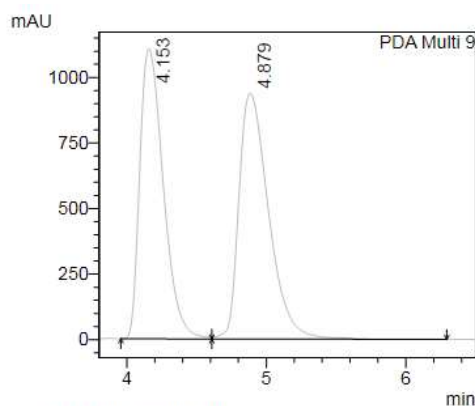

1 PDA Multi 9/205nm 4nm

PeakTable

| Peak# | Ret. Time | Area     | Area %  |
|-------|-----------|----------|---------|
| 1     | 4.153     | 12991543 | 48.366  |
| 2     | 4.879     | 13869533 | 51.634  |
| Total |           | 26861076 | 100.000 |

Enantioenriched Material

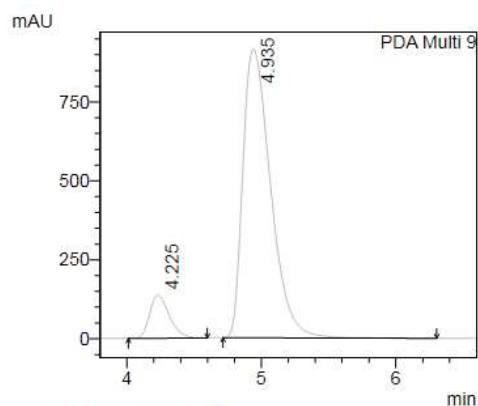

1 PDA Multi 9/205nm 4nm

PeakTable

| Peak# | Ret. Time | Area     | Area %  |
|-------|-----------|----------|---------|
| 1     | 4.225     | 1401215  | 9.633   |
| 2     | 4.935     | 13144283 | 90.367  |
| Total |           | 14545497 | 100.000 |

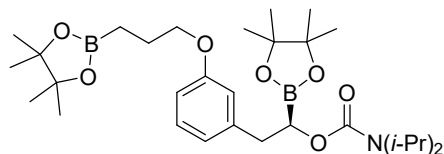

**(R)-1-(4,4,5,5-Tetramethyl-1,3,2-dioxaborolan-2-yl)-2-(3-(3-(4,4,5,5-tetramethyl-1,3,2-dioxaborolan-2-yl)propoxy)phenyl)ethyl diisopropylcarbamate (4m).**

General procedure E was followed on a 106 mg (0.349 mmol) scale of **3m** with 6 mol% of **L6b** and 5 mol% of the catalyst at 35 °C (the reaction was complete in 18 h). Flash chromatography on silica gel (eluting with hexanes/EtOAc = 70:30) afforded 84 mg (43%) of the product as a pale-yellow oil. Absolute stereochemistry was assigned by analogy to **4d**.

<sup>1</sup>H NMR (400 MHz, CDCl<sub>3</sub>) δ 7.16 (t, *J* = 8.1 Hz, 1H), 6.85 – 6.79 (m, 2H), 6.72 (ddd, *J* = 8.2, 2.4, 1.2 Hz, 1H), 4.09 (dd, *J* = 8.3, 6.7 Hz, 1H), 4.02 (hept, *J* = 6.8 Hz, 1H), 3.91 (td, *J* = 6.8, 1.0 Hz, 2H), 3.74 (hept, *J* = 6.8 Hz, 1H), 2.95 – 2.86 (m, 2H), 1.87 (p, *J* = 7.0 Hz, 2H), 1.27 – 1.23 (m, 18H), 1.20 (s, 6H), 1.19 (s, 6H), 1.10 (d, *J* = 6.8 Hz, 6H), 0.90 (t, *J* = 7.9 Hz, 2H).

<sup>13</sup>C NMR (151 MHz, CDCl<sub>3</sub>) δ 162.85, 159.22, 142.87, 129.08, 121.12, 115.03, 112.23, 83.21, 79.97, 69.61, 48.45, 46.87, 38.05, 25.34, 25.04, 24.97, 24.85, 23.96, 20.61, 20.54, 20.46, 20.40 (the carbons attached to borons were not observed due to quadrupolar relaxation).

<sup>11</sup>B NMR (128 MHz, CDCl<sub>3</sub>) δ 33.95, 12.48.

ESI MS calcd for C<sub>30</sub>H<sub>51</sub>B<sub>2</sub>NNaO<sub>7</sub><sup>+</sup> [M+Na]<sup>+</sup> 582.37, found 582.3.

Chiral HPLC CHIRALPAK® AD-H, 0.75% IPA in hexane, 1.2 mL/min, 205 nm: 95% ee

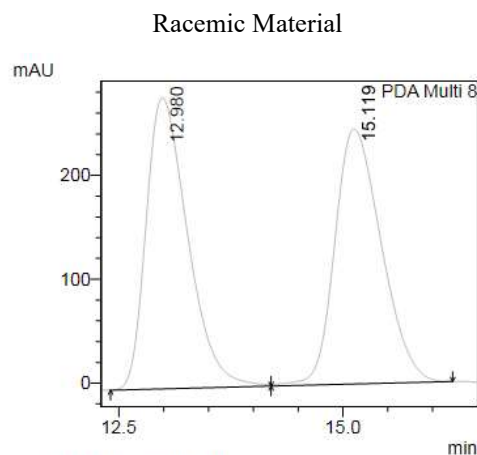

| PeakTable |           |          |         |
|-----------|-----------|----------|---------|
| Peak#     | Ret. Time | Area     | Area %  |
| 1         | 12.980    | 9048966  | 50.523  |
| 2         | 15.119    | 8861663  | 49.477  |
| Total     |           | 17910629 | 100.000 |

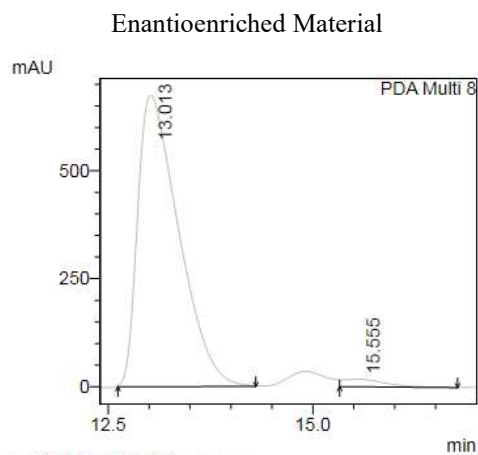

| PeakTable |           |          |         |
|-----------|-----------|----------|---------|
| Peak#     | Ret. Time | Area     | Area %  |
| 1         | 13.013    | 23537598 | 97.332  |
| 2         | 15.555    | 645134   | 2.668   |
| Total     |           | 24182732 | 100.000 |

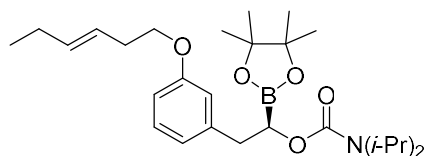

**(*R,E*)-2-(3-(Hex-3-en-1-yloxy)phenyl)-1-(4,4,5,5-tetramethyl-1,3,2-dioxaborolan-2-yl)ethyl diisopropylcarbamate (**4n**).**

General procedure E was followed on a 102 mg (0.295 mmol) scale of **3n** with 6 mol% of **L6b** and 5 mol% of the catalyst at 35 °C (the reaction was complete in 18 h). Flash chromatography on silica gel (eluting with DCM/Et<sub>2</sub>O = 95:5) afforded 42 mg (30%) of the product as a colorless oil. Absolute stereochemistry was assigned by analogy to **4d**.

<sup>1</sup>H NMR (400 MHz, CDCl<sub>3</sub>) δ 7.17 (t, *J* = 8.0 Hz, 1H), 6.86 – 6.80 (m, 2H), 6.73 (dd, *J* = 7.5, 2.5 Hz, 1H), 5.60 (dt, *J* = 15.5, 6.2 Hz, 1H), 5.47 (dt, *J* = 15.3, 6.8 Hz, 1H), 4.09 (dd, *J* = 8.6, 6.5 Hz, 1H), 4.02 (hept, *J* = 6.7 Hz, 1H), 3.94 (td, *J* = 7.0, 1.8 Hz, 2H), 3.75 (hept, *J* = 7.0 Hz, 1H), 2.95 – 2.89 (m, 2H), 2.46 (q, *J* = 6.8 Hz, 2H), 2.03 (p, *J* = 7.4 Hz, 2H), 1.25 (d, *J* = 6.8 Hz, 6H), 1.20 (s, 6H), 1.19 (s, 6H), 1.10 (d, *J* = 6.8 Hz, 6H), 0.98 (t, *J* = 7.4 Hz, 3H).

<sup>13</sup>C NMR (151 MHz, CDCl<sub>3</sub>) δ 162.85, 159.04, 142.92, 134.89, 129.14, 124.62, 121.35, 115.01, 112.29, 79.99, 67.84, 48.47, 46.88, 38.04, 32.68, 25.81, 25.34, 25.04, 20.60, 20.54, 20.46, 20.40, 13.89 (the carbon attached to boron was not observed due to quadrupolar relaxation).

<sup>11</sup>B NMR (128 MHz, CDCl<sub>3</sub>) δ 12.92.

ESI MS calcd for C<sub>27</sub>H<sub>45</sub>BNO<sub>5</sub><sup>+</sup> [M+H]<sup>+</sup> 474.34, found 474.6.

Chiral HPLC CHIRALPAK® AD-H, 1.0% IPA in hexane, 1.3 mL/min, 205 nm: 90% ee

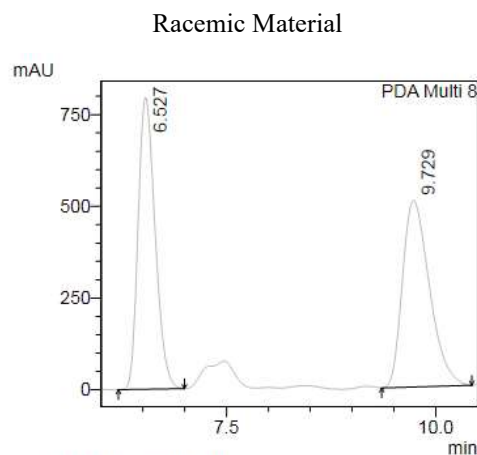

1 PDA Multi 8/205nm 4nm

| PeakTable |           |          |         |
|-----------|-----------|----------|---------|
| Peak#     | Ret. Time | Area     | Area %  |
| 1         | 6.527     | 11217049 | 49.581  |
| 2         | 9.729     | 11406566 | 50.419  |
| Total     |           | 22623615 | 100.000 |

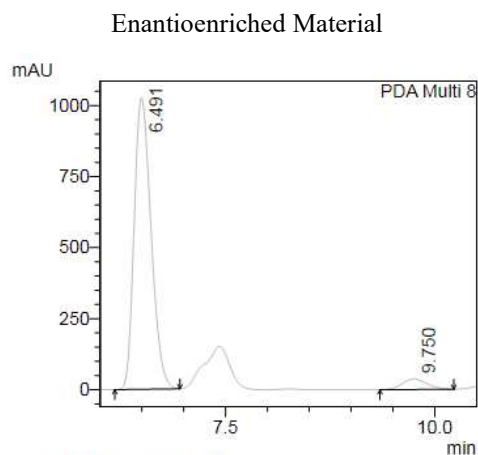

1 PDA Multi 8/205nm 4nm

| PeakTable |           |          |         |
|-----------|-----------|----------|---------|
| Peak#     | Ret. Time | Area     | Area %  |
| 1         | 6.491     | 14396199 | 95.034  |
| 2         | 9.750     | 752281   | 4.966   |
| Total     |           | 15148480 | 100.000 |

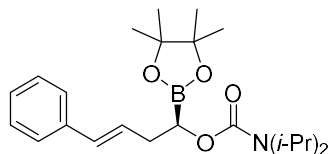

**(*R,E*)-4-Phenyl-1-(4,4,5,5-tetramethyl-1,3,2-dioxaborolan-2-yl)but-3-en-1-yl diisopropylcarbamate (**40**).**

General procedure E was followed on a 100 mg (0.366 mmol) scale of **30** with 6 mol% of **L6b** and 5 mol% of the catalyst at 35 °C (the reaction was complete in 18 h). Flash chromatography on silica gel (eluting with hexanes/EtOAc = 75:25) afforded 90 mg (61%) of the product as a pale-yellow oil. Absolute stereochemistry was assigned by analogy to **4d**.

<sup>1</sup>H NMR (400 MHz, CDCl<sub>3</sub>) δ 7.36 – 7.32 (m, 2H), 7.31 – 7.26 (m, 2H), 7.23 – 7.14 (m, 1H), 6.43 (d, *J* = 16.0 Hz, 1H), 6.34 (dt, *J* = 15.8, 6.5 Hz, 1H), 4.08 (hept, *J* = 6.8 Hz, 1H), 3.92 (dd, *J* = 9.9, 4.7 Hz, 1H), 3.78 (hept, *J* = 6.8 Hz, 1H), 2.64 – 2.47 (m, 2H), 1.24 (d, *J* = 6.8 Hz, 6H), 1.20 (s, 12H), 1.19 (d, *J* = 6.7 Hz, 3H), 1.18 (d, *J* = 6.7 Hz, 3H).

<sup>13</sup>C NMR (151 MHz, CDCl<sub>3</sub>) δ 162.92, 138.08, 131.11, 129.50, 128.56, 126.91, 126.12, 79.97, 48.64, 46.81, 35.58, 25.41, 25.02, 20.71, 20.58, 20.42, 20.34 (the carbon attached to boron was not observed due to quadrupolar relaxation).

<sup>11</sup>B NMR (128 MHz, CDCl<sub>3</sub>) δ 12.98.

ESI MS calcd for C<sub>23</sub>H<sub>37</sub>BNO<sub>4</sub><sup>+</sup> [M+H]<sup>+</sup> 402.28, found 402.2.

Chiral HPLC CHIRALCEL® OD-H, 0.5% IPA in hexane, 1.0 mL/min, 251 nm: 92% ee

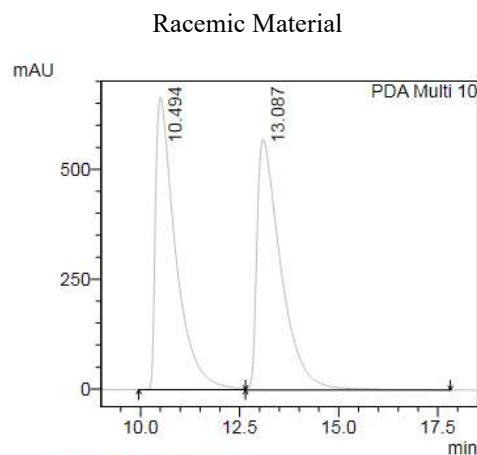

1 PDA Multi 10/251nm 4nm

| PeakTable |           |          |         |
|-----------|-----------|----------|---------|
| Peak#     | Ret. Time | Area     | Area %  |
| 1         | 10.494    | 23372091 | 49.486  |
| 2         | 13.087    | 23857671 | 50.514  |
| Total     |           | 47229762 | 100.000 |

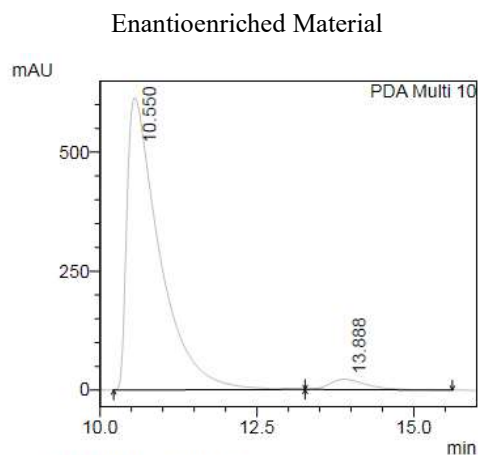

1 PDA Multi 10/251nm 4nm

| PeakTable |           |          |         |
|-----------|-----------|----------|---------|
| Peak#     | Ret. Time | Area     | Area %  |
| 1         | 10.550    | 22129141 | 96.231  |
| 2         | 13.888    | 866640   | 3.769   |
| Total     |           | 22995781 | 100.000 |

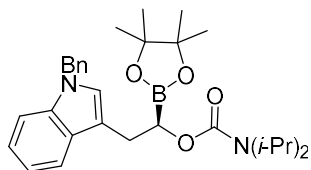

**(R)-2-(1-Benzyl-1H-indol-3-yl)-1-(4,4,5,5-tetramethyl-1,3,2-dioxaborolan-2-yl)ethyl diisopropylcarbamate (4p).**

General procedure E was followed on an 87 mg (0.23 mmol) scale of **3p** with 6 mol% of **L6b** and 5 mol% of the catalyst at 35 °C (the reaction was complete in 18 h). Flash chromatography on silica gel (eluting with hexanes/EtOAc = 70:30) afforded 57 mg (49%) of the product as a dark-orange oil. Absolute stereochemistry was assigned by analogy to **4d**.

<sup>1</sup>H NMR (400 MHz, CDCl<sub>3</sub>) δ 7.64 (d, *J* = 7.9 Hz, 1H), 7.32 – 7.19 (m, 4H), 7.16 (ddd, *J* = 8.2, 7.0, 1.3 Hz, 1H), 7.14 – 7.04 (m, 3H), 6.97 (s, 1H), 5.28 (s, 2H), 4.26 – 4.16 (m, 1H), 4.00 (hept, *J* = 6.8 Hz, 1H), 3.73 (hept, *J* = 6.9 Hz, 1H), 3.17 – 3.04 (m, 2H), 1.31 – 1.16 (m, 18H), 1.06 (d, *J* = 6.8 Hz, 3H), 1.02 (d, *J* = 6.8 Hz, 3H).

<sup>13</sup>C NMR (101 MHz, CDCl<sub>3</sub>) δ 162.78, 137.92, 136.62, 128.65, 128.46, 127.44, 126.86, 125.91, 121.50, 119.43, 118.69, 114.78, 109.38, 79.83, 49.80, 48.17, 46.76, 27.34, 25.23, 24.95, 20.46, 20.38, 20.34, 20.30 (the carbon attached to boron was not observed due to quadrupolar relaxation).

<sup>11</sup>B NMR (128 MHz, CDCl<sub>3</sub>) δ 12.64.

ESI MS calcd for C<sub>30</sub>H<sub>42</sub>BN<sub>2</sub>O<sub>4</sub><sup>+</sup> [M+H]<sup>+</sup> 505.32, found 505.4.

Chiral HPLC CHIRALCEL® OZ-3, 1.0% IPA in hexane, 1.0 mL/min, 220 nm: 93% ee



Racemic Material

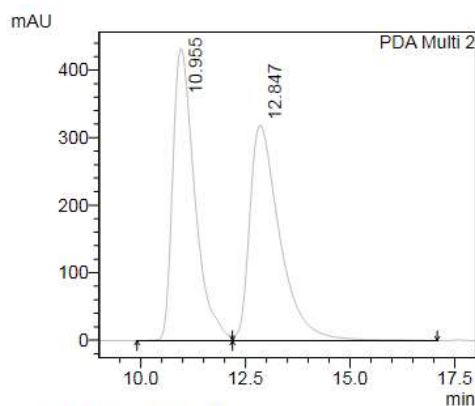

1 PDA Multi 2/220nm 4nm

PeakTable

| Peak# | Ret. Time | Area     | Area %  |
|-------|-----------|----------|---------|
| 1     | 10.955    | 15846827 | 49.807  |
| 2     | 12.847    | 15969389 | 50.193  |
| Total |           | 31816216 | 100.000 |

Enantioenriched Material

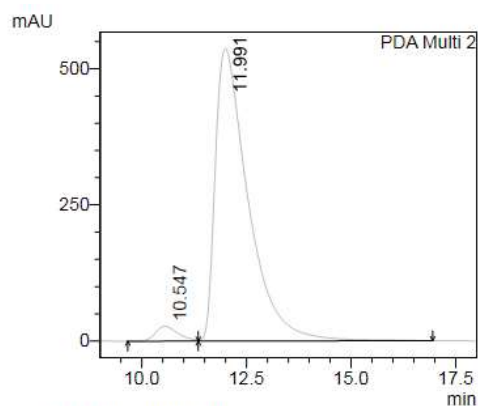

1 PDA Multi 2/220nm 4nm

PeakTable

| Peak# | Ret. Time | Area     | Area %  |
|-------|-----------|----------|---------|
| 1     | 10.547    | 1033922  | 3.394   |
| 2     | 11.991    | 29431593 | 96.606  |
| Total |           | 30465515 | 100.000 |

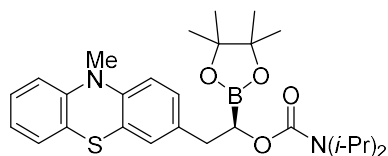

**(R)-2-(10-Methyl-10H-phenothiazin-3-yl)-1-(4,4,5,5-tetramethyl-1,3,2-dioxaborolan-2-yl)ethyl diisopropylcarbamate (4q).**

General procedure E was followed on an 85 mg (0.22 mmol) scale of **3q** with 6 mol% of **L6b** and 5 mol% of the catalyst at 35 °C (the reaction was complete in 18 h). Flash chromatography on silica gel (eluting with hexanes/EtOAc = 60:40) afforded 58 mg (52%) of the product as a brown solid. Absolute stereochemistry was assigned by analogy to **4d**.

<sup>1</sup>H NMR (600 MHz, CD<sub>3</sub>CN) δ 7.20 (ddd, *J* = 8.7, 7.4, 1.5 Hz, 1H), 7.13 (dd, *J* = 7.6, 1.5 Hz, 1H), 7.11 (dd, *J* = 8.1, 2.0 Hz, 1H), 7.08 (d, *J* = 2.0 Hz, 1H), 6.92 (t, *J* = 7.5 Hz, 1H), 6.90 (d, *J* = 8.1 Hz, 1H), 6.83 (d, *J* = 8.3 Hz, 1H), 3.89 (hept, *J* = 6.8 Hz, 1H), 3.86 (hept, *J* = 6.8 Hz, 1H), 3.80 (dd, *J* = 10.1, 4.7 Hz, 1H), 3.32 (s, 3H), 2.84 – 2.67 (m, 2H), 1.23 (d, *J* = 6.8 Hz, 6H), 1.13 – 1.10 (m, 6H), 1.11 (s, 6H), 1.08 (s, 6H).

<sup>13</sup>C NMR (151 MHz, CD<sub>3</sub>CN) δ 162.88, 146.95, 144.72, 136.27, 129.24, 128.60, 128.53, 127.79, 123.75, 123.34, 123.23, 115.23, 115.11, 80.63, 48.37, 37.49, 35.76, 25.60, 25.37, 25.13, 20.55, 20.51, 20.49, 20.42 (the carbon attached to boron was not observed due to quadrupolar relaxation).

<sup>11</sup>B NMR (128 MHz, CDCl<sub>3</sub>) δ 12.53.

ESI MS calcd for C<sub>28</sub>H<sub>40</sub>BN<sub>2</sub>O<sub>4</sub>S<sup>+</sup> [M+H]<sup>+</sup> 511.28, found 511.4.

Chiral HPLC CHIRALPAK® AD-H, 10% IPA in hexane, 1.3 mL/min, 254 nm: 91% ee

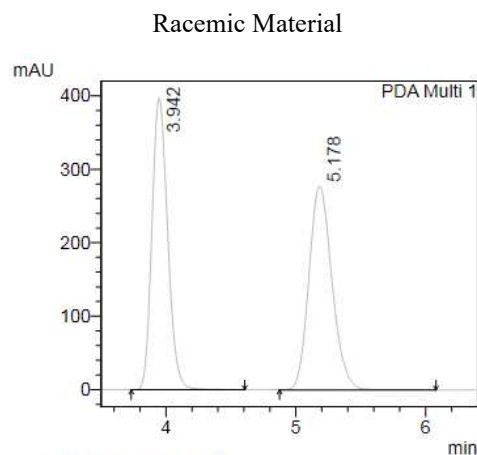

1 PDA Multi 1/254nm 4nm

| PeakTable |           |         |         |
|-----------|-----------|---------|---------|
| Peak#     | Ret. Time | Area    | Area %  |
| 1         | 3.942     | 3351192 | 49.438  |
| 2         | 5.178     | 3427451 | 50.562  |
| Total     |           | 6778642 | 100.000 |

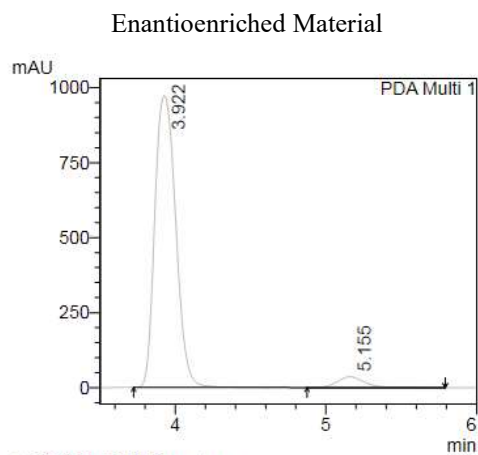

1 PDA Multi 1/254nm 4nm

| PeakTable |           |         |         |
|-----------|-----------|---------|---------|
| Peak#     | Ret. Time | Area    | Area %  |
| 1         | 3.922     | 9416760 | 95.479  |
| 2         | 5.155     | 445897  | 4.521   |
| Total     |           | 9862658 | 100.000 |

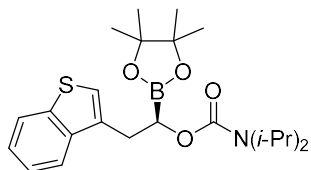

**(R)-2-(Benzo[*b*]thiophen-3-yl)-1-(4,4,5,5-tetramethyl-1,3,2-dioxaborolan-2-yl)ethyl diisopropylcarbamate (**4r**).**

General procedure E was followed on a 113 mg (0.372 mmol) scale of **3r** with 6 mol% of **L6b** and 5 mol% of the catalyst at 35 °C (the reaction was complete in 18 h). Flash chromatography on silica gel (eluting with hexanes/EtOAc = 70:30) afforded 101 mg (63%) of the product as a beige solid. Absolute stereochemistry was assigned by analogy to **4d**.

<sup>1</sup>H NMR (400 MHz, CDCl<sub>3</sub>) δ 7.85 (dd, *J* = 7.2, 1.8 Hz, 1H), 7.79 (dd, *J* = 7.2, 1.7 Hz, 1H), 7.35 (pd, *J* = 7.1, 1.3 Hz, 2H), 7.21 (s, 1H), 4.26 (dd, *J* = 9.6, 5.0 Hz, 1H), 4.02 (hept, *J* = 6.8 Hz, 1H), 3.76 (hept, *J* = 6.9 Hz, 1H), 3.26 – 3.12 (m, 2H), 1.27 (d, *J* = 6.8 Hz, 3H), 1.26 (d, *J* = 6.7 Hz, 3H), 1.22 (s, 6H), 1.22 (s, 6H), 1.11 (d, *J* = 6.8 Hz, 3H), 1.07 (d, *J* = 6.8 Hz, 3H).

<sup>13</sup>C NMR (151 MHz, CDCl<sub>3</sub>) δ 162.82, 140.48, 139.39, 135.64, 124.19, 123.86, 122.88, 122.05, 121.88, 80.11, 48.45, 47.04, 30.77, 25.35, 25.04, 20.63, 20.51, 20.49, 20.41 (the carbon attached to boron was not observed due to quadrupolar relaxation).

<sup>11</sup>B NMR (128 MHz, CDCl<sub>3</sub>) δ 12.68.

ESI MS calcd for C<sub>23</sub>H<sub>35</sub>BNO<sub>4</sub>S<sup>+</sup> [M+H]<sup>+</sup> 432.24, found 432.4.

Chiral HPLC CHIRALCEL® OZ-3, 0.45% IPA in hexane, 1.25 mL/min, 230 nm: 95% ee

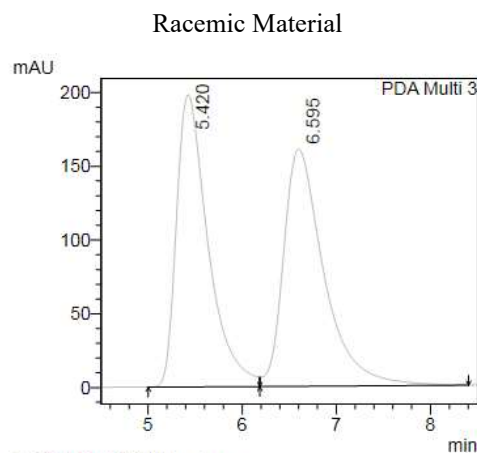

1 PDA Multi 3/230nm 4nm

PeakTable

| Peak# | Ret. Time | Area    | Area %  |
|-------|-----------|---------|---------|
| 1     | 5.420     | 4615334 | 49.049  |
| 2     | 6.595     | 4794362 | 50.951  |
| Total |           | 9409696 | 100.000 |

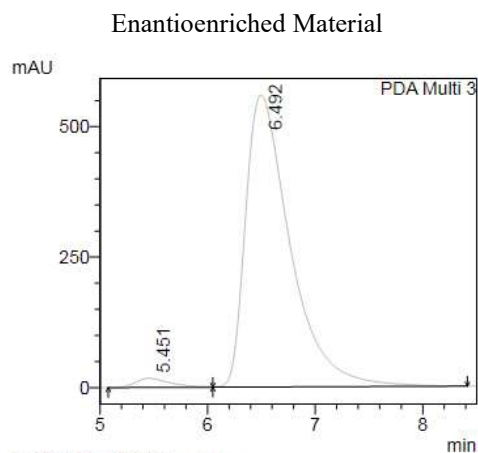

1 PDA Multi 3/230nm 4nm

PeakTable

| Peak# | Ret. Time | Area     | Area %  |
|-------|-----------|----------|---------|
| 1     | 5.451     | 392491   | 2.375   |
| 2     | 6.492     | 16135830 | 97.625  |
| Total |           | 16528320 | 100.000 |

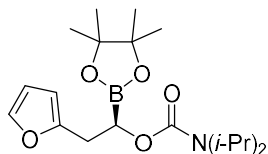

**(R)-2-(Furan-2-yl)-1-(4,4,5,5-tetramethyl-1,3,2-dioxaborolan-2-yl)ethyl diisopropylcarbamate (4s).**

General procedure E was followed on a 94 mg (0.40 mmol) scale of **3s** with 6 mol% of **L6b** and 5 mol% of the catalyst at 35 °C (the reaction was complete in 18 h). Flash chromatography on silica gel (eluting with hexanes/EtOAc = 70:30) afforded 88 mg (61%) of the product as a brown oil. Absolute stereochemistry was assigned by analogy to **4d**.

<sup>1</sup>H NMR (400 MHz, CDCl<sub>3</sub>) δ 7.31 (dd, *J* = 1.9, 0.9 Hz, 1H), 6.28 (dd, *J* = 3.1, 1.9 Hz, 1H), 6.06 (dt, *J* = 3.1, 0.9 Hz, 1H), 4.16 – 4.05 (m, 2H), 3.72 (hept, *J* = 6.9 Hz, 1H), 2.99 (ddd, *J* = 16.7, 11.0, 0.8 Hz, 1H), 2.91 (ddd, *J* = 16.7, 3.9, 1.0 Hz, 1H), 1.24 (d, *J* = 6.8 Hz, 6H), 1.18 (s, 12H), 1.16 (d, *J* = 6.8 Hz, 3H), 1.15 (d, *J* = 6.8 Hz, 3H).

<sup>13</sup>C NMR (151 MHz, CDCl<sub>3</sub>) δ 162.93, 155.39, 140.93, 110.21, 105.53, 80.03, 48.80, 46.79, 30.55, 25.31, 24.96, 20.66, 20.47, 20.39, 20.30 (the carbon attached to boron was not observed due to quadrupolar relaxation).

<sup>11</sup>B NMR (128 MHz, CDCl<sub>3</sub>) δ 12.57.

ESI MS calcd for C<sub>19</sub>H<sub>33</sub>BNO<sub>5</sub><sup>+</sup> [M+H]<sup>+</sup> 366.24, found 366.2.

Chiral HPLC CHIRALCEL® OD-H, 0.8% IPA in hexane, 1.0 mL/min, 210 nm: 92% ee

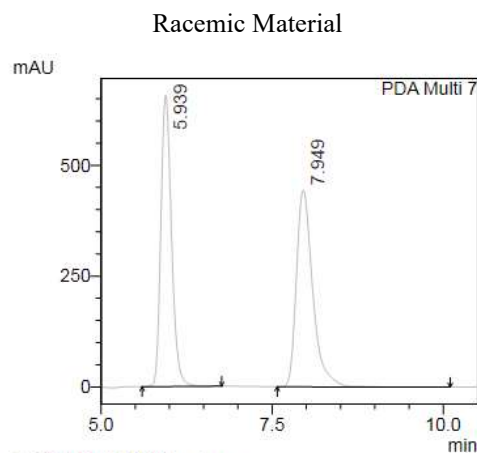

1 PDA Multi 7/210nm 4nm

PeakTable

| Peak# | Ret. Time | Area     | Area %  |
|-------|-----------|----------|---------|
| 1     | 5.939     | 7095025  | 49.088  |
| 2     | 7.949     | 7358710  | 50.912  |
| Total |           | 14453735 | 100.000 |

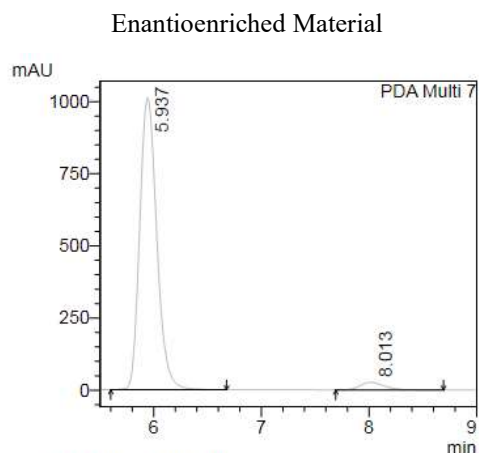

1 PDA Multi 7/210nm 4nm

PeakTable

| Peak# | Ret. Time | Area     | Area %  |
|-------|-----------|----------|---------|
| 1     | 5.937     | 11158054 | 96.240  |
| 2     | 8.013     | 435885   | 3.760   |
| Total |           | 11593939 | 100.000 |

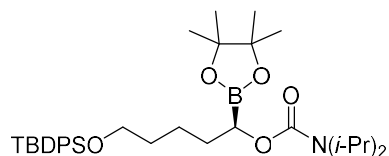

**(R)-5-((tert-Butyldiphenylsilyloxy)-1-(4,4,5,5-tetramethyl-1,3,2-dioxaborolan-2-yl)pentyl diisopropylcarbamate (4t).**

General procedure E was followed on a 100 mg (0.214 mmol) scale of **3t** with 11 mol% of **L6b** and 10 mol% of the catalyst at room temperature (the reaction was complete in 48 h). Flash chromatography on silica gel (eluting with hexanes/EtOAc = 70:30) afforded 71 mg (56%) of the product as a colorless oil. Absolute stereochemistry was assigned by analogy to **4d**.

<sup>1</sup>H NMR (400 MHz, CDCl<sub>3</sub>) δ 7.70 – 7.62 (m, 4H), 7.45 – 7.32 (m, 6H), 4.07 (hept, *J* = 6.8 Hz, 1H), 3.83 – 3.72 (m, 2H), 3.67 (t, *J* = 5.9 Hz, 2H), 1.75 – 1.52 (m, 6H), 1.24 (d, *J* = 6.8 Hz, 6H), 1.19 (d, *J* = 6.9 Hz, 6H), 1.18 (s, 6H), 1.17 (s, 6H), 1.03 (s, 9H).

<sup>13</sup>C NMR (151 MHz, CDCl<sub>3</sub>) δ 162.94, 135.70, 134.28, 129.60, 127.70, 79.82, 64.14, 48.52, 46.68, 32.76, 31.47, 29.85, 26.99, 25.38, 25.07, 24.46, 20.74, 20.45, 20.39, 19.35 (the carbon attached to boron was not observed due to quadrupolar relaxation).

<sup>11</sup>B NMR (128 MHz, CDCl<sub>3</sub>) δ 13.00.

ESI MS calcd for C<sub>34</sub>H<sub>55</sub>BNO<sub>5</sub>Si<sup>+</sup> [M+H]<sup>+</sup> 596.39, found 596.6.

Chiral HPLC CHIRALCEL® OZ-3, 0.4% IPA in hexane, 1.0 mL/min, 205 nm: 97% ee

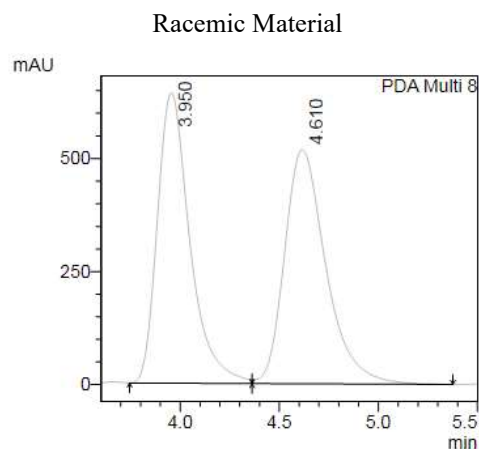

1 PDA Multi 8/205nm 4nm

| PeakTable |           |          |         |
|-----------|-----------|----------|---------|
| Peak#     | Ret. Time | Area     | Area %  |
| 1         | 3.950     | 7323070  | 49.373  |
| 2         | 4.610     | 7508984  | 50.627  |
| Total     |           | 14832054 | 100.000 |

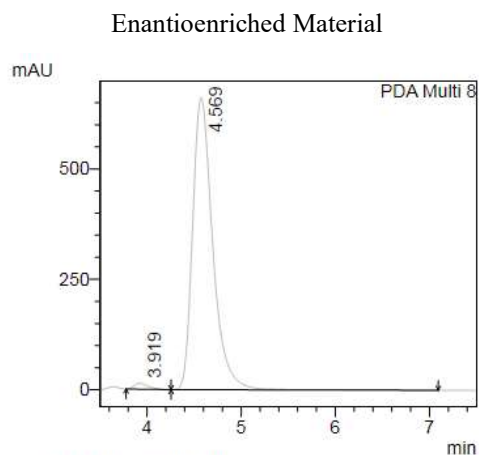

1 PDA Multi 8/205nm 4nm

| PeakTable |           |         |         |
|-----------|-----------|---------|---------|
| Peak#     | Ret. Time | Area    | Area %  |
| 1         | 3.919     | 138900  | 1.395   |
| 2         | 4.569     | 9815249 | 98.605  |
| Total     |           | 9954149 | 100.000 |

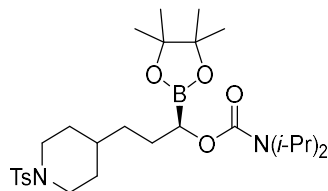

**(R)-1-(4,4,5,5-Tetramethyl-1,3,2-dioxaborolan-2-yl)-3-(1-tosylpiperidin-4-yl)propyl diisopropylcarbamate (4u).**

General procedure E was followed on a 151 mg (0.357 mmol) scale of **3u** with 12 mol% of **L6b** and 10 mol% of the catalyst at room temperature (the reaction was complete in 48 h). Flash chromatography on silica gel (eluting with hexanes/EtOAc = 60:40) afforded 59 mg (30%) of the product as a white solid. Absolute stereochemistry was assigned by analogy to **4d**.

<sup>1</sup>H NMR (400 MHz, CDCl<sub>3</sub>) δ 7.66 – 7.60 (m, 2H), 7.34 – 7.28 (m, 2H), 4.05 (hept, *J* = 6.7 Hz, 1H), 3.78 (hept, *J* = 6.8 Hz, 1H), 3.78 – 3.70 (m, 2H), 3.69 (dd, *J* = 10.1, 4.3 Hz, 1H), 2.43 (s, 3H), 2.20 (t, *J* = 11.6 Hz, 2H), 1.74 (t, *J* = 13.7 Hz, 2H), 1.46 – 1.25 (m, 3H), 1.23 (d, *J* = 7.0 Hz, 6H), 1.19 (d, *J* = 6.9 Hz, 6H), 1.16 (s, 6H), 1.15 (s, 6H).

<sup>13</sup>C NMR (151 MHz, CDCl<sub>3</sub>) δ 162.84, 143.44, 133.20, 129.67, 127.87, 79.87, 48.60, 46.74, 46.66, 46.63, 35.27, 34.42, 31.88, 31.50, 28.82, 25.40, 25.02, 21.67, 20.73, 20.69, 20.43, 20.36 (the carbon attached to boron was not observed due to quadrupolar relaxation).

<sup>11</sup>B NMR (128 MHz, CDCl<sub>3</sub>) δ 12.98.

ESI MS calcd for C<sub>28</sub>H<sub>48</sub>BN<sub>2</sub>O<sub>6</sub>S<sup>+</sup> [M+H]<sup>+</sup> 551.33, found 551.4.

Chiral HPLC CHIRALPAK® AD-H, 7.0% IPA in hexane, 1.3 mL/min, 220 nm: 96% ee

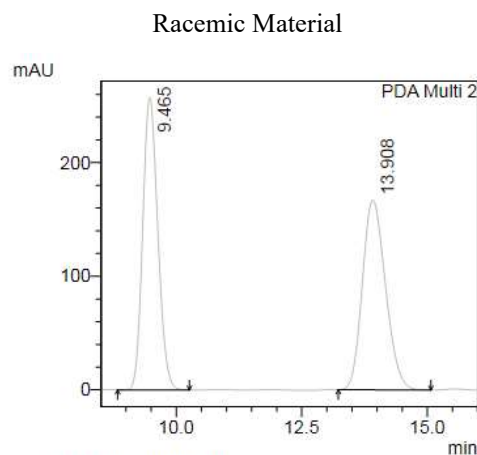

1 PDA Multi 2/220nm 4nm

| PeakTable |           |          |         |
|-----------|-----------|----------|---------|
| Peak#     | Ret. Time | Area     | Area %  |
| 1         | 9.465     | 5382801  | 50.121  |
| 2         | 13.908    | 5356848  | 49.879  |
| Total     |           | 10739650 | 100.000 |

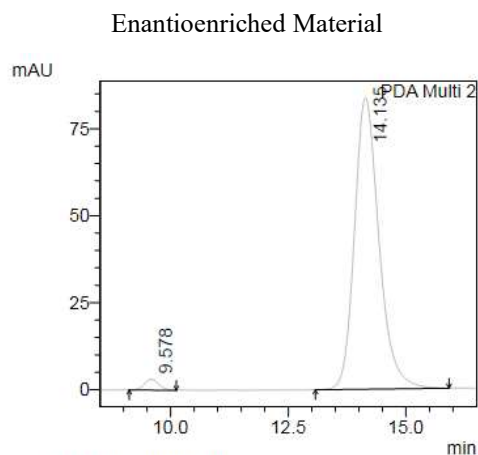

1 PDA Multi 2/220nm 4nm

| PeakTable |           |         |         |
|-----------|-----------|---------|---------|
| Peak#     | Ret. Time | Area    | Area %  |
| 1         | 9.578     | 65829   | 2.122   |
| 2         | 14.135    | 3036542 | 97.878  |
| Total     |           | 3102371 | 100.000 |

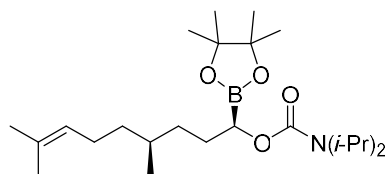

**(1R,4S)-4,8-Dimethyl-1-(4,4,5,5-tetramethyl-1,3,2-dioxaborolan-2-yl)non-7-en-1-yl diisopropylcarbamate (4v).**

General procedure E was followed on an 89 mg (0.30 mmol) scale of **3v** with 12 mol% of **L6b** and 10 mol% of the catalyst at room temperature (the reaction was complete in 48 h). Flash chromatography on silica gel (eluting with hexanes/EtOAc = 80:20) afforded 81 mg (63%) of the product as a colorless oil. Absolute stereochemistry was assigned by analogy to **4d**.

<sup>1</sup>H NMR (400 MHz, CDCl<sub>3</sub>) δ 5.09 (ddq, *J* = 8.5, 5.6, 1.3 Hz, 1H), 4.07 (hept, *J* = 6.8 Hz, 1H), 3.80 (hept, *J* = 6.8 Hz, 1H), 3.74 (dd, *J* = 9.3, 5.1 Hz, 1H), 1.95 (dh, *J* = 14.1, 7.4 Hz, 2H), 1.67 (d, *J* = 1.3 Hz, 3H), 1.67 – 1.08 (m, 7H), 1.59 (s, 3H), 1.24 (d, *J* = 7.2 Hz, 6H), 1.21 (d, *J* = 6.8 Hz, 6H), 1.18 (s, 12H), 0.89 (d, *J* = 6.5 Hz, 3H).

<sup>13</sup>C NMR (151 MHz, CDCl<sub>3</sub>) δ 162.94, 131.07, 125.21, 79.84, 48.52, 46.67, 37.00, 35.30, 32.62, 29.09, 25.87, 25.68, 25.40, 25.07, 20.75, 20.70, 20.45, 20.39, 19.87, 17.77 (the carbon attached to boron was not observed due to quadrupolar relaxation).

<sup>11</sup>B NMR (128 MHz, CDCl<sub>3</sub>) δ 12.59.

ESI MS calcd for C<sub>24</sub>H<sub>47</sub>BNO<sub>4</sub><sup>+</sup> [M+H]<sup>+</sup> 424.36, found 424.3.

Chiral HPLC was not performed due to lack of suitable chromophores; enantiopurity was determined by <sup>13</sup>C NMR (see page S194).

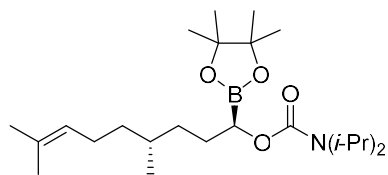

**(1R,4R)-4,8-Dimethyl-1-(4,4,5,5-tetramethyl-1,3,2-dioxaborolan-2-yl)non-7-en-1-yl diisopropylcarbamate (4v').**

General procedure E was followed on a 100 mg (0.338 mmol) scale of **3v'** with 12 mol% of **L6b** and 10 mol% of the catalyst at room temperature (the reaction was complete in 48 h). Flash chromatography on silica gel (eluting with hexanes/EtOAc = 80:20) afforded 54 mg (38%) of the product as a pale-yellow oil. Absolute stereochemistry was assigned by analogy to **4d**.

<sup>1</sup>H NMR (400 MHz, CDCl<sub>3</sub>) δ 5.09 (ddq, *J* = 8.5, 5.6, 1.5 Hz, 1H), 4.08 (hept, *J* = 6.3 Hz, 1H), 3.80 (hept, *J* = 6.9 Hz, 1H), 3.76 (dd, *J* = 10.7, 4.0 Hz, 1H), 2.07 – 1.89 (m, 2H), 1.73 – 1.12 (m, 7H), 1.67 (d, *J* = 1.4 Hz, 3H), 1.59 (d, *J* = 1.4 Hz, 3H), 1.24 (d, *J* = 6.8 Hz, 6H), 1.21 (d, *J* = 6.8 Hz, 6H), 1.18 (s, 12H), 0.87 (d, *J* = 6.5 Hz, 3H).

<sup>13</sup>C NMR (151 MHz, CDCl<sub>3</sub>) δ 162.89, 131.00, 125.11, 79.72, 48.46, 46.59, 37.39, 35.06, 32.34, 28.99, 25.79, 25.69, 25.32, 24.99, 20.68, 20.63, 20.38, 20.31, 19.60, 17.70 (the carbon attached to boron was not observed due to quadrupolar relaxation).

<sup>11</sup>B NMR (128 MHz, CDCl<sub>3</sub>) δ 12.59.

ESI MS calcd for C<sub>24</sub>H<sub>47</sub>BNO<sub>4</sub><sup>+</sup> [M+H]<sup>+</sup> 424.36, found 424.3.

Chiral HPLC was not performed due to lack of suitable chromophores; enantiopurity was determined by <sup>13</sup>C NMR (see page S198).

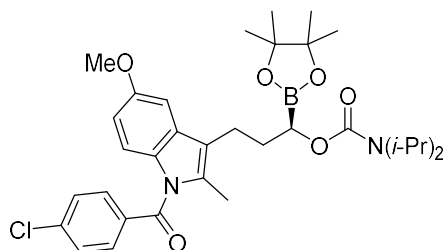

**(R)-3-(1-(4-Chlorobenzoyl)-5-methoxy-2-methyl-1H-indol-3-yl)-1-(4,4,5,5-tetramethyl-1,3,2-dioxaborolan-2-yl)propyl diisopropylcarbamate (4w).**

General procedure E was followed on a 67 mg (0.14 mmol) scale of **3w** with 11 mol% of **L6b** and 10 mol% of the catalyst at room temperature (the reaction was complete in 14 h). Flash chromatography on silica gel (eluting with hexanes/EtOAc = 60:40) afforded 35 mg (41%) of the product as a yellow solid. Absolute stereochemistry was assigned by analogy to **4d**.

<sup>1</sup>H NMR (600 MHz, CDCl<sub>3</sub>) δ 7.69 – 7.64 (m, 2H), 7.52 – 7.46 (m, 2H), 6.99 – 6.95 (m, 2H), 6.67 (dd, *J* = 8.9, 2.6 Hz, 1H), 4.10 (hept, *J* = 6.8 Hz, 1H), 3.91 (dd, *J* = 9.6, 4.2 Hz, 1H), 3.85 (s, 3H), 3.76 (hept, *J* = 6.9 Hz, 1H), 2.88 (ddd, *J* = 14.6, 9.0, 5.9 Hz, 1H), 2.79 (dt, *J* = 14.5, 7.8 Hz, 1H), 2.32 (s, 3H), 2.04 – 1.94 (m, 2H), 1.28 (d, *J* = 6.8 Hz, 6H), 1.25 (d, *J* = 6.8 Hz, 3H), 1.22 (d, *J* = 7.1 Hz, 3H), 1.20 (s, 6H), 1.20 (s, 6H).

<sup>13</sup>C NMR (101 MHz, CDCl<sub>3</sub>) δ 168.39, 162.86, 156.06, 138.96, 134.54, 133.96, 131.48, 131.20, 131.15, 129.15,

120.08, 115.09, 111.25, 101.62, 79.92, 55.86, 48.58, 46.79, 31.71, 25.47, 25.03, 22.47, 20.67, 20.67, 20.47, 20.38, 13.49 (the carbon attached to boron was not observed due to quadrupolar relaxation).

$^{11}\text{B}$  NMR (128 MHz,  $\text{CDCl}_3$ ) 12.78.

ESI MS calcd for  $\text{C}_{33}\text{H}_{45}\text{BClN}_2\text{O}_6^+$   $[\text{M}+\text{H}]^+$  611.31, found 611.5.

Chiral HPLC CHIRALCEL® OZ-3, 3.0% IPA in hexane, 1.0 mL/min, 320 nm: 94% ee

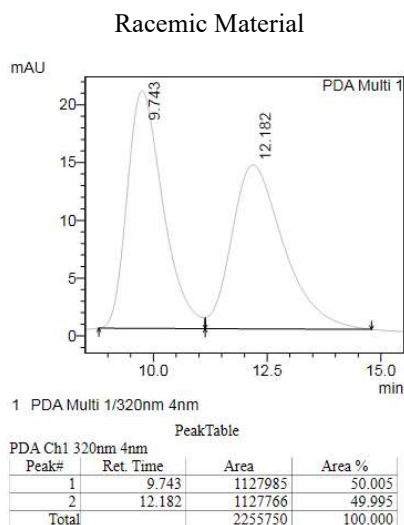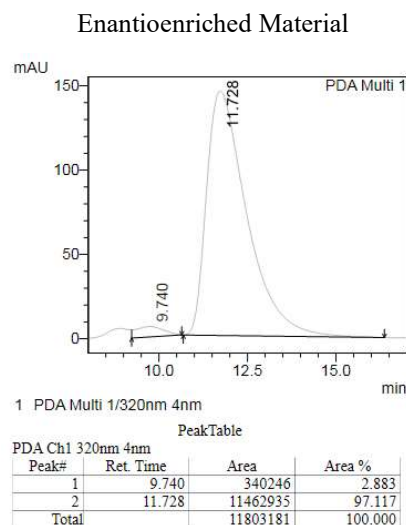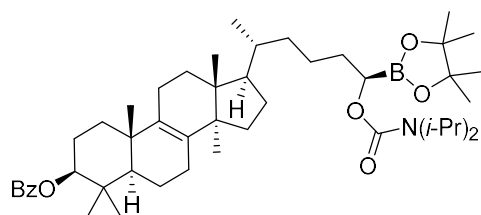

**(3*S*,5*R*,10*S*,13*R*,14*R*,17*R*)-17-((2*R*,6*R*)-6-((Diisopropylcarbamoyloxy)-6-(4,4,5,5-tetramethyl-1,3,2-dioxaborolan-2-yl)hexan-2-yl)-4,4,10,13,14-pentamethyl-2,3,4,5,6,7,10,11,12,13,14,15,16,17-tetradecahydro-1*H*-cyclopenta[*a*]phenanthren-3-yl benzoate (4x).**

General procedure E was followed on a 109 mg (0.169 mmol) scale of **3x** with 12 mol% of **L6b** and 10 mol% of the catalyst at room temperature (the reaction was complete in 48 h). Flash chromatography on silica gel (eluting with hexanes/EtOAc = 80:20) afforded 60 mg (46%) of the product as a white solid. Absolute stereochemistry was assigned by analogy to **4d**.

$^1\text{H}$  NMR (400 MHz,  $\text{CDCl}_3$ )  $\delta$  7.98 (d,  $J = 7.3$  Hz, 2H), 7.48 (t,  $J = 7.4$  Hz, 1H), 7.37 (t,  $J = 7.6$  Hz, 2H), 4.68 (dd,  $J = 11.6, 4.4$  Hz, 1H), 4.02 (hept,  $J = 6.8$  Hz, 1H), 3.78 – 3.65 (m, 2H), 2.06 – 1.91 (m, 3H), 1.89 – 1.03 (m, 22H), 1.20 – 1.13 (m, 12H), 1.11 (s, 12H), 0.98 (s, 3H), 0.98 (s, 3H), 0.89 (s, 3H), 0.84 (d,  $J = 6.4$  Hz, 3H), 0.82 (s, 3H), 0.63 (s, 3H).

$^{13}\text{C}$  NMR (151 MHz,  $\text{CDCl}_3$ )  $\delta$  166.47, 162.96, 134.69, 134.35, 132.86, 131.14, 129.67, 128.46, 81.73, 79.81, 50.71, 50.38, 49.95, 48.57, 46.64, 44.57, 43.17, 38.36, 37.08, 36.42, 36.26, 35.41, 32.17, 31.09, 30.98, 28.27, 28.23, 26.52, 25.42, 25.09, 24.48, 24.39, 21.18, 20.78, 20.71, 20.46, 20.39, 19.36, 18.94, 18.29, 16.97, 15.91 (the carbon attached



to boron was not observed due to quadrupolar relaxation).

$^{11}\text{B}$  NMR (128 MHz,  $\text{CDCl}_3$ )  $\delta$  13.25.

ESI MS calcd for  $\text{C}_{48}\text{H}_{77}\text{BNO}_6^+$   $[\text{M}+\text{H}]^+$  774.58, found 774.4.

Chiral HPLC CHIRALCEL® OZ-3, 0.35% IPA in hexane, 1.2 mL/min, 225 nm: 97:3 dr

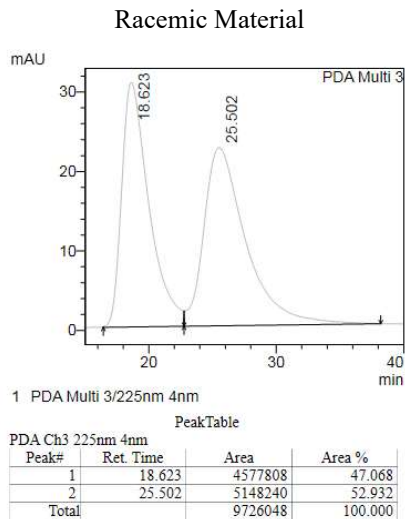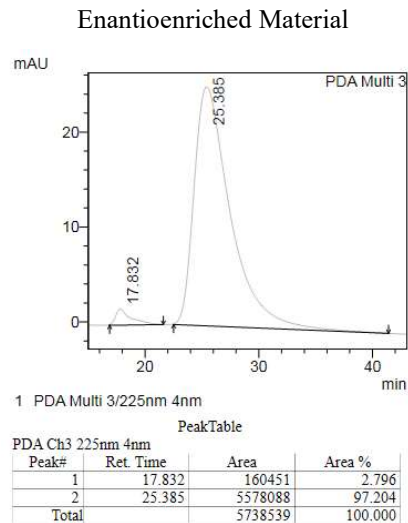

## Limitations of Asymmetric Hydroboration

Figure S3. Substrates that failed to yield the desired hydroboration products

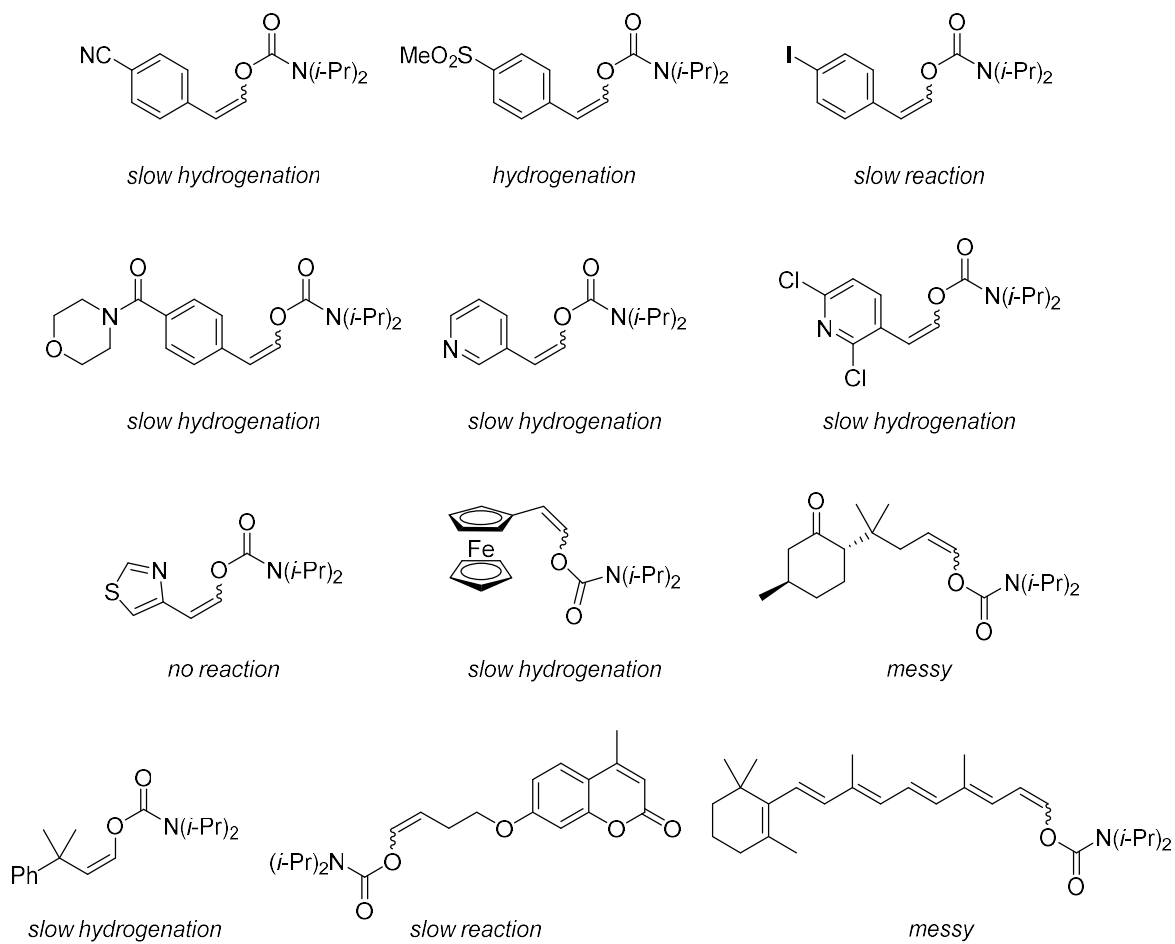

# Reactions of Hydroboration Products with Grignard Reagents

Table S10. Optimization of enantioselectivity of 1,2-metalate rearrangement

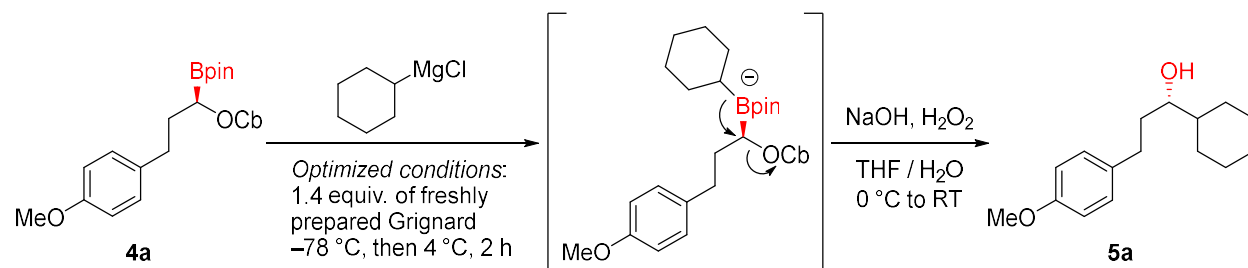

| Entry | Deviation from optimized conditions                      | es (%) <sup>a</sup> | Yield (%) |
|-------|----------------------------------------------------------|---------------------|-----------|
| 1     | None                                                     | 97                  | 71        |
| 2     | Commercial Grignard instead of freshly prepared Grignard | 89–96               | 57–73     |
| 3     | THF instead of Et <sub>2</sub> O                         | –                   | (messy)   |
| 4     | RT instead of [–78 °C, then 4 °C]                        | 85                  | 75        |
| 5     | 4.8 equiv of Grignard instead of 1.4 equiv               | 94                  | 67        |

<sup>a</sup>Enantioselectivity (es) is defined as ee of the product divided by ee of the starting material.

## General Procedure F for the preparation of Grignard reagents

All manipulations were carried out under argon. Halide (10.0 mmol, 1.00 equiv) was dissolved in anhydrous Et<sub>2</sub>O (5.0 mL), and a 0.5-mL portion of the resulting solution was added to dried Mg turnings (0.360 g, 15.0 mmol, 1.50 equiv). Iodine (cat.) was added, and the mixture was heated at 35 °C until discoloration. The remaining portion of the halide solution in Et<sub>2</sub>O was added, and the mixture was stirred at reflux for 1 h. The concentration of the resulting Grignard reagent was determined by iodometric titration.<sup>31</sup>

## General Procedure G for Table S10 (entry 1)

At –78 °C and under argon, freshly prepared Grignard (according to General Procedure F; 0.14 mmol, 1.4 equiv) was added dropwise (over 2 min) to a solution of hydroboration product (0.10 mmol, 1.0 equiv) in anhydrous Et<sub>2</sub>O (1.0 mL). The mixture was stirred under argon in a cold room (4 °C) for 2 h. After that, insoluble solids were removed by filtration through a Pasteur pipette with a silica gel plug (ca. 1 mL of silica gel was used; additional 2-mL portion of Et<sub>2</sub>O was used for washing), and the filtrate was concentrated under vacuum.

The crude secondary boronate was then redissolved in THF (1.0 mL), and the solution was cooled to 0 °C and treated with 3M NaOH (0.17 mL) and 30% aq. H<sub>2</sub>O<sub>2</sub> (0.17 mL). The mixture was stirred at ambient temperature for 2 h. At 0 °C, sat. aq. Na<sub>2</sub>S<sub>2</sub>O<sub>3</sub> (1 mL) was carefully added to quench the reaction, and the product was extracted with EtOAc (3 × 2 mL). Combined organic layers were dried over Na<sub>2</sub>SO<sub>4</sub>, filtered and concentrated. Subsequent flash chromatography afforded the desired secondary alcohol.

Racemic product samples were obtained by following the same procedure using racemic boronates as starting materials.

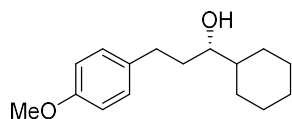

**(S)-1-Cyclohexyl-3-(4-methoxyphenyl)propan-1-ol (5a).**

General procedure G was followed on a 35 mg (0.083 mmol) scale of **4a** (98% ee) with cyclohexylMgCl, which after flash chromatography on silica gel (eluting with hexanes/EtOAc = 85:15) afforded 15 mg (71%) of the product as a white solid. Absolute stereochemistry was assigned by analogy to **5d**.

<sup>1</sup>H NMR (400 MHz, CDCl<sub>3</sub>) δ 7.18 – 7.08 (m, 2H), 6.88 – 6.79 (m, 2H), 3.79 (s, 3H), 3.38 (ddd, *J* = 8.9, 5.4, 3.2 Hz, 1H), 2.77 (ddd, *J* = 13.8, 9.9, 5.4 Hz, 1H), 2.59 (ddd, *J* = 13.8, 9.7, 6.7 Hz, 1H), 1.88 – 1.58 (m, 6H), 1.42 – 0.91 (m, 7H).

<sup>13</sup>C NMR (151 MHz, CDCl<sub>3</sub>) δ 157.83, 134.53, 129.43, 113.92, 75.72, 55.39, 43.90, 36.26, 31.56, 29.30, 27.91, 26.65, 26.46, 26.32.

ESI MS calcd for C<sub>16</sub>H<sub>23</sub>O<sup>+</sup> [M–OH]<sup>+</sup> 231.17, found 231.2.

Chiral HPLC CHIRALCEL® OD-H, 3.5% IPA in hexane, 1.5 mL/min, 220 nm: 95% ee, 97% es

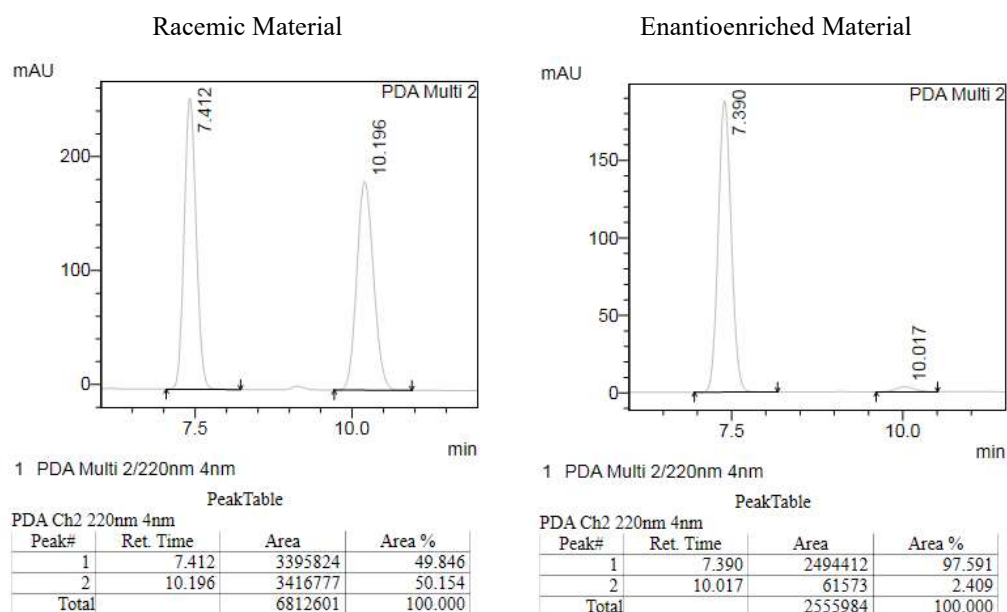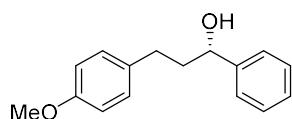

**(S)-3-(4-Methoxyphenyl)-1-phenylpropan-1-ol (5b).**

General procedure G was followed on a 43 mg (0.10 mmol) scale of **4a** (98% ee) with PhMgBr, which after flash chromatography on silica gel (eluting with hexanes/EtOAc = 85:15) afforded 12 mg (50%) of the product as a colorless oil. Absolute stereochemistry was assigned by analogy to **5d**.

<sup>1</sup>H NMR (400 MHz, CDCl<sub>3</sub>) δ 7.27 (d, *J* = 4.1 Hz, 4H), 7.24 – 7.15 (m, 1H), 7.07 – 6.98 (m, 2H), 6.80 – 6.70 (m,

2H), 4.59 (dd,  $J = 7.9, 5.3$  Hz, 1H), 3.70 (s, 3H), 2.61 (ddd,  $J = 13.7, 9.5, 5.8$  Hz, 1H), 2.53 (ddd,  $J = 14.0, 9.7, 7.1$  Hz, 1H), 2.02 (dddd,  $J = 13.8, 9.3, 7.8, 5.9$  Hz, 1H), 1.91 (dddd,  $J = 13.7, 9.5, 6.7, 5.3$  Hz, 1H), 1.79 (s, 1H).

$^{13}\text{C}$  NMR (151 MHz,  $\text{CDCl}_3$ )  $\delta$  157.90, 144.74, 133.91, 129.45, 128.64, 127.76, 126.06, 113.93, 73.99, 55.39, 40.82, 31.26.

ESI MS calcd for  $\text{C}_{16}\text{H}_{17}\text{O}^+$   $[\text{M}-\text{OH}]^+$  225.13, found 225.4.

Chiral HPLC CHIRALCEL® OD-H, 5.0% IPA in hexane, 1.25 mL/min, 210 nm: 94% ee, 96% es

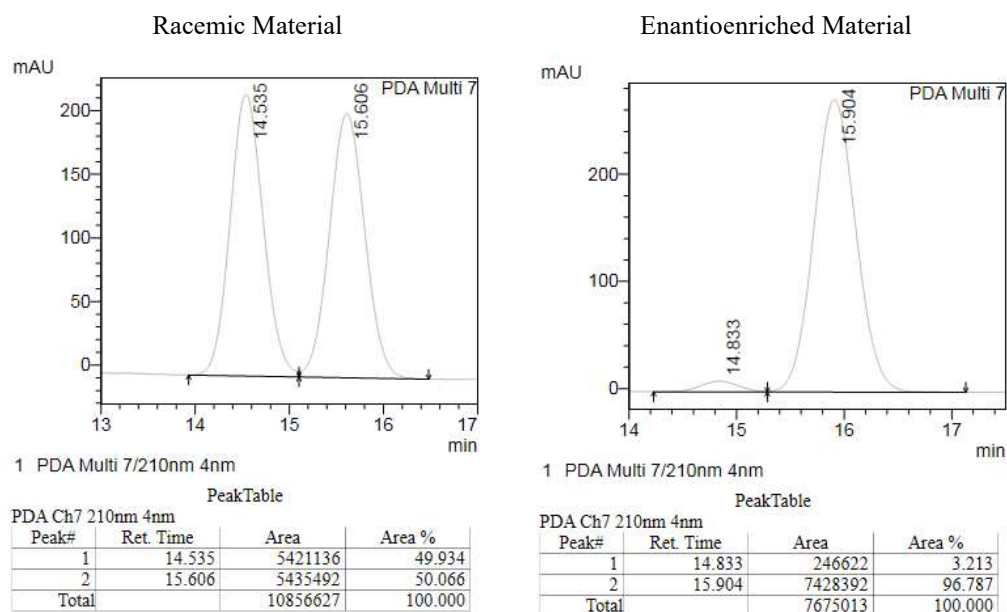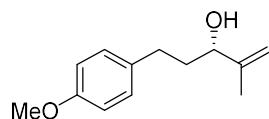

**(S)-5-(4-Methoxyphenyl)-2-methylpent-1-en-3-ol (5c).**

General procedure G was followed on a 34 mg (0.081 mmol) scale of **4a** (92% ee) with isopropenylMgBr, which after flash chromatography on silica gel (eluting with hexanes/EtOAc = 85:15) afforded 11 mg (65%) of the product as a colorless oil. Absolute stereochemistry was assigned by analogy to **5d**.

$^1\text{H}$  NMR (400 MHz,  $\text{CDCl}_3$ )  $\delta$  7.16 – 7.05 (m, 2H), 6.89 – 6.79 (m, 2H), 4.96 (dp,  $J = 1.9, 0.9$  Hz, 1H), 4.86 (p,  $J = 1.6$  Hz, 1H), 4.08 (q,  $J = 7.1, 3.9$  Hz, 1H), 3.79 (s, 3H), 2.67 (ddd,  $J = 15.6, 8.9, 6.9$  Hz, 1H), 2.58 (ddd,  $J = 13.9, 9.0, 7.1$  Hz, 1H), 1.92 – 1.75 (m, 2H), 1.74 (s, 3H), 1.47 (d,  $J = 3.8$  Hz, 1H).

$^{13}\text{C}$  NMR (151 MHz,  $\text{CDCl}_3$ )  $\delta$  157.90, 147.58, 134.13, 129.47, 113.93, 111.35, 75.39, 55.41, 36.93, 31.10, 17.77.

ESI MS calcd for  $\text{C}_{13}\text{H}_{17}\text{O}^+$   $[\text{M}-\text{OH}]^+$  189.13, found 189.2.

Chiral HPLC CHIRALCEL® OD-H, 1.5% IPA in hexane, 1.5 mL/min, 220 nm: 88% ee, 96% es

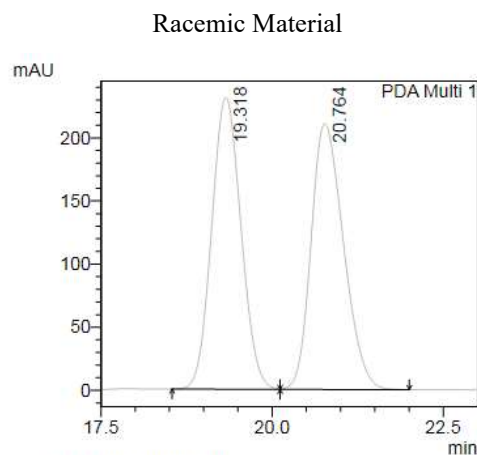

1 PDA Multi 1/220nm 4nm

| PeakTable |           |          |         |
|-----------|-----------|----------|---------|
| Peak#     | Ret. Time | Area     | Area %  |
| 1         | 19.318    | 6880991  | 49.829  |
| 2         | 20.764    | 6928336  | 50.171  |
| Total     |           | 13809327 | 100.000 |

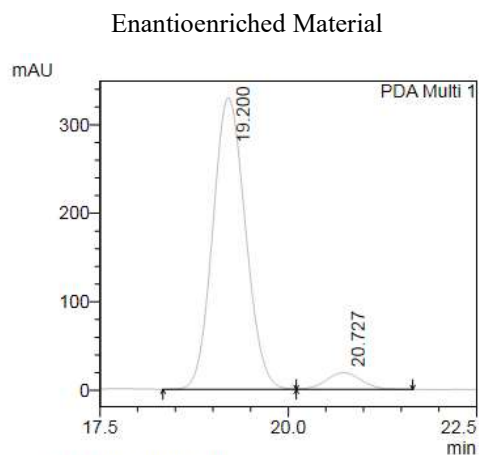

1 PDA Multi 1/220nm 4nm

| PeakTable |           |          |         |
|-----------|-----------|----------|---------|
| Peak#     | Ret. Time | Area     | Area %  |
| 1         | 19.200    | 9949750  | 94.135  |
| 2         | 20.727    | 619901   | 5.865   |
| Total     |           | 10569651 | 100.000 |

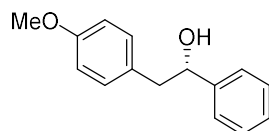

**(S)-2-(4-Methoxyphenyl)-1-phenylethan-1-ol (5d).**

General procedure G was followed on a 50 mg (0.12 mmol) scale of **4c** (91% ee) with PhMgBr, which after flash chromatography on silica gel (eluting with hexanes/EtOAc = 85:15) afforded 13 mg (48%) of the product as a colorless oil. Absolute stereochemistry was assigned by comparing the order of elution of each enantiomer on OD-H column with the literature results.<sup>32</sup>

<sup>1</sup>H NMR (400 MHz, CDCl<sub>3</sub>) δ 7.42 – 7.27 (m, 5H), 7.14 – 7.08 (m, 2H), 6.88 – 6.80 (m, 2H), 4.86 (ddd, *J* = 8.1, 4.8, 2.9 Hz, 1H), 3.80 (s, 3H), 3.00 (dd, *J* = 13.8, 4.8 Hz, 1H), 2.93 (dd, *J* = 13.8, 8.5 Hz, 1H), 1.91 (d, *J* = 3.0 Hz, 1H).

<sup>13</sup>C NMR (151 MHz, CDCl<sub>3</sub>) δ 158.50, 143.96, 130.62, 130.07, 128.53, 127.71, 126.04, 114.06, 75.56, 55.39, 45.32.

ESI MS calcd for C<sub>15</sub>H<sub>15</sub>O<sup>+</sup> [M–OH]<sup>+</sup> 211.11, found 211.2.

Chiral HPLC CHIRALCEL® OD-H, 3.0% IPA in hexane, 1.3 mL/min, 220 nm: 89% ee, 98% es

### Racemic Material

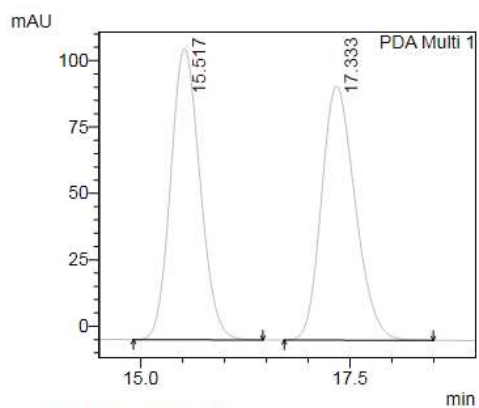

1 PDA Multi 1/220nm 4nm

PeakTable

| Peak# | Ret. Time | Area    | Area %  |
|-------|-----------|---------|---------|
| 1     | 15.517    | 2674004 | 49.928  |
| 2     | 17.333    | 2681738 | 50.072  |
| Total |           | 5355742 | 100.000 |

### Enantioenriched Material

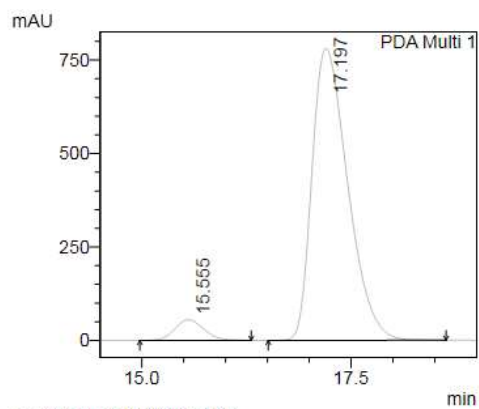

1 PDA Multi 1/220nm 4nm

PeakTable

| Peak# | Ret. Time | Area     | Area %  |
|-------|-----------|----------|---------|
| 1     | 15.555    | 1334536  | 5.439   |
| 2     | 17.197    | 23203372 | 94.561  |
| Total |           | 24537908 | 100.000 |

# NMR Spectra

$^1\text{H}$  NMR (400 MHz,  $\text{CDCl}_3$ )

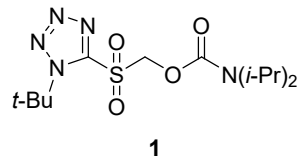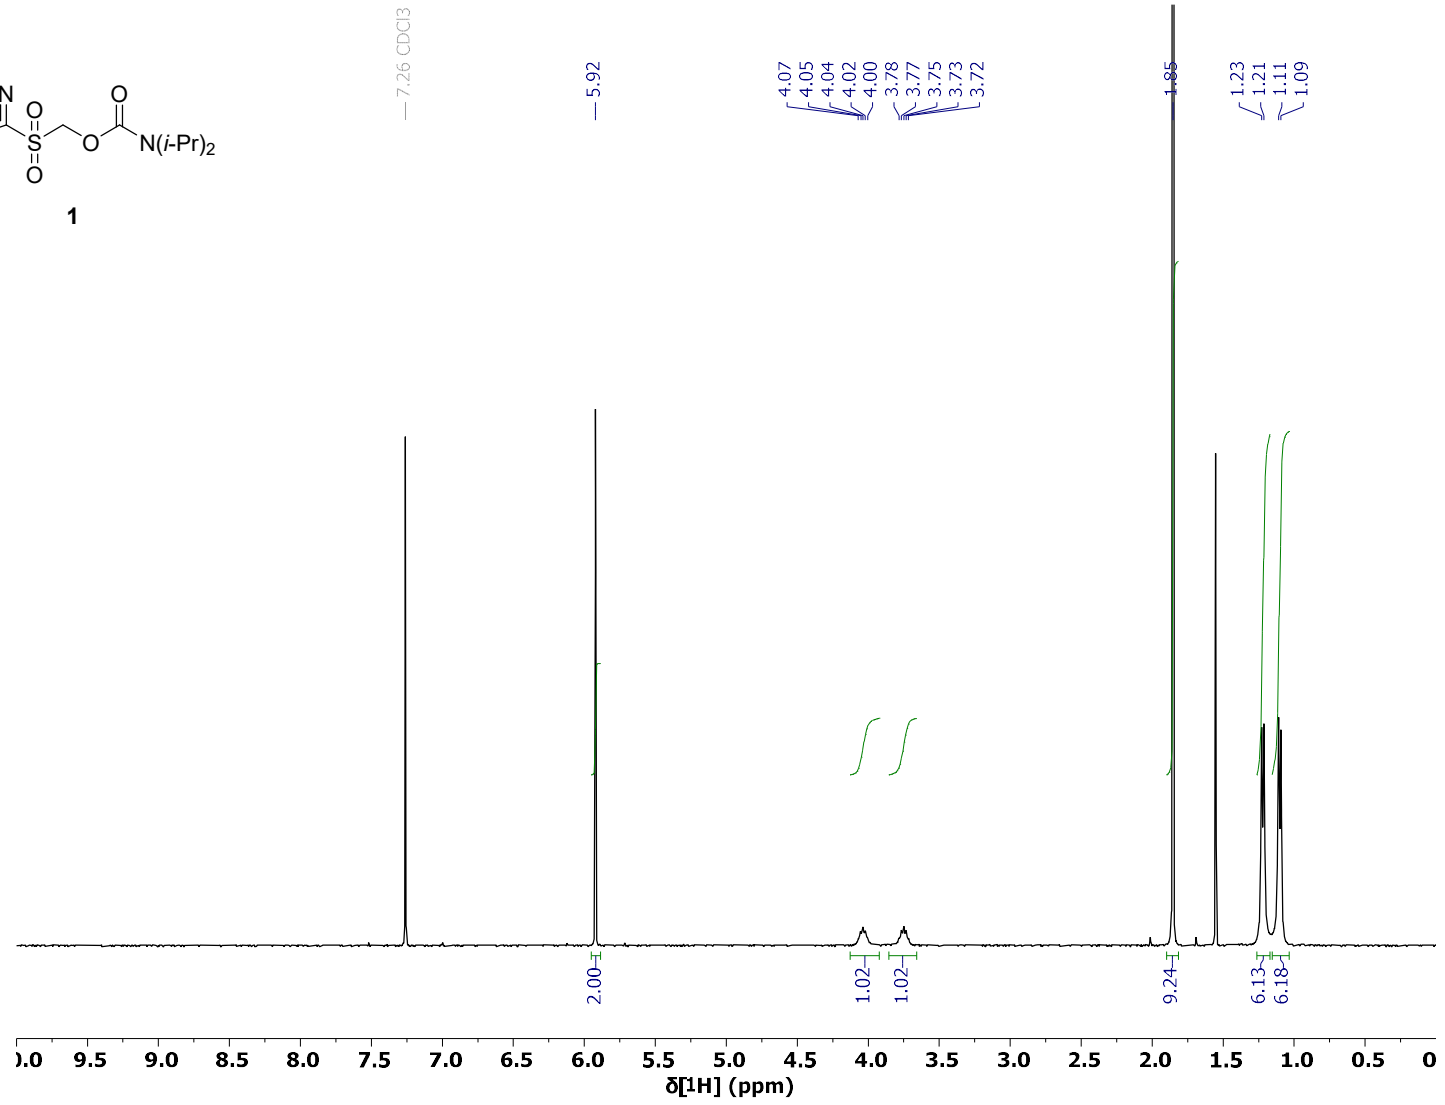



$^{13}\text{C}$  NMR (101 MHz,  $\text{CDCl}_3$ )

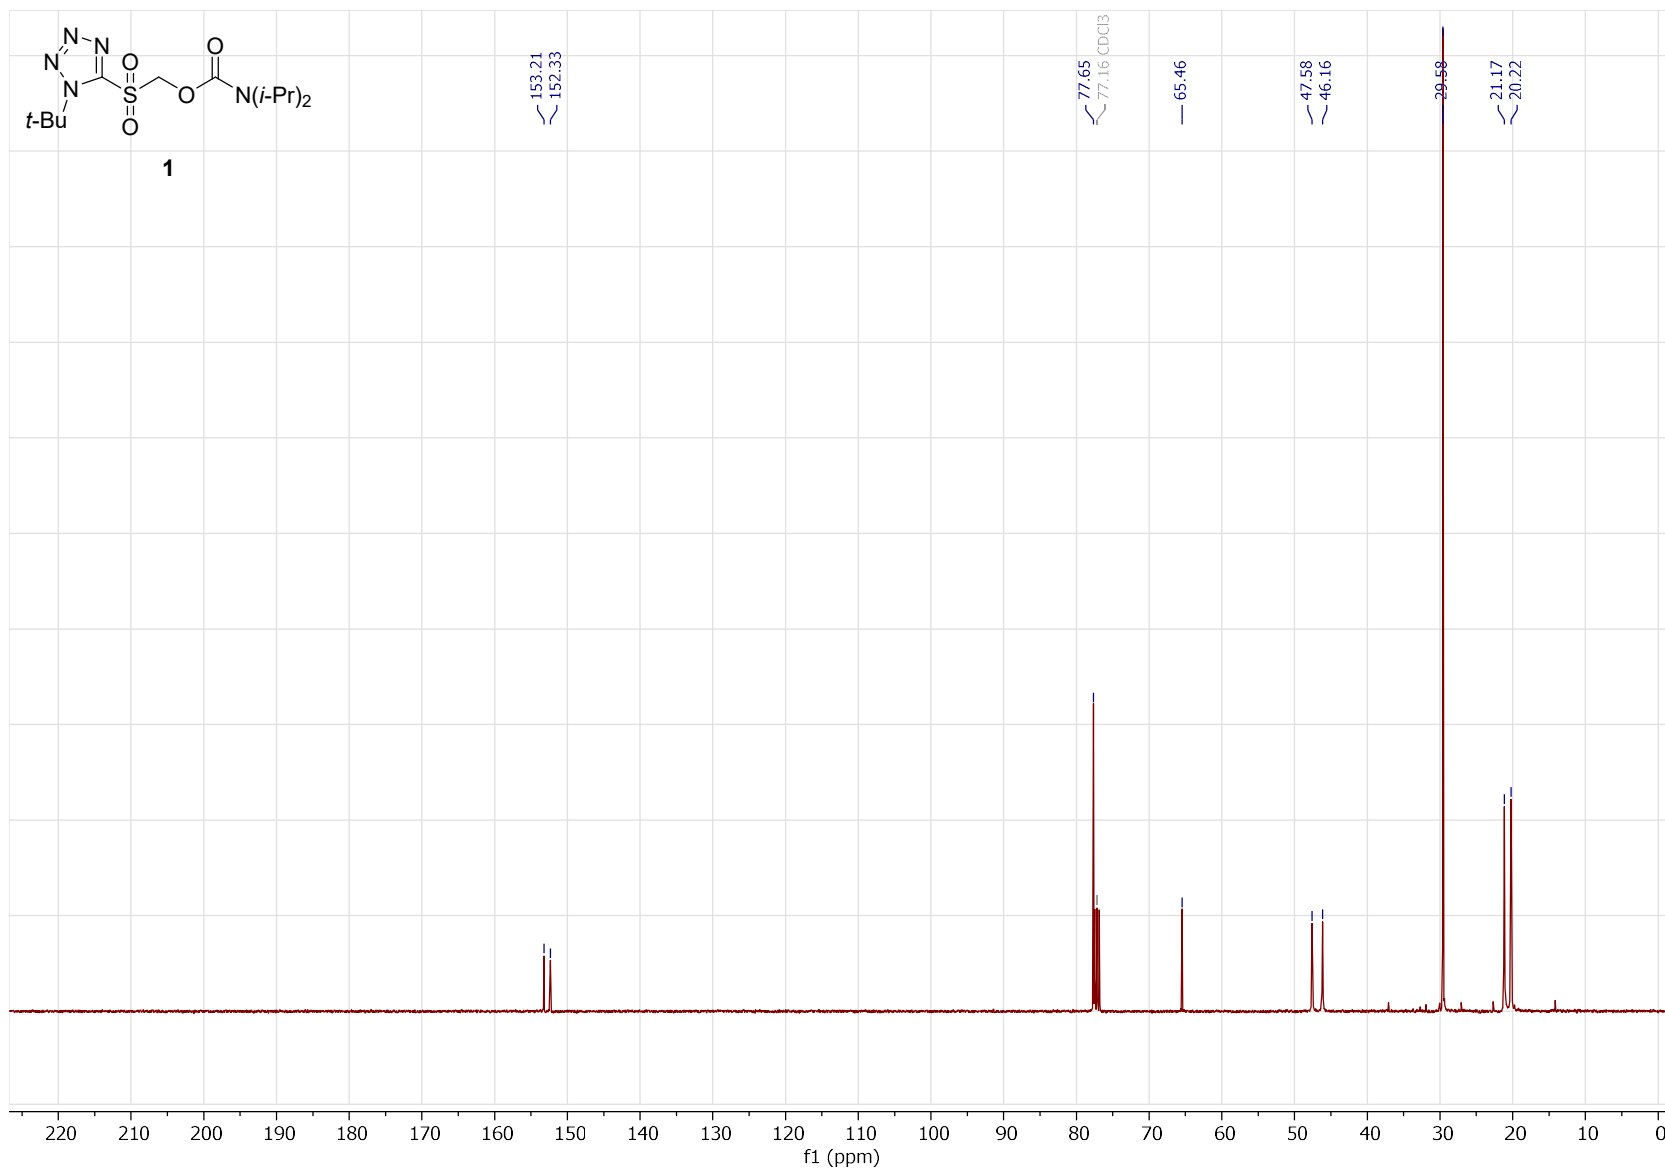

$^1\text{H}$  NMR (400 MHz,  $\text{CDCl}_3$ )

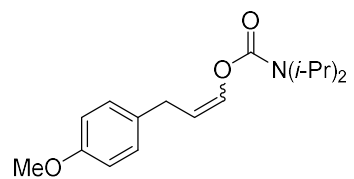

**3a**, Z : E = 80 : 20

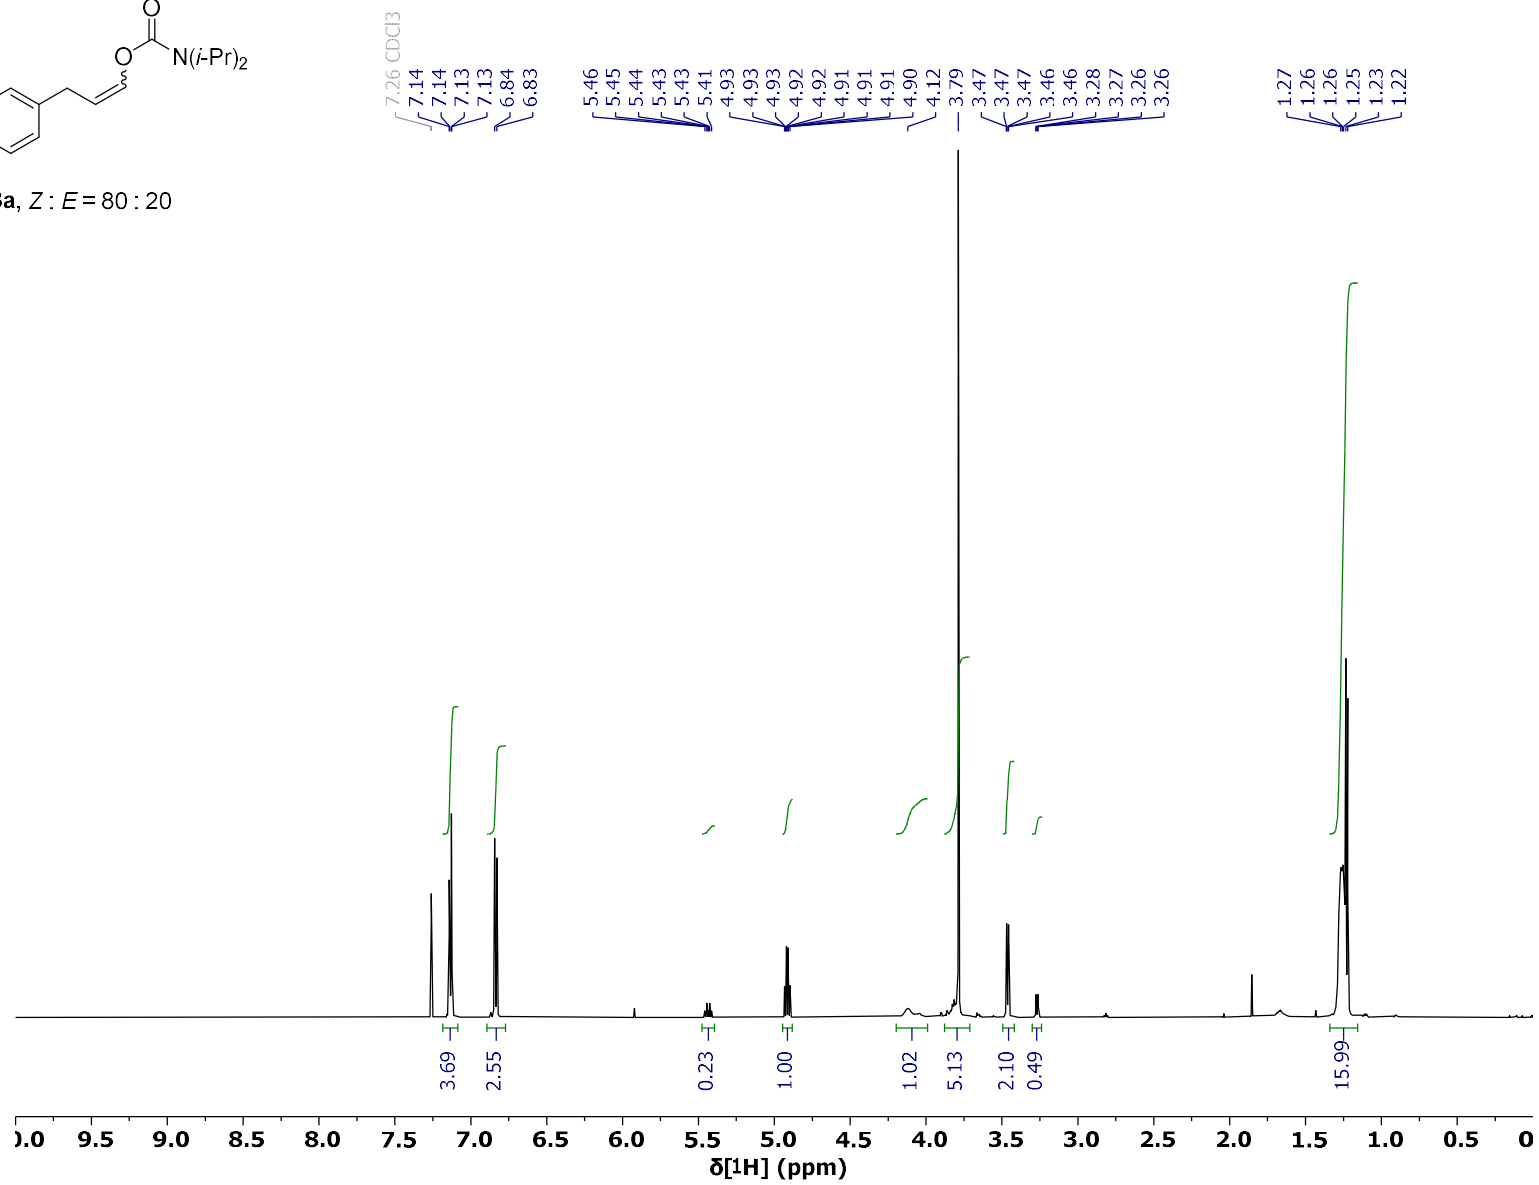

<sup>13</sup>C NMR (151 MHz, CDCl<sub>3</sub>)

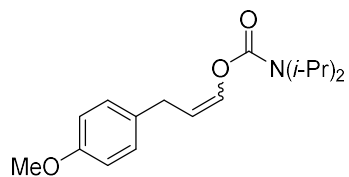

3a, Z : E = 80 : 20

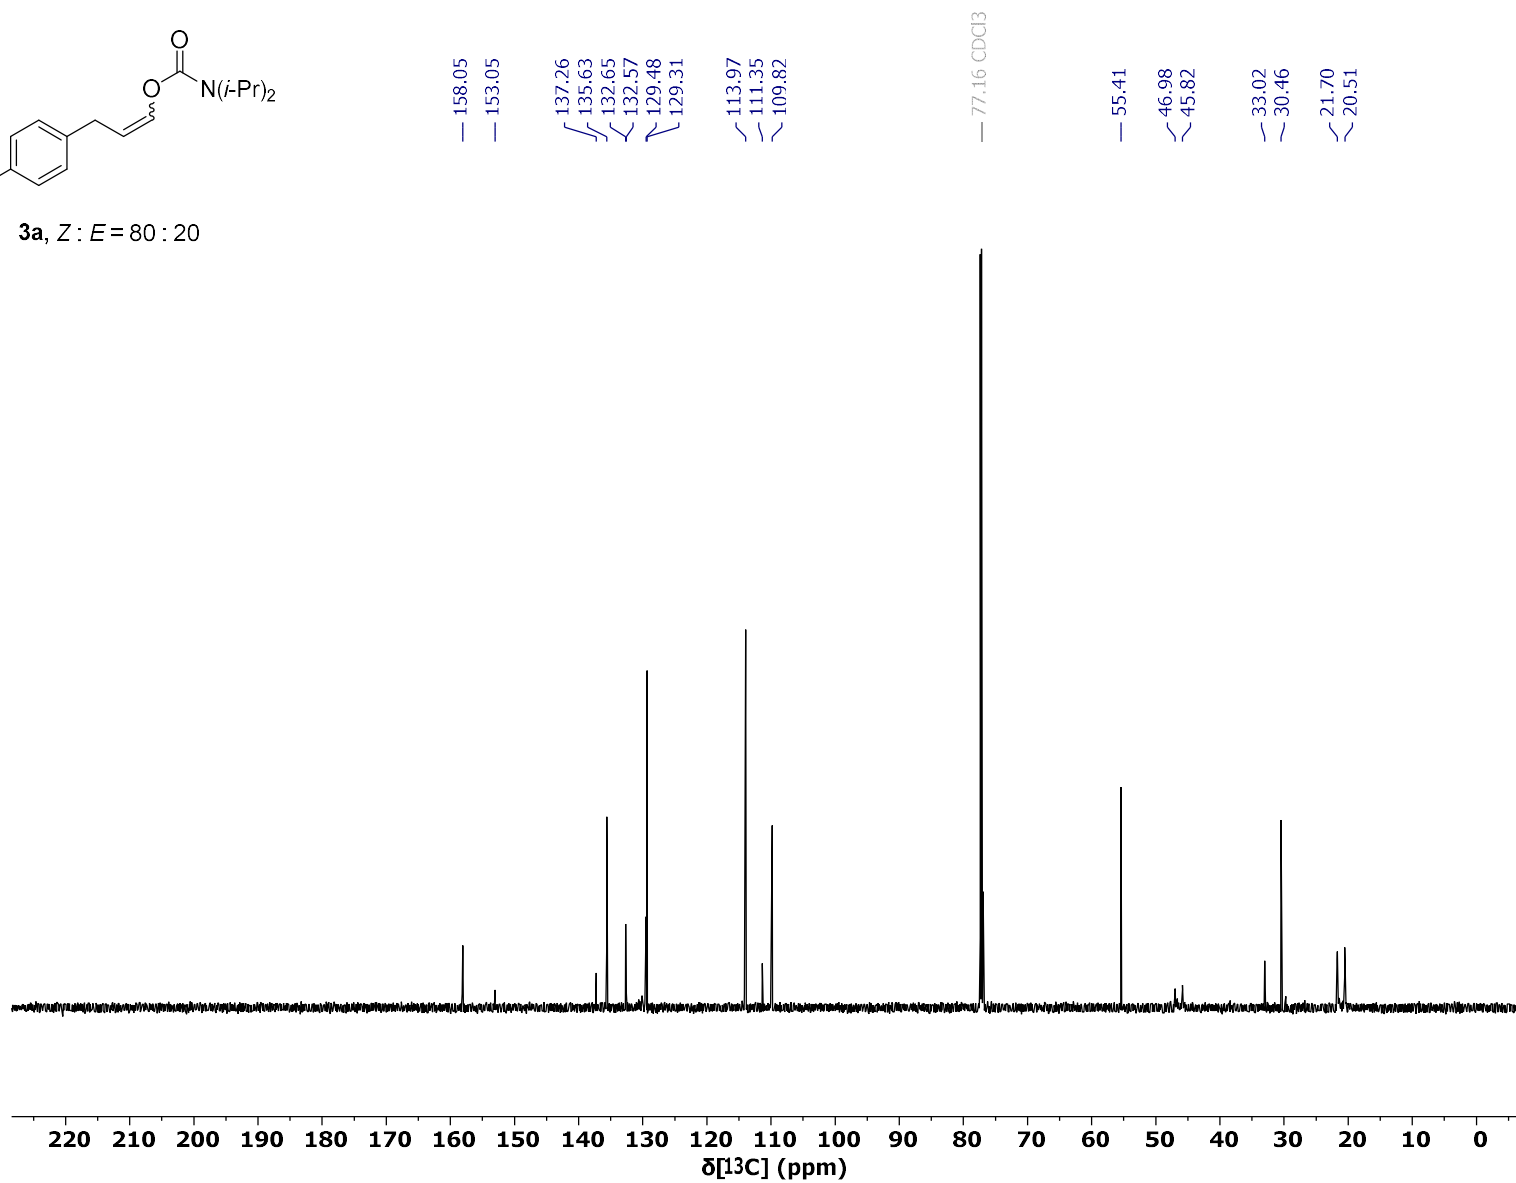

<sup>1</sup>H NMR (400 MHz, CDCl<sub>3</sub>)

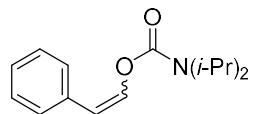

**3b**, Z : E = 80 : 20

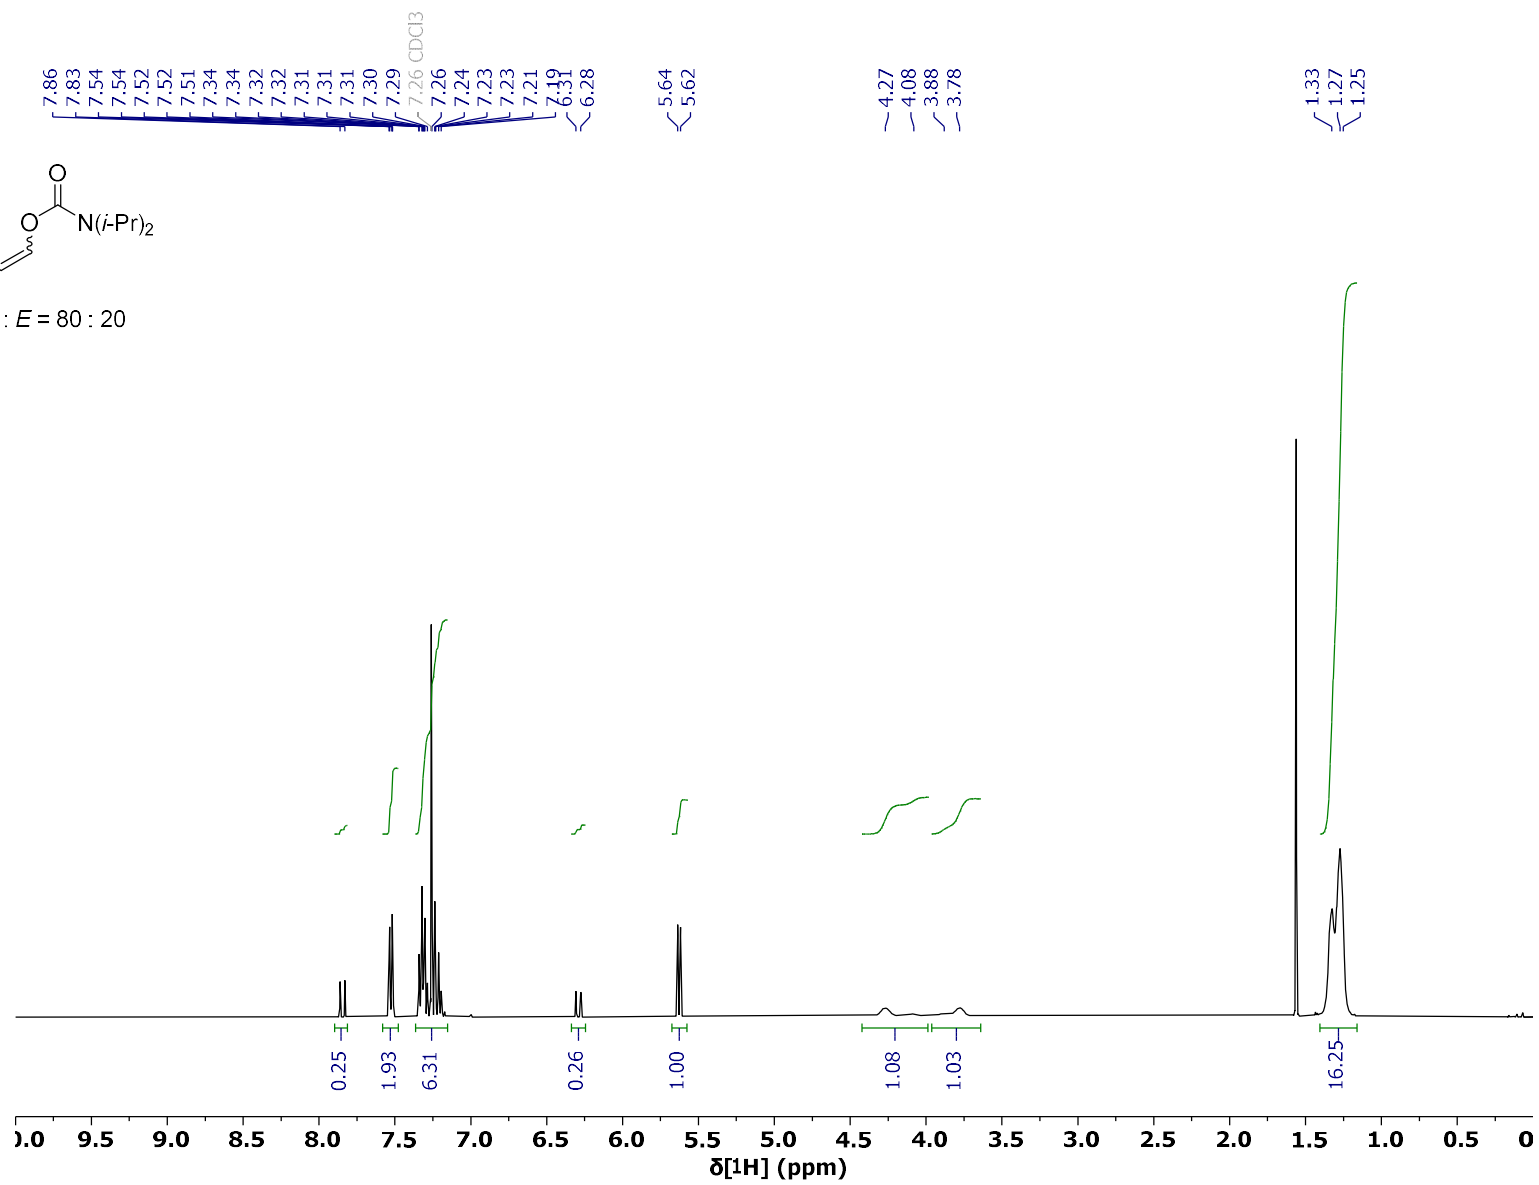

<sup>13</sup>C NMR (151 MHz, CDCl<sub>3</sub>)

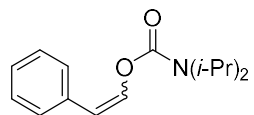

**3b**, Z : E = 80 : 20

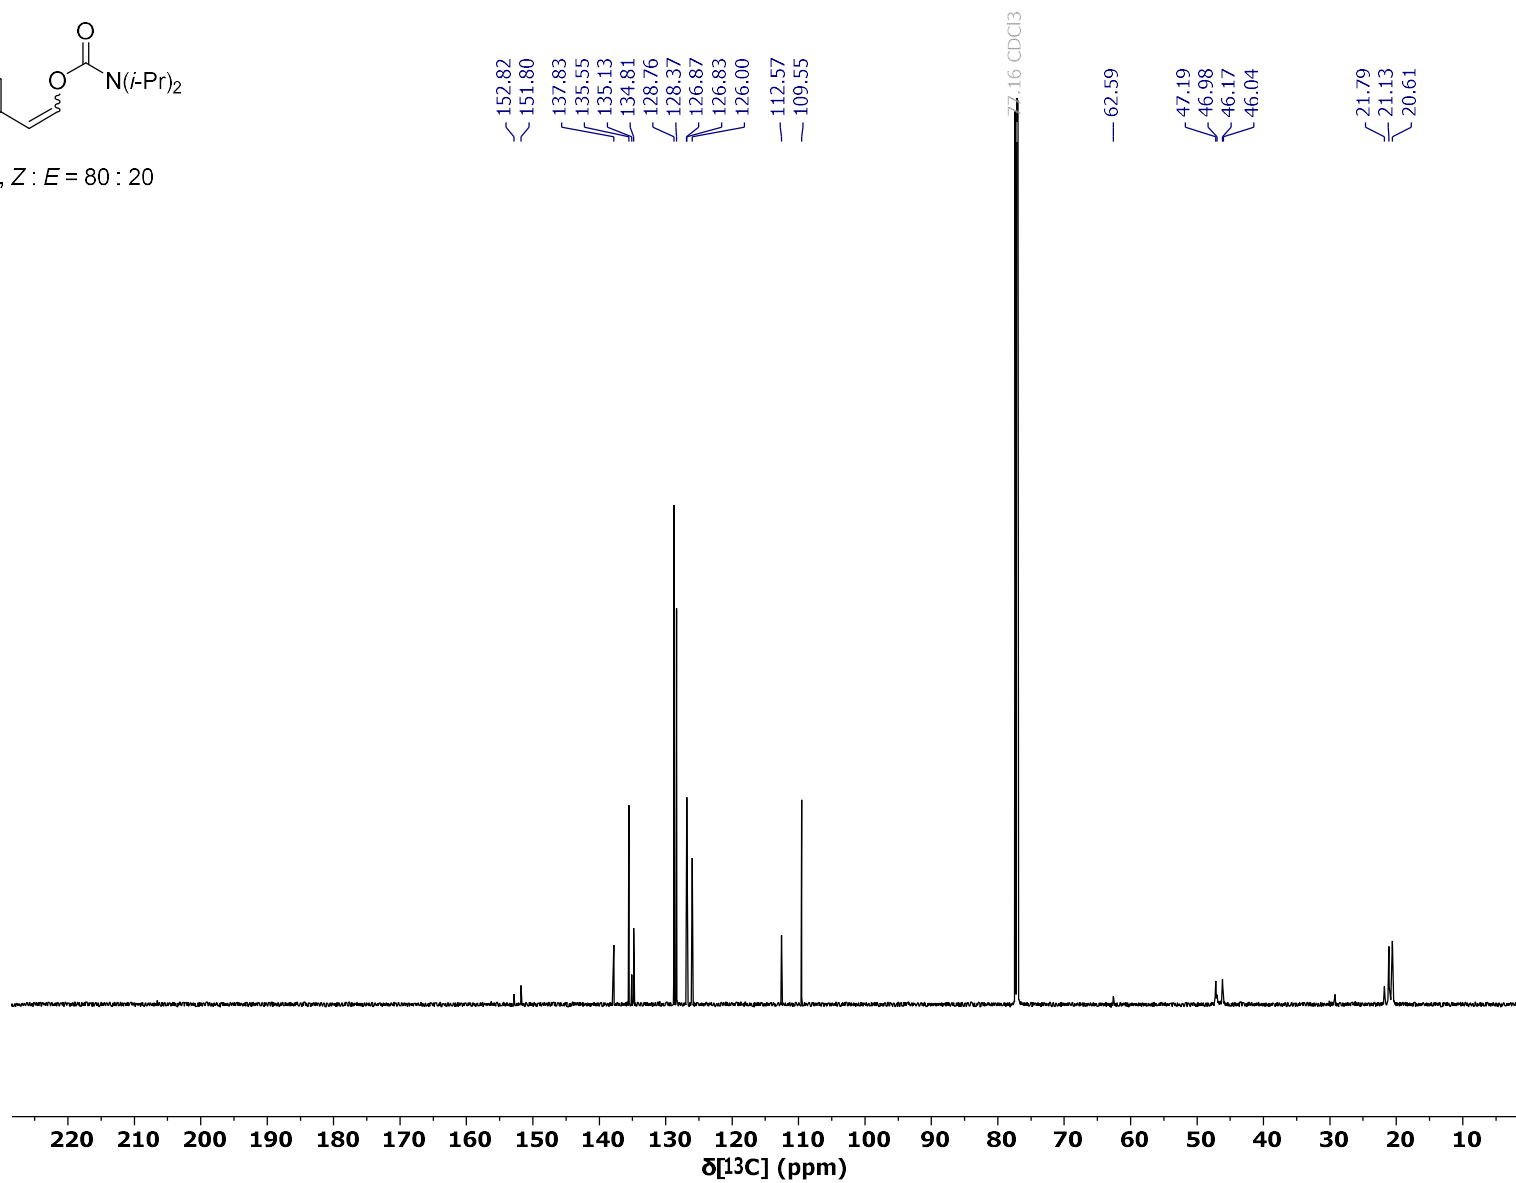

<sup>1</sup>H NMR (400 MHz, CDCl<sub>3</sub>)

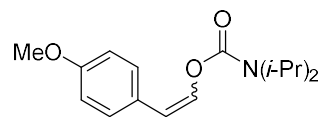

**3c**, Z : E = 75 : 25

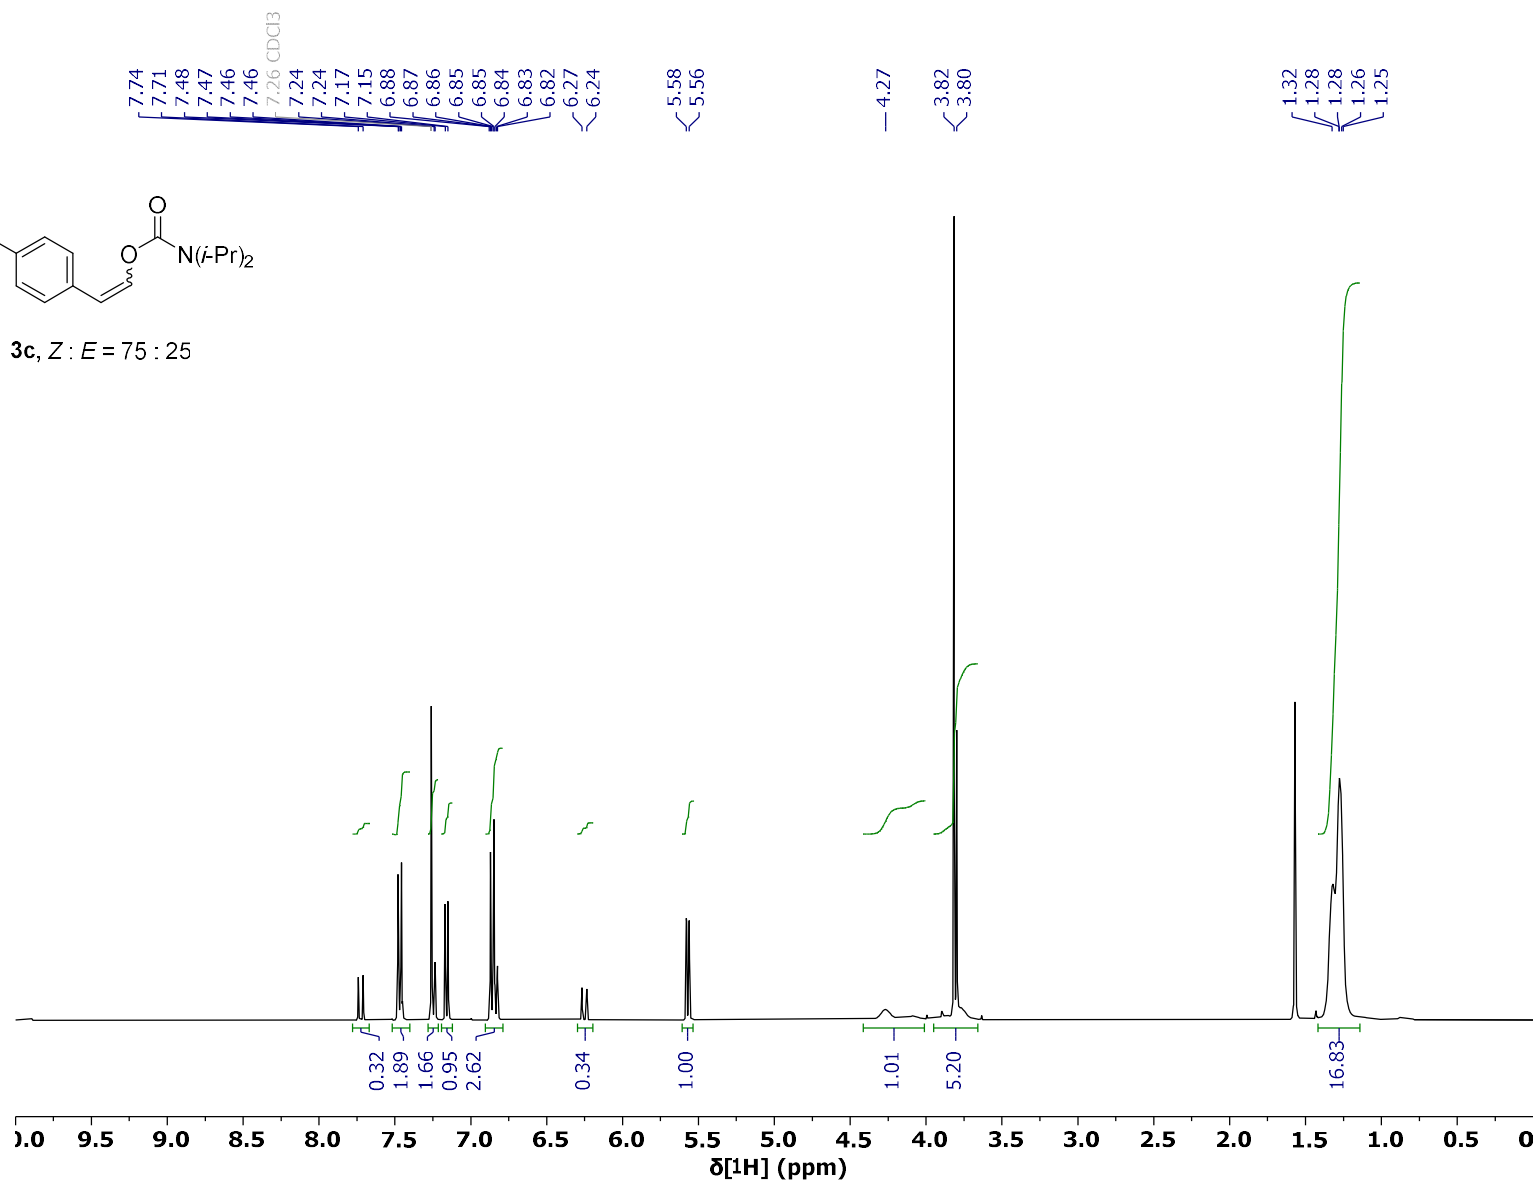

$^{13}\text{C}$  NMR (151 MHz,  $\text{CDCl}_3$ )

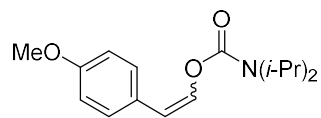

**3c**, Z : E = 75 : 25

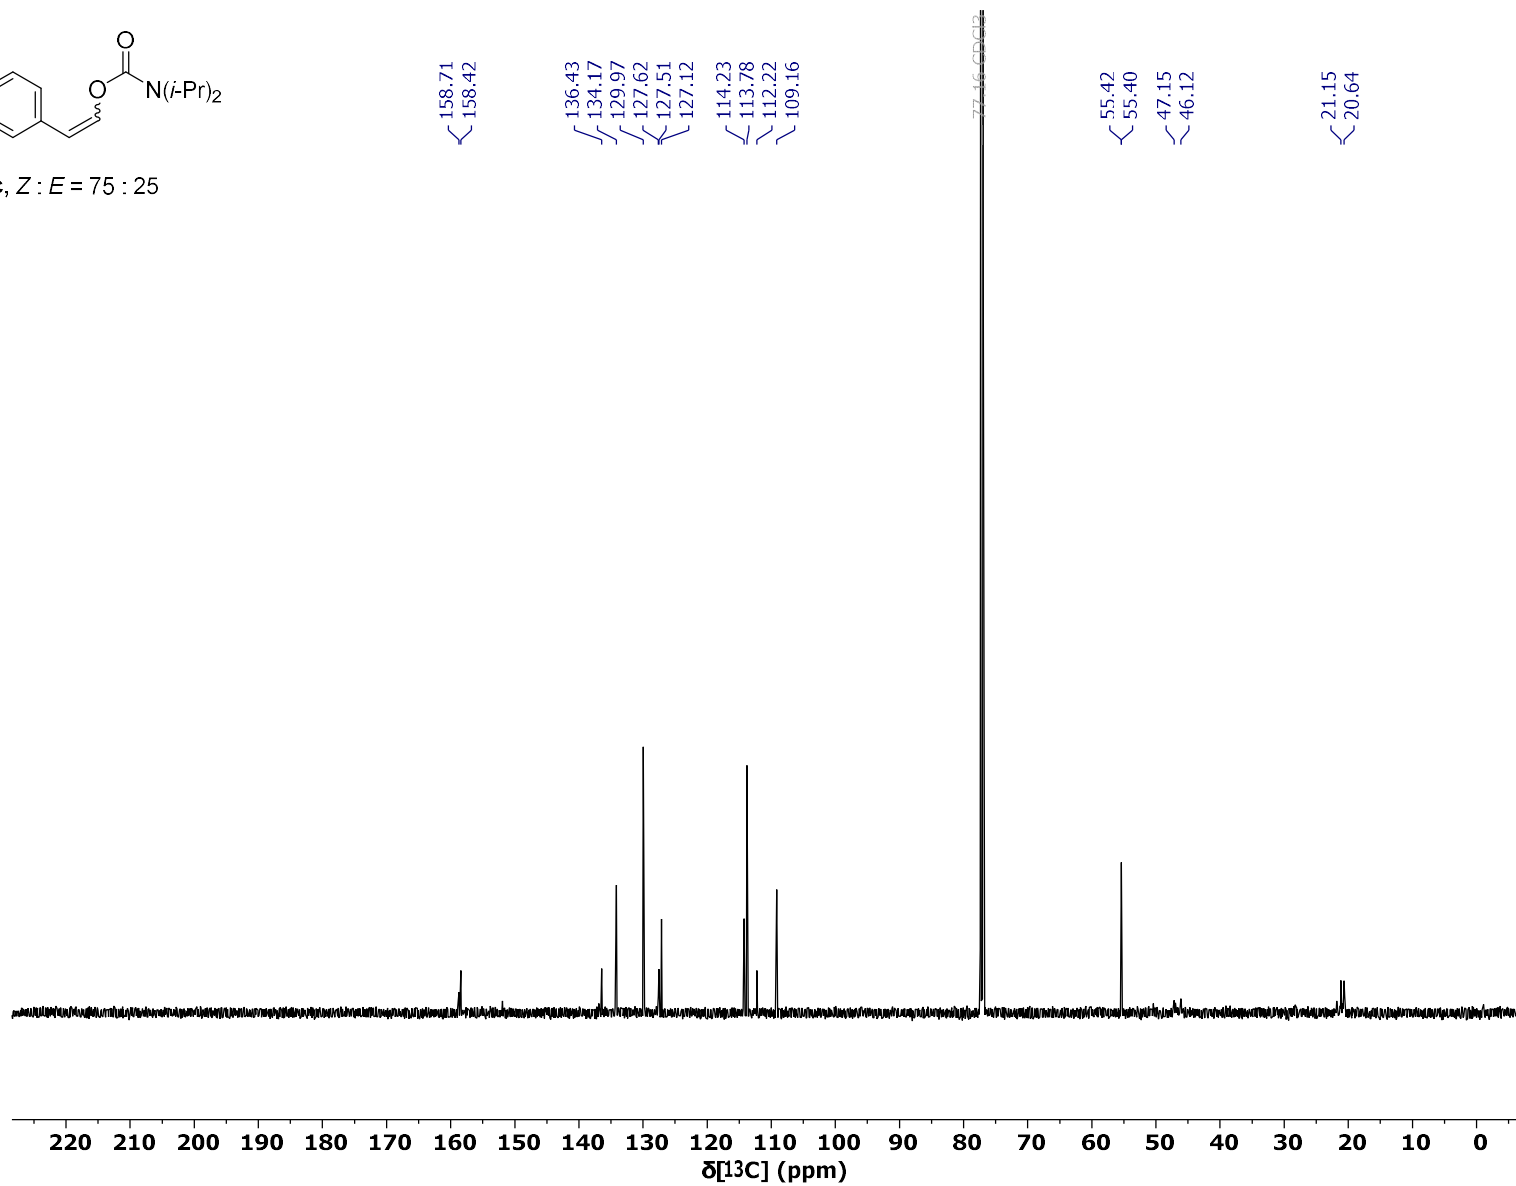

$^1\text{H}$  NMR (400 MHz,  $\text{CDCl}_3$ )

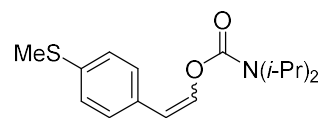

**3d**, Z : E = 80 : 20

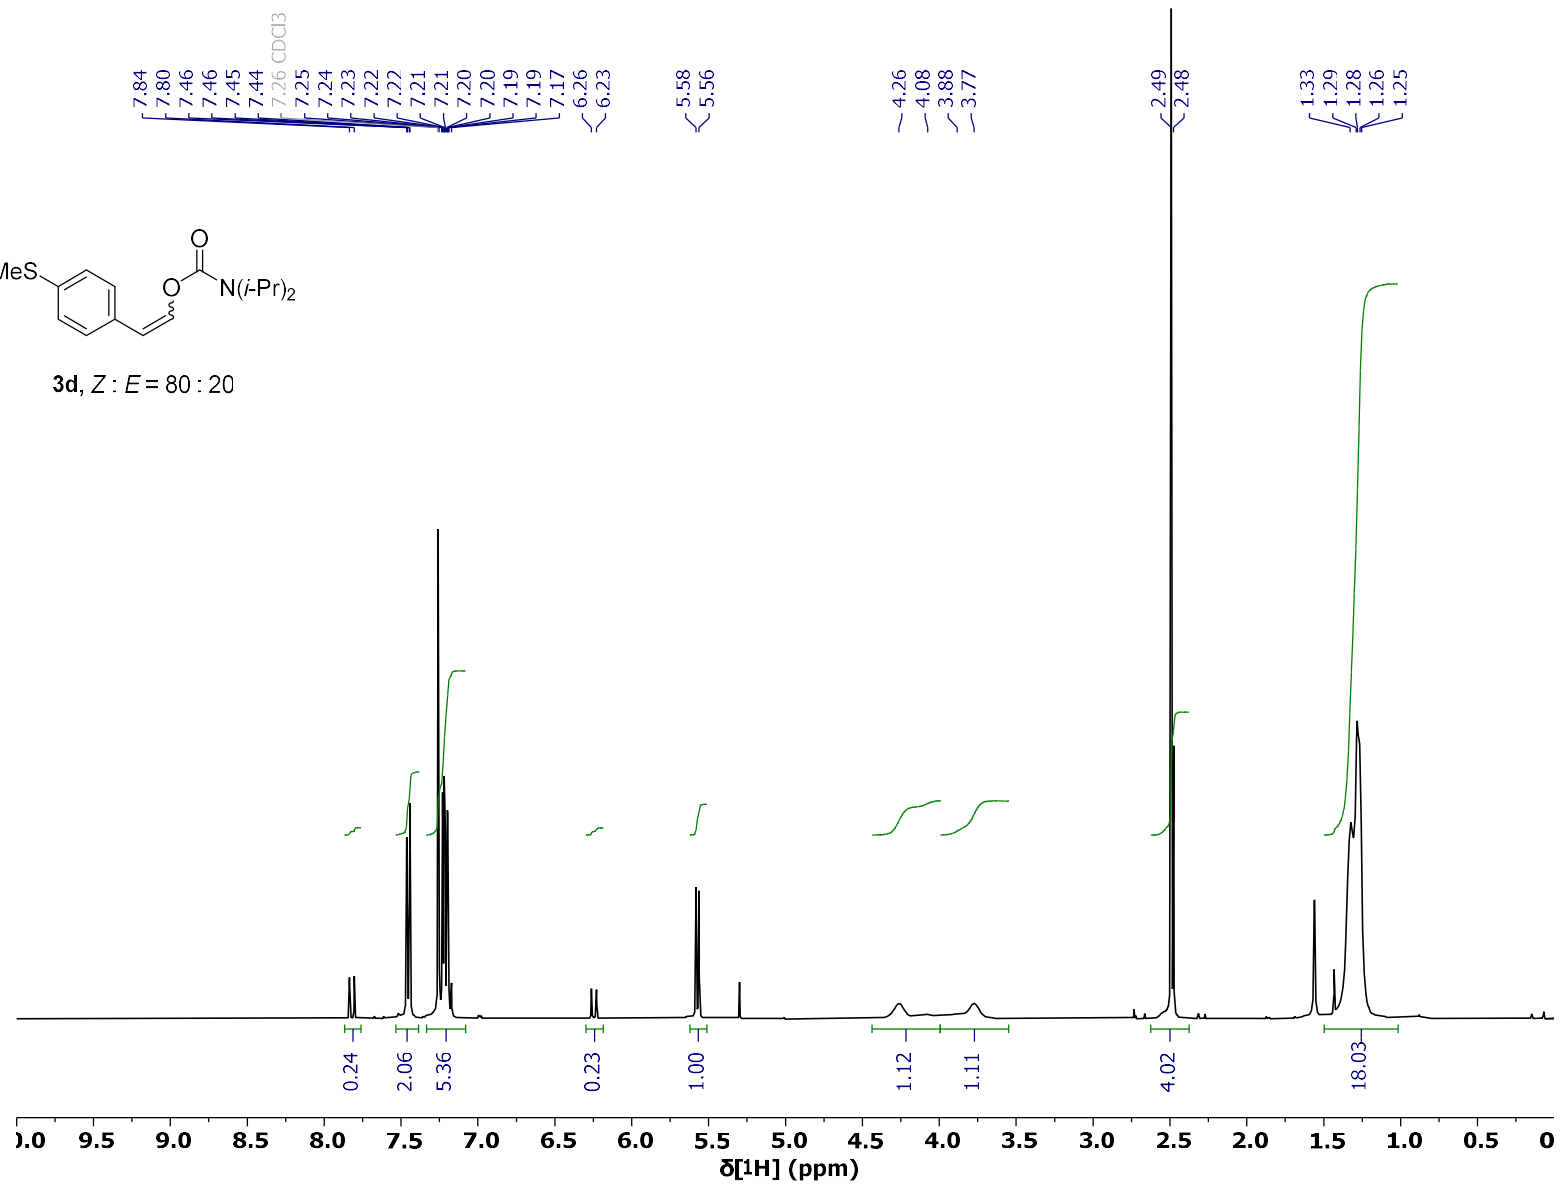

S80



<sup>13</sup>C NMR (151 MHz, CDCl<sub>3</sub>)

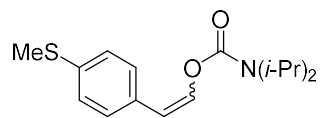

3d, Z : E = 80 : 20

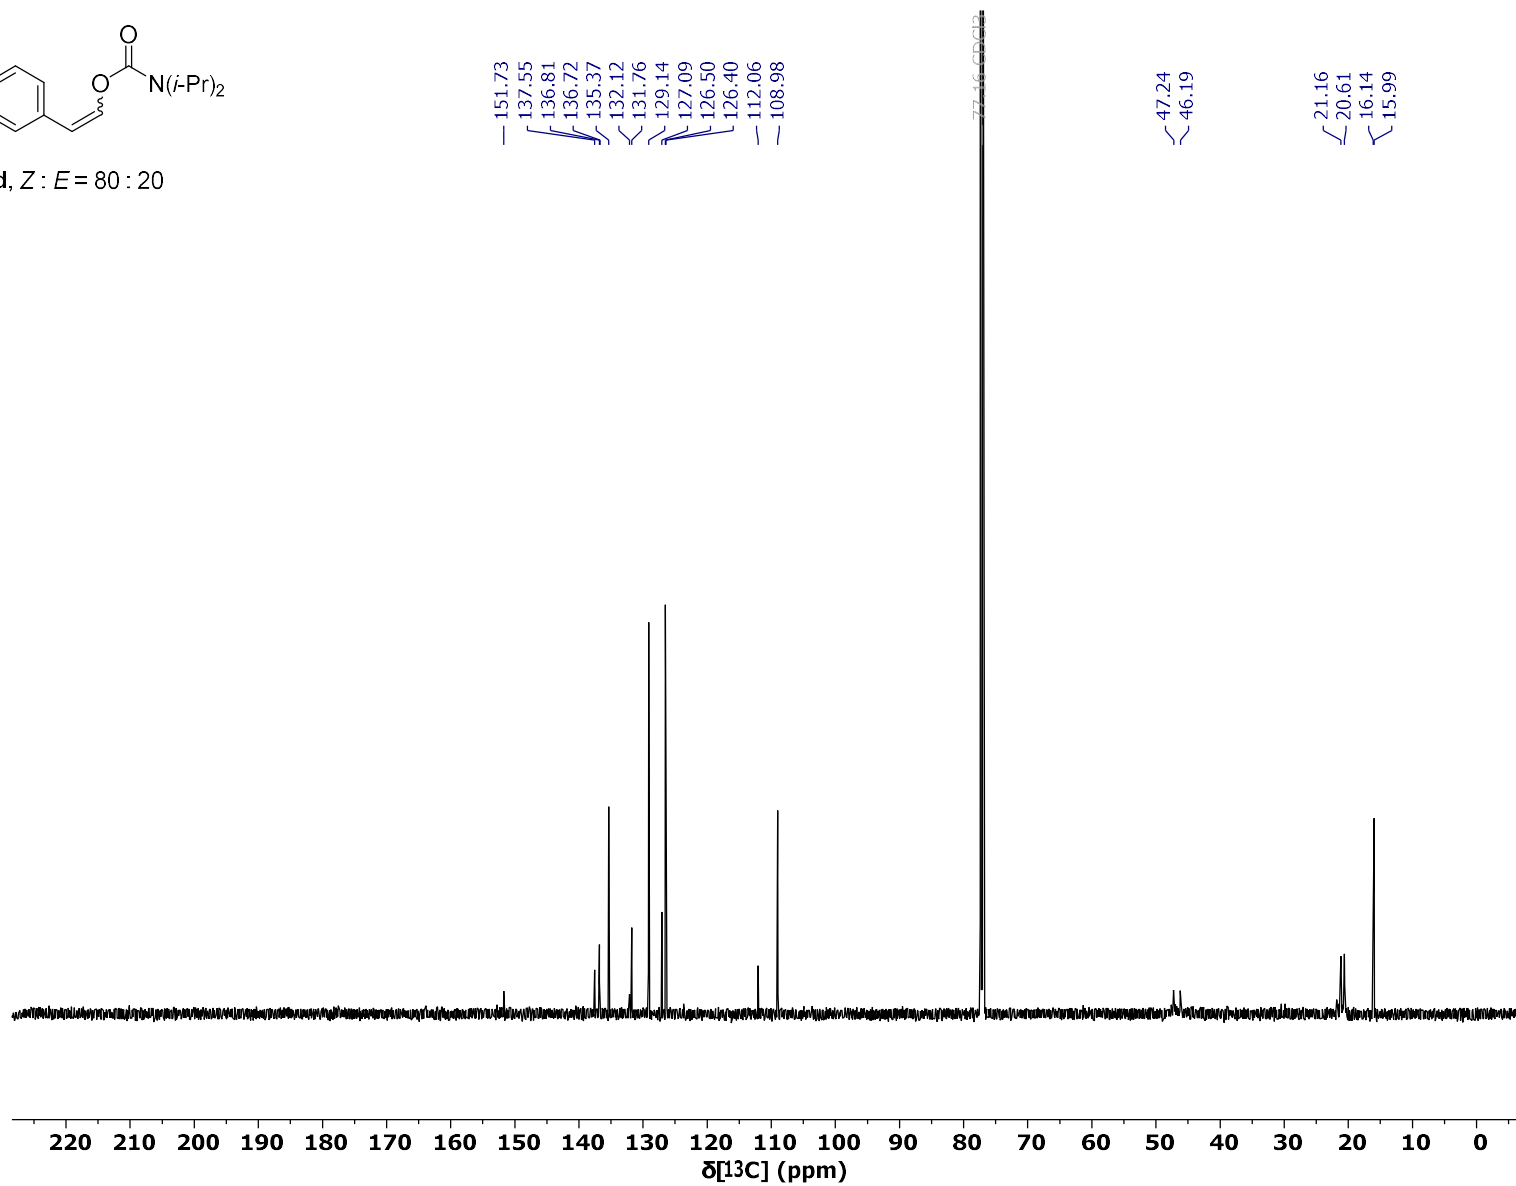

<sup>1</sup>H NMR (400 MHz, CDCl<sub>3</sub>)

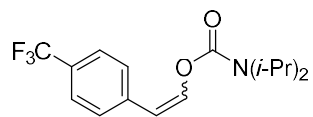

3e, Z : E = 80 : 20

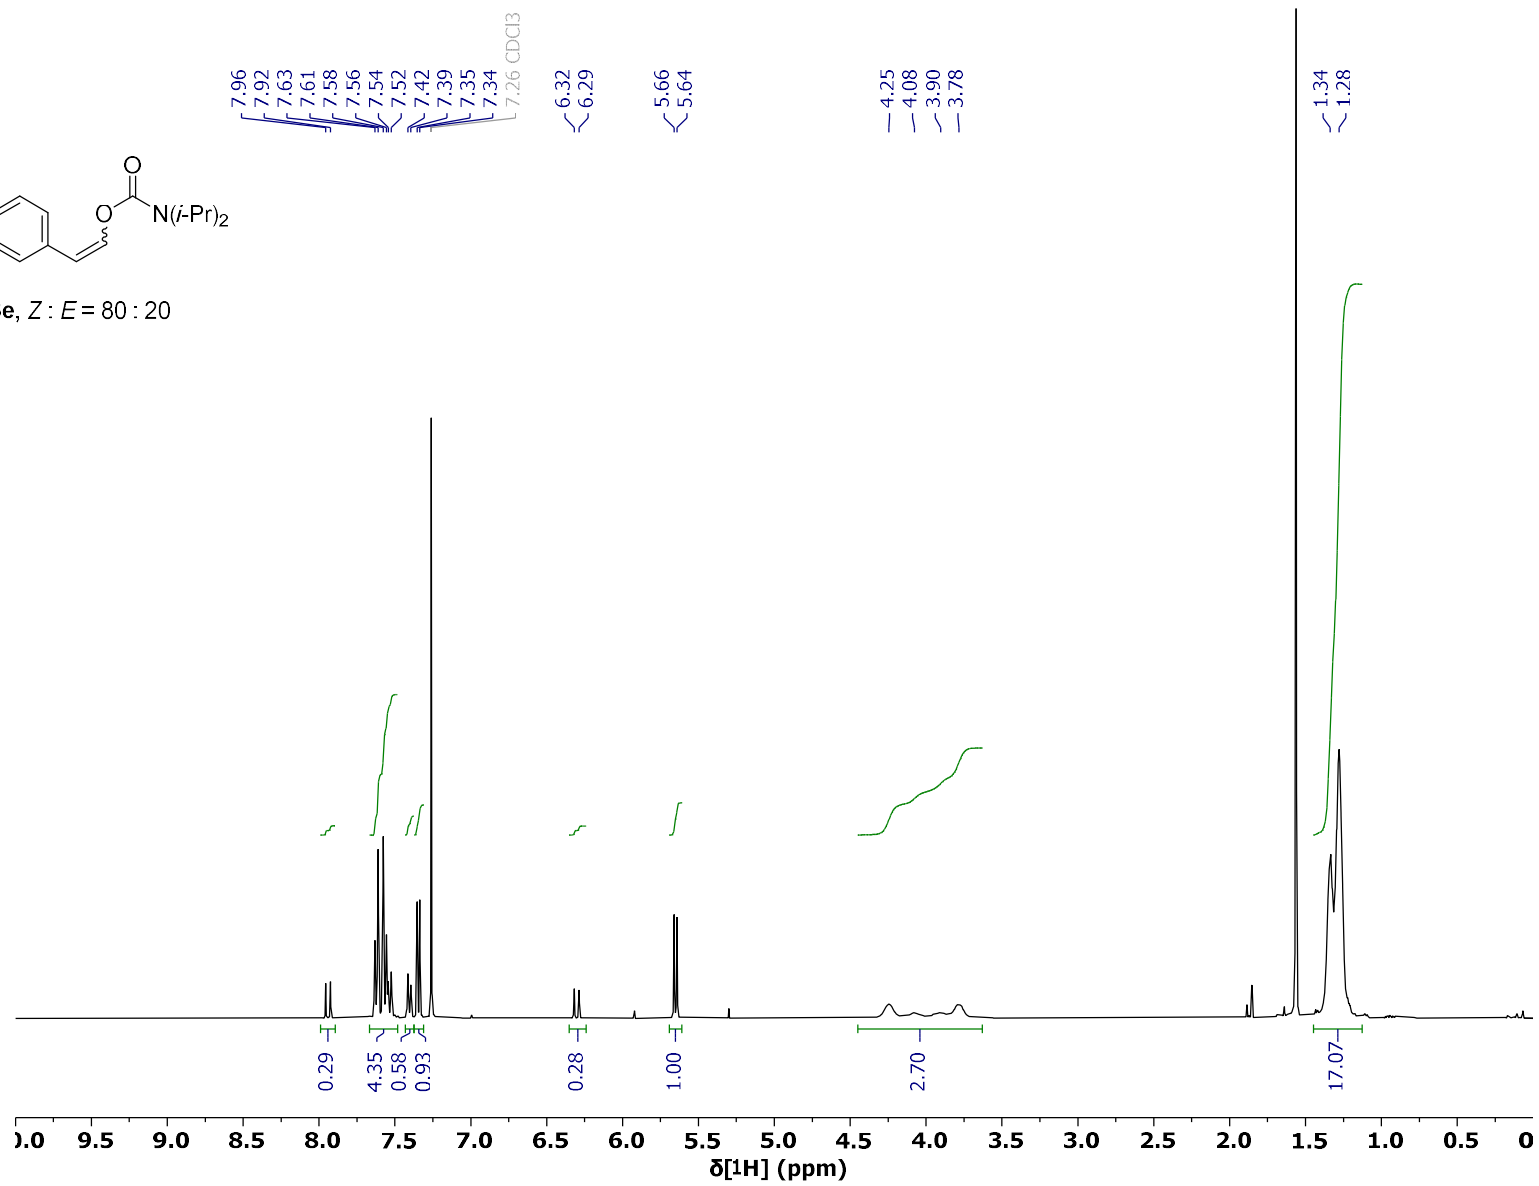

<sup>13</sup>C NMR (151 MHz, CDCl<sub>3</sub>)

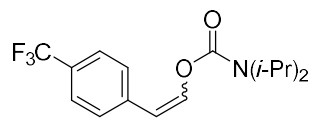

**3e**, Z : E = 80 : 20

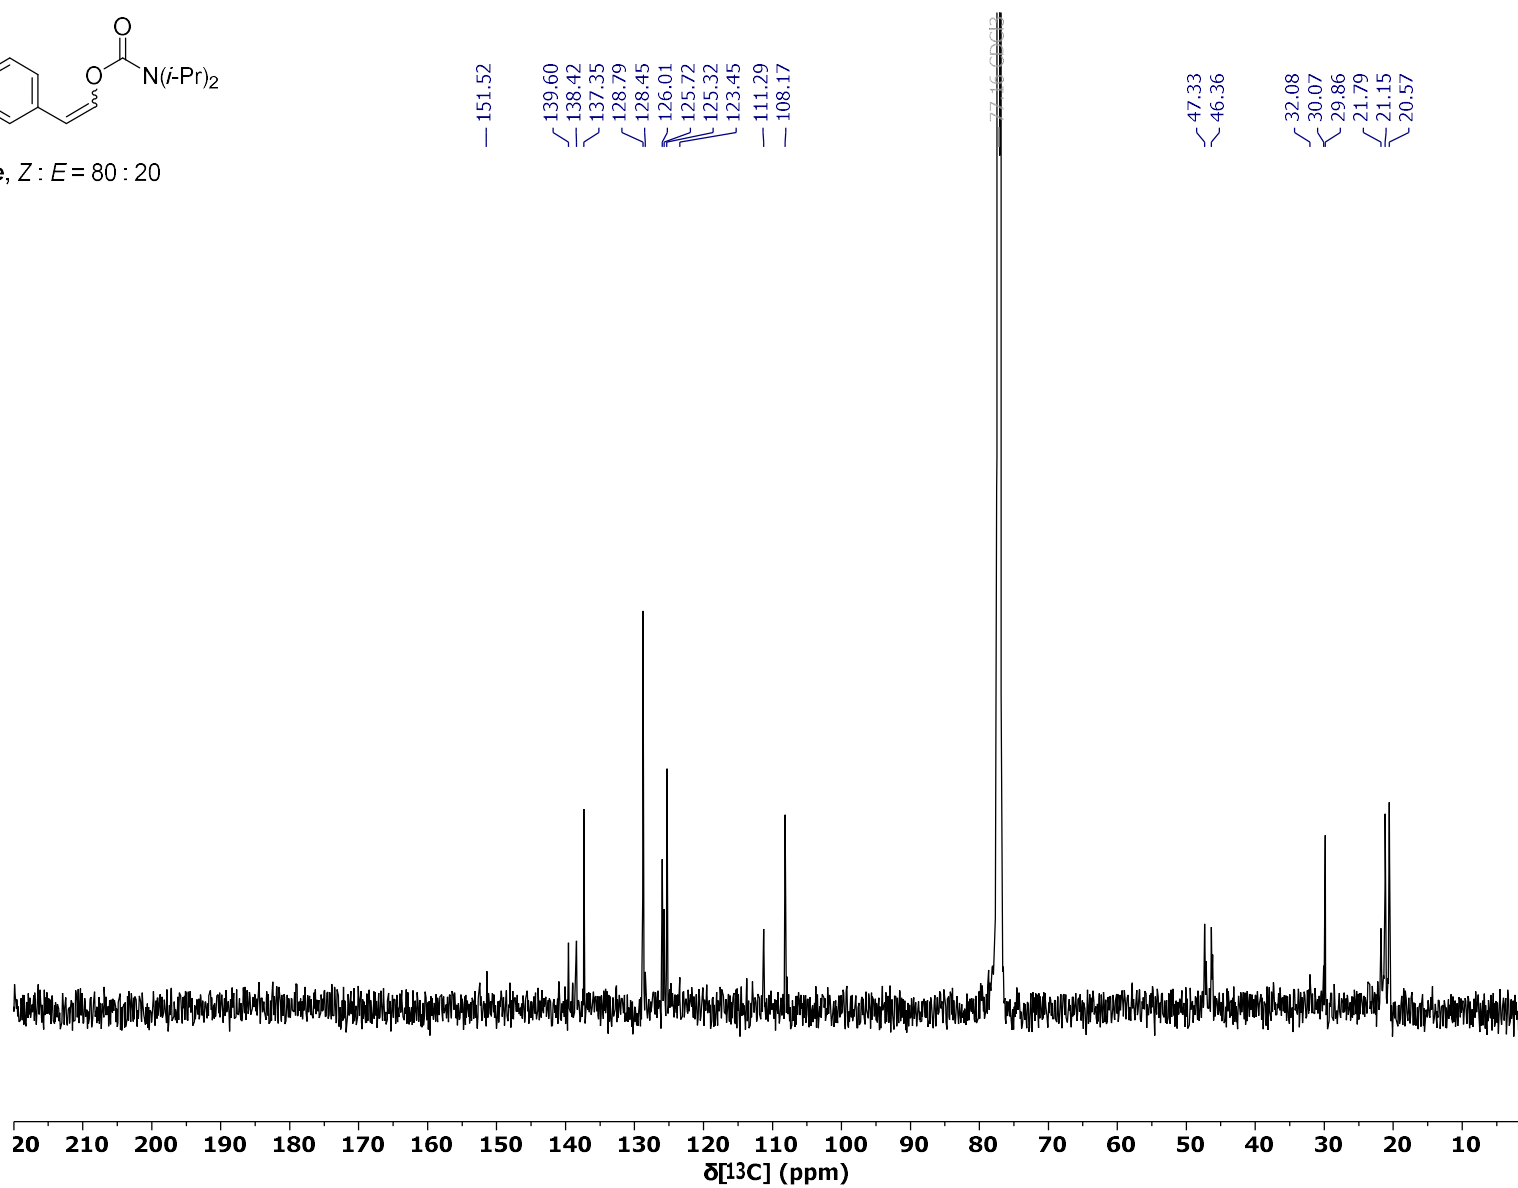

<sup>19</sup>F NMR (376 MHz, CDCl<sub>3</sub>)

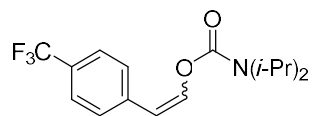

**3e**, Z : E = 80 : 20

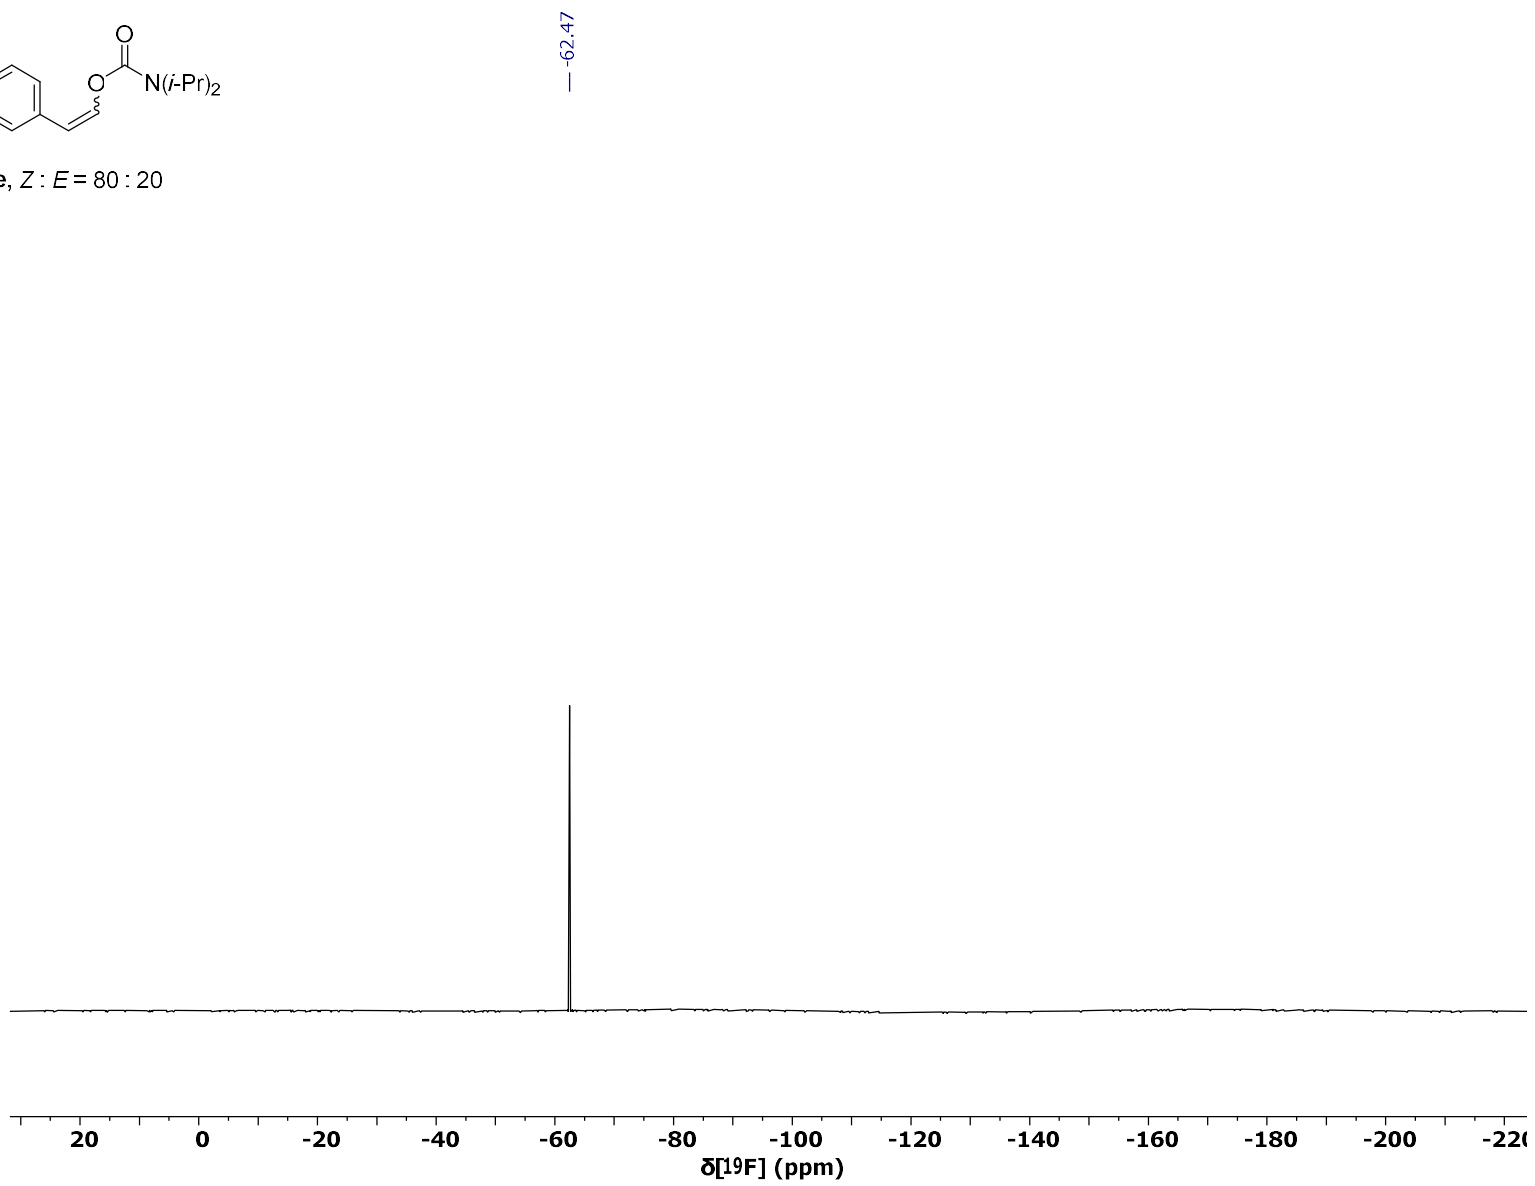

S84

<sup>1</sup>H NMR (400 MHz, CDCl<sub>3</sub>)

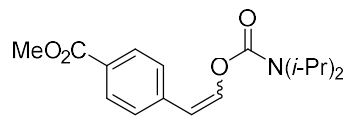

**3f**, Z : E = 80 : 20

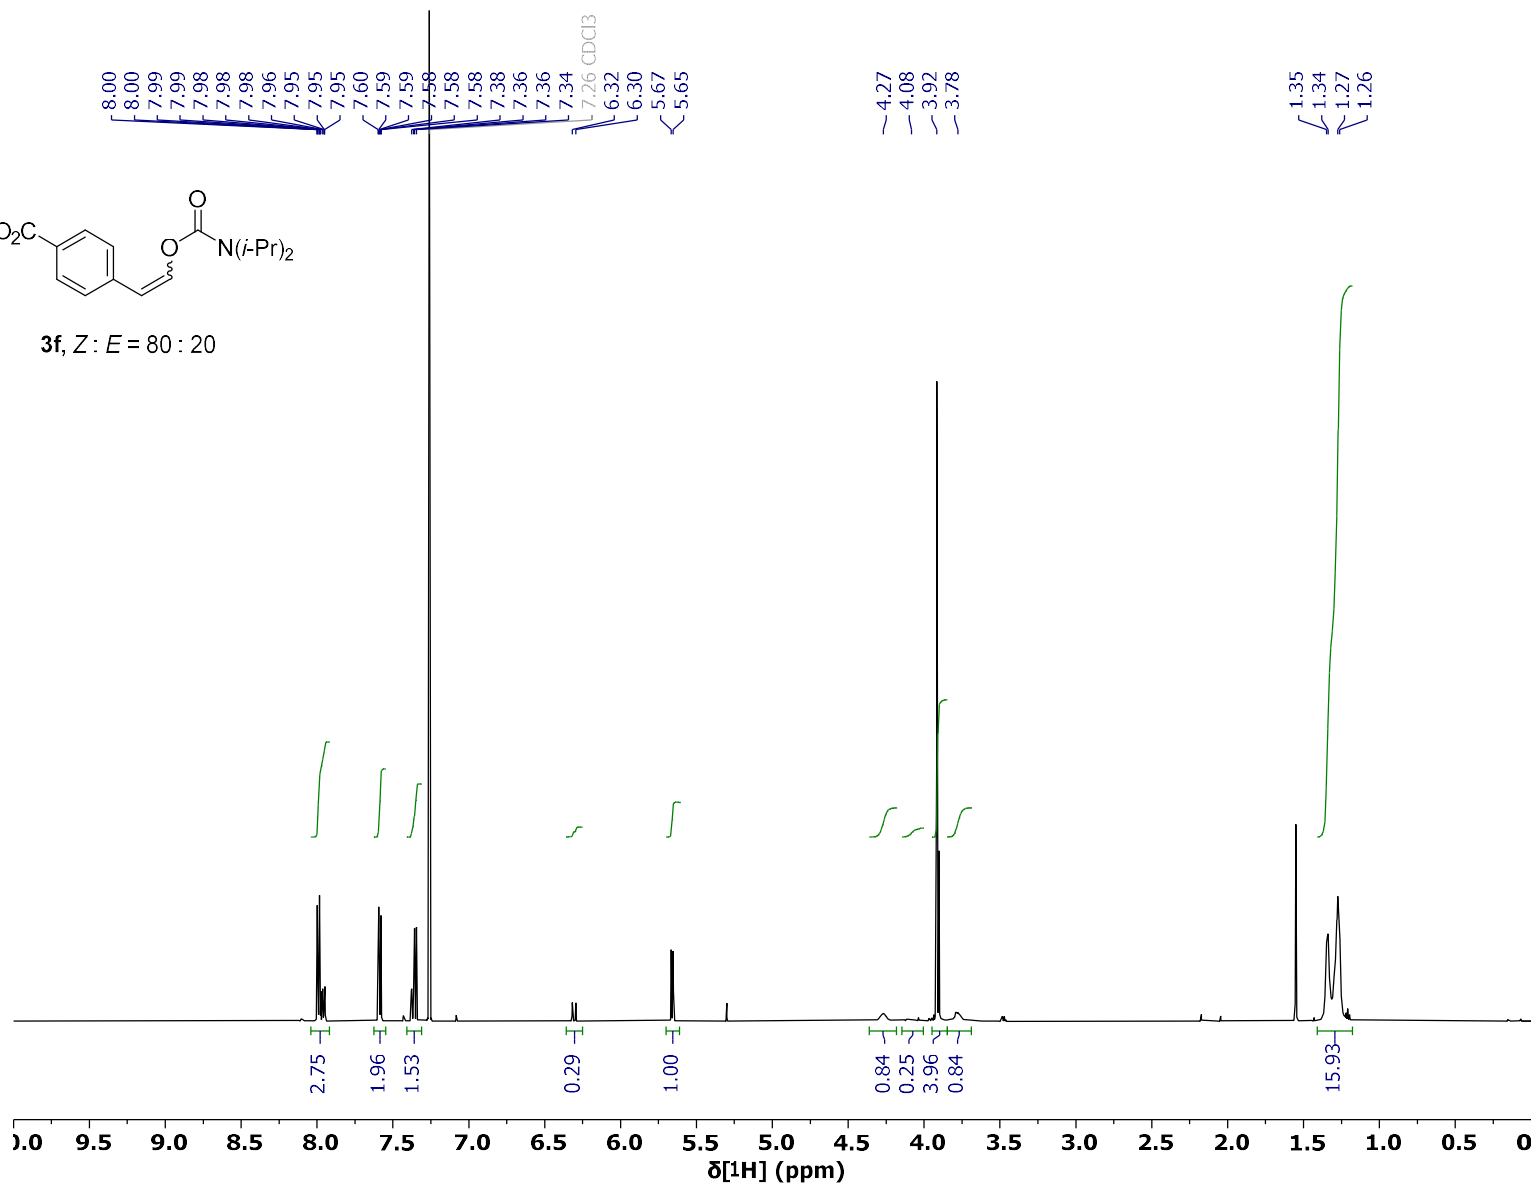

<sup>13</sup>C NMR (151 MHz, CDCl<sub>3</sub>)

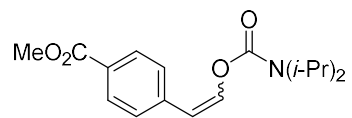

**3f**, Z : E = 80 : 20

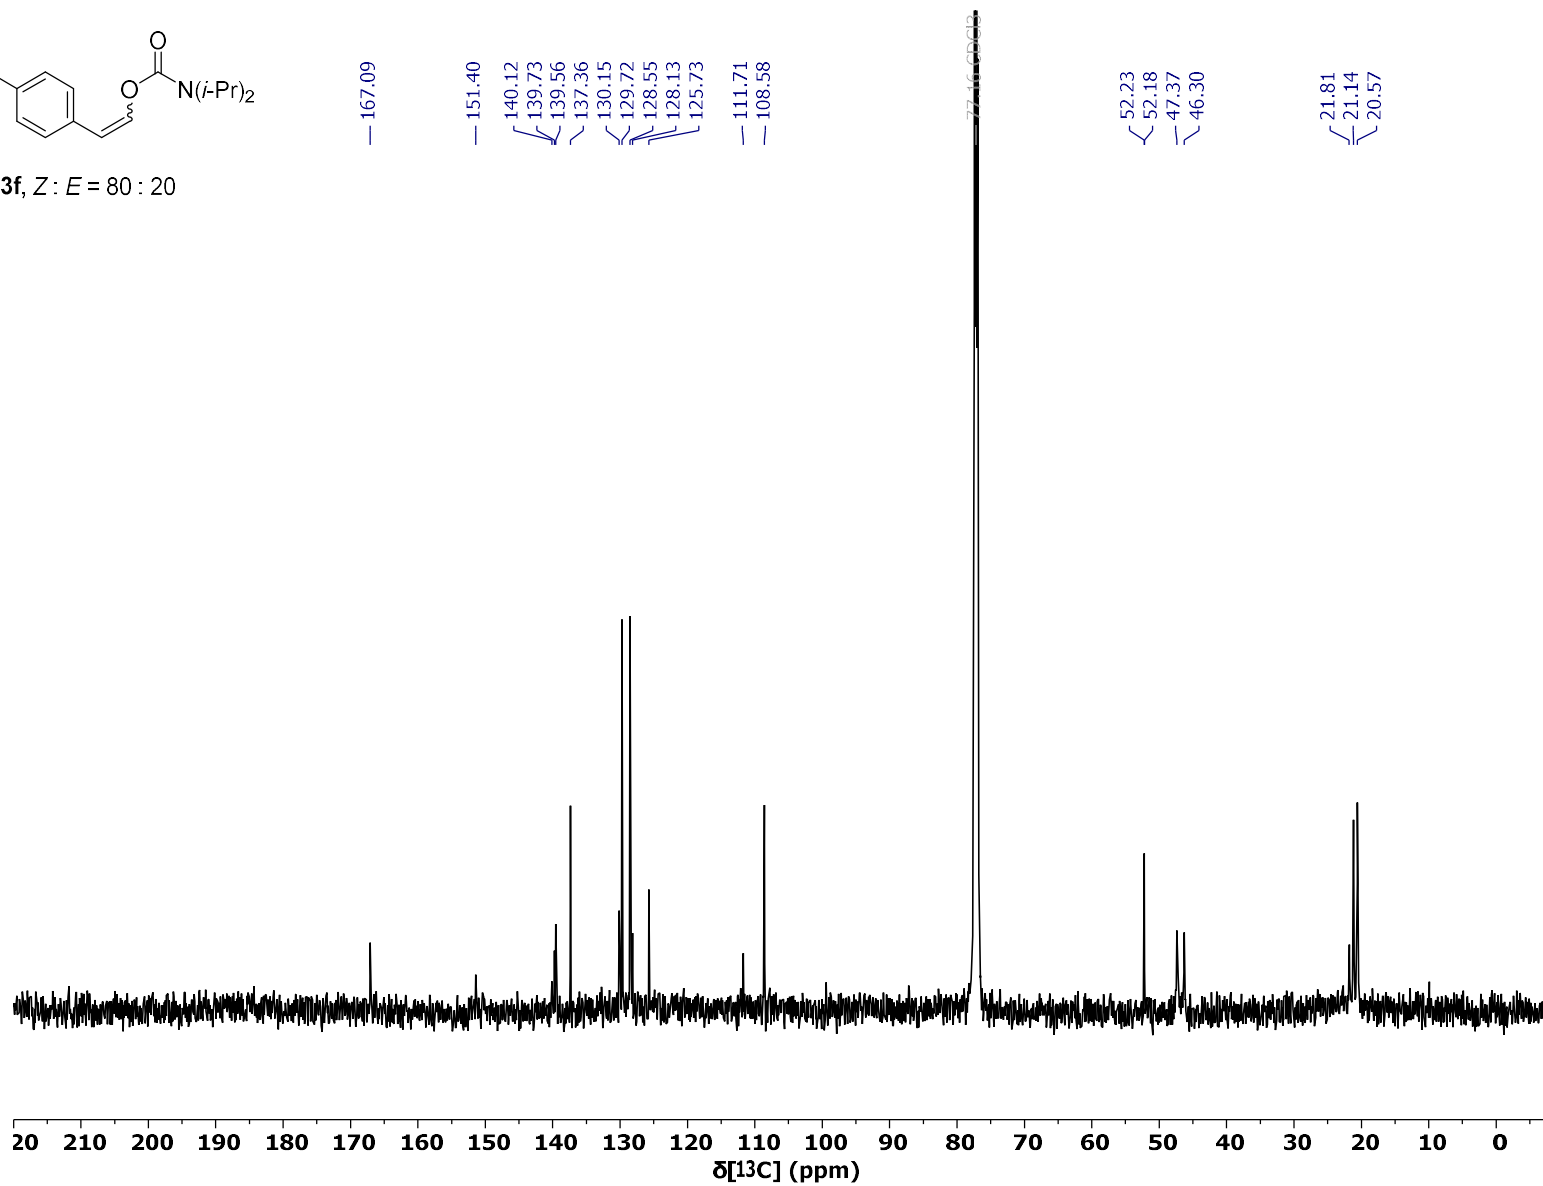

$^1\text{H}$  NMR (400 MHz,  $\text{CDCl}_3$ )

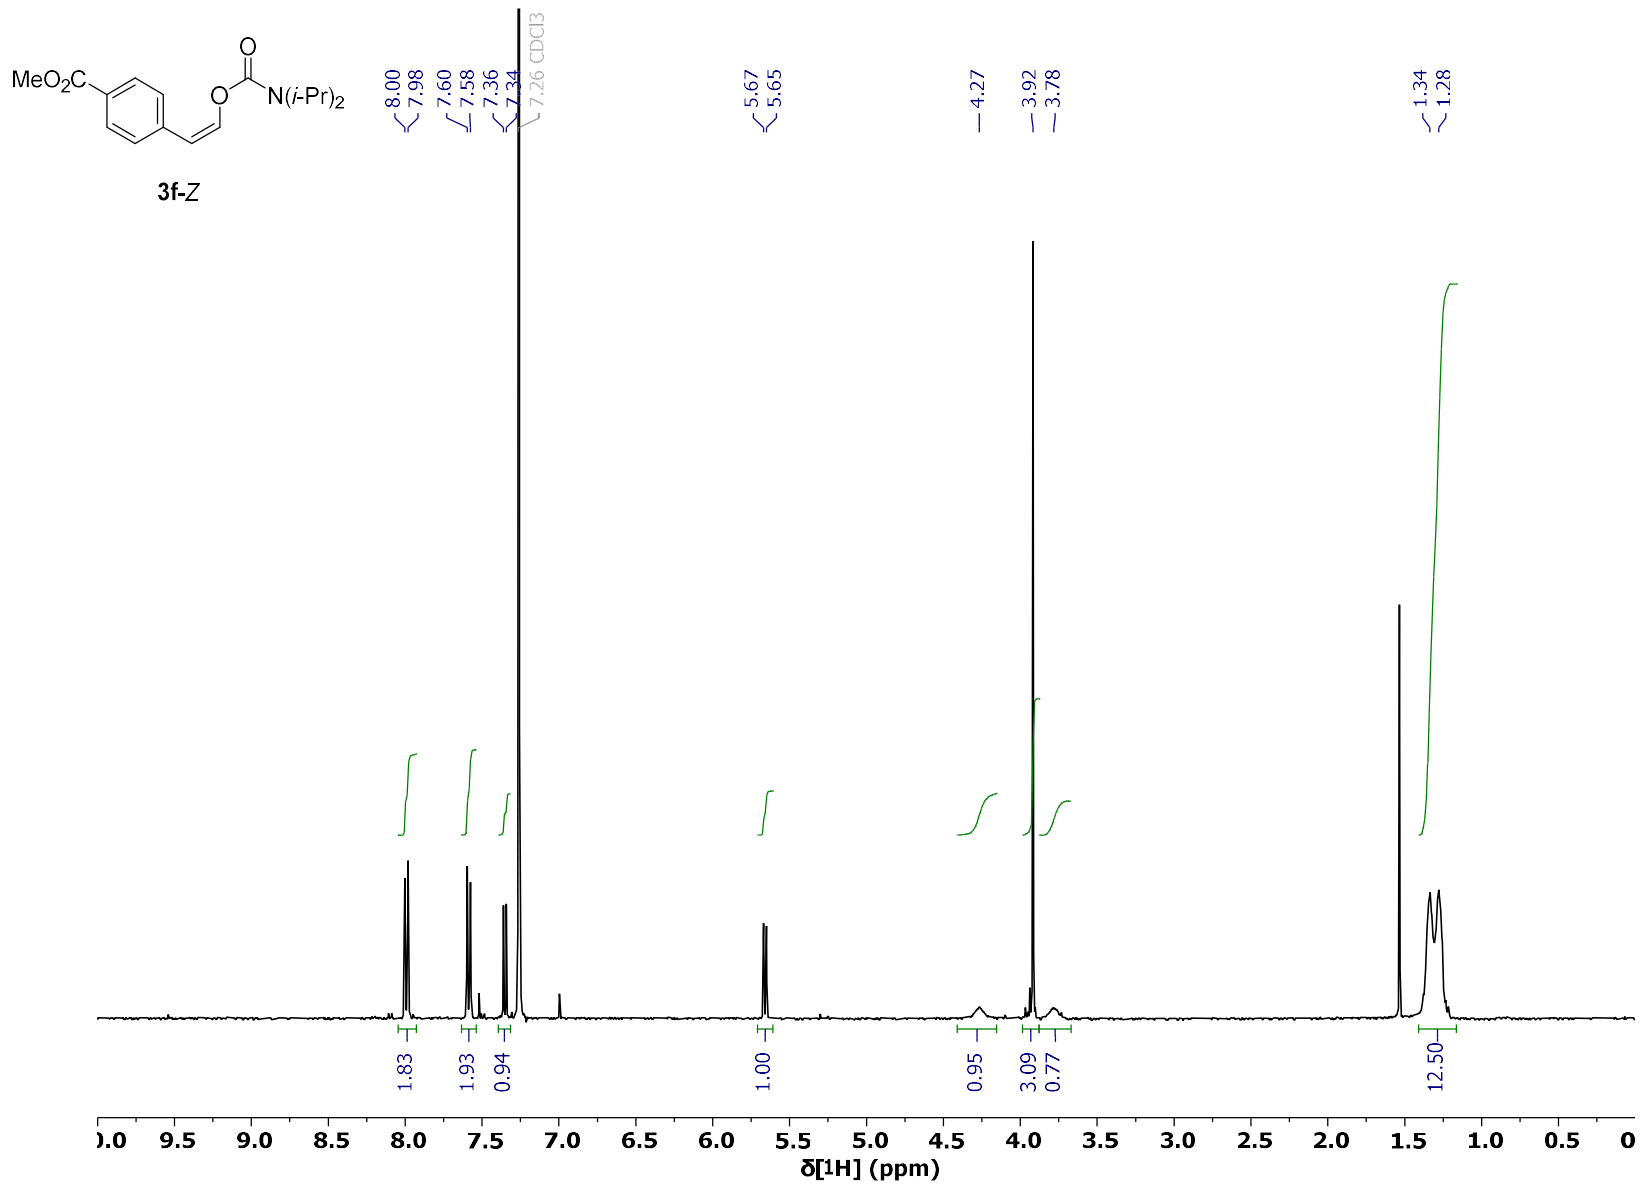

<sup>13</sup>C NMR (151 MHz, CDCl<sub>3</sub>)

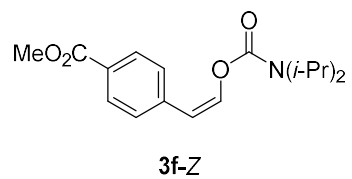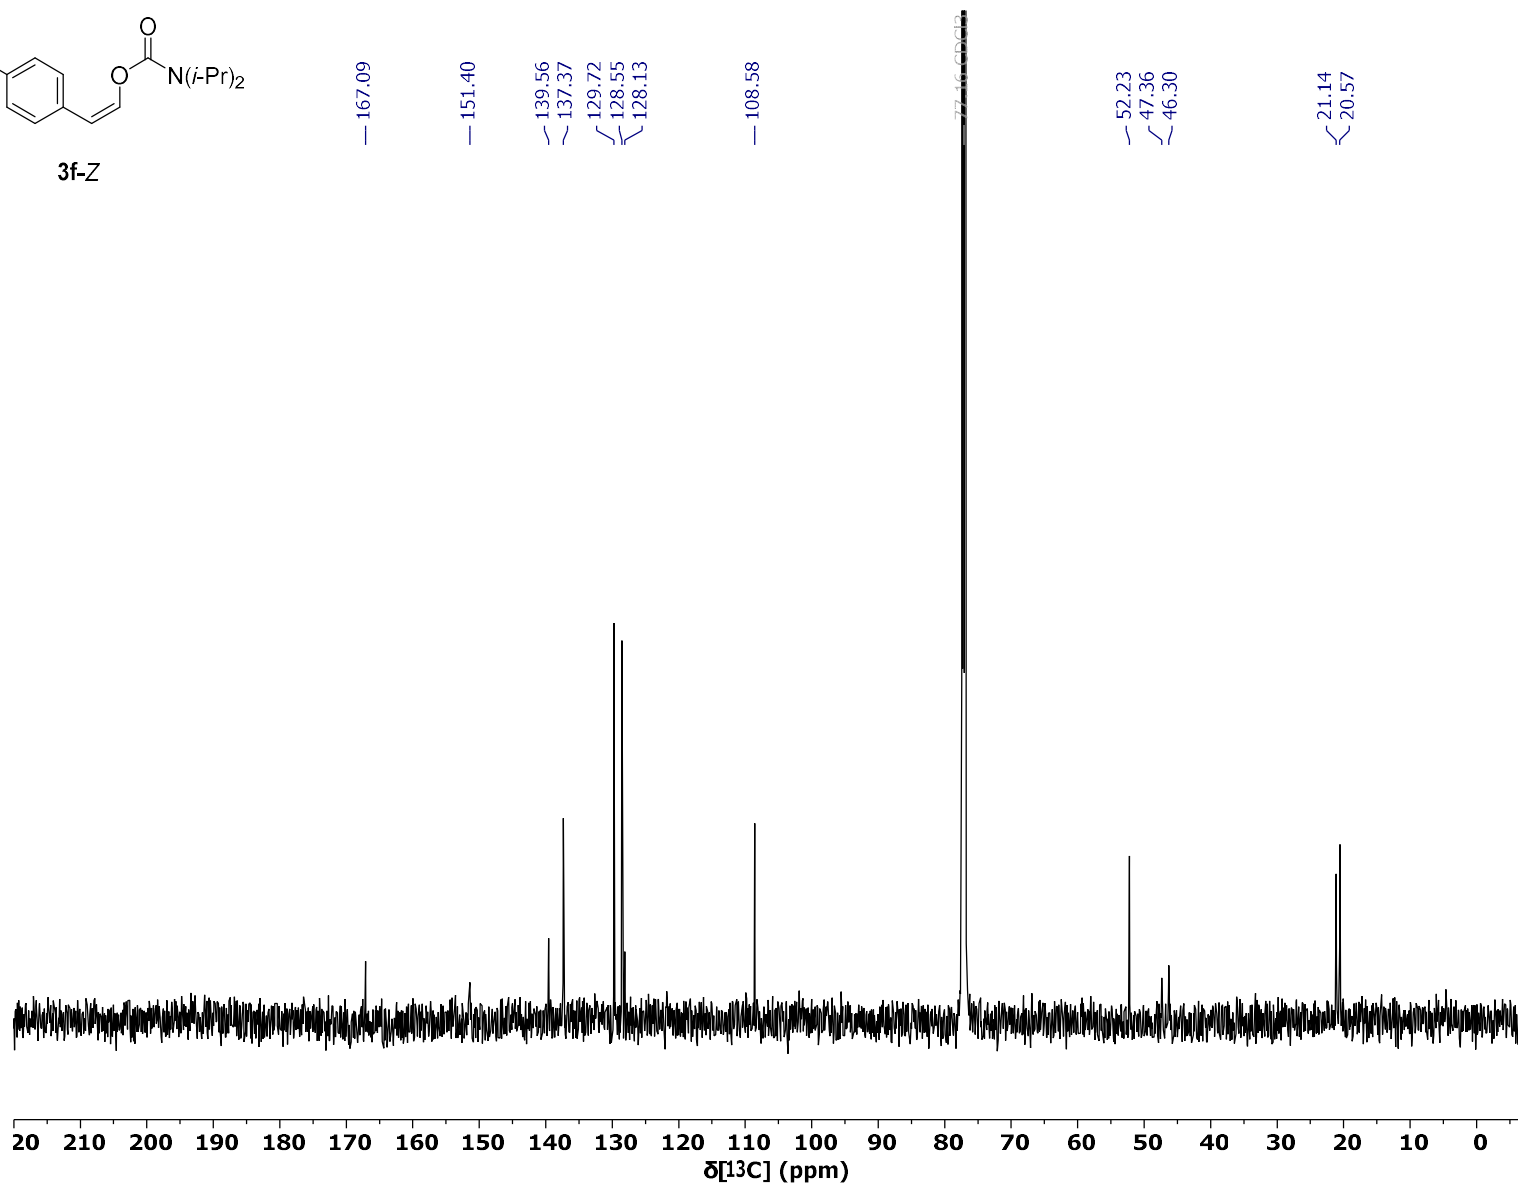



$^1\text{H}$  NMR (600 MHz,  $\text{CDCl}_3$ )

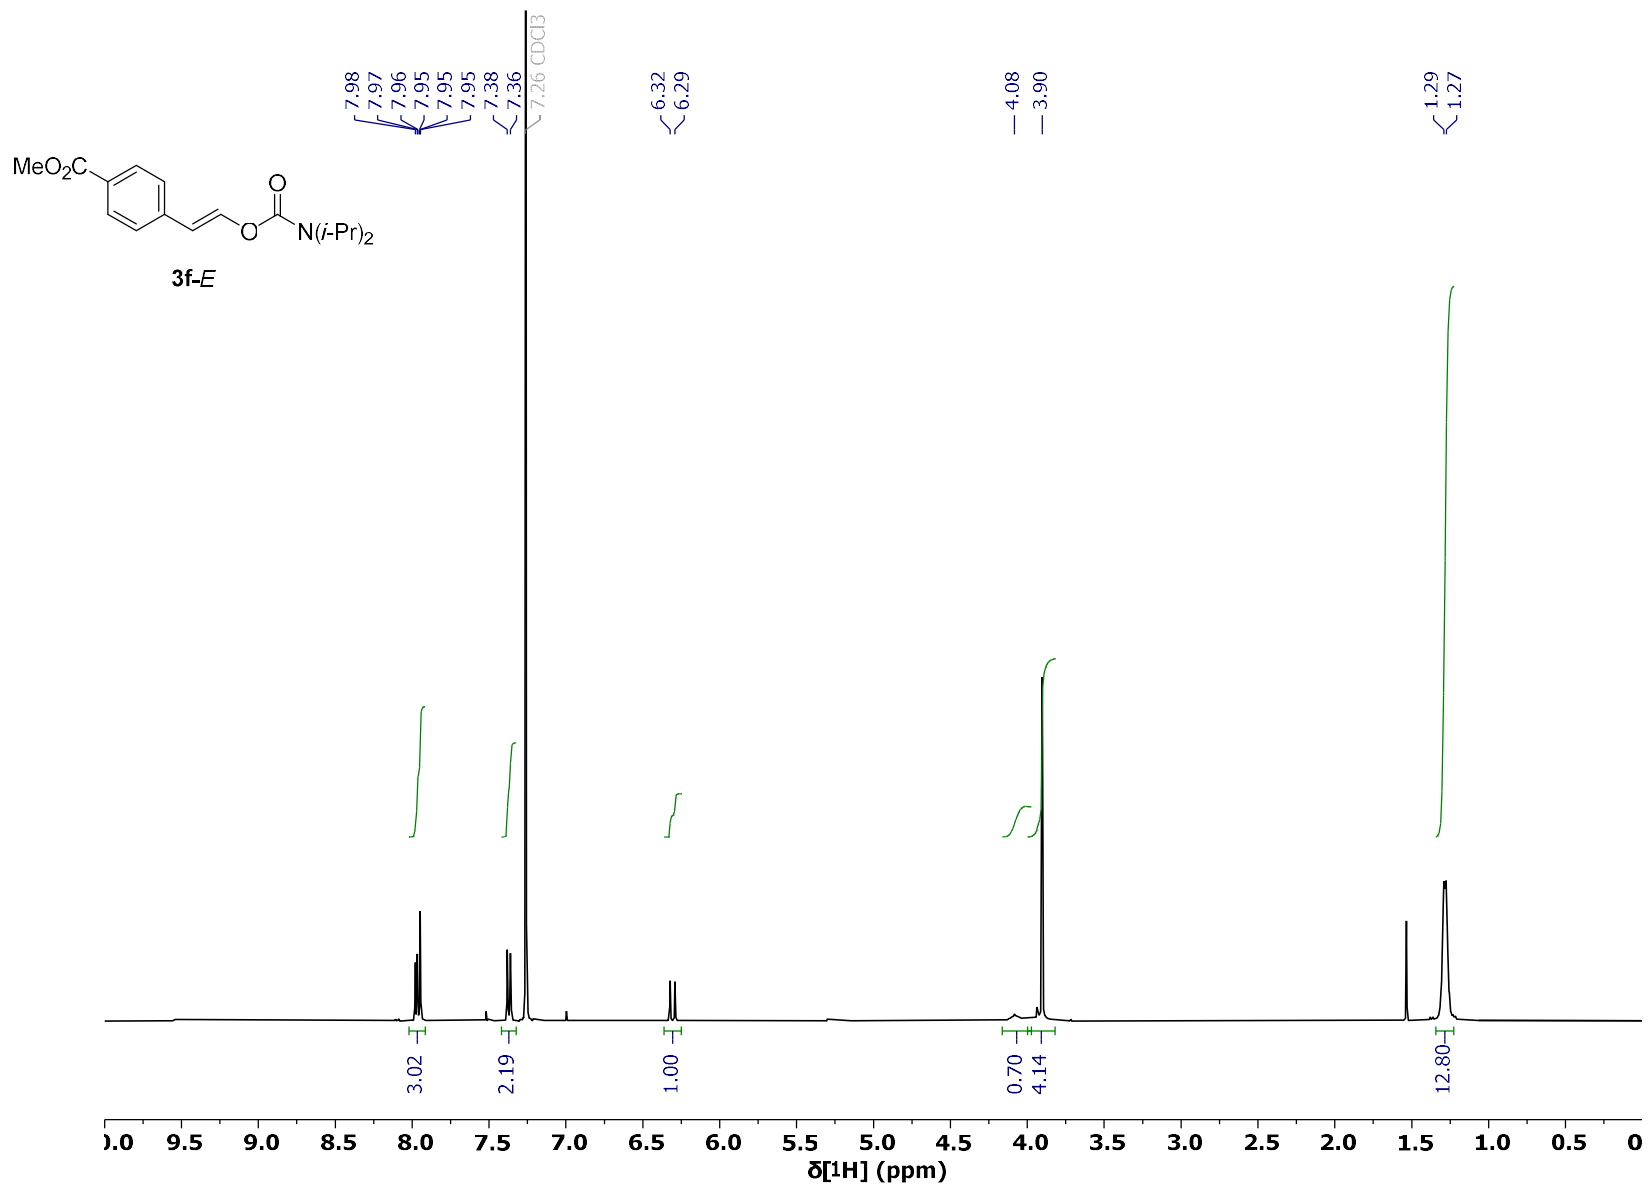

<sup>13</sup>C NMR (151 MHz, CDCl<sub>3</sub>)

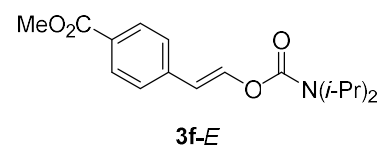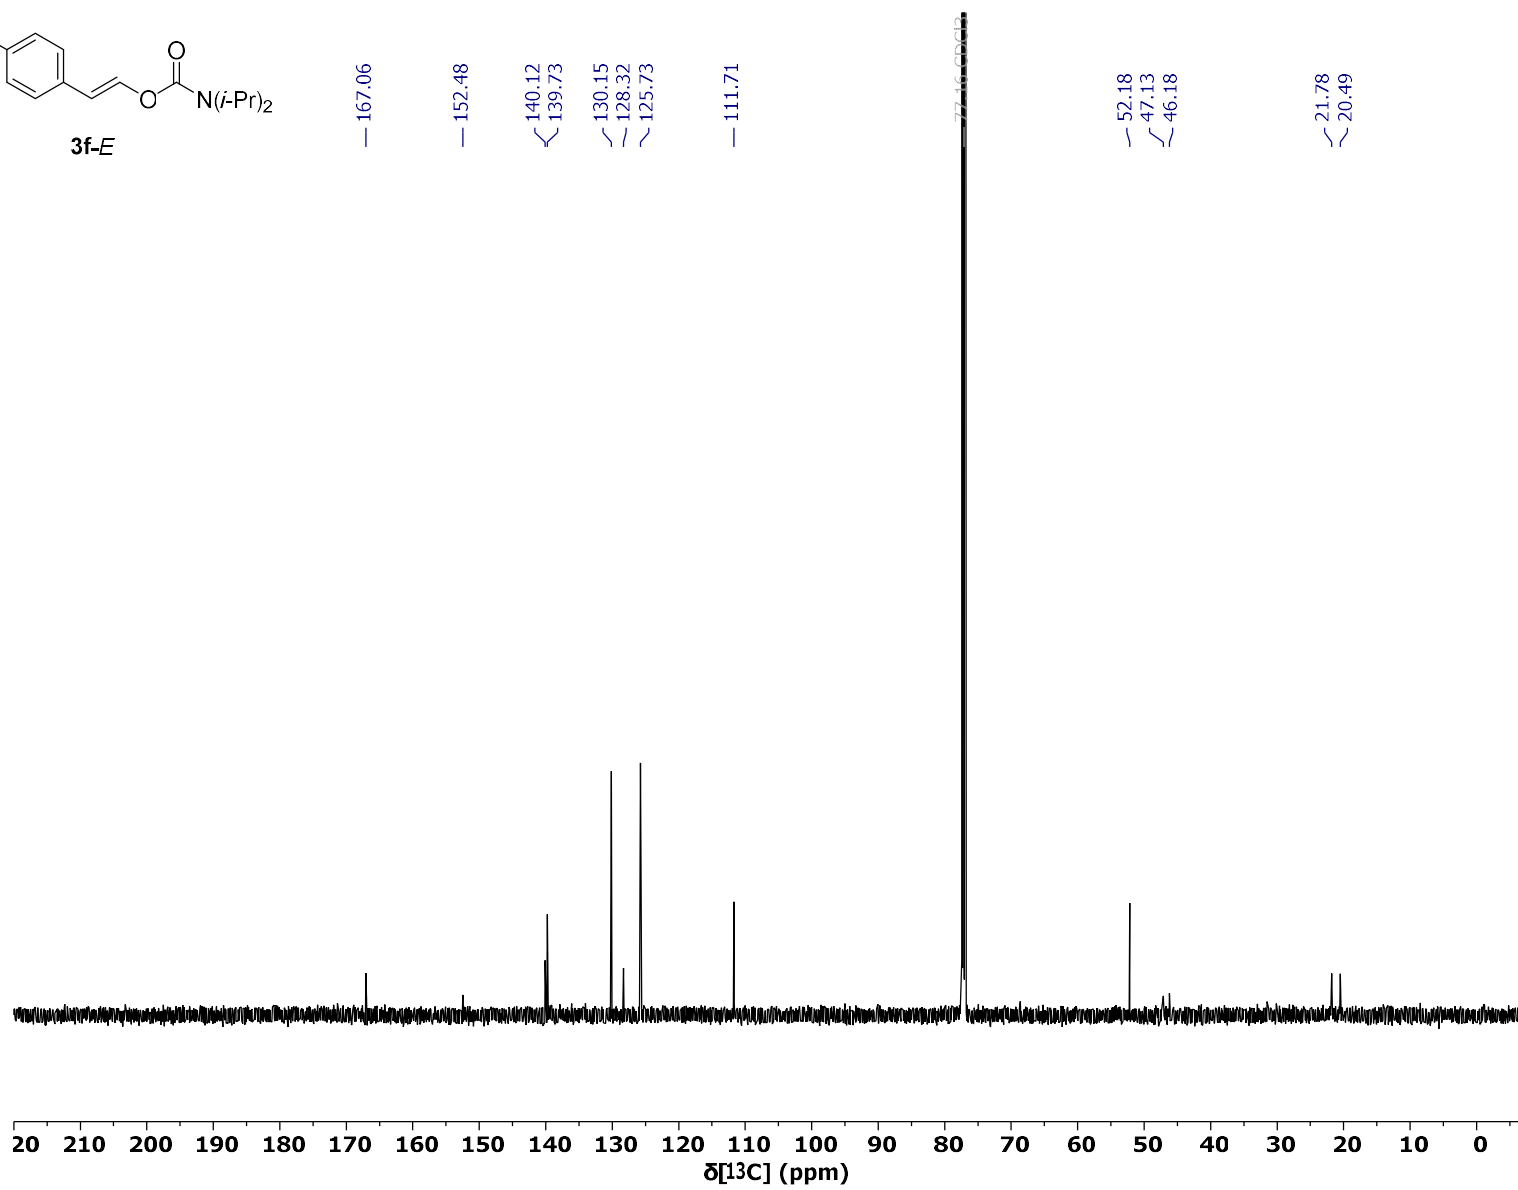

<sup>1</sup>H NMR (400 MHz, CDCl<sub>3</sub>)

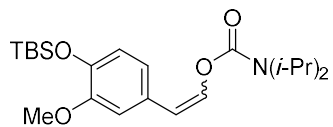

3g, Z : E = 90 : 10

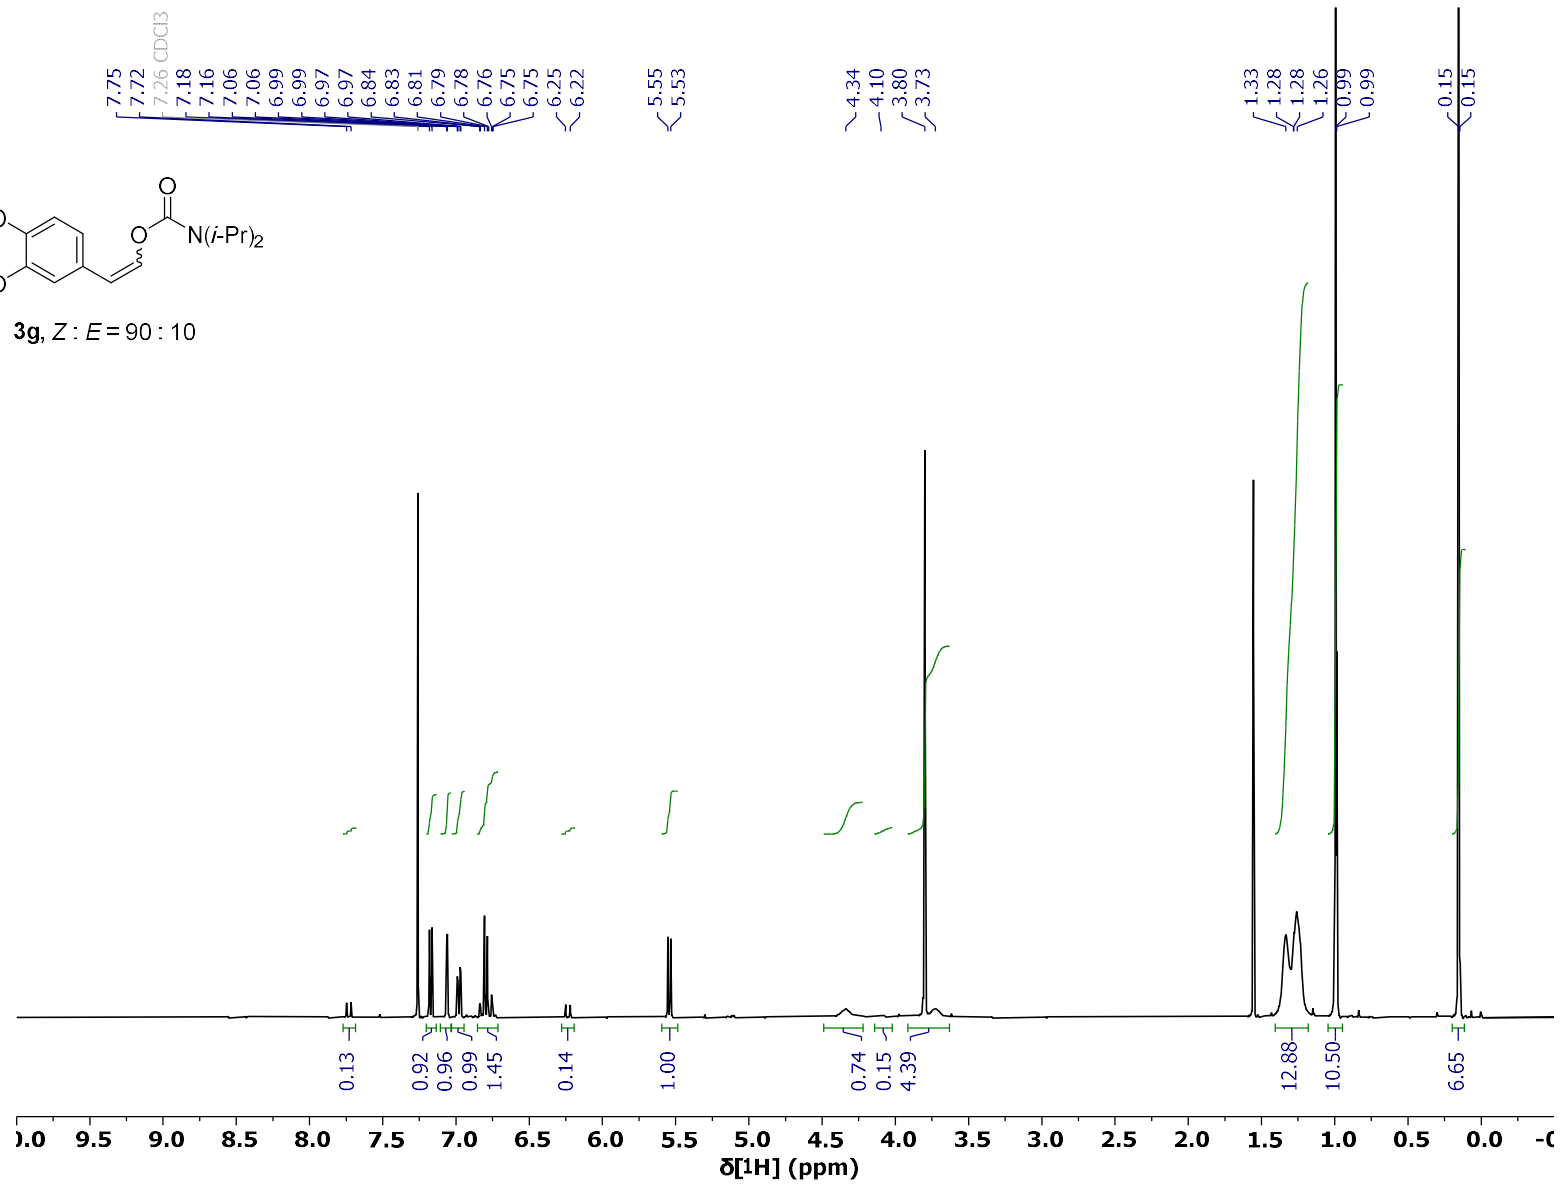

<sup>13</sup>C NMR (101 MHz, CDCl<sub>3</sub>)

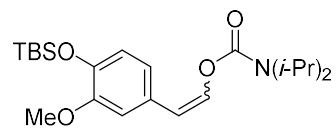

3g, Z : E = 90 : 10

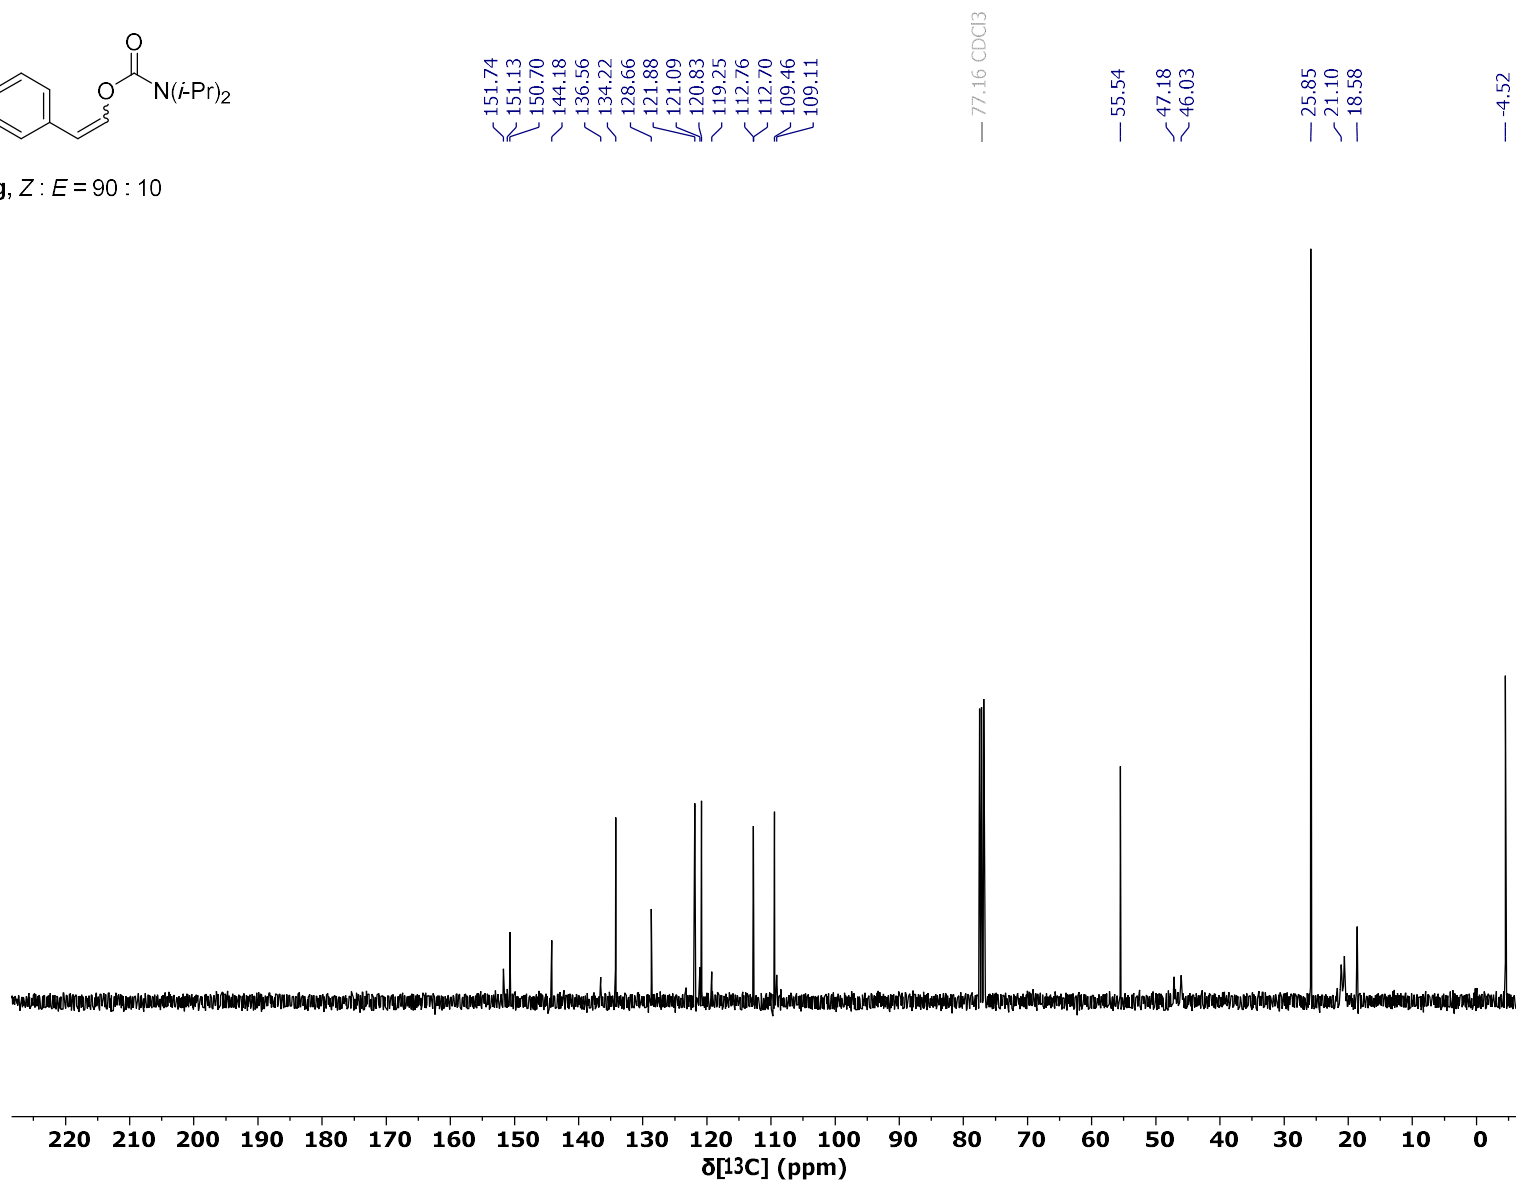

<sup>1</sup>H NMR (400 MHz, CDCl<sub>3</sub>)

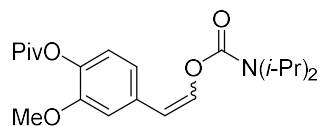

3h, Z : E = 65 : 35

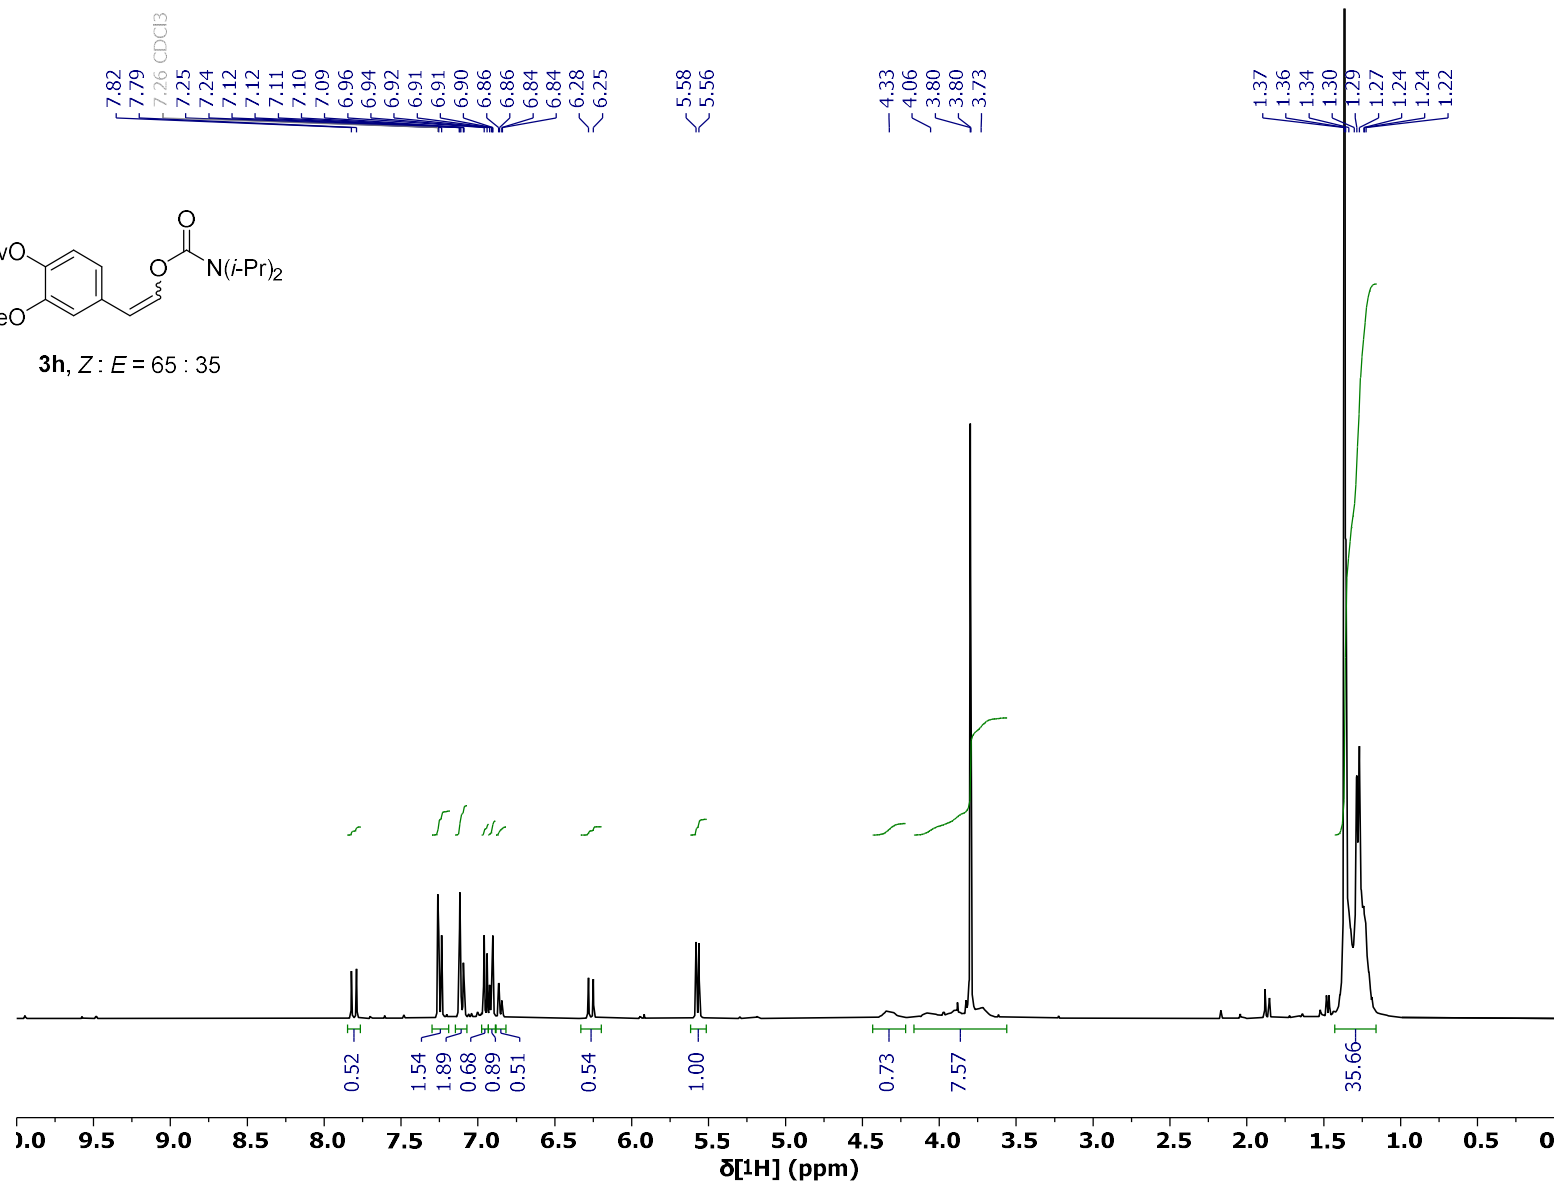

S93

$^{13}\text{C}$  NMR (151 MHz,  $\text{CDCl}_3$ )

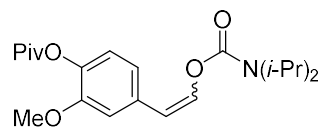

**3h**, Z : E = 65 : 35

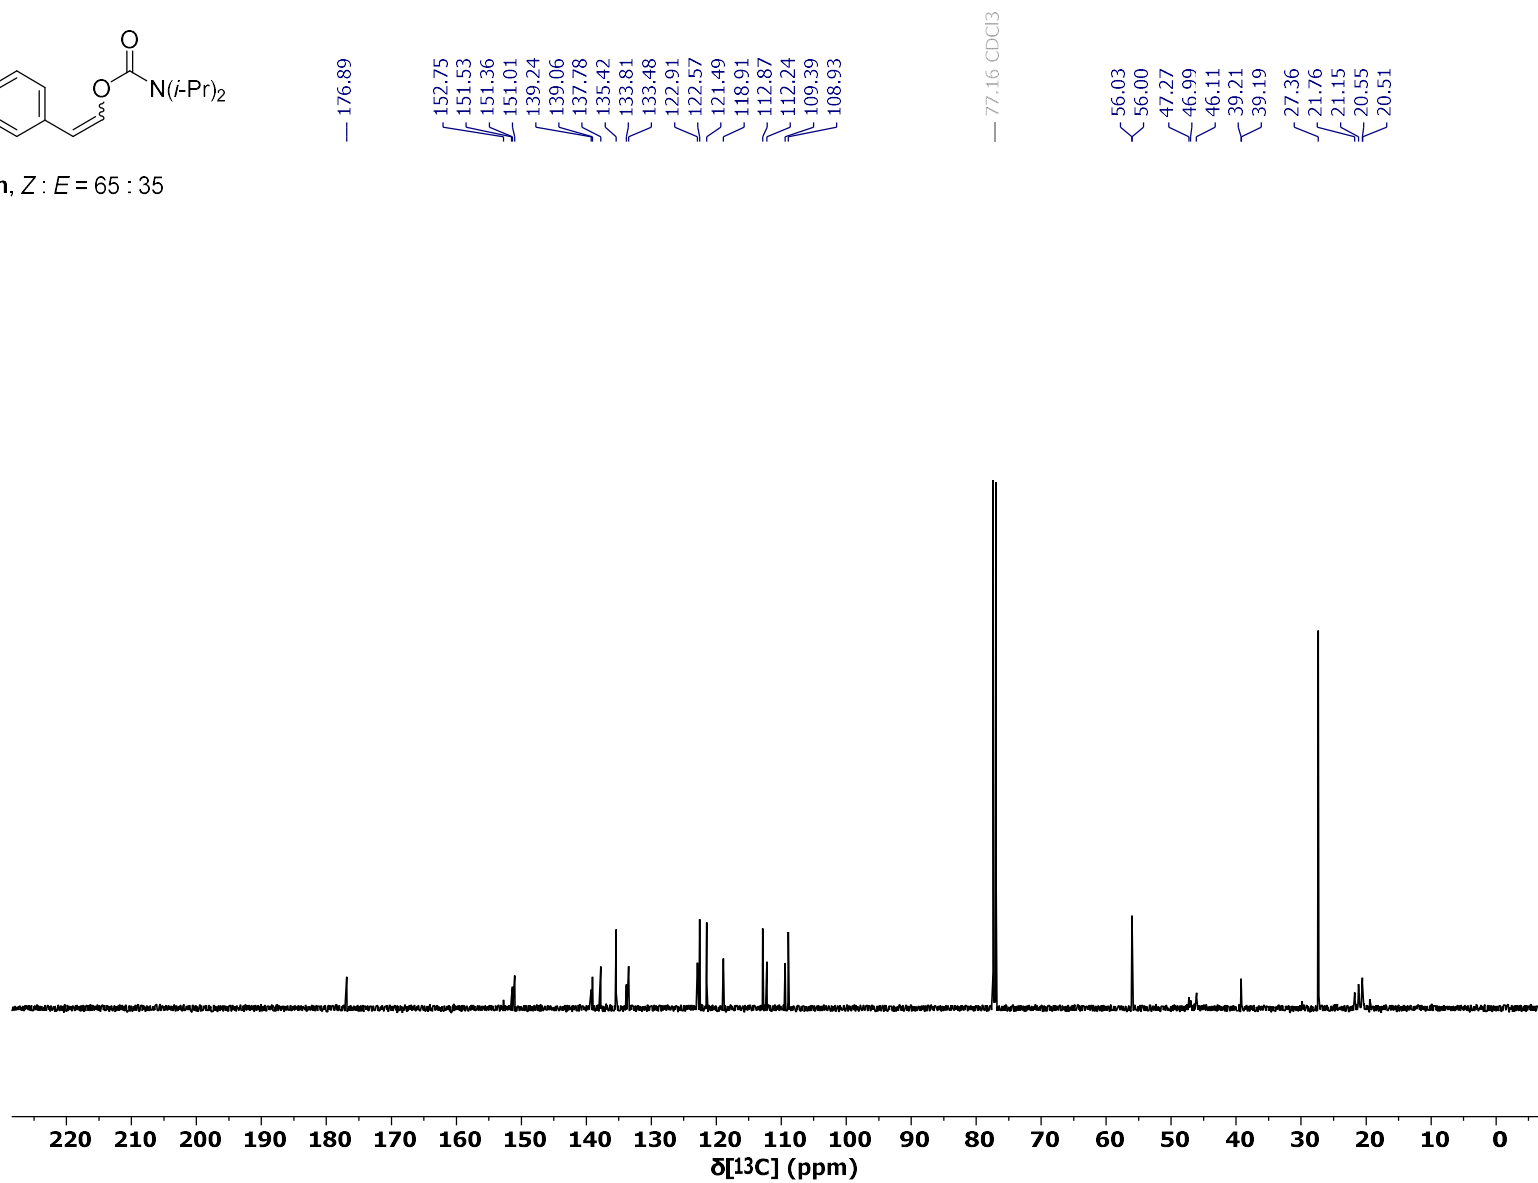

<sup>1</sup>H NMR (400 MHz, CDCl<sub>3</sub>)

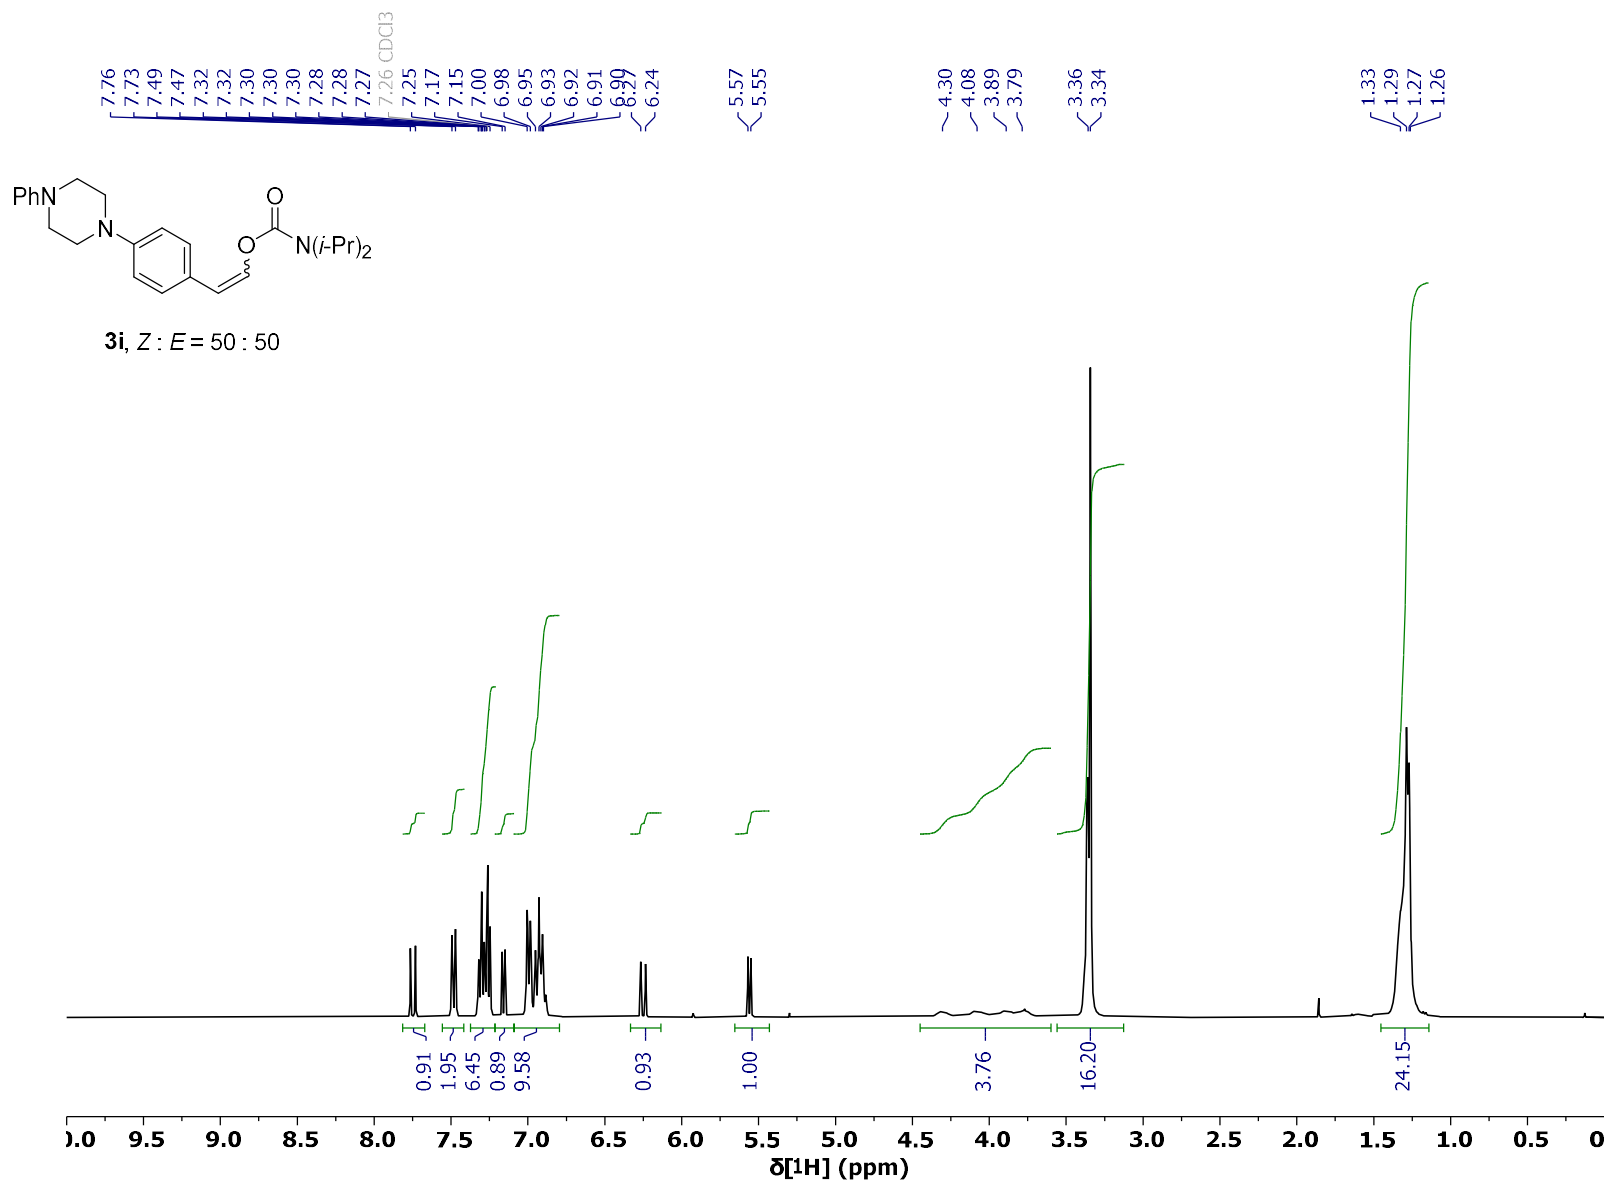

<sup>13</sup>C NMR (151 MHz, CDCl<sub>3</sub>)

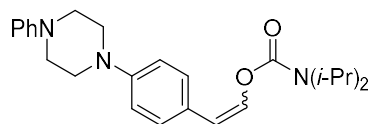

3i, Z : E = 50 : 50

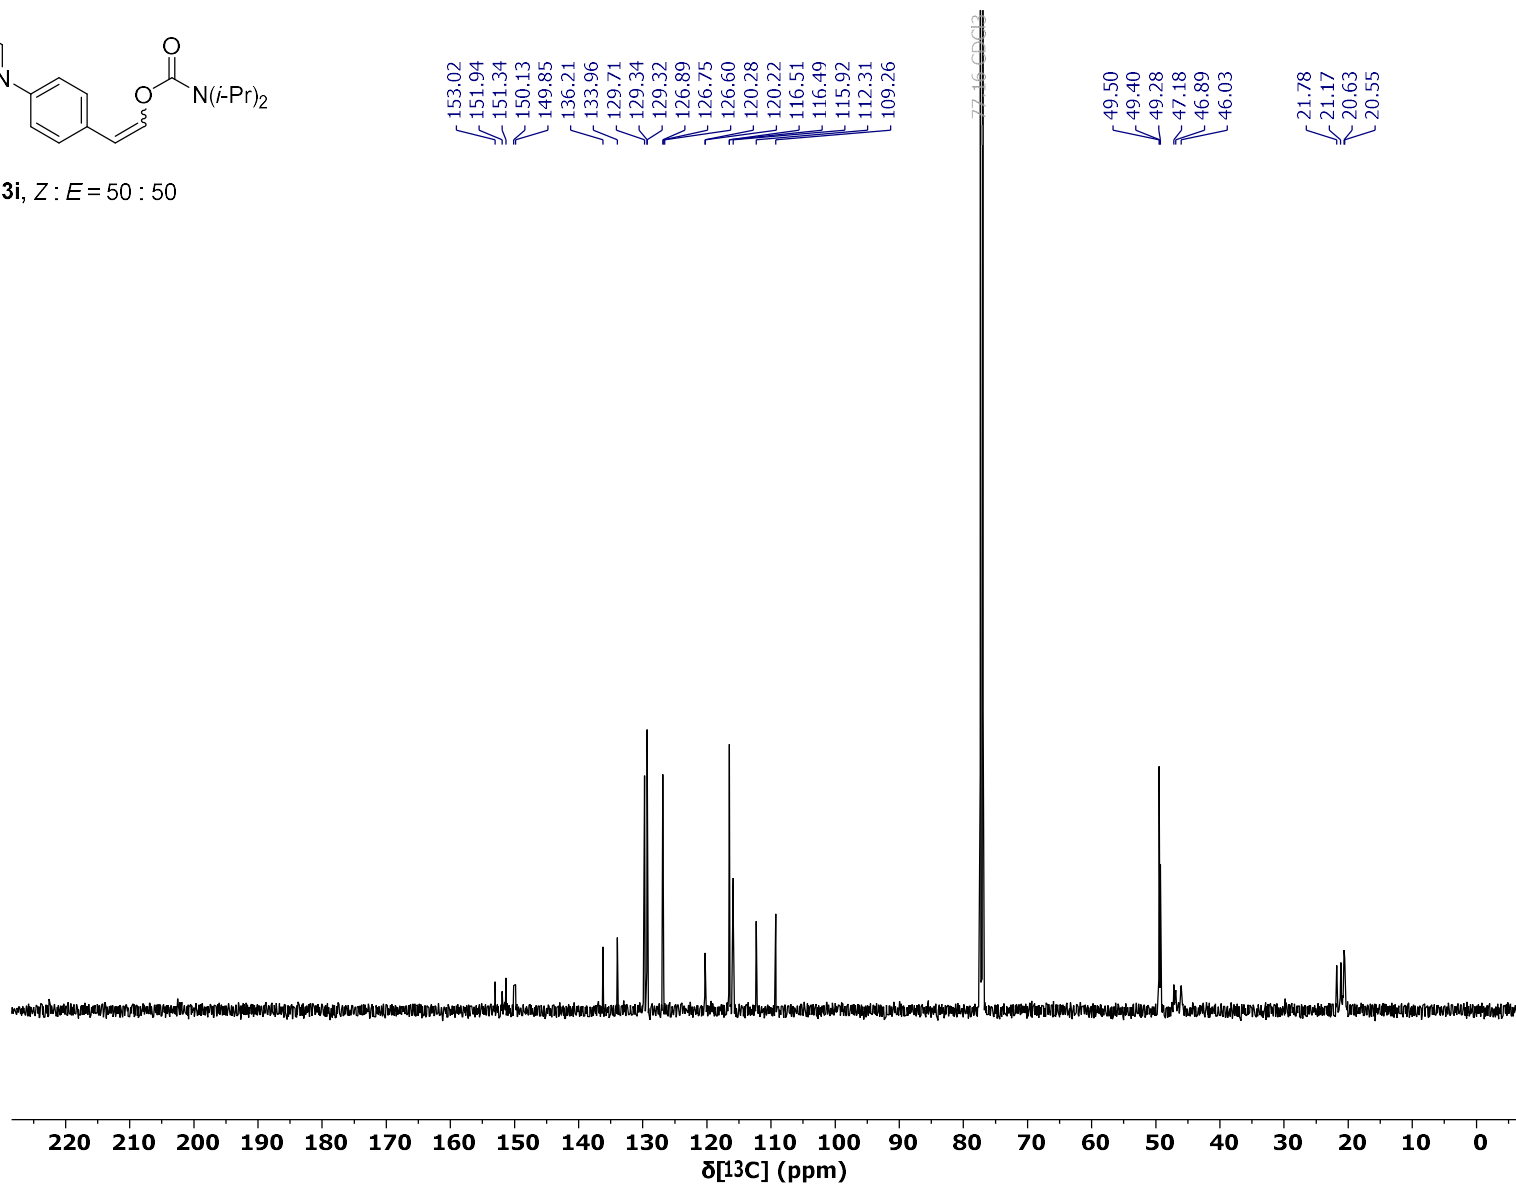



<sup>1</sup>H NMR (400 MHz, CDCl<sub>3</sub>)

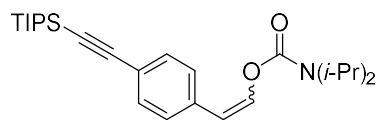

3j, Z : E = 80 : 20

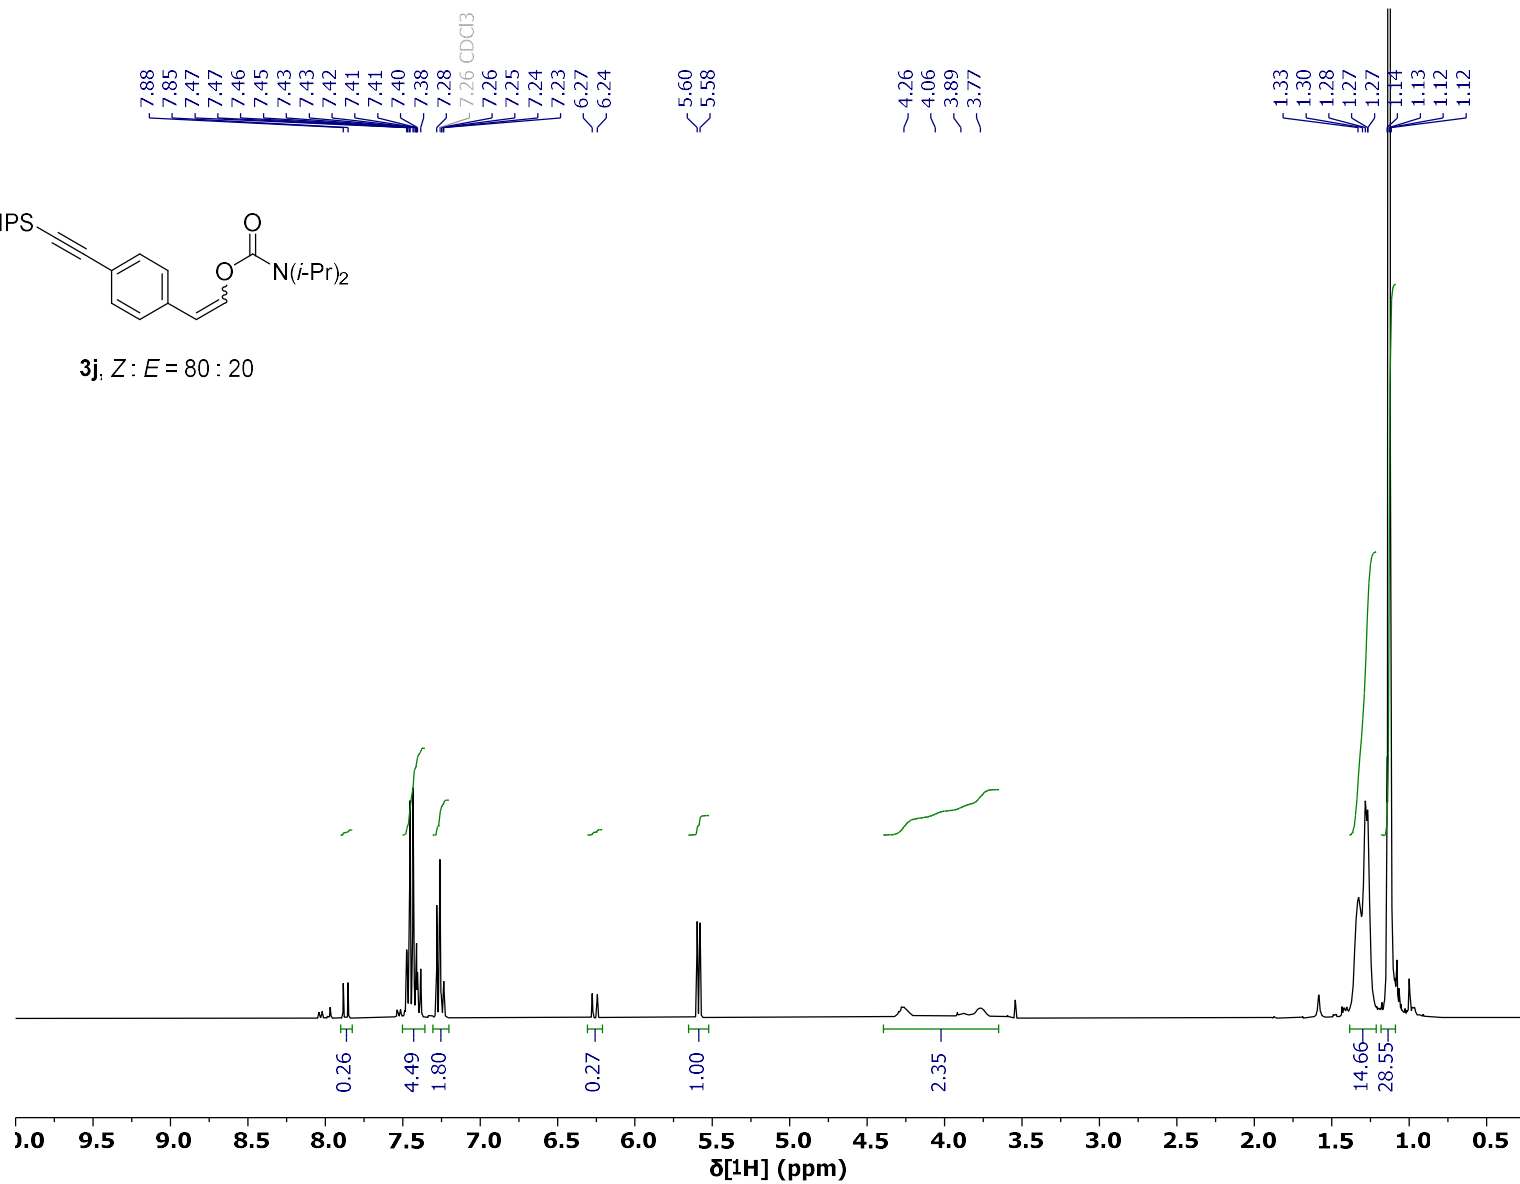

$^{13}\text{C}$  NMR (151 MHz,  $\text{CDCl}_3$ )

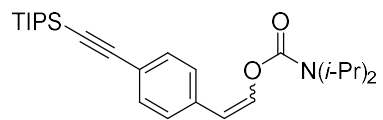

**3j**, Z : E = 80 : 20

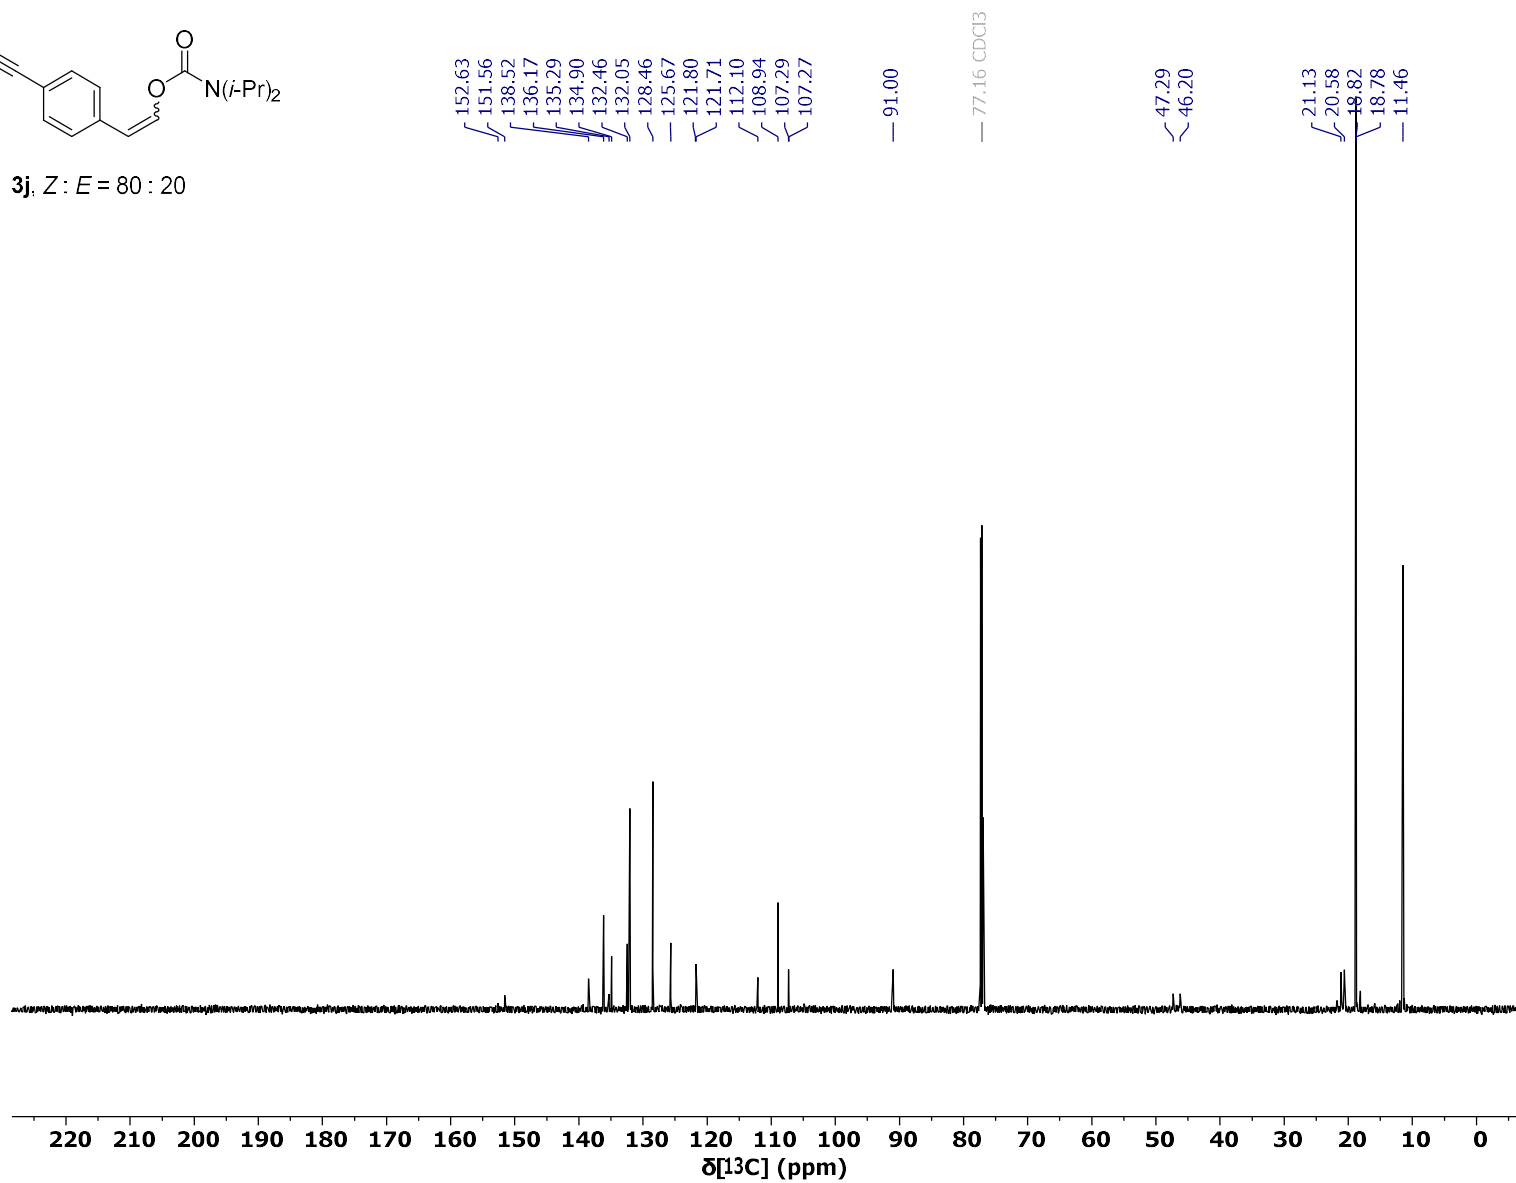

<sup>1</sup>H NMR (400 MHz, CDCl<sub>3</sub>)

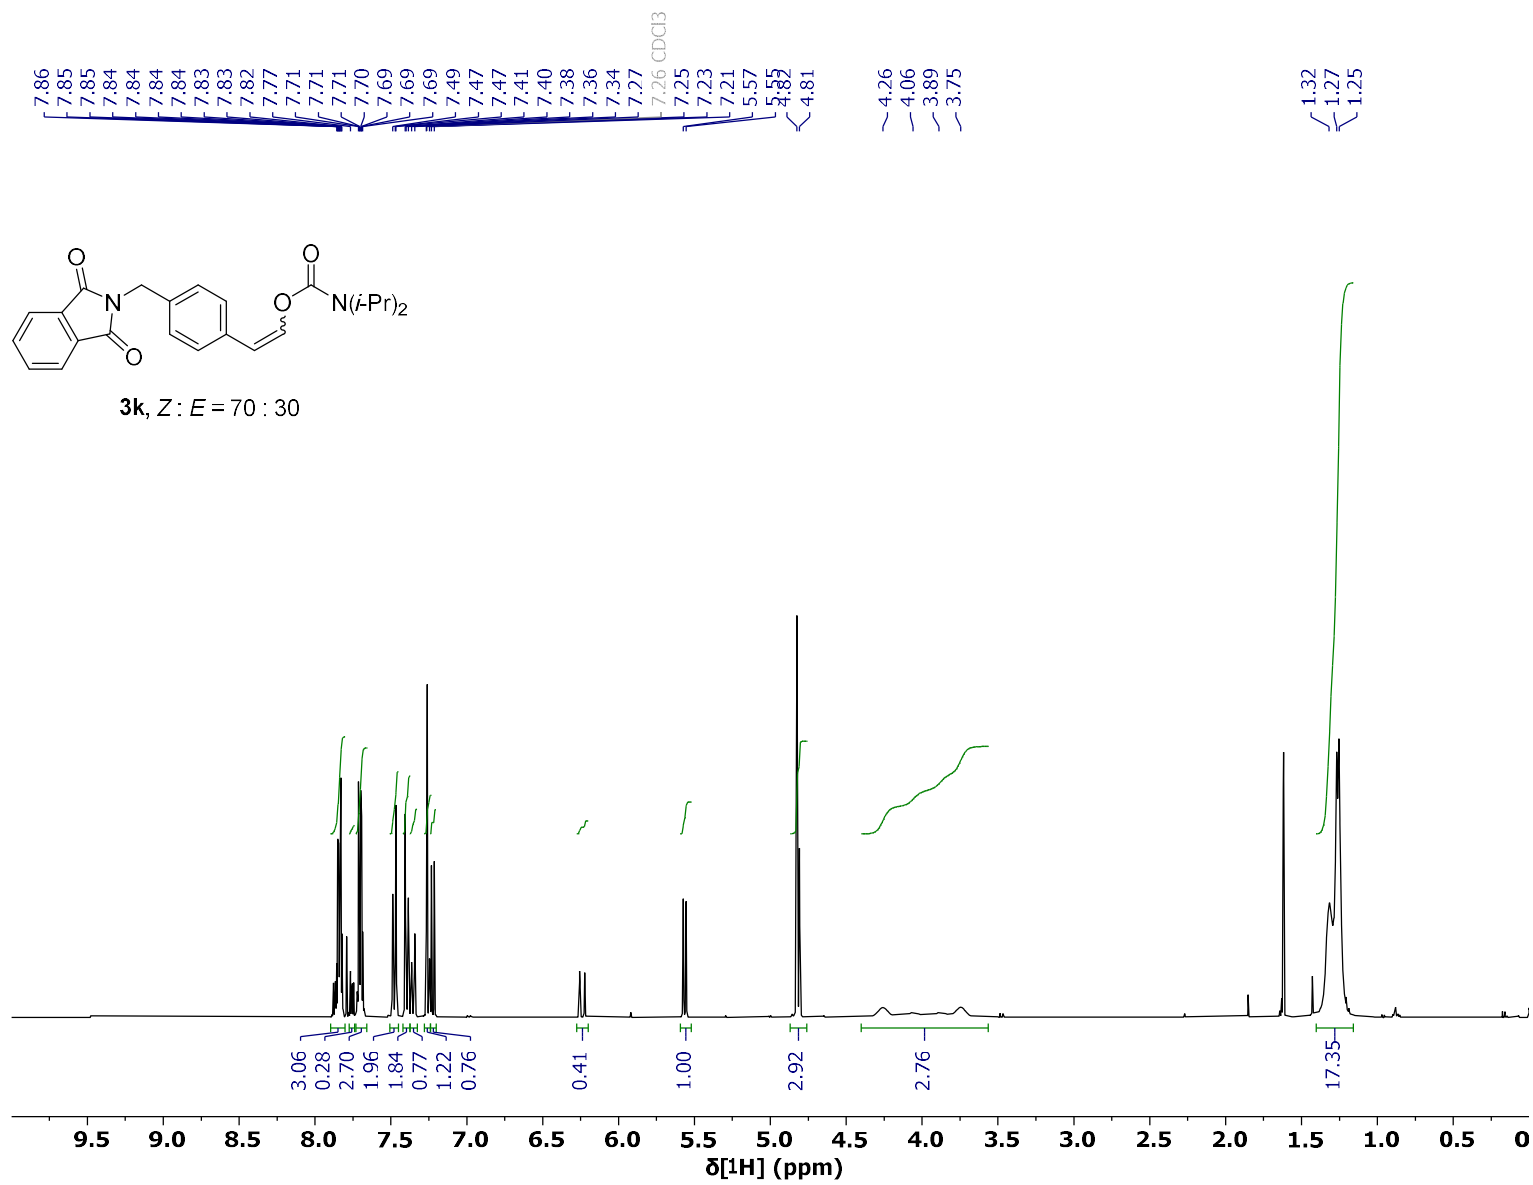

S99

<sup>13</sup>C NMR (151 MHz, CDCl<sub>3</sub>)

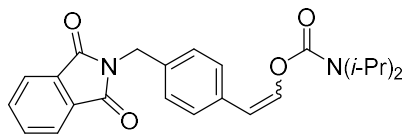

**3k**, Z : E = 70 : 30

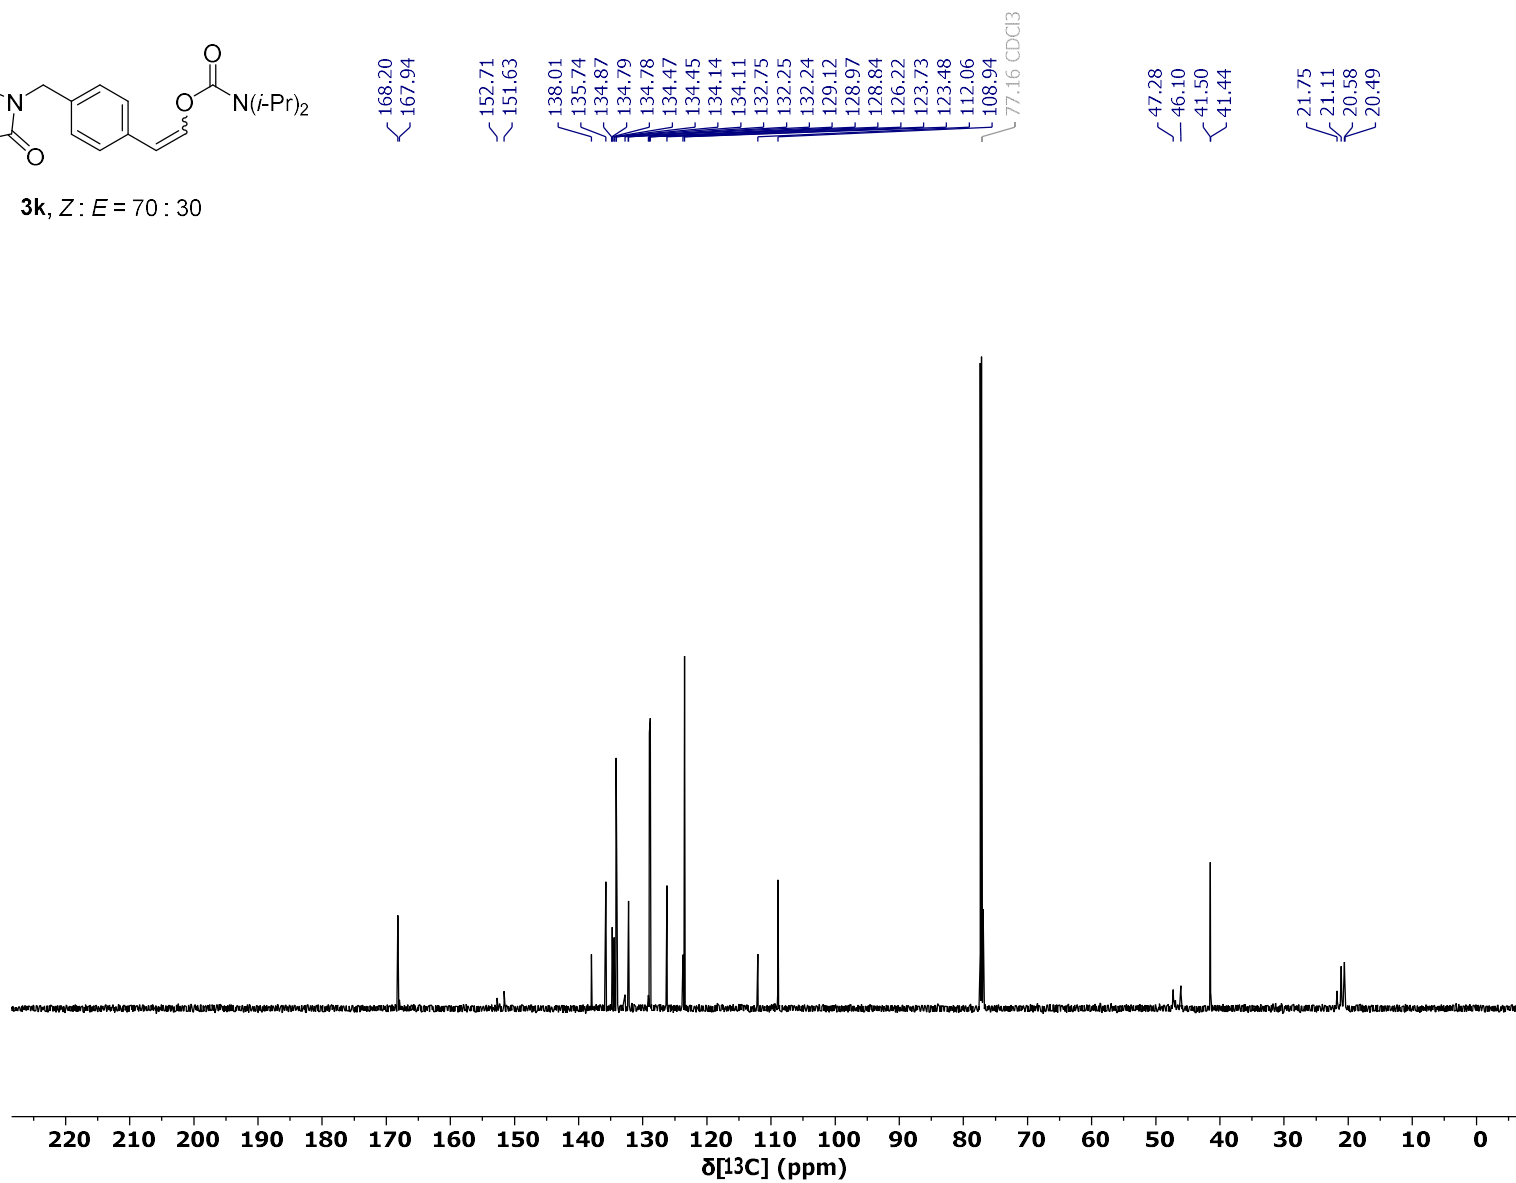

S100

<sup>1</sup>H NMR (400 MHz, CDCl<sub>3</sub>)

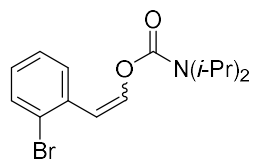

**3**, Z : E = 55 : 45

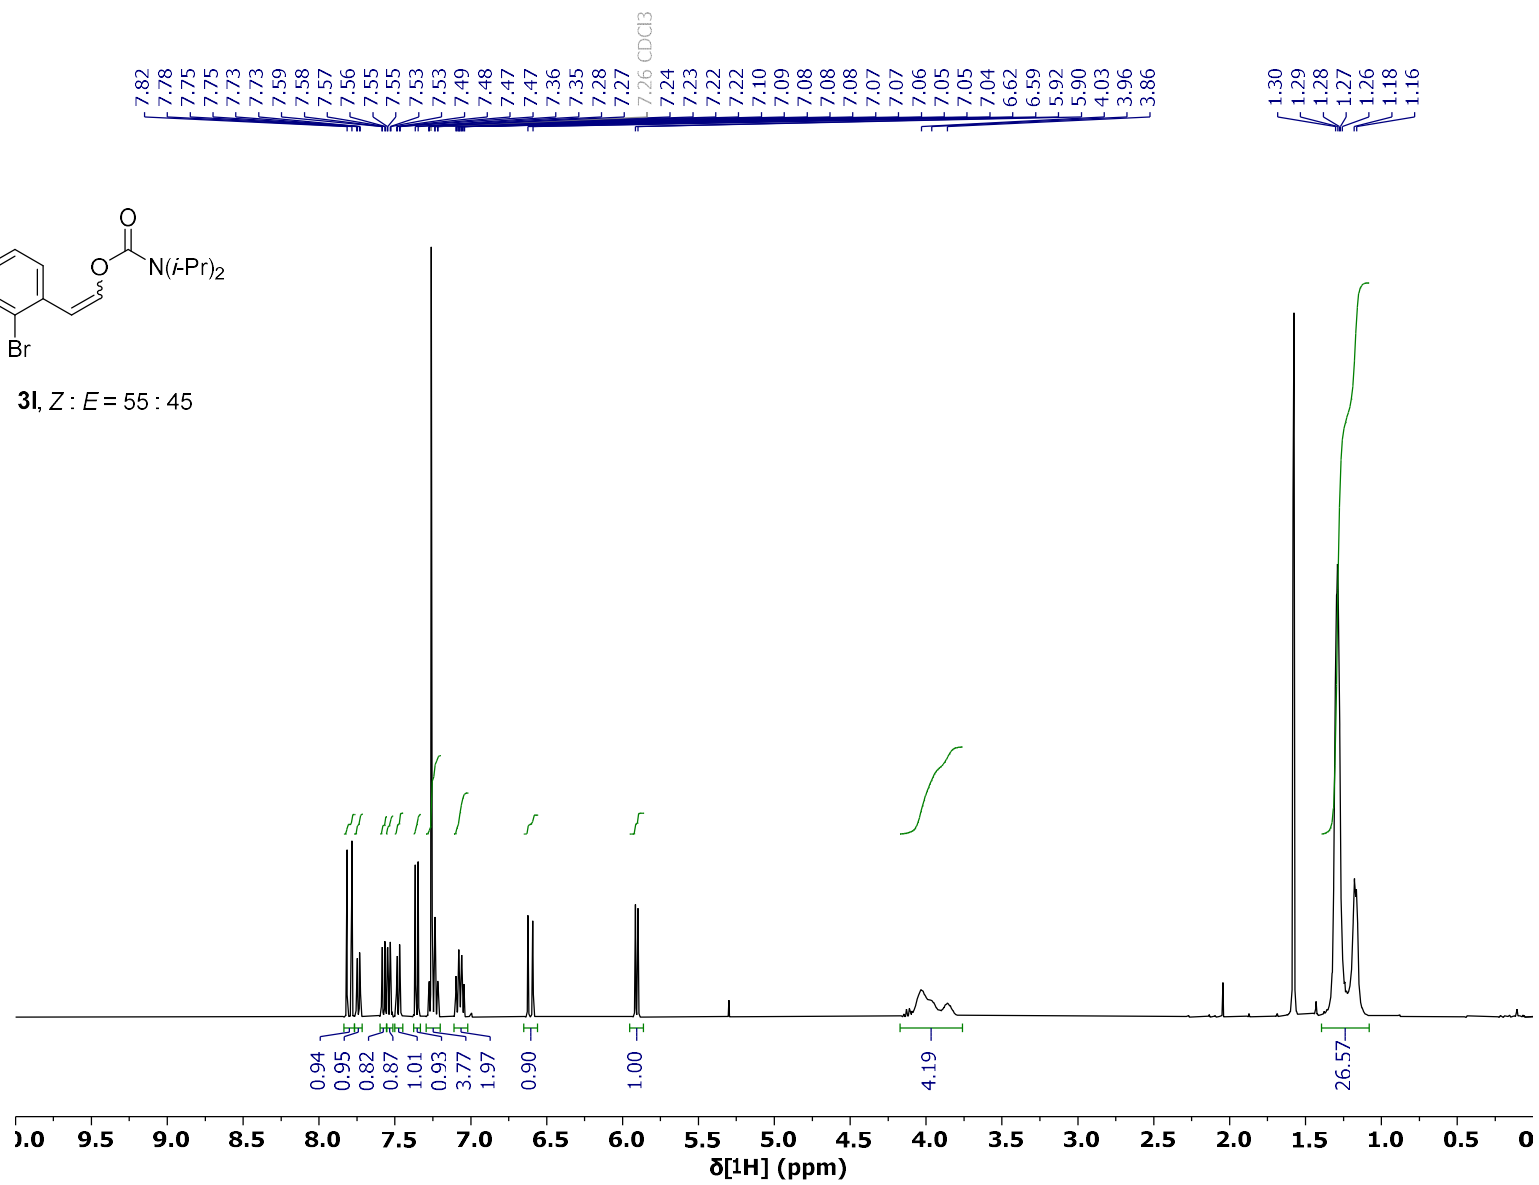

S101

<sup>13</sup>C NMR (151 MHz, CDCl<sub>3</sub>)

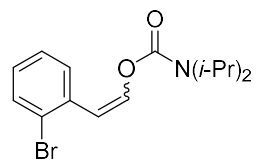

31, Z : E = 55 : 45

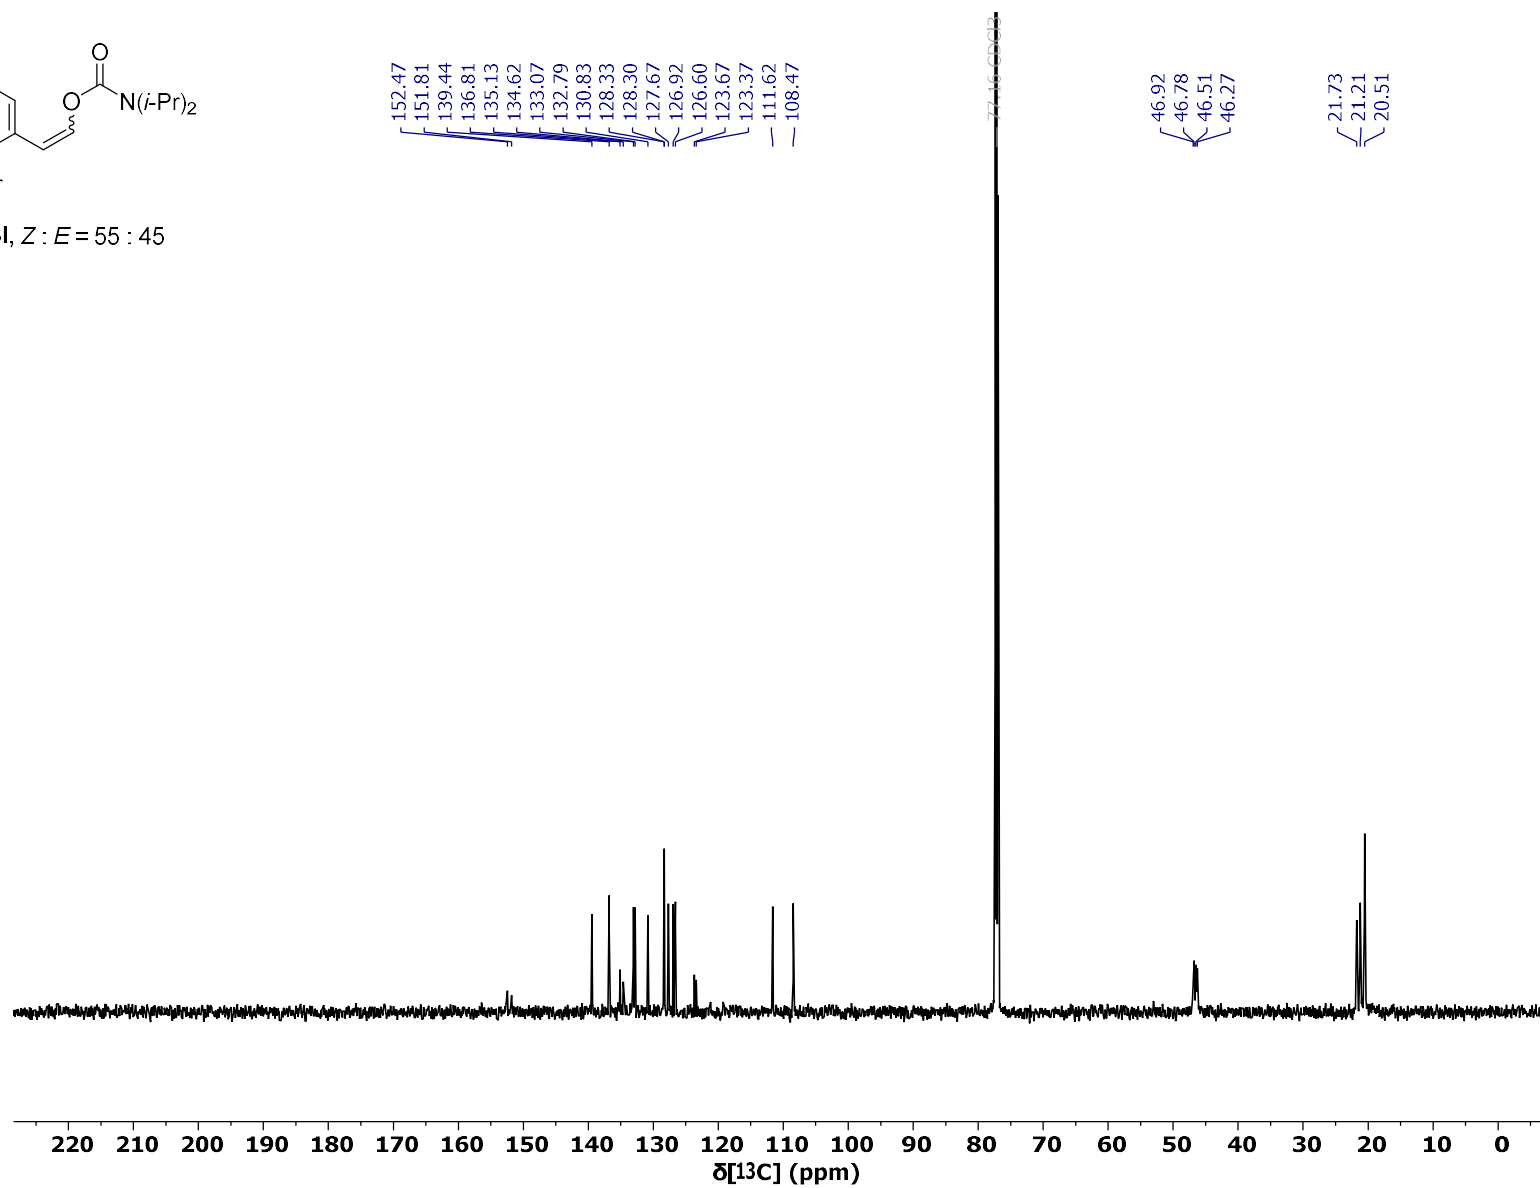

S102

<sup>1</sup>H NMR (400 MHz, CDCl<sub>3</sub>)

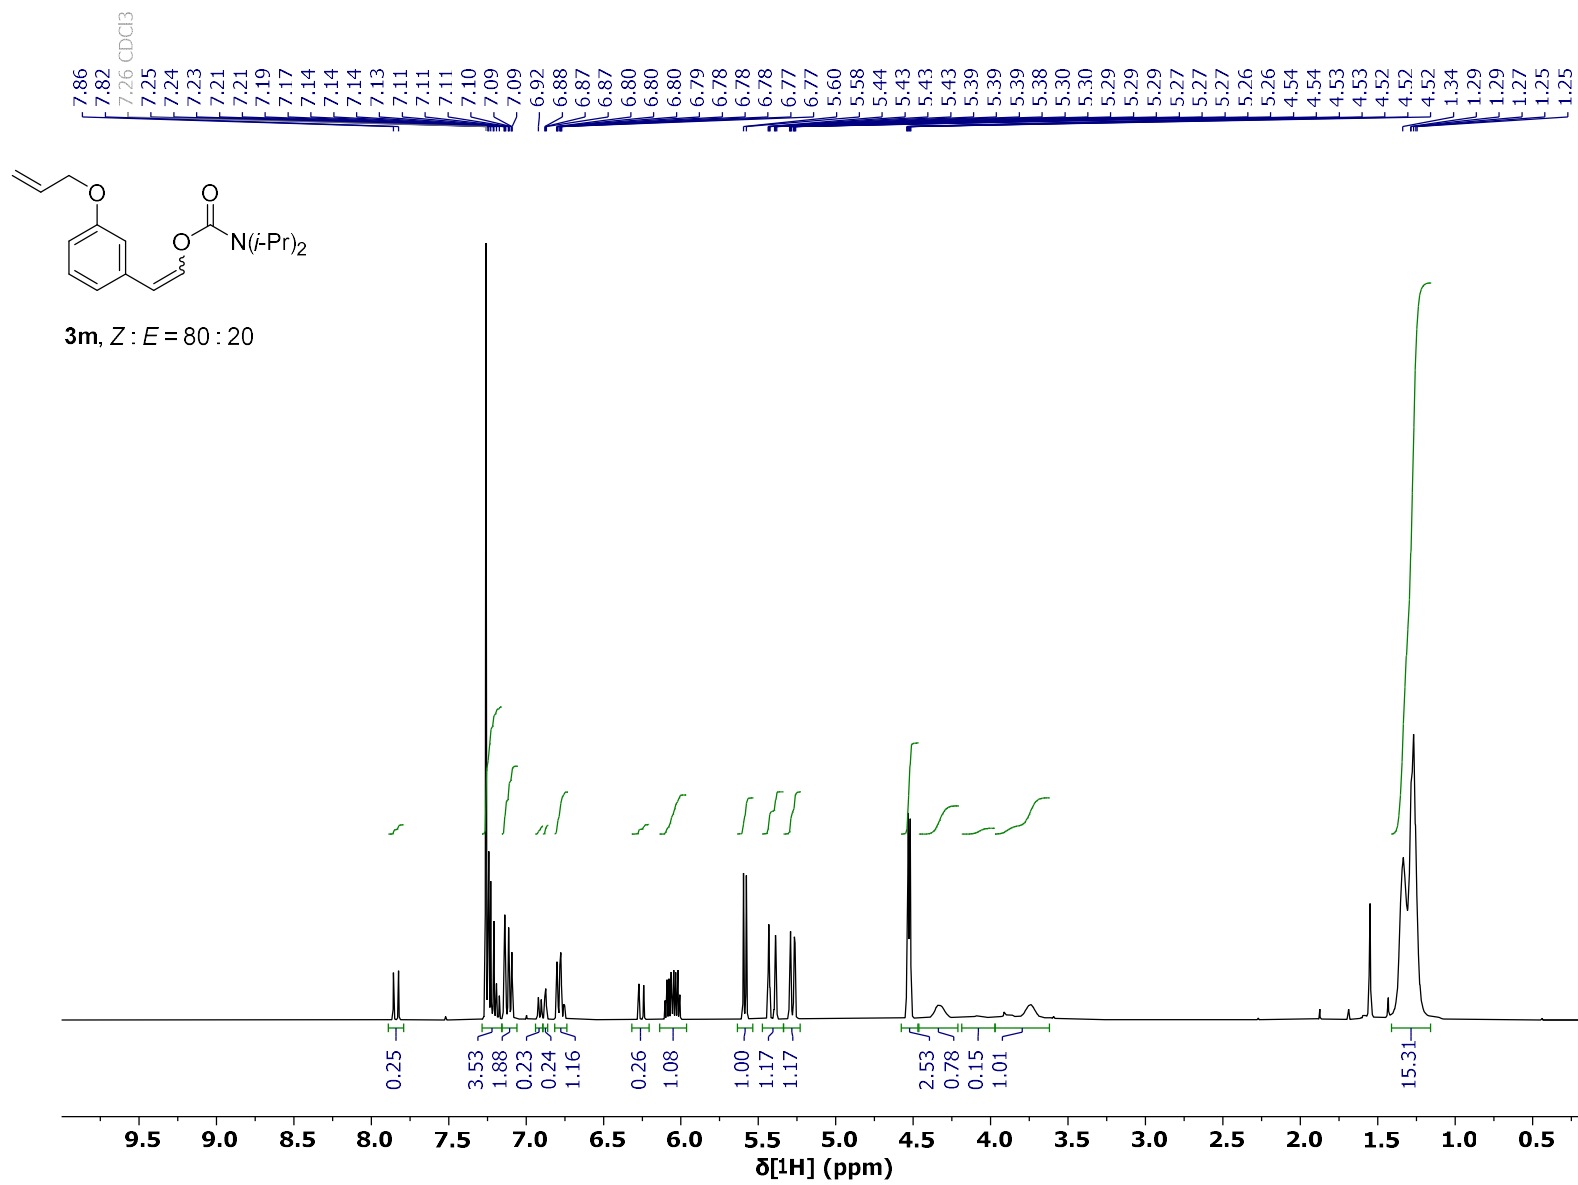

<sup>13</sup>C NMR (151 MHz, CDCl<sub>3</sub>)

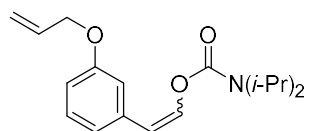

3m, Z : E = 80 : 20

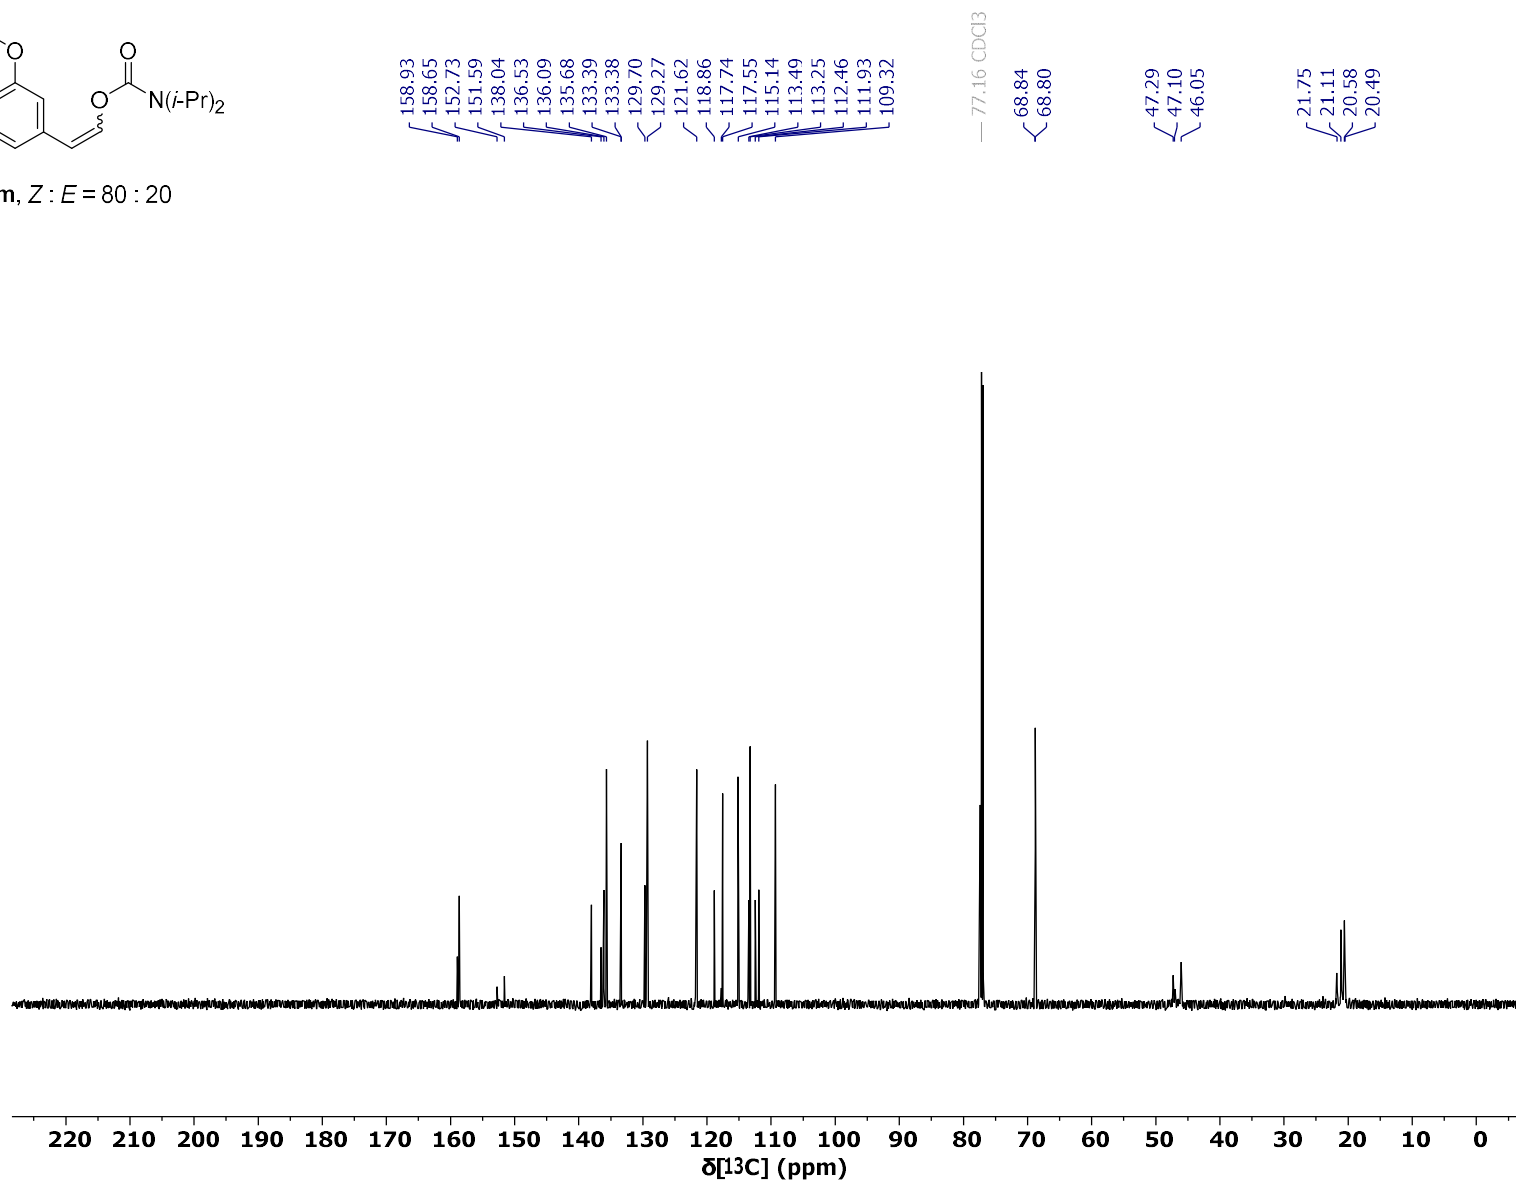

S104



<sup>1</sup>H NMR (400 MHz, CDCl<sub>3</sub>)

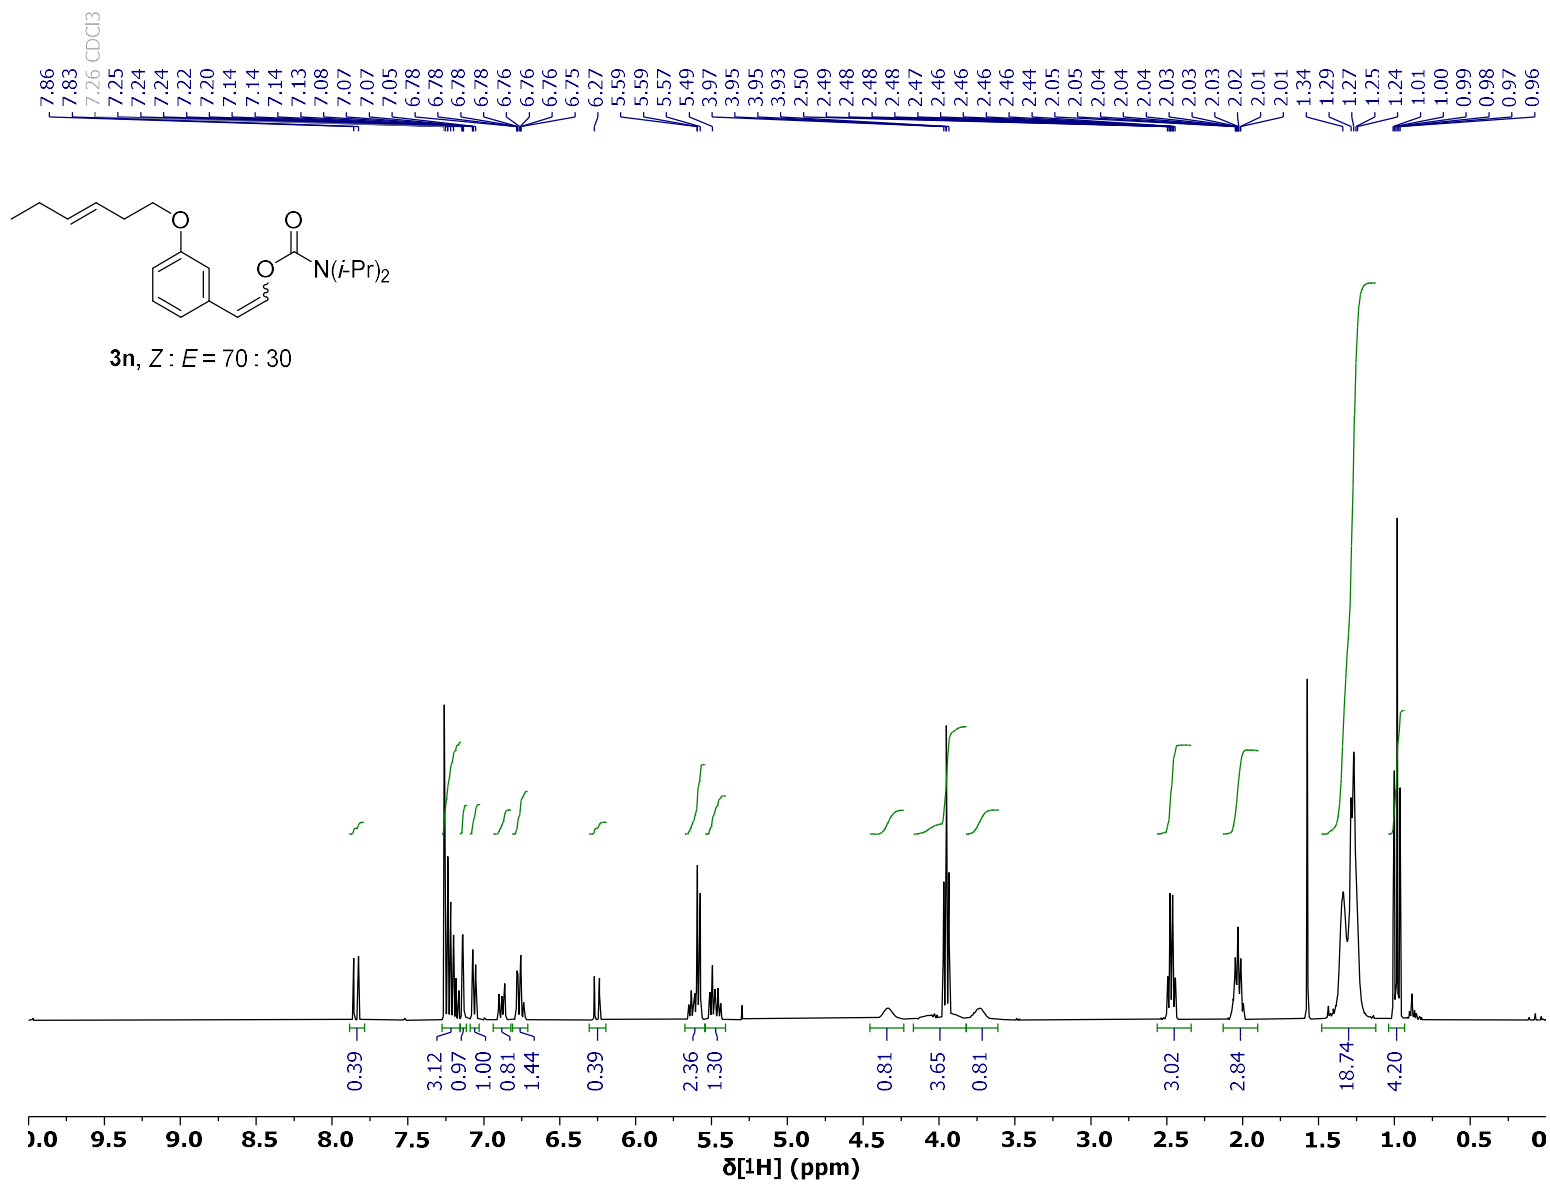

$^{13}\text{C}$  NMR (151 MHz,  $\text{CDCl}_3$ )

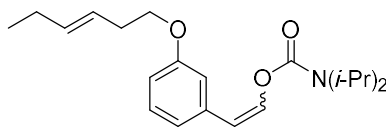

3n, Z : E = 70 : 30

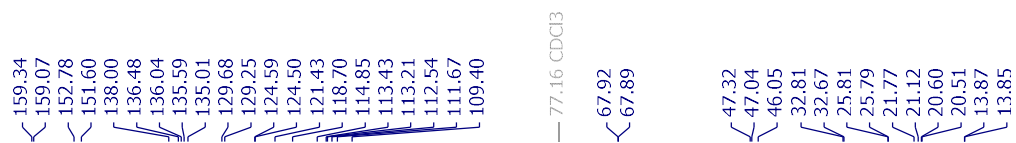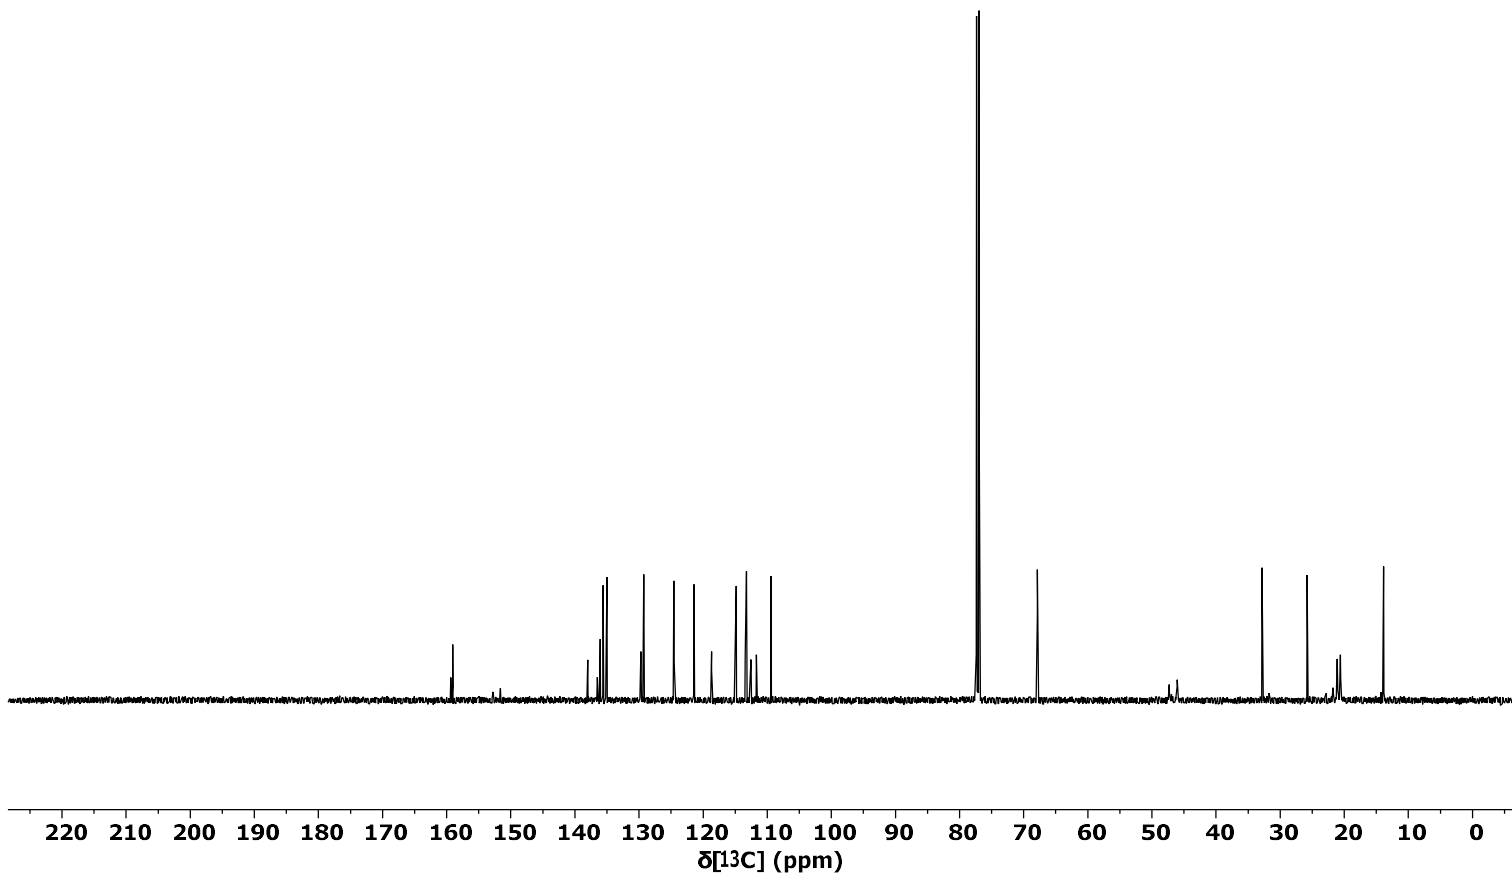

S106

<sup>1</sup>H NMR (400 MHz, CDCl<sub>3</sub>)

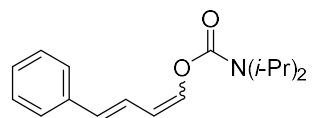

**3o**, Z : E = 85 : 15

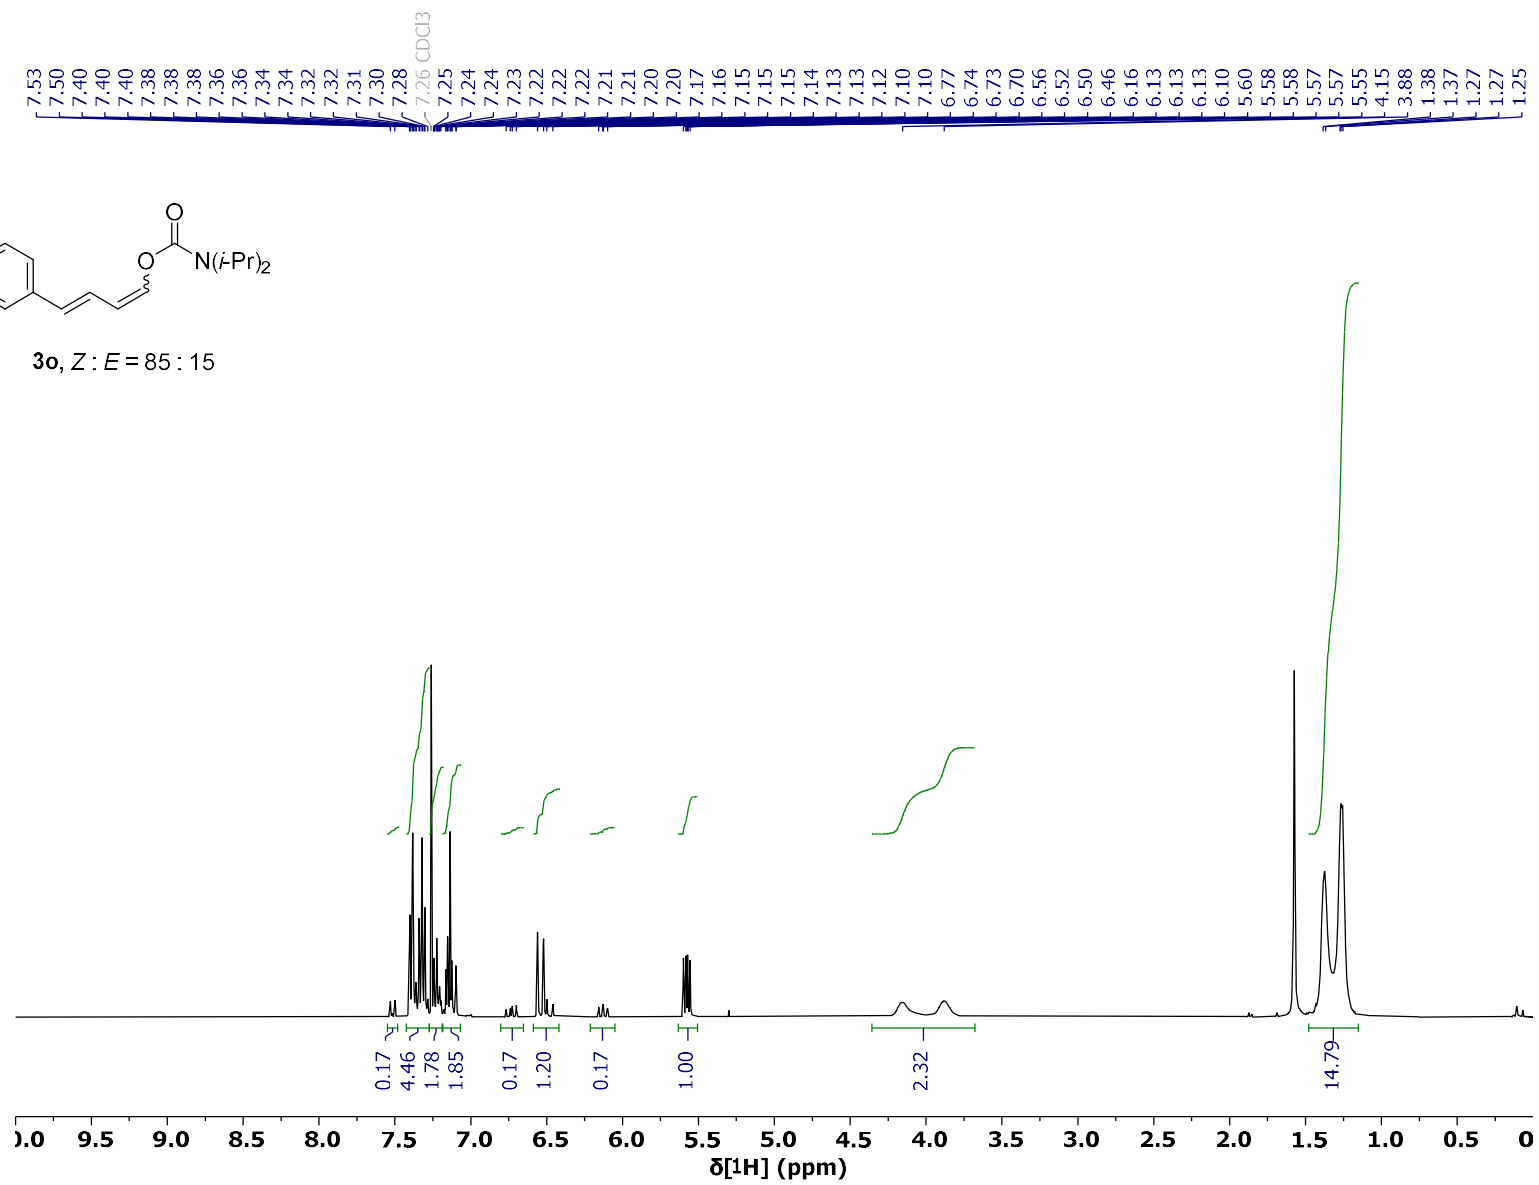

S107

<sup>13</sup>C NMR (101 MHz, CDCl<sub>3</sub>)

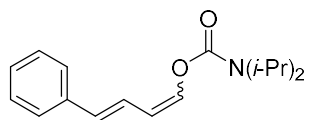

**3o**, Z : E = 85 : 15

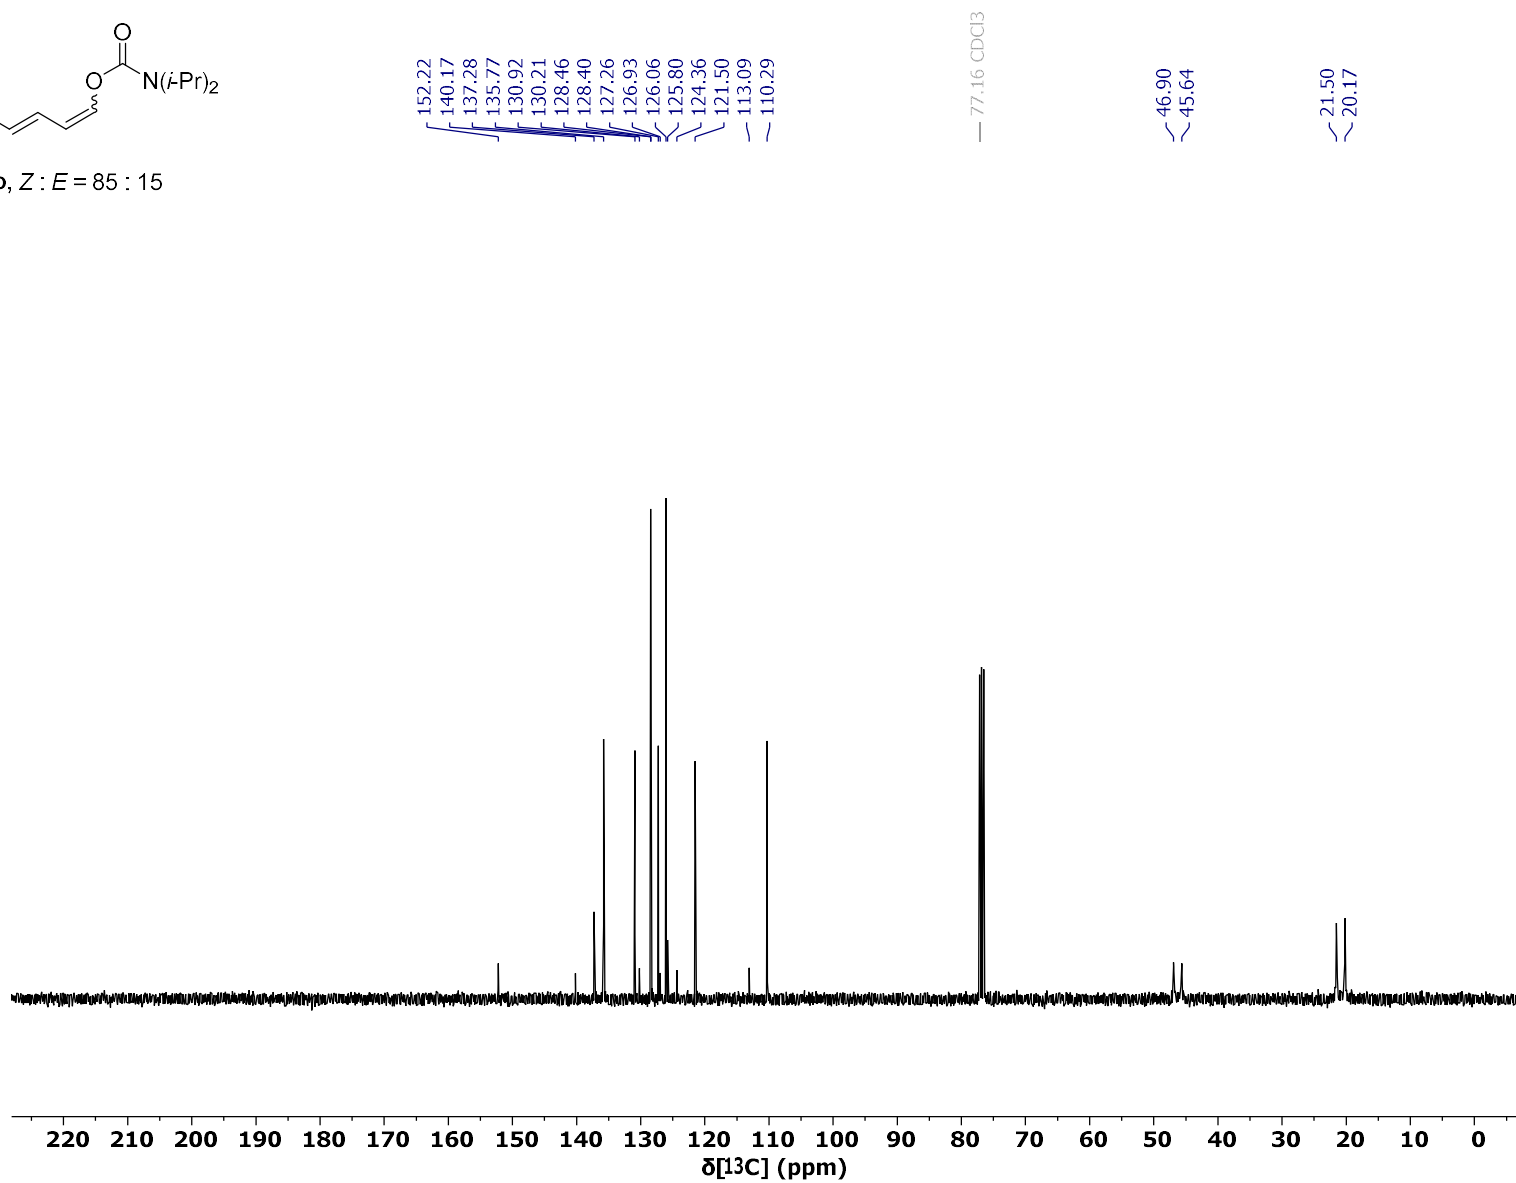

S108

<sup>1</sup>H NMR (400 MHz, CDCl<sub>3</sub>)

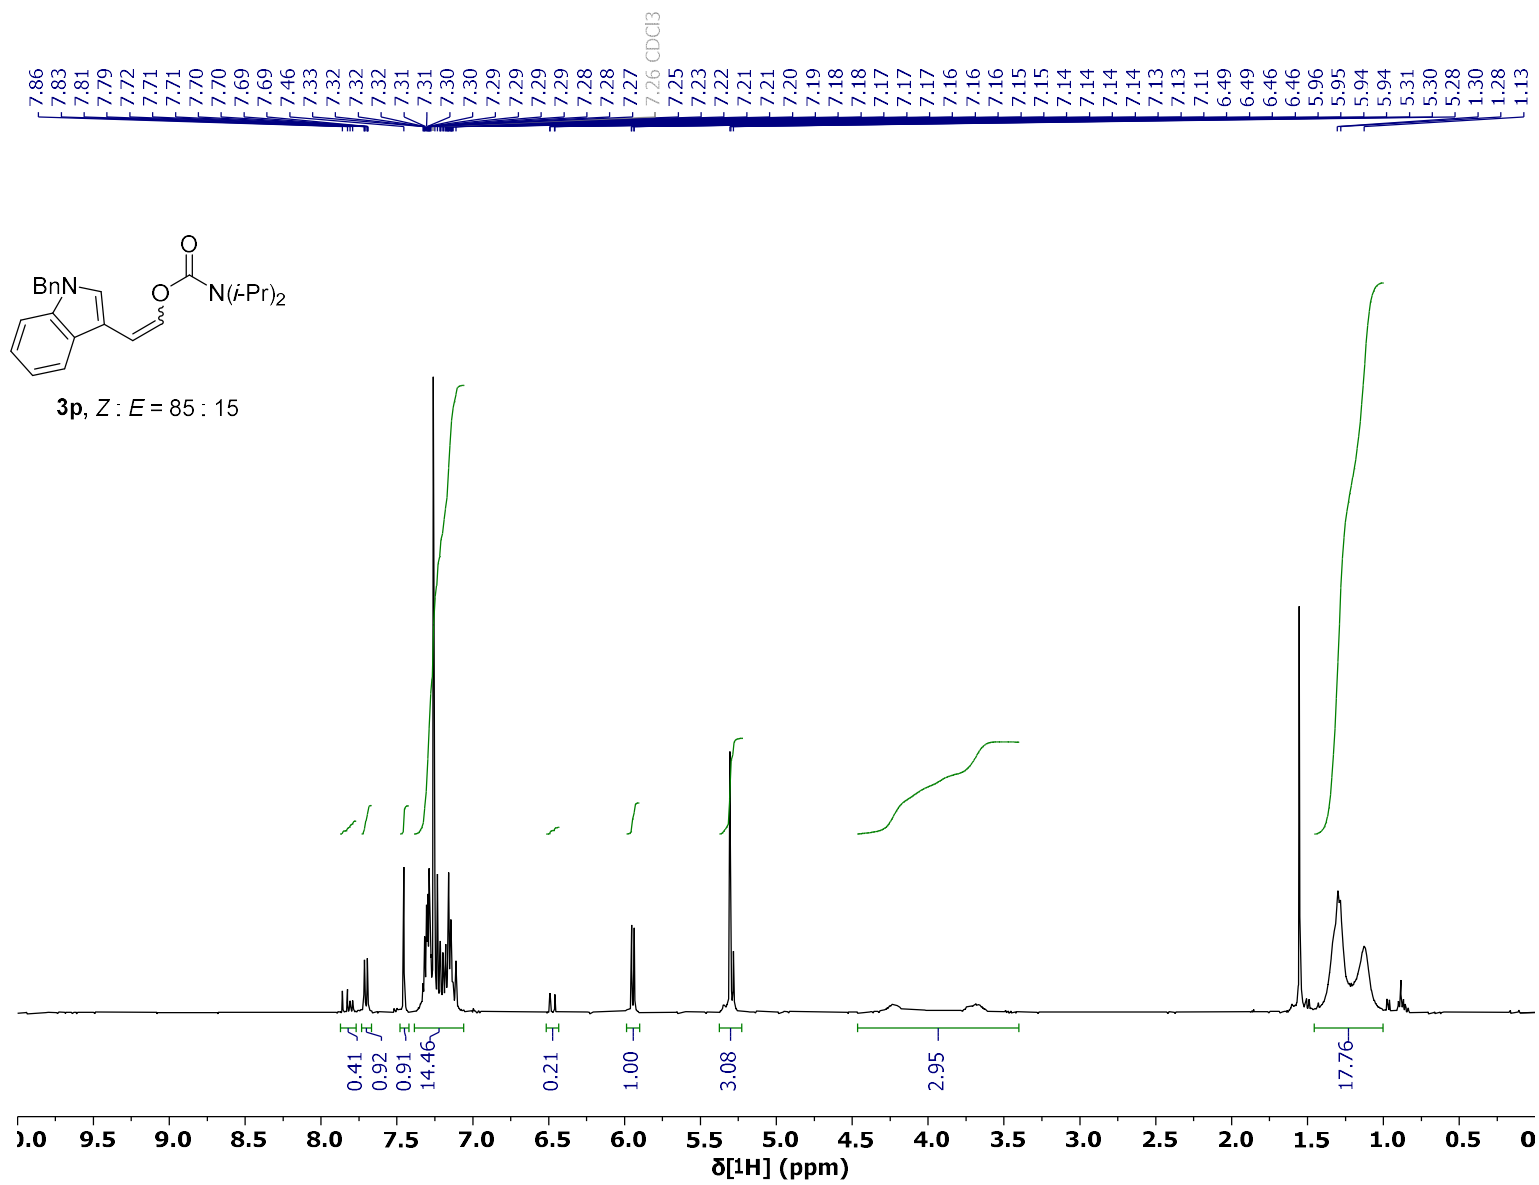

S109

<sup>13</sup>C NMR (101 MHz, CDCl<sub>3</sub>)

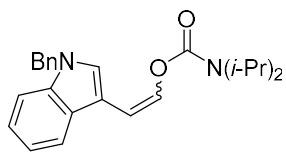

**3p**, Z : E = 85 : 15

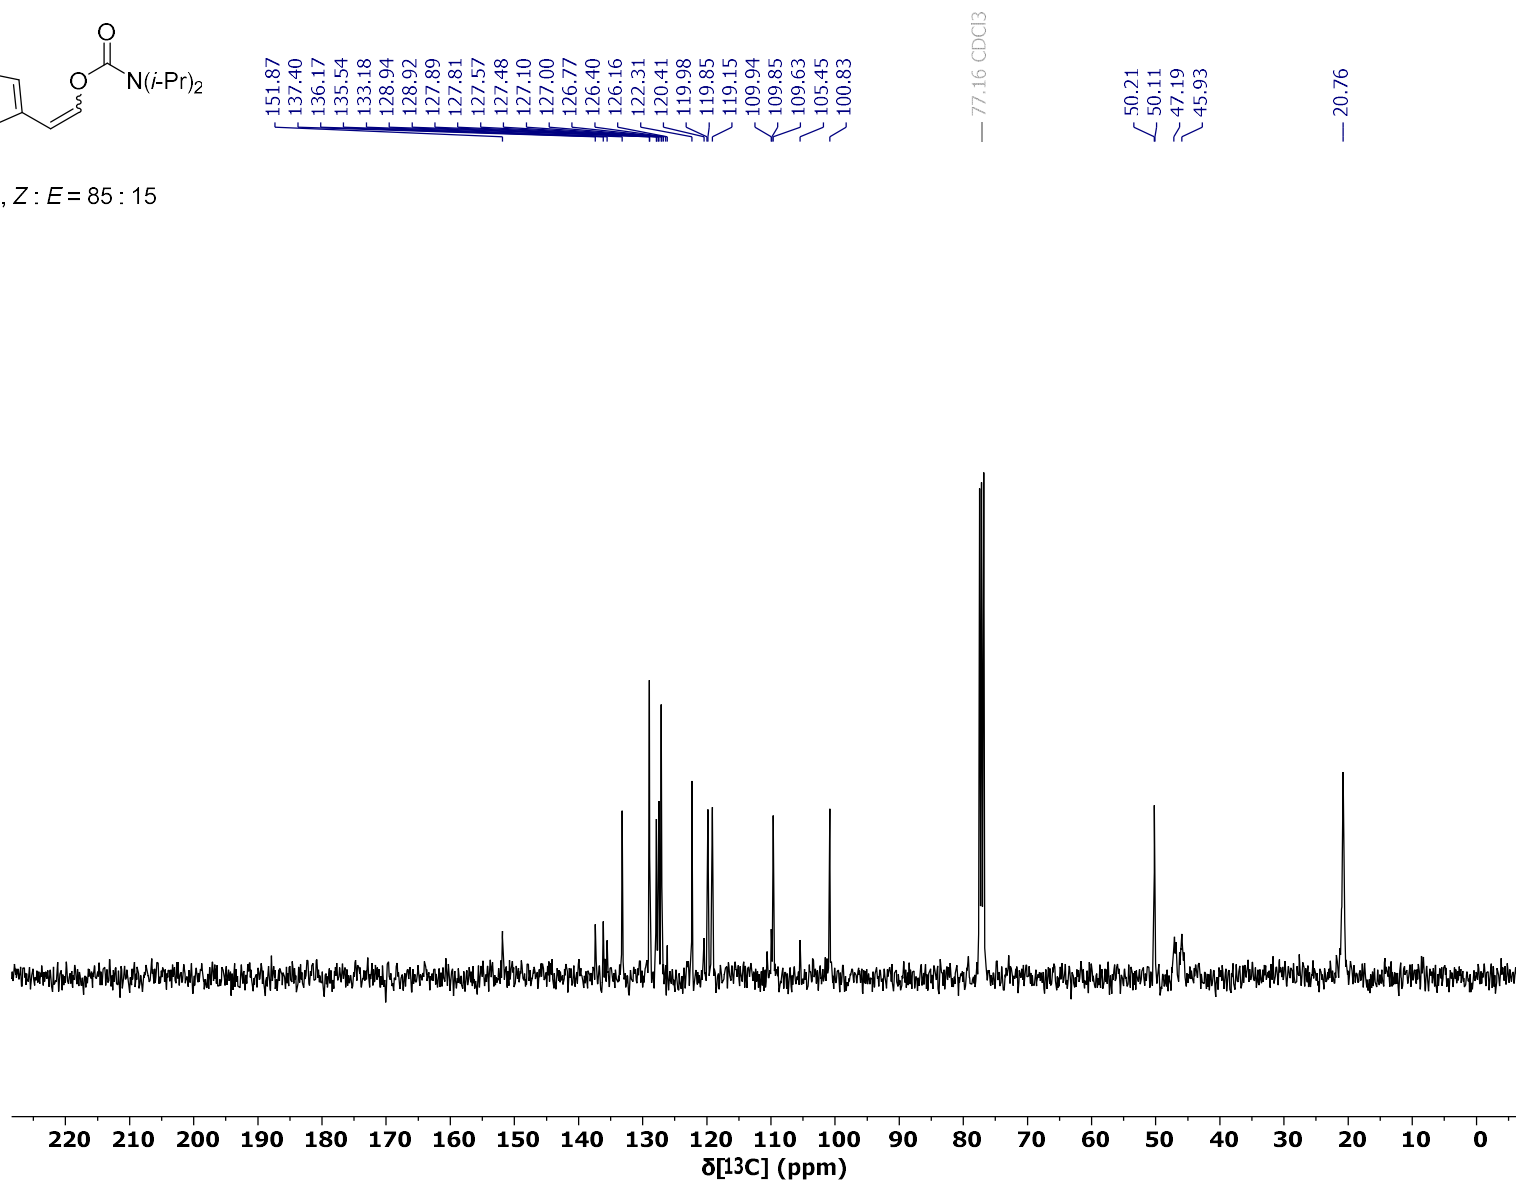

S110

<sup>1</sup>H NMR (400 MHz, CDCl<sub>3</sub>)

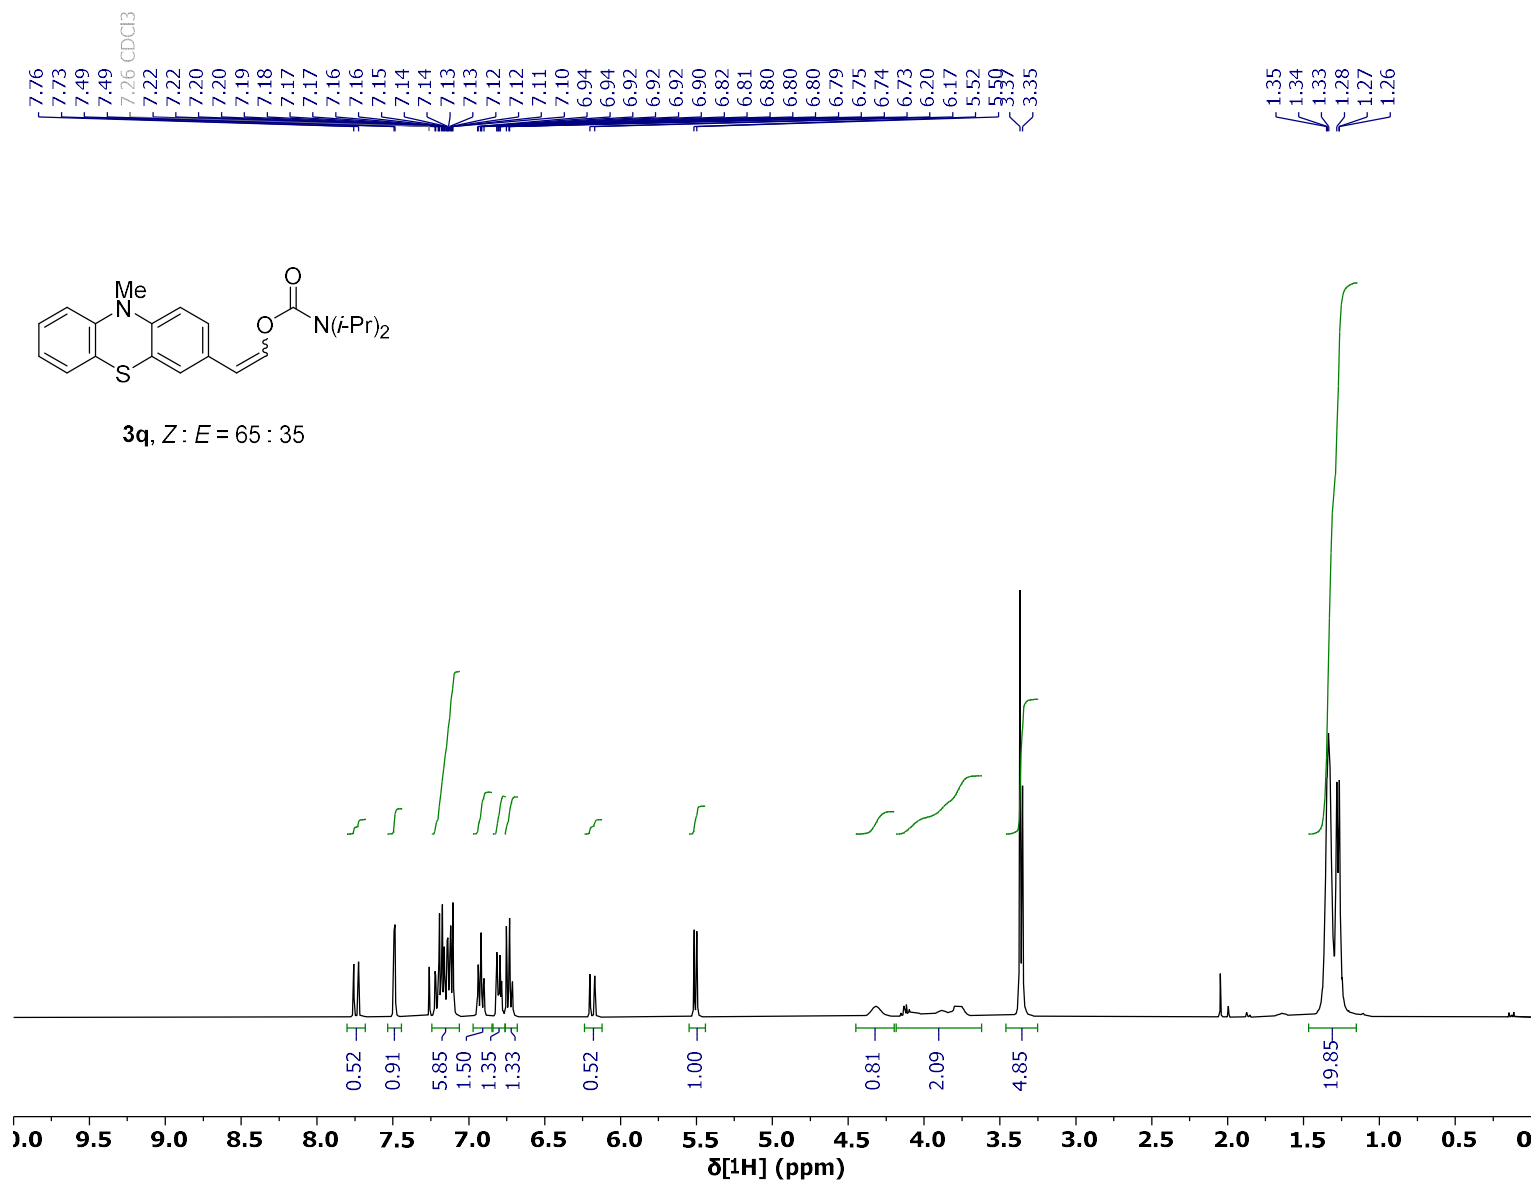

S111

$^{13}\text{C}$  NMR (151 MHz,  $\text{CDCl}_3$ )

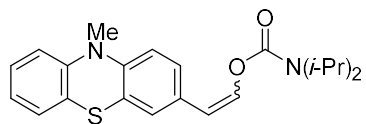

3q, Z : E = 65 : 35

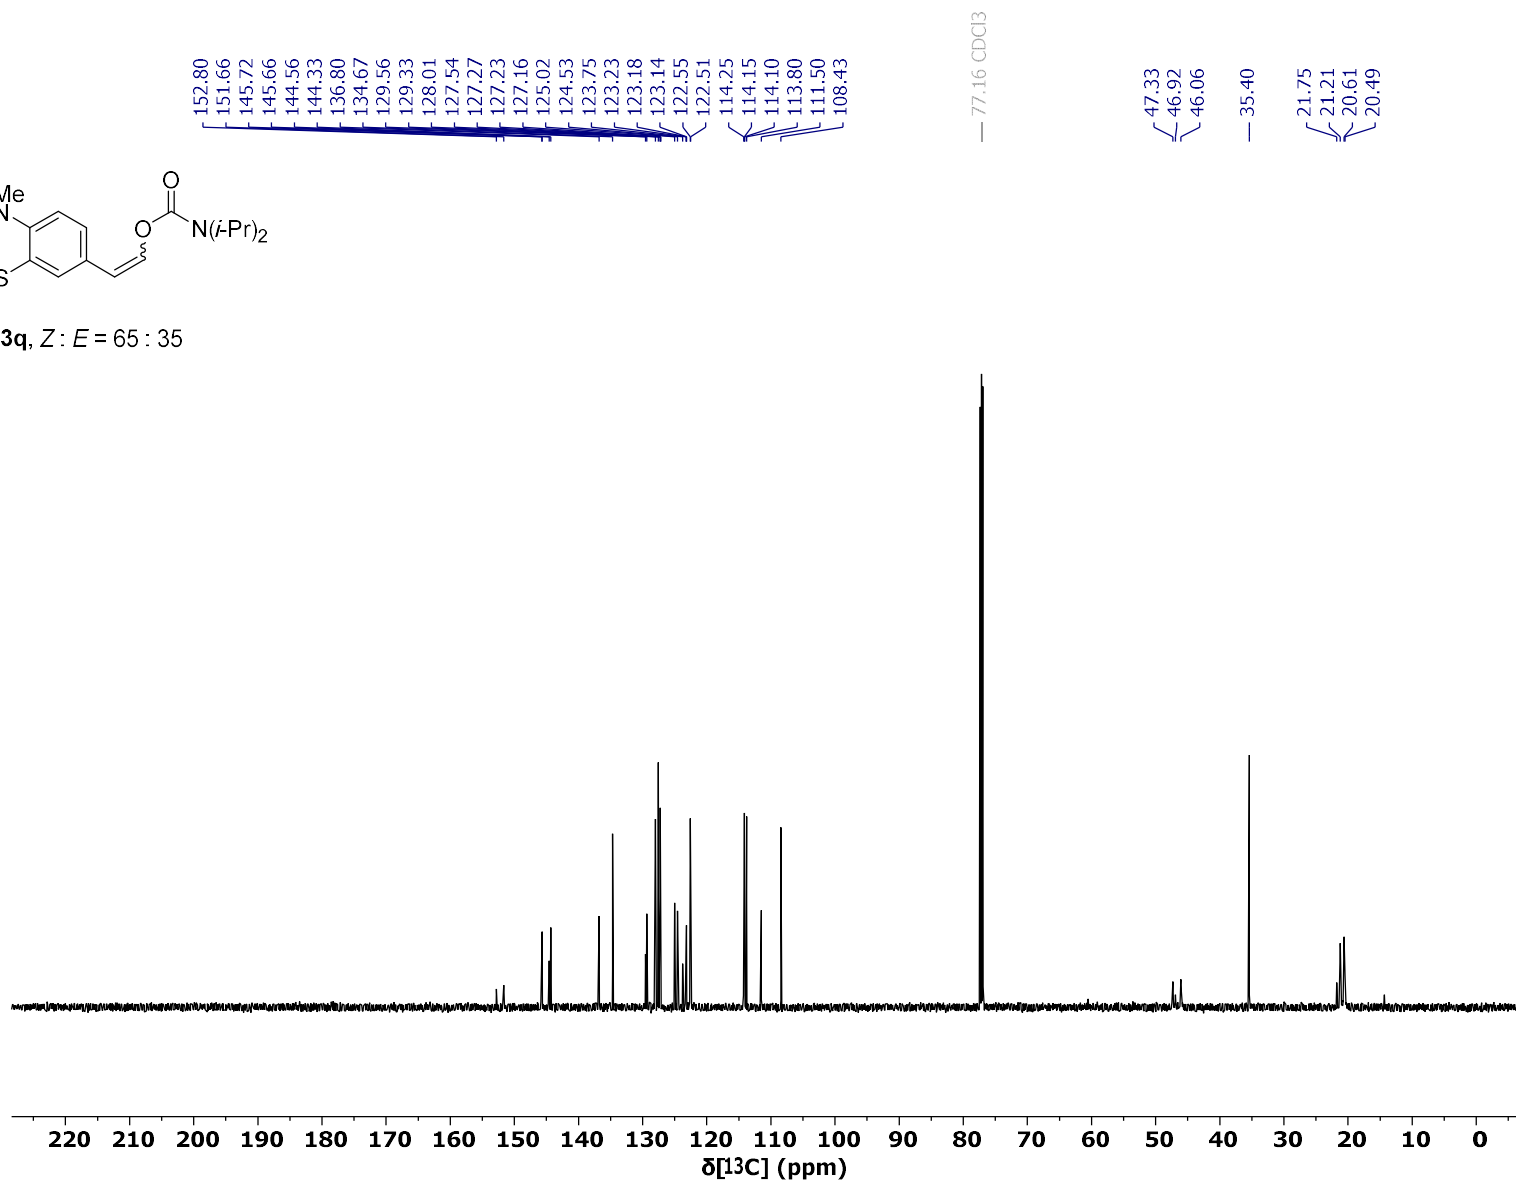

S112



<sup>1</sup>H NMR (400 MHz, CDCl<sub>3</sub>)

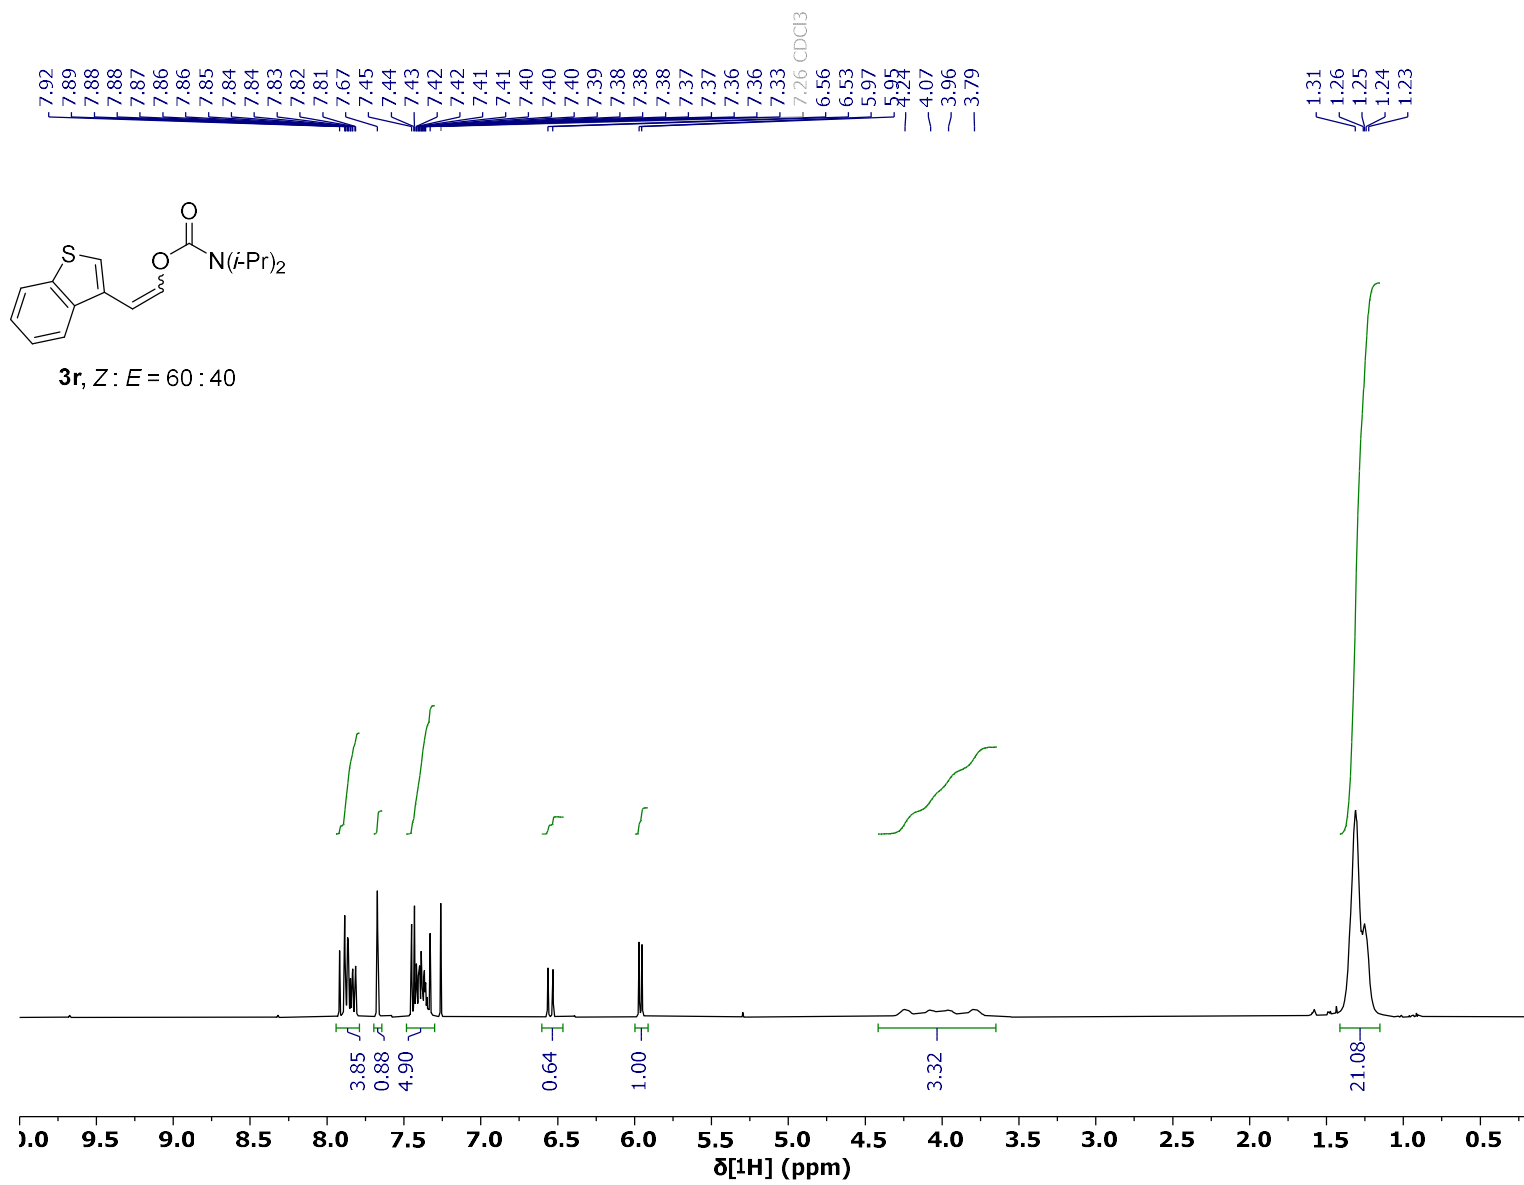

S113

$^{13}\text{C}$  NMR (101 MHz,  $\text{CDCl}_3$ )

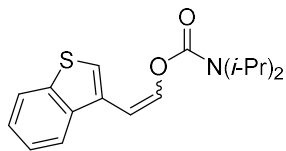

**3r**, Z : E = 60 : 40

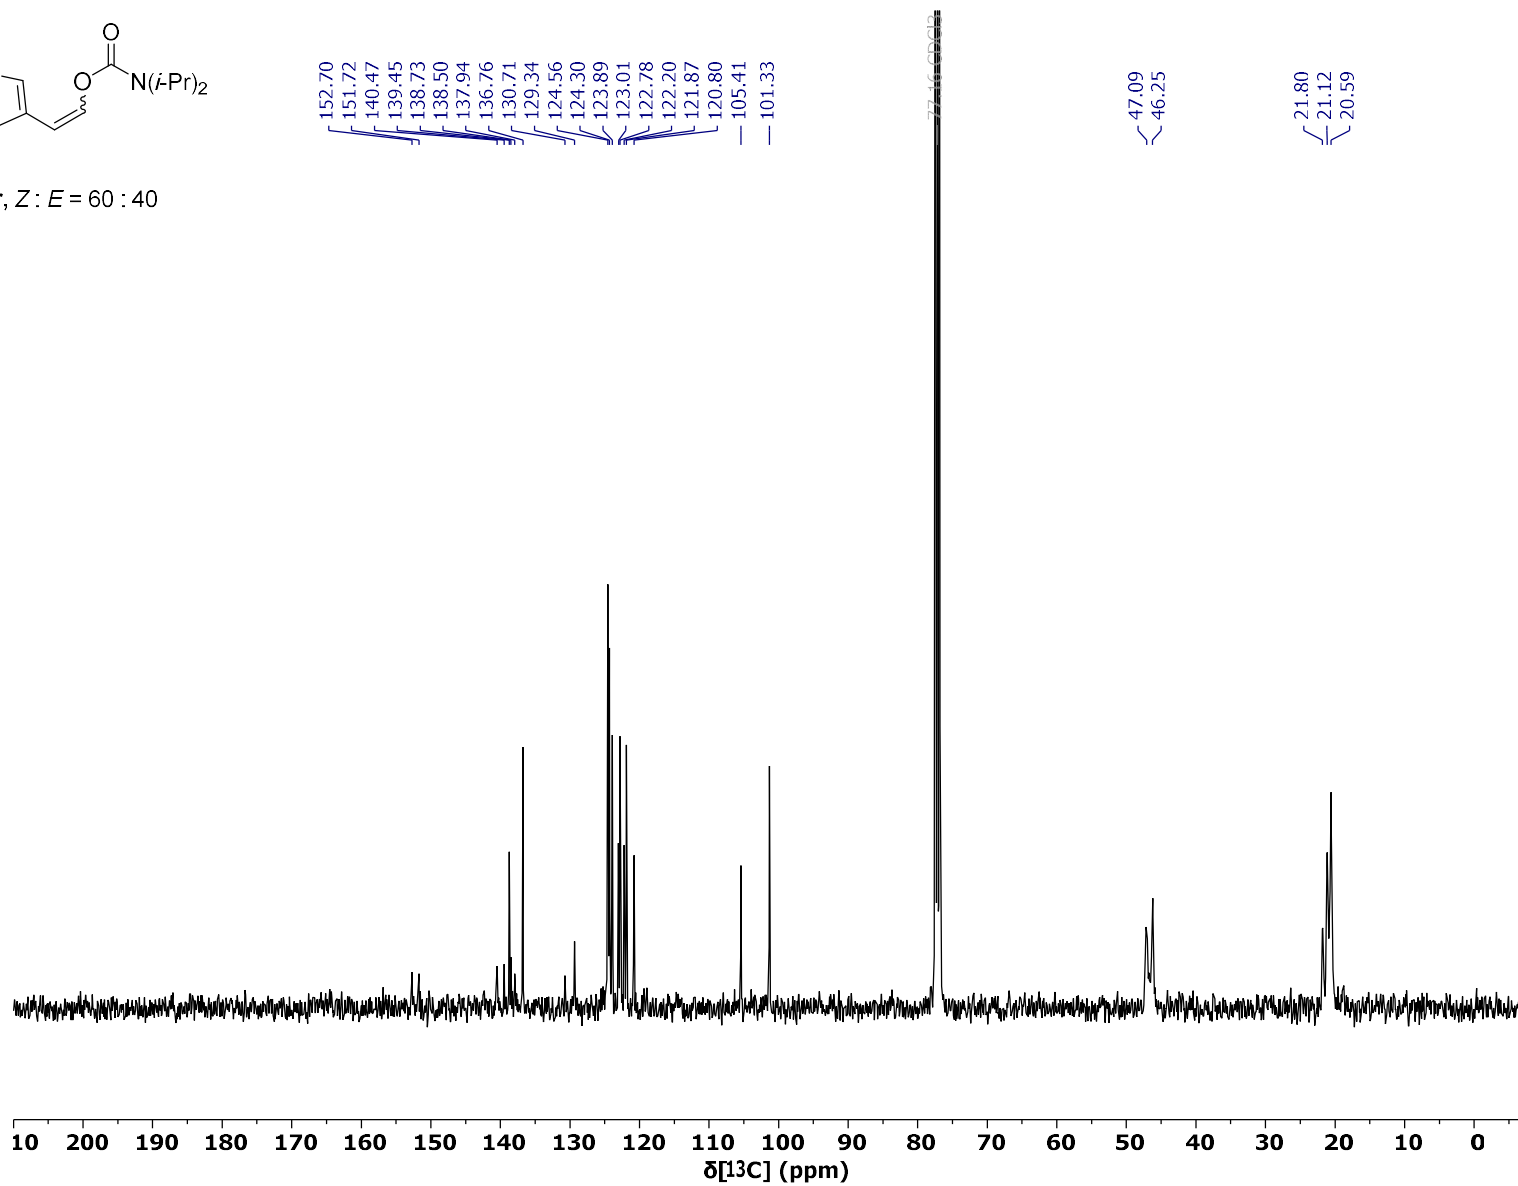

S114

<sup>1</sup>H NMR (400 MHz, CDCl<sub>3</sub>)

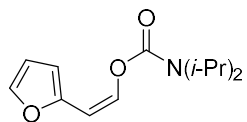

**3s**, Z : E = 90 : 10

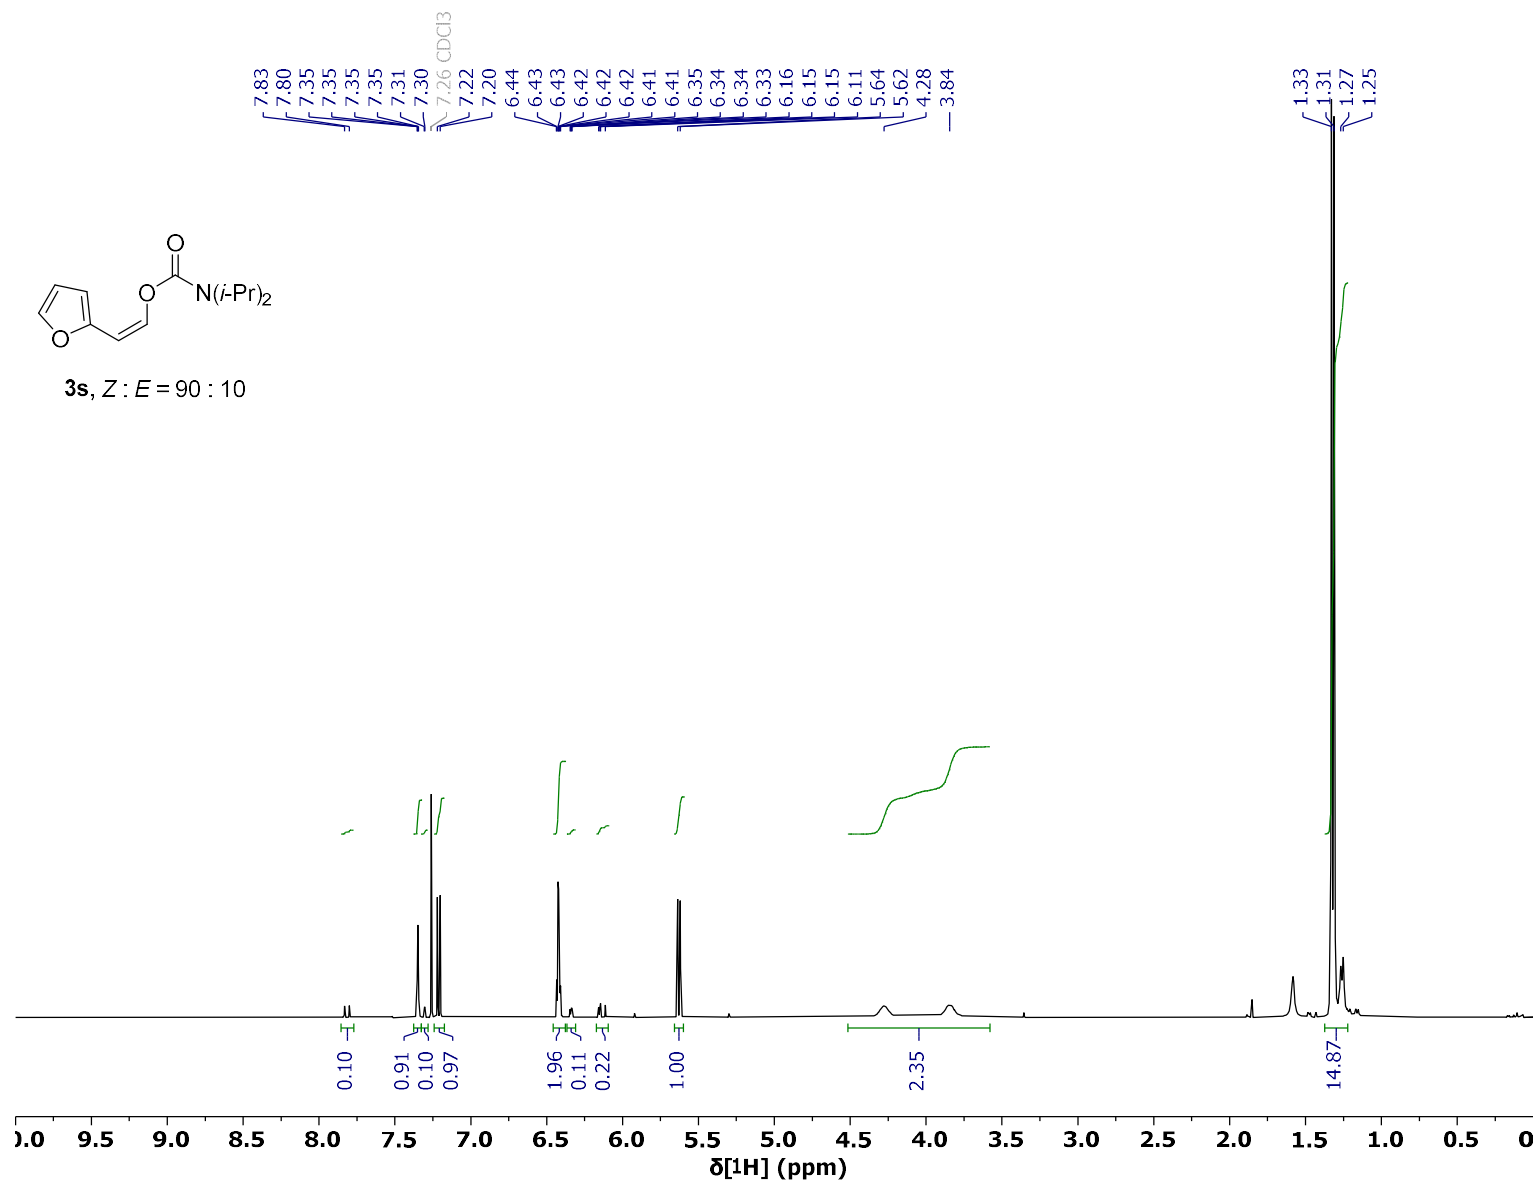

S115

<sup>13</sup>C NMR (101 MHz, CDCl<sub>3</sub>)

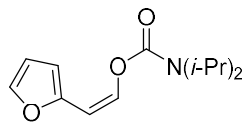

**3s**, Z : E = 90 : 10

151.68  
150.20  
141.18  
133.94  
111.41  
108.57  
99.33  
77.16 CDCl<sub>3</sub>  
47.01  
46.36  
21.05  
20.56

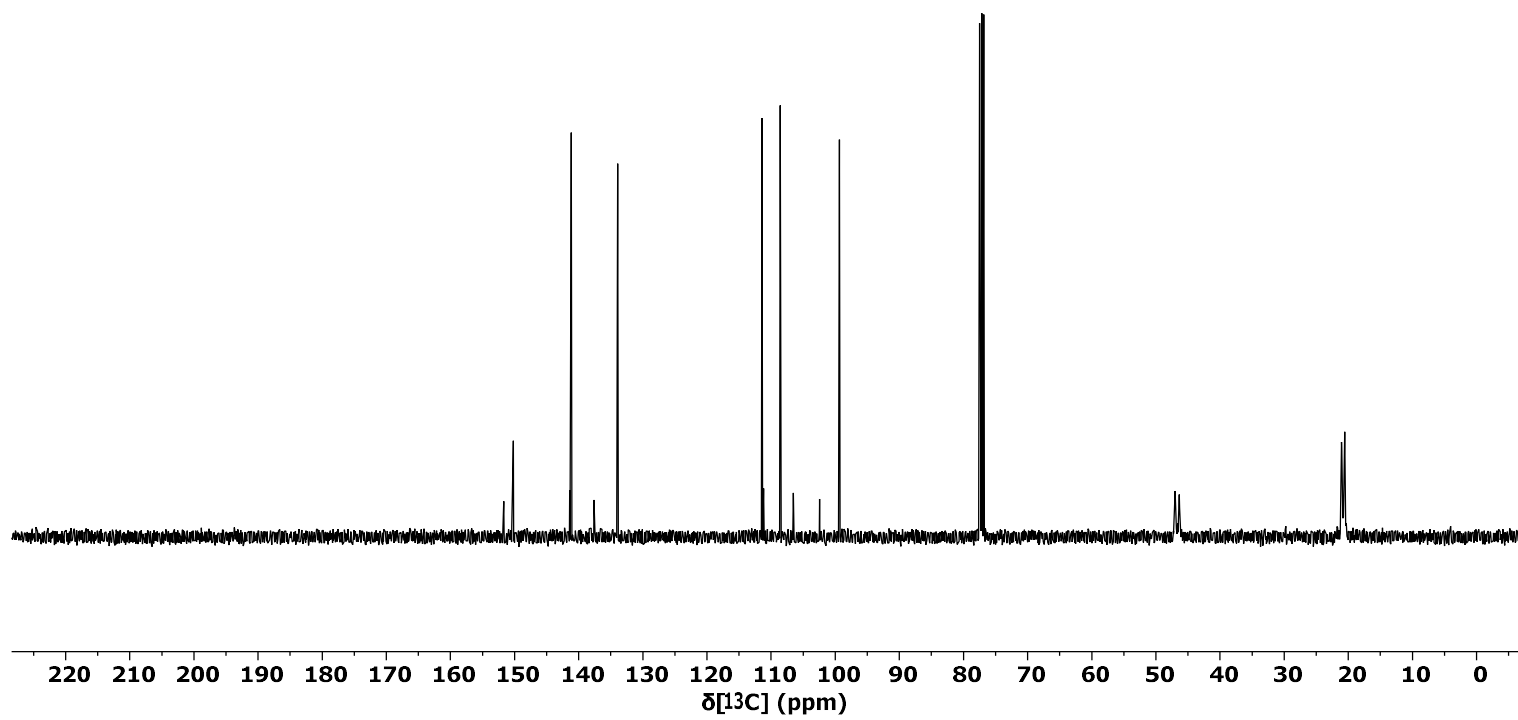

<sup>1</sup>H NMR (400 MHz, CDCl<sub>3</sub>)

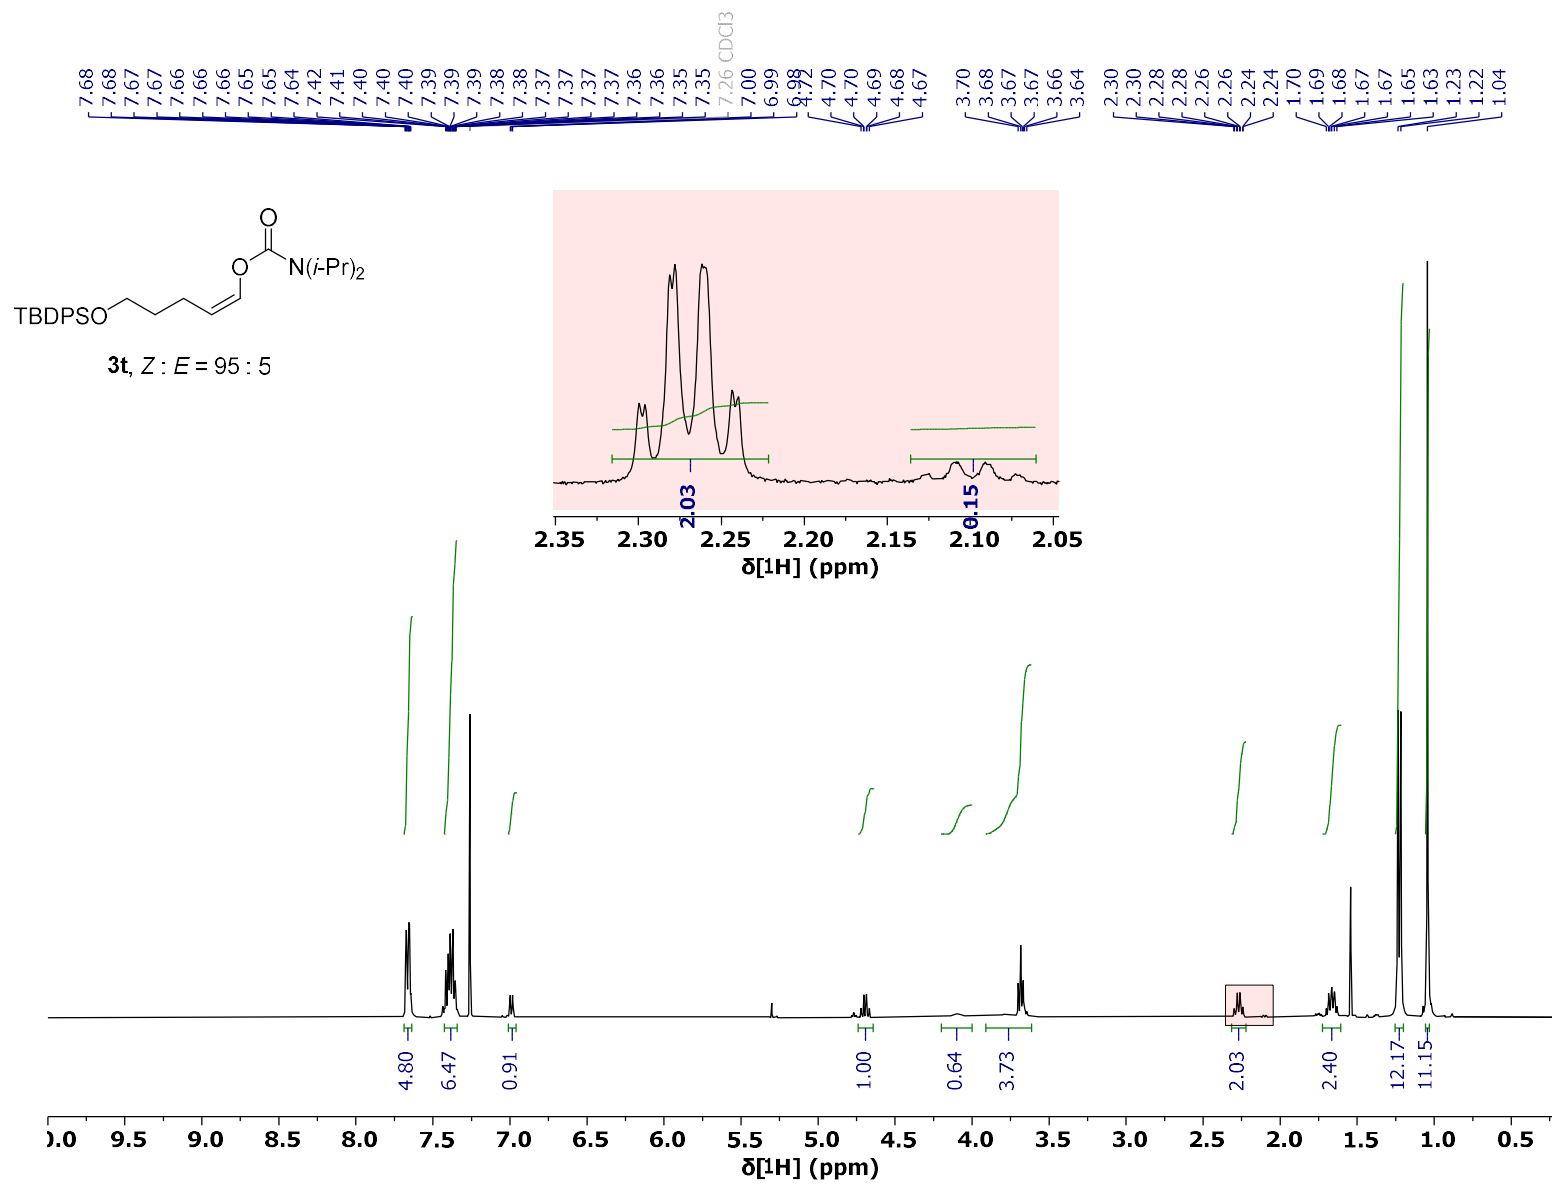

<sup>13</sup>C NMR (151 MHz, CDCl<sub>3</sub>)

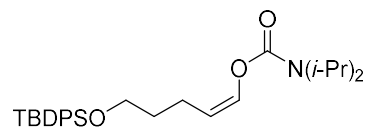

**3t**, Z : E = 95 : 5

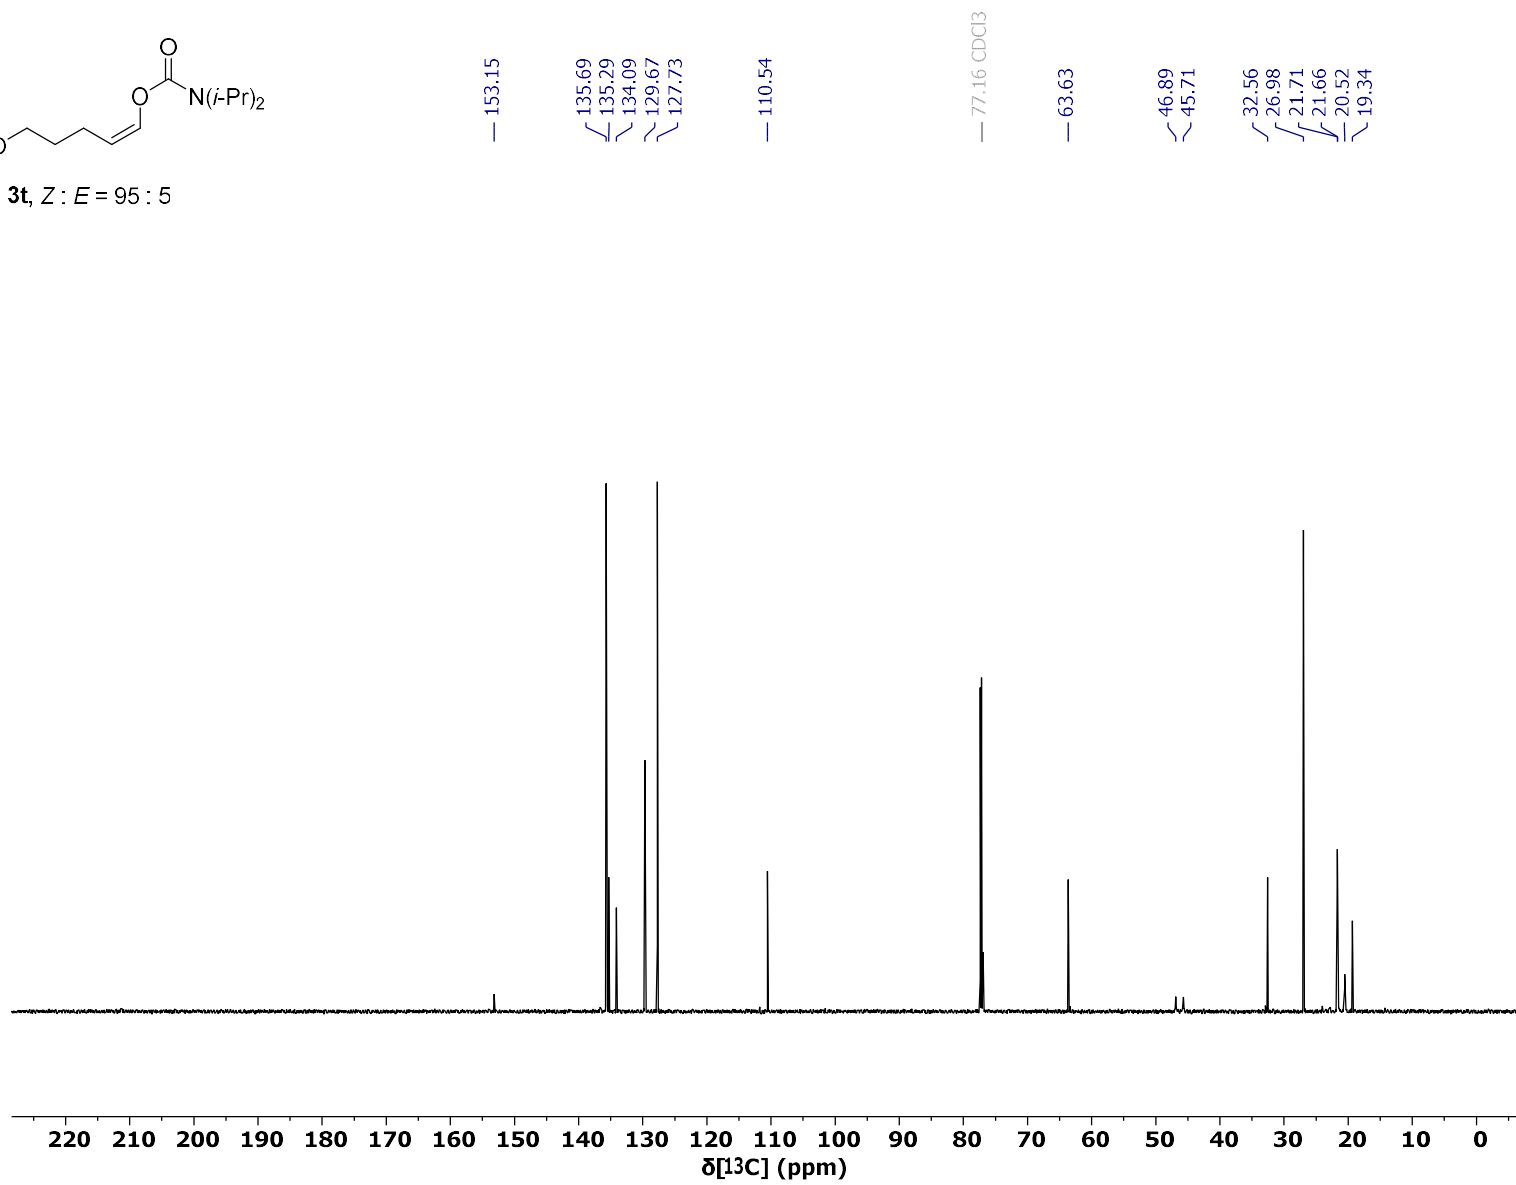

S118

<sup>1</sup>H NMR (400 MHz, CDCl<sub>3</sub>)

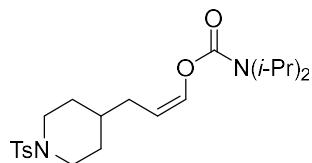

**3u**, Z : E = 95 : 5

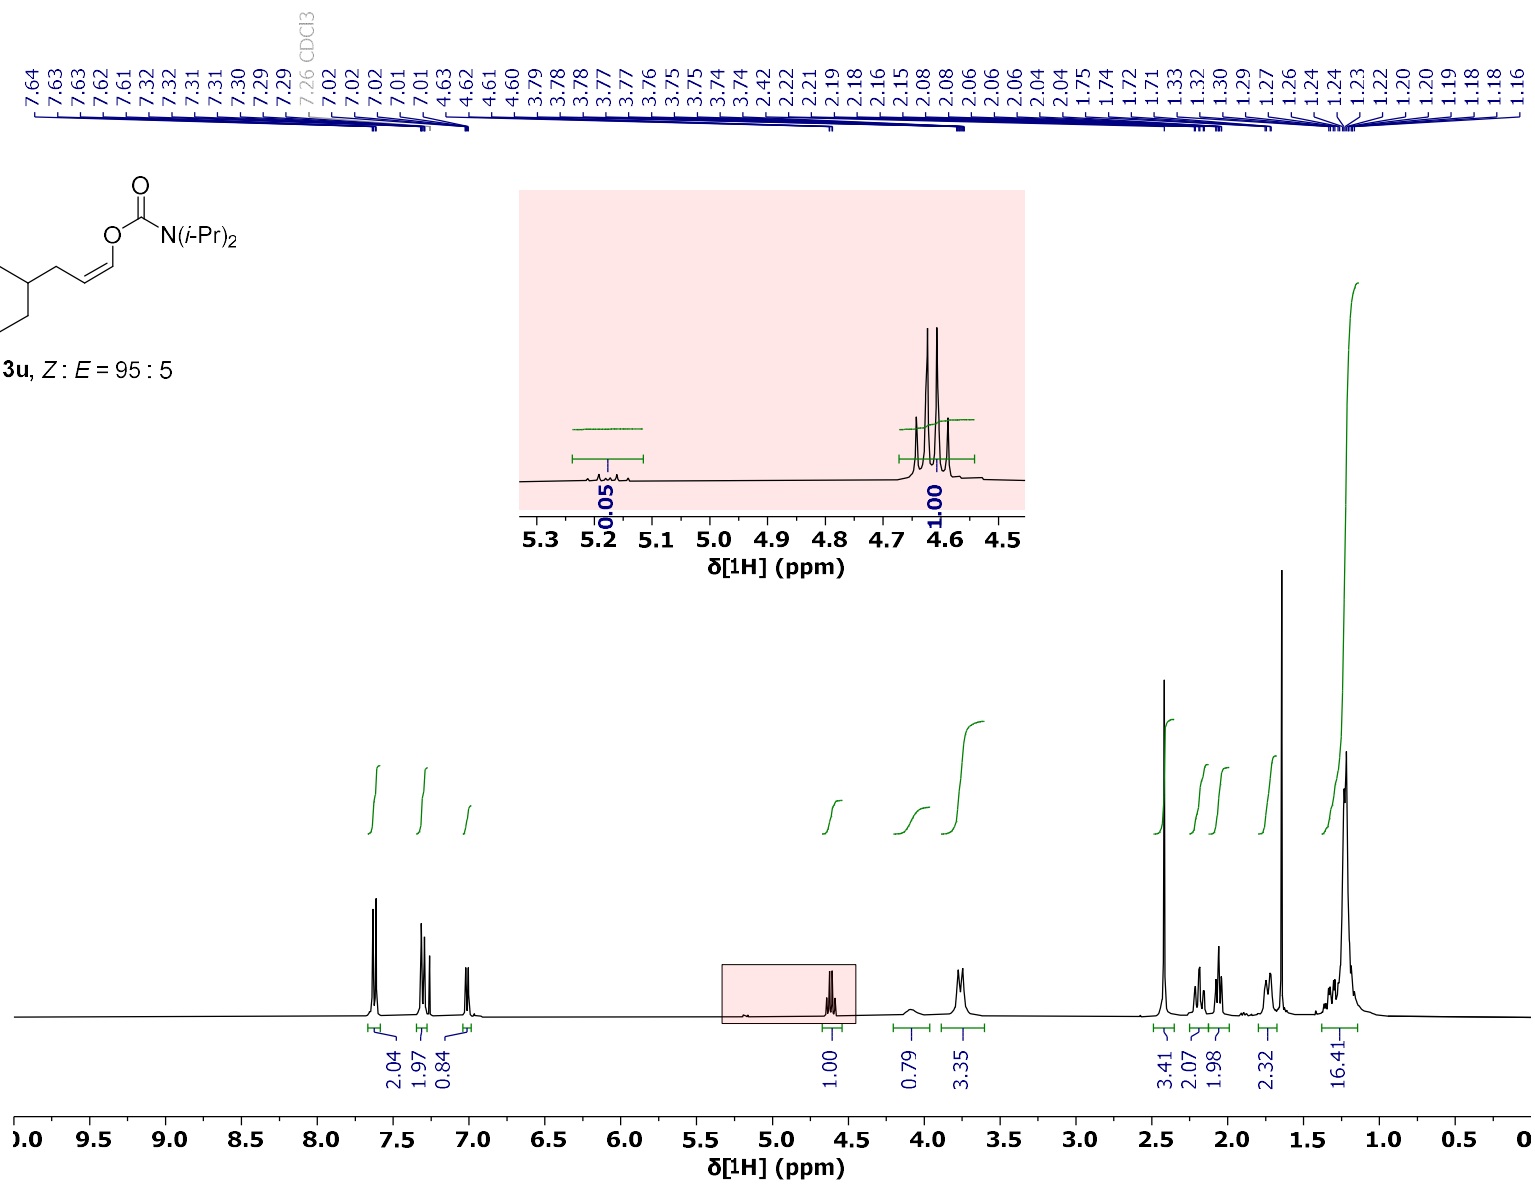

<sup>13</sup>C NMR (101 MHz, CDCl<sub>3</sub>)

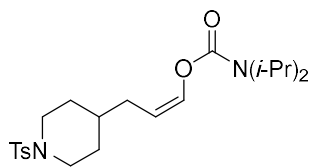

**3u**, Z : E = 95 : 5

— 153.03  
~ 143.48  
/ 136.41  
/ 133.25  
/ 129.67  
/ 127.83  
— 108.10  
— 77.16 CDCl<sub>3</sub>  
{ 46.88  
{ 46.60  
{ 45.75  
{ 35.73  
{ 31.56  
{ 31.45  
{ 27.80  
{ 21.63  
{ 20.49

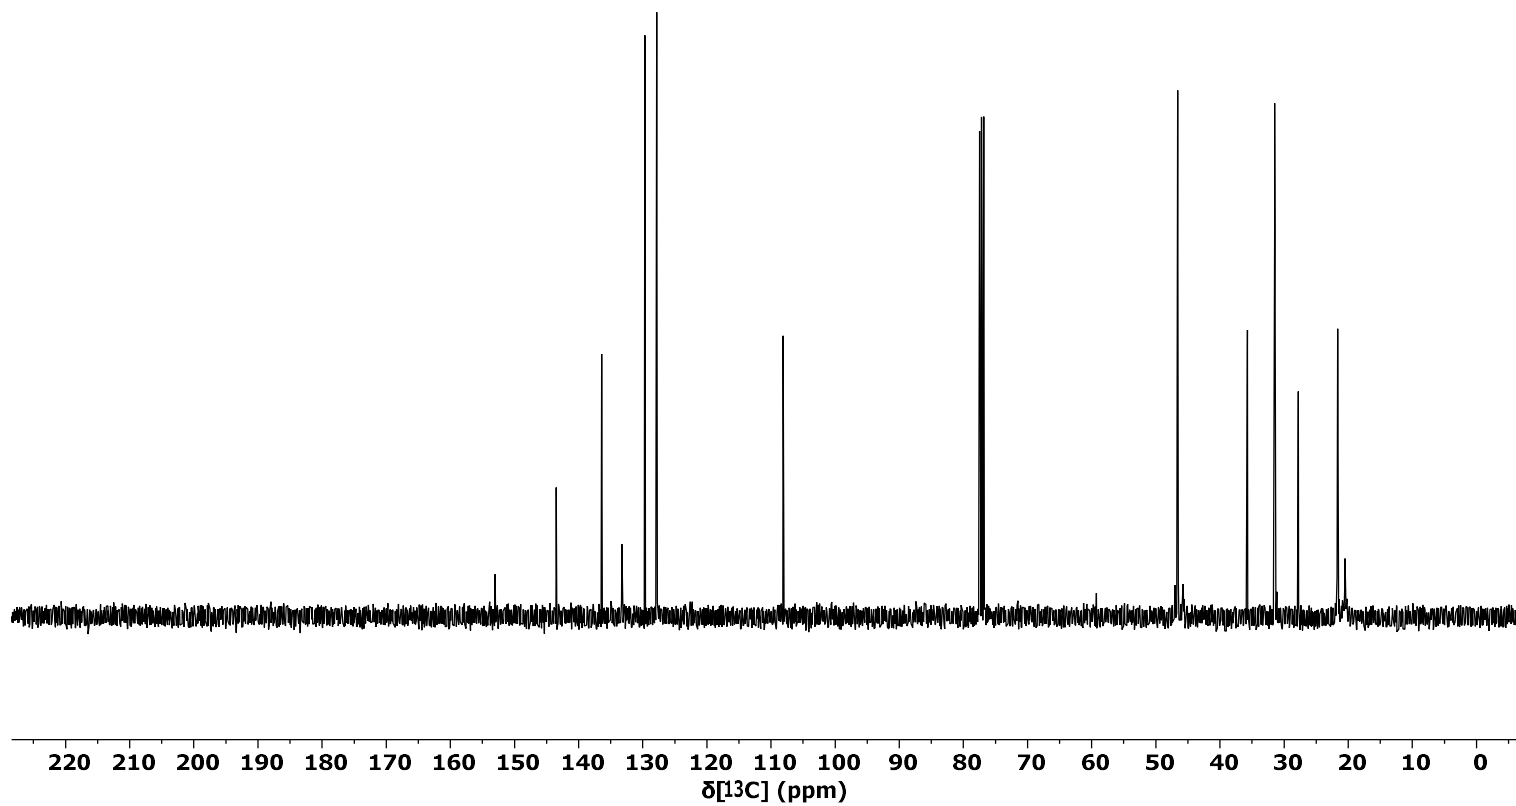

S120



<sup>1</sup>H NMR (400 MHz, CDCl<sub>3</sub>)

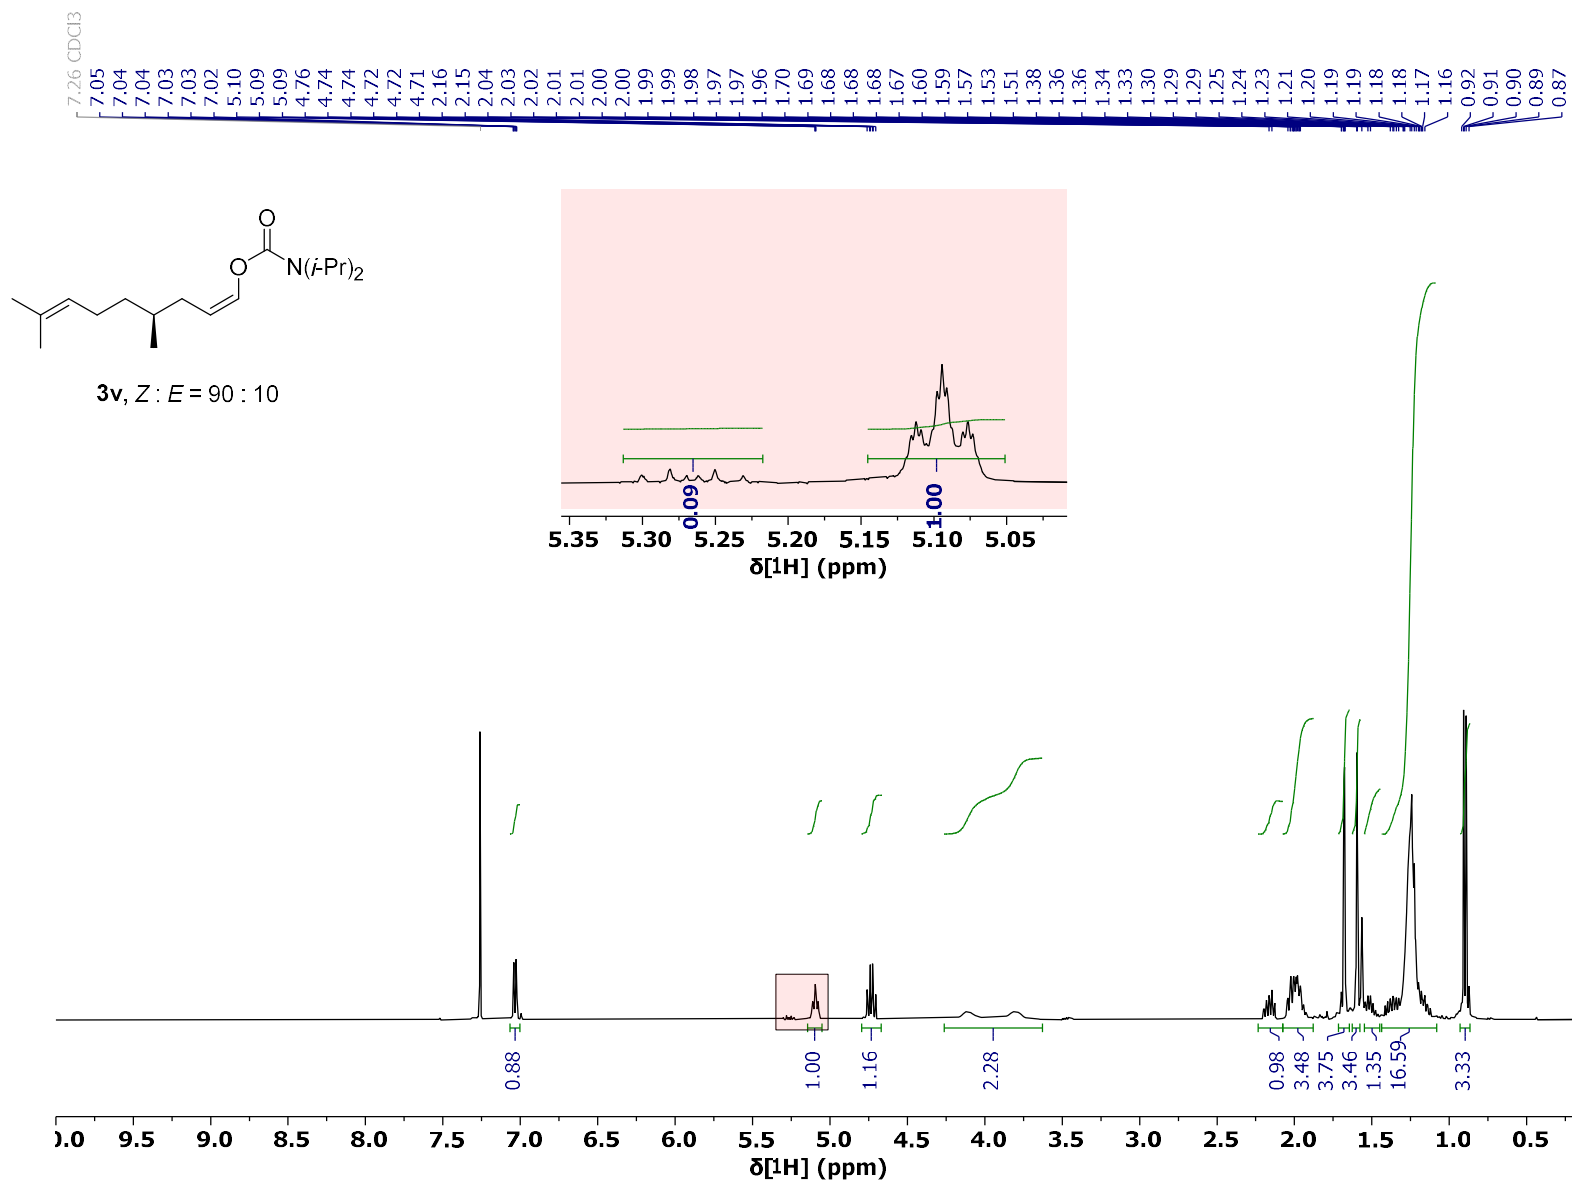

<sup>13</sup>C NMR (101 MHz, CDCl<sub>3</sub>)

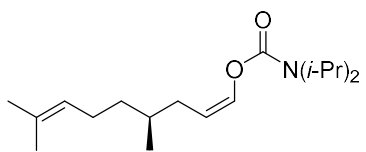

**3v**, Z : E = 90 : 10

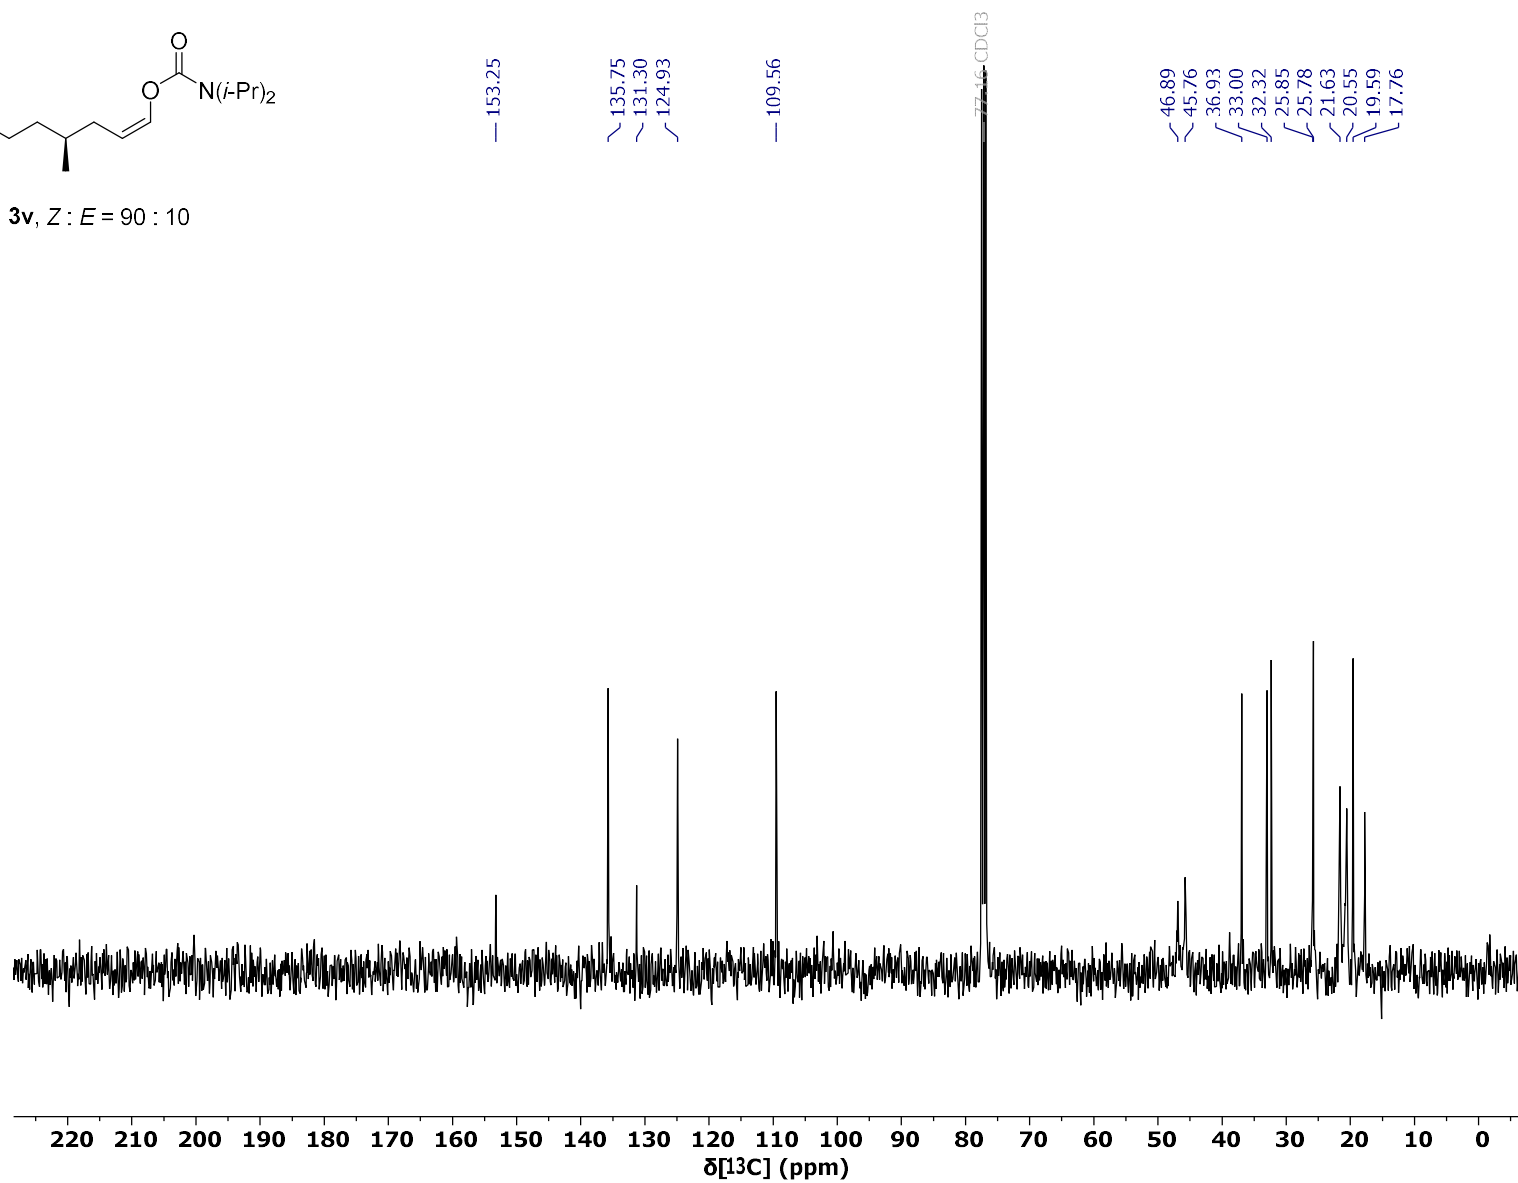

S122

<sup>1</sup>H NMR (400 MHz, CDCl<sub>3</sub>)

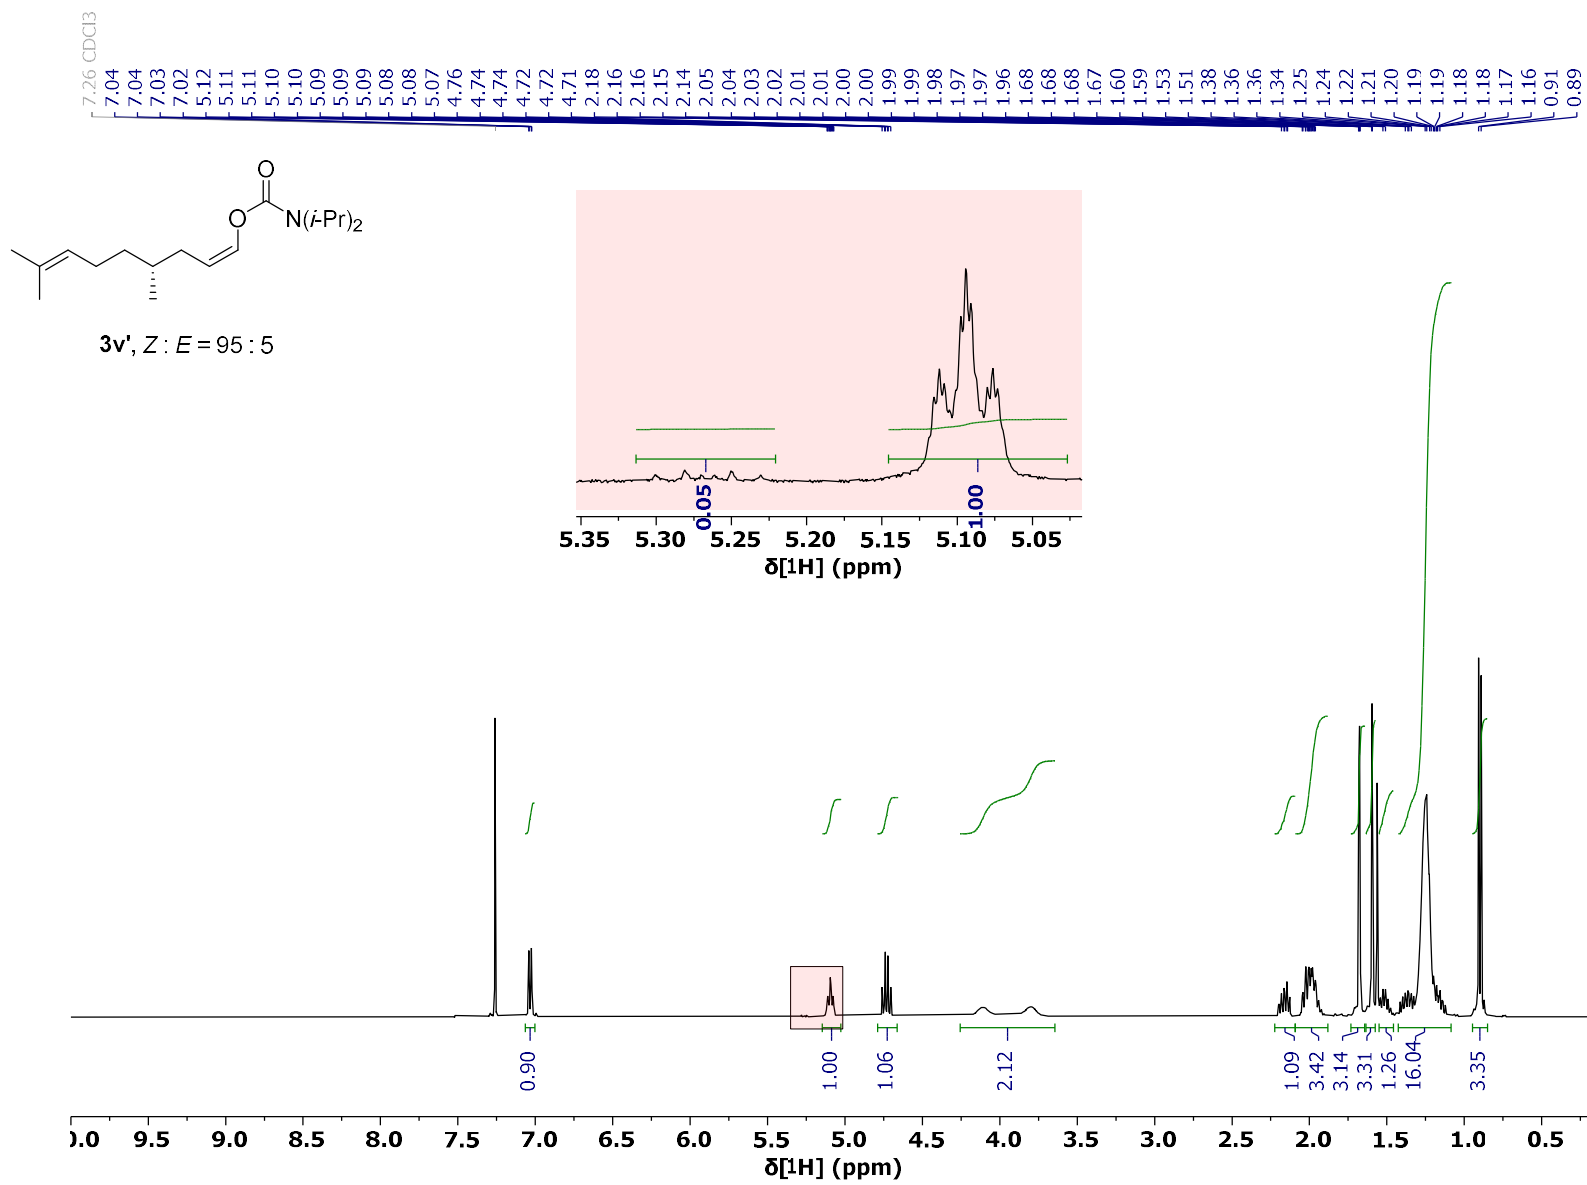

<sup>13</sup>C NMR (101 MHz, CDCl<sub>3</sub>)

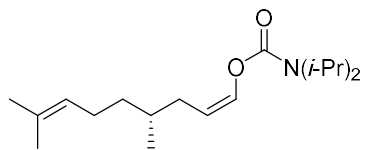

3v', Z : E = 95 : 5

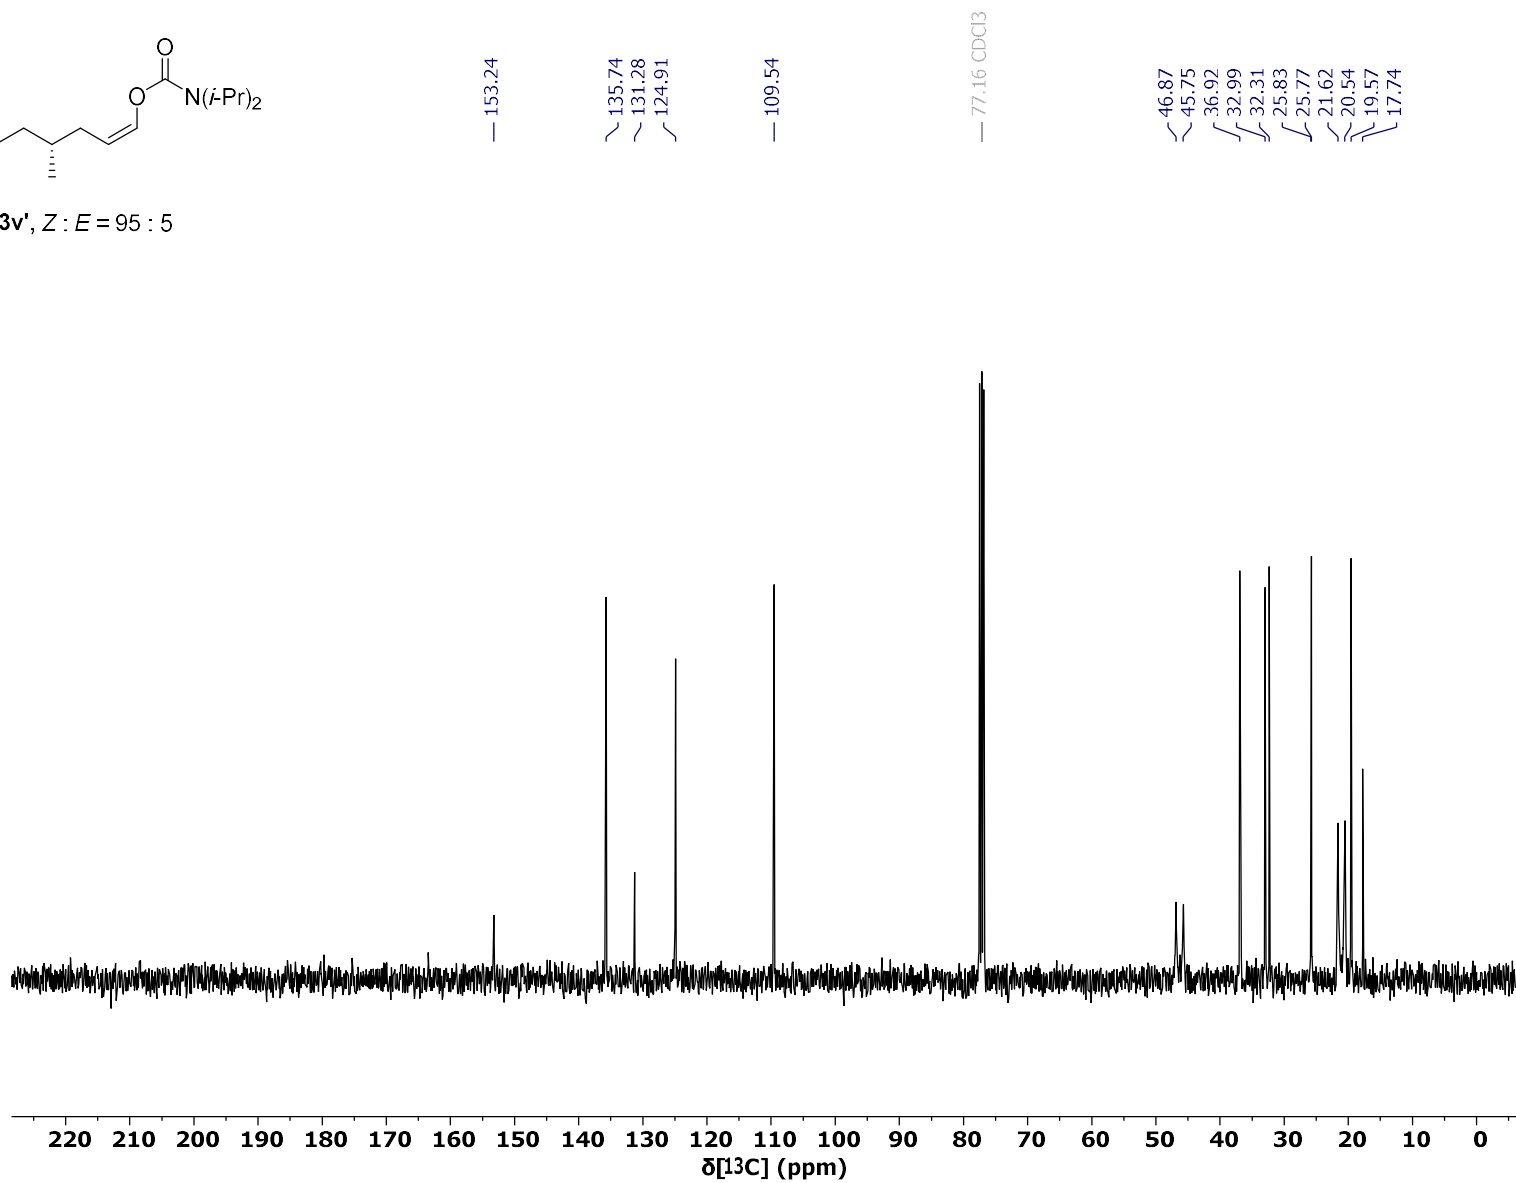

S124

<sup>1</sup>H NMR (400 MHz, CDCl<sub>3</sub>)

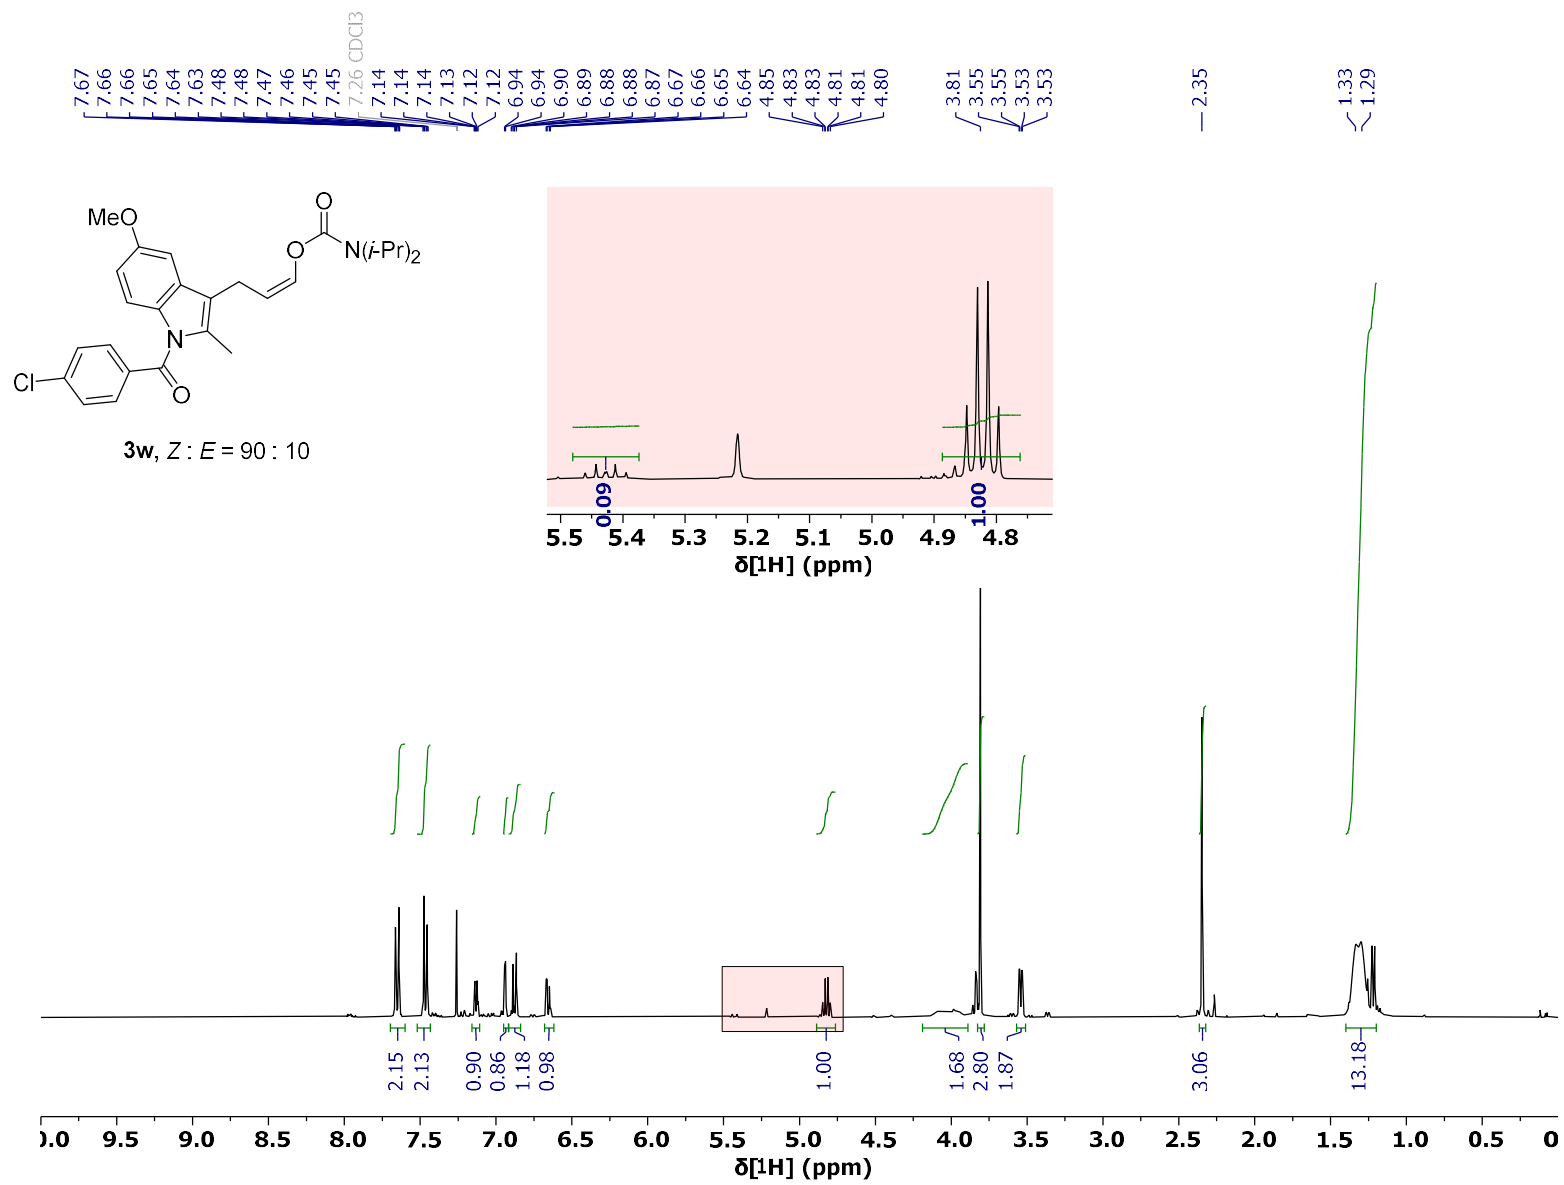

$^{13}\text{C}$  NMR (151 MHz,  $\text{CDCl}_3$ )

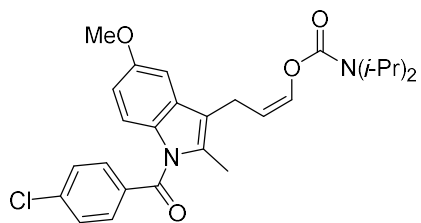

**3w**, Z : E = 90 : 10

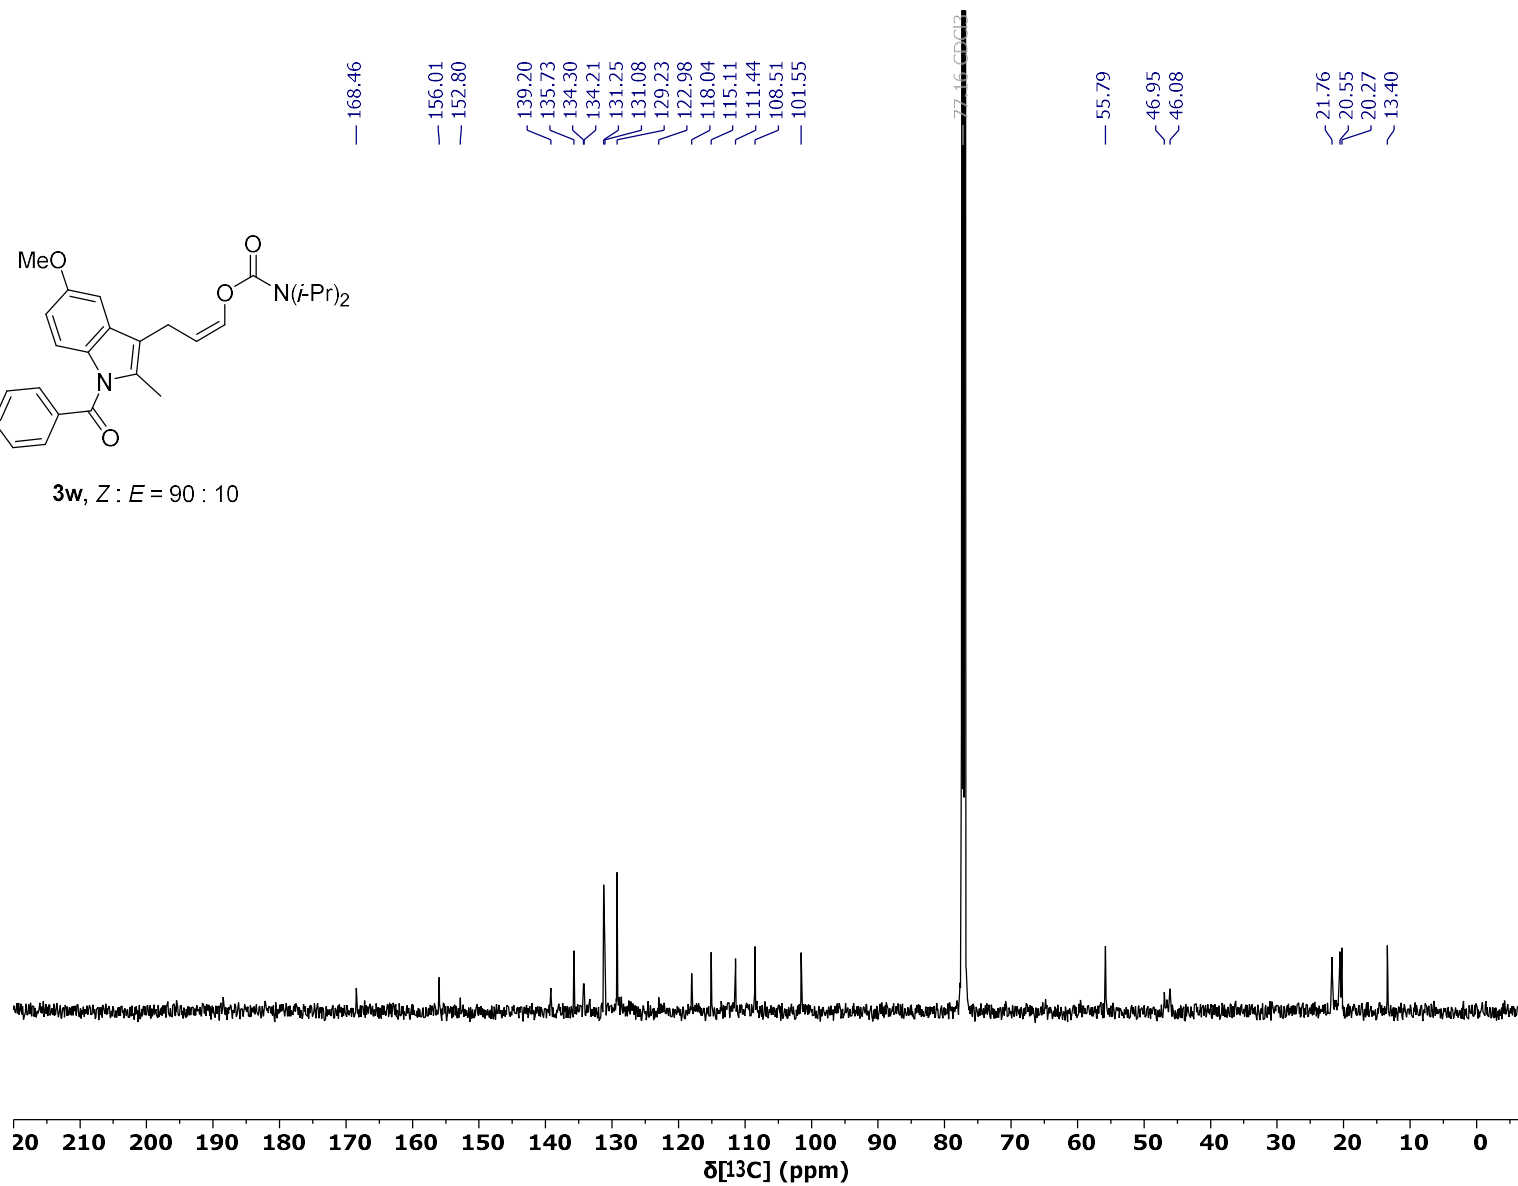

S126

<sup>1</sup>H NMR (400 MHz, CDCl<sub>3</sub>)

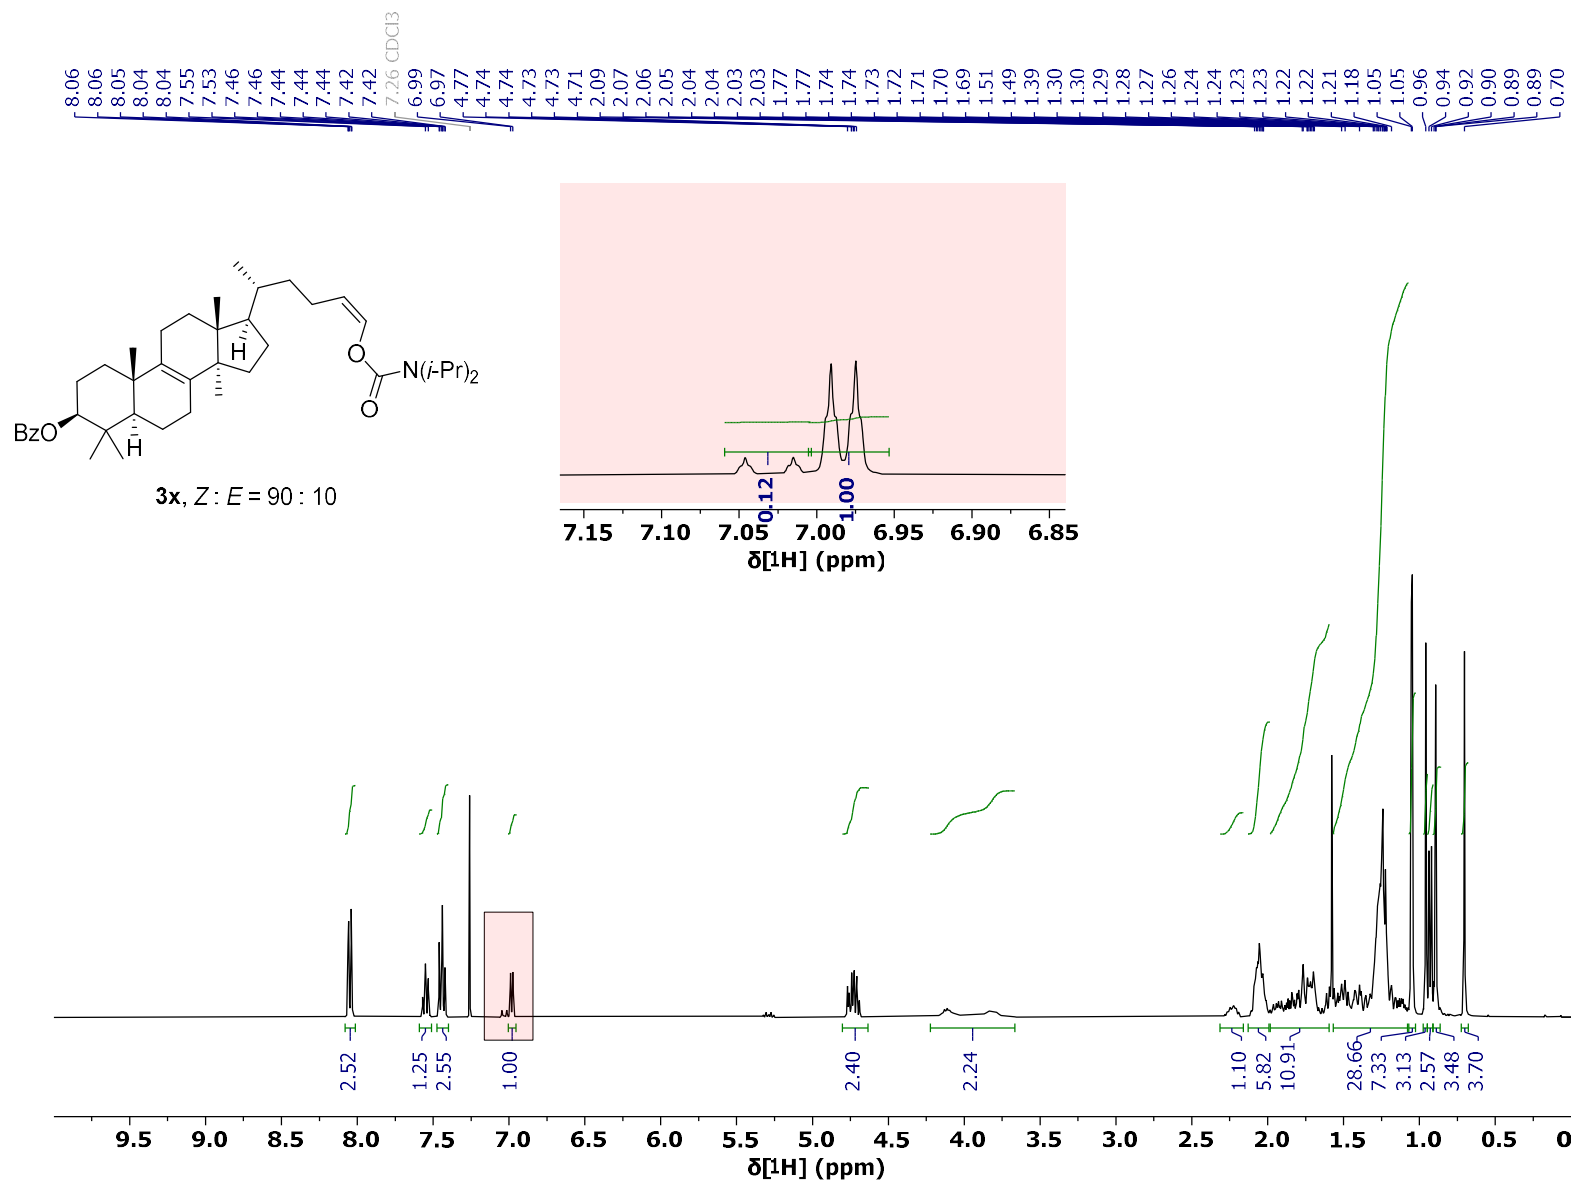

$^{13}\text{C}$  NMR (151 MHz,  $\text{CDCl}_3$ )

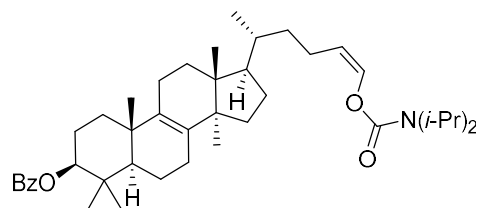

**3x**, Z : E = 90 : 10

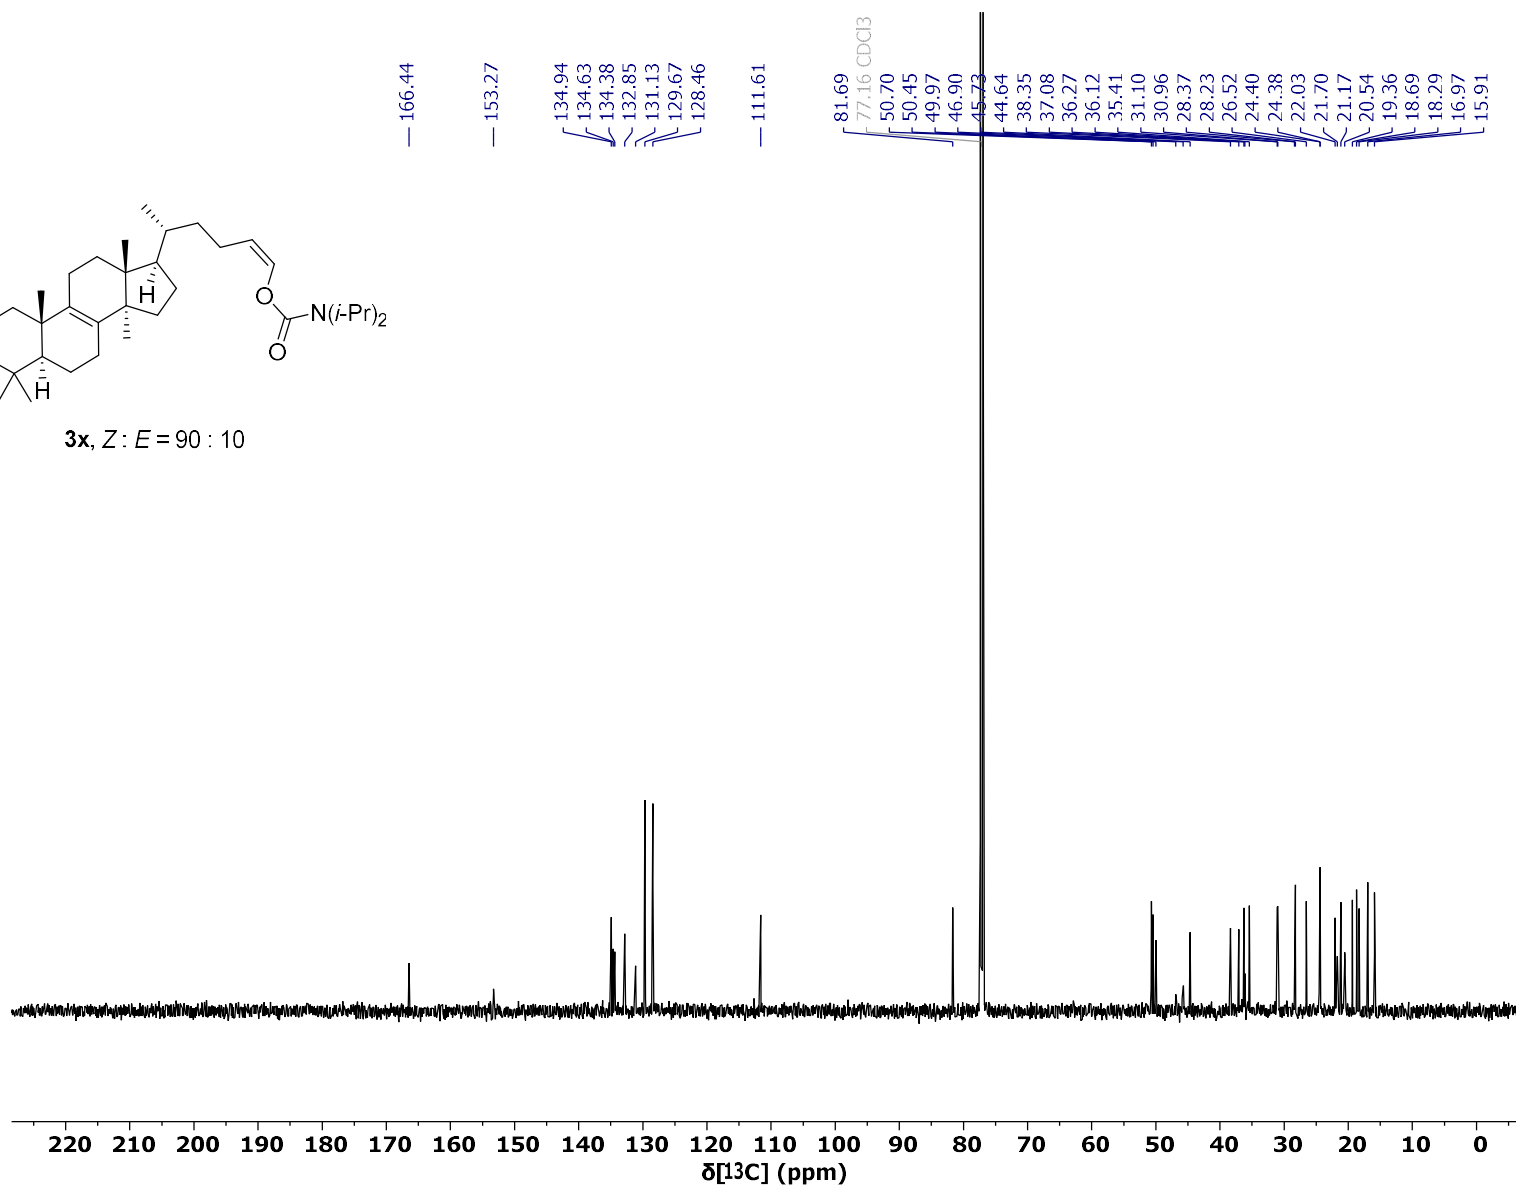

S128



<sup>1</sup>H NMR (400 MHz, CDCl<sub>3</sub>)

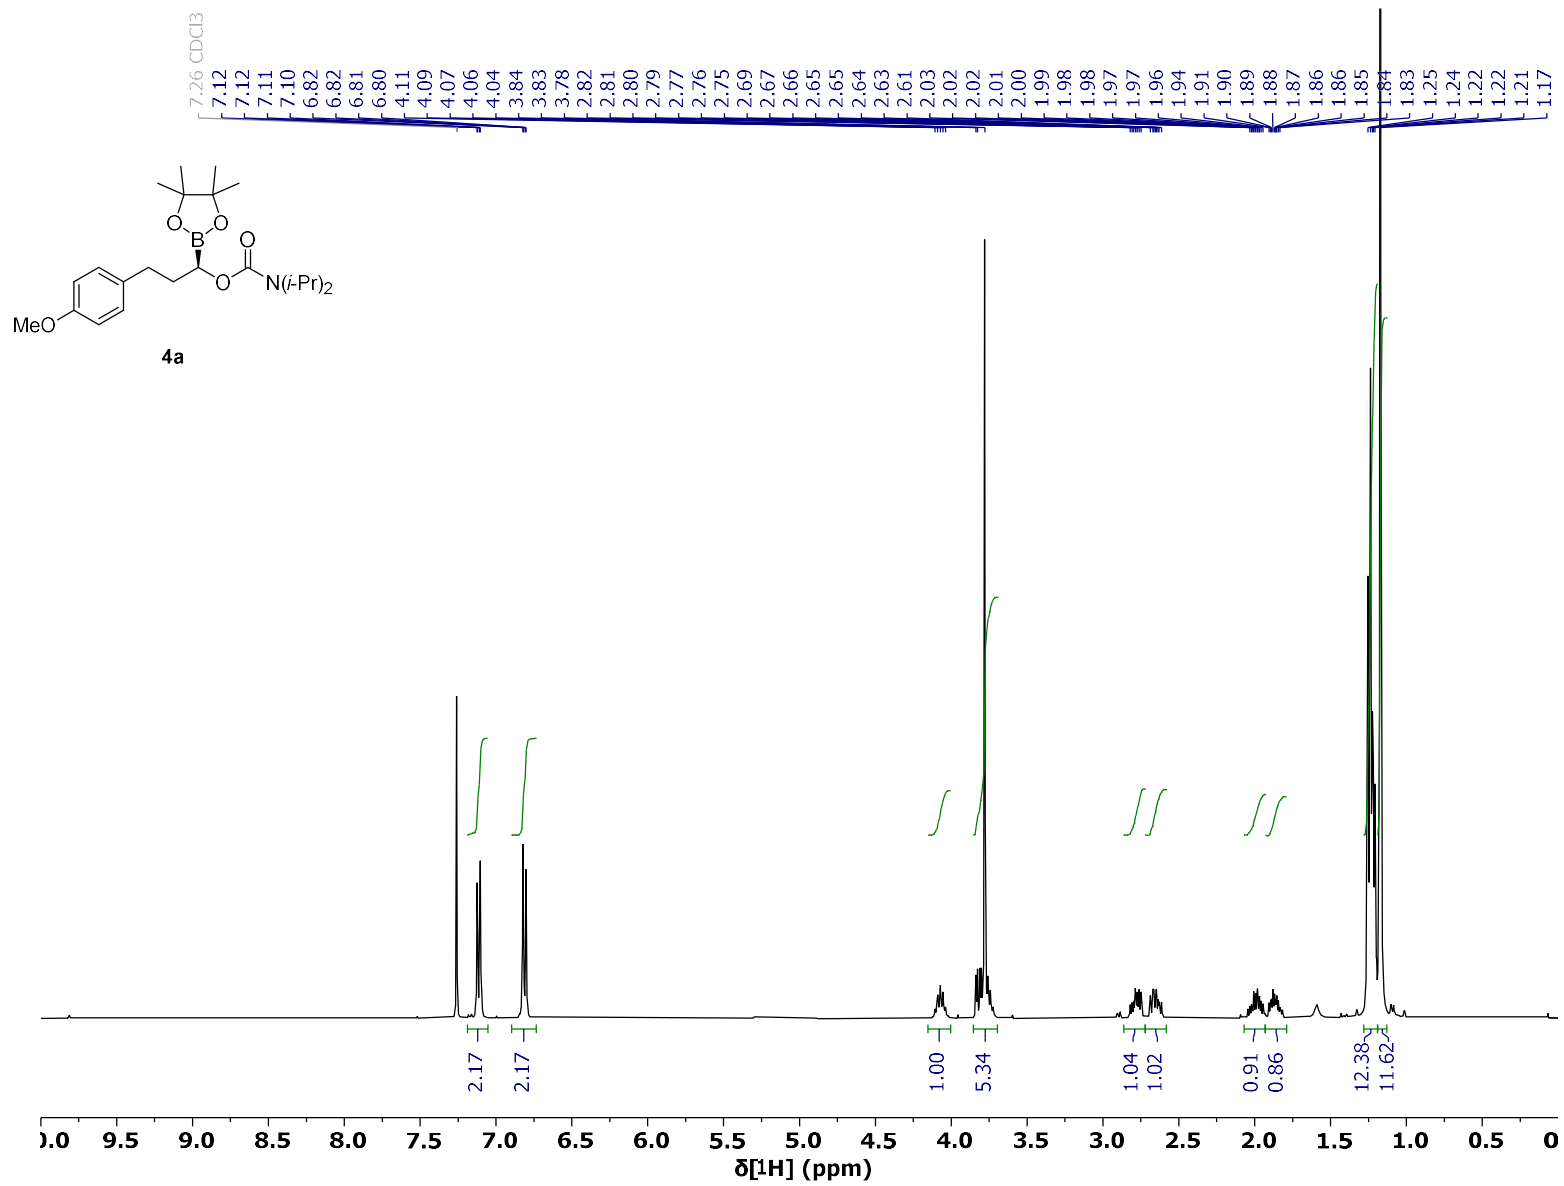

<sup>13</sup>C NMR (101 MHz, CDCl<sub>3</sub>)

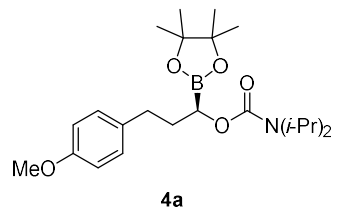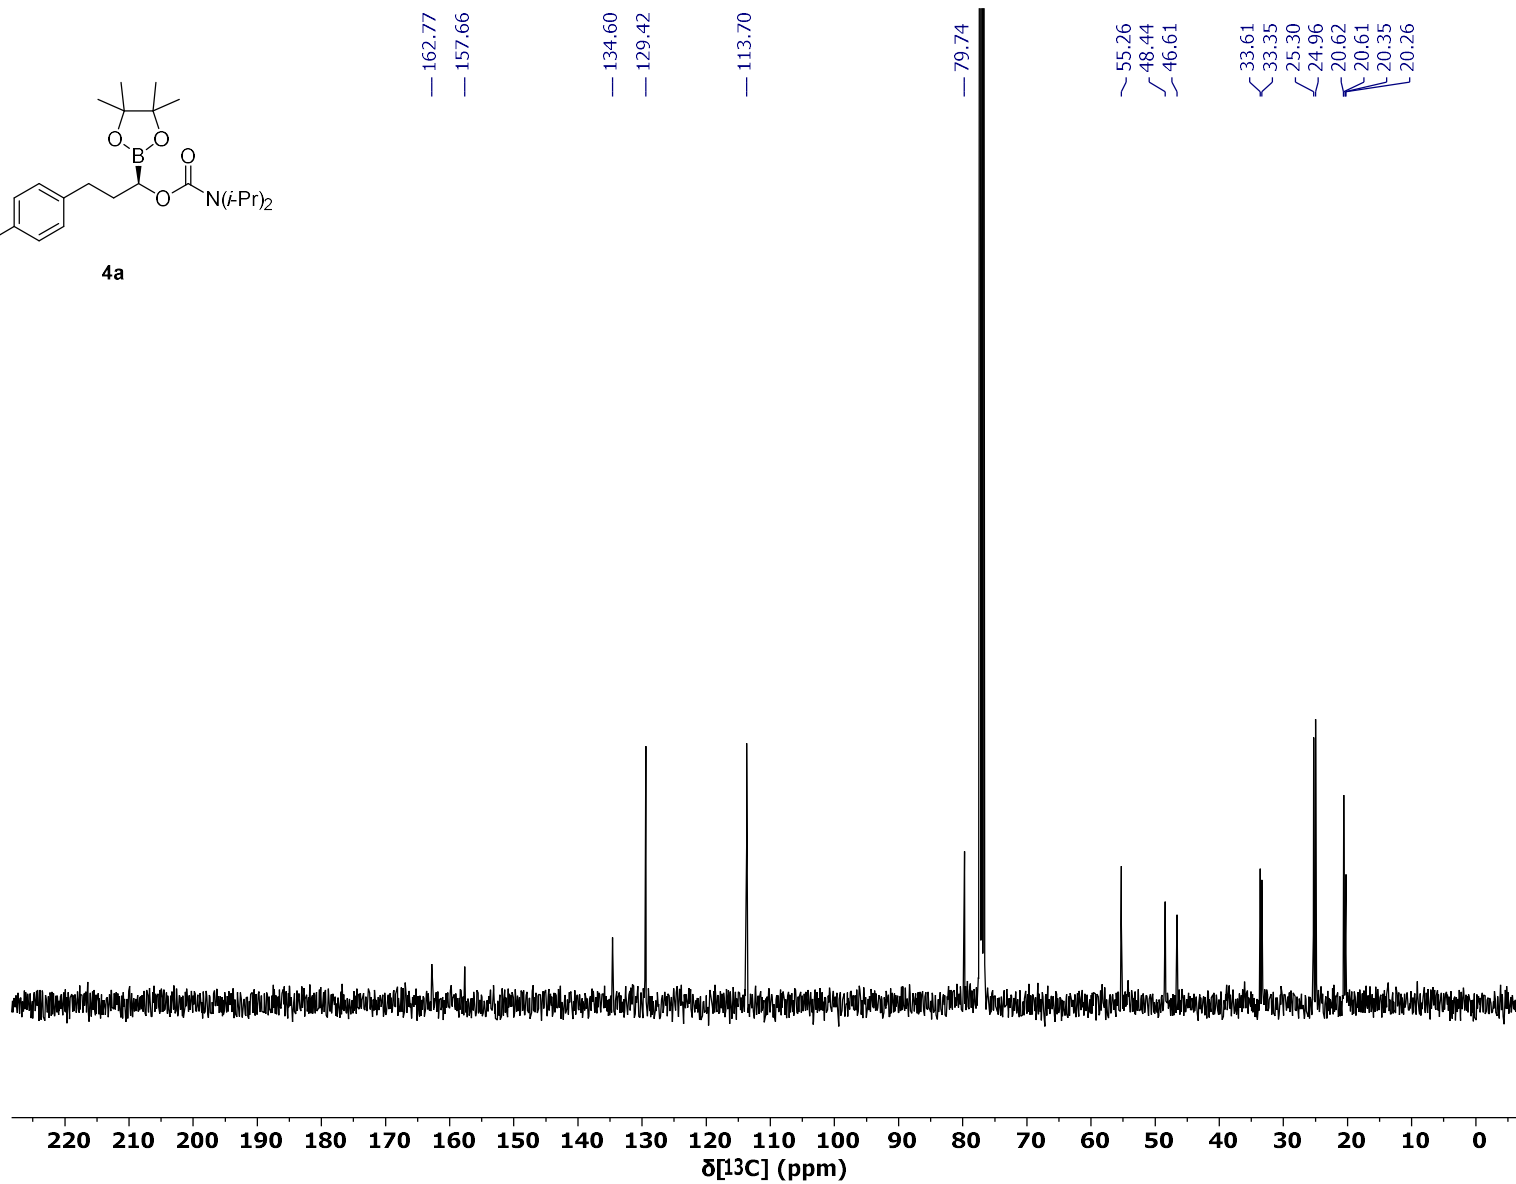

S130

$^{11}\text{B}$  NMR (128 MHz,  $\text{CDCl}_3$ )

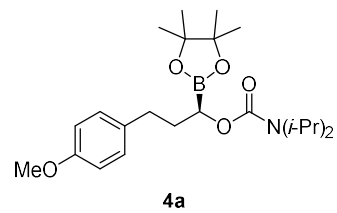

— 12.86

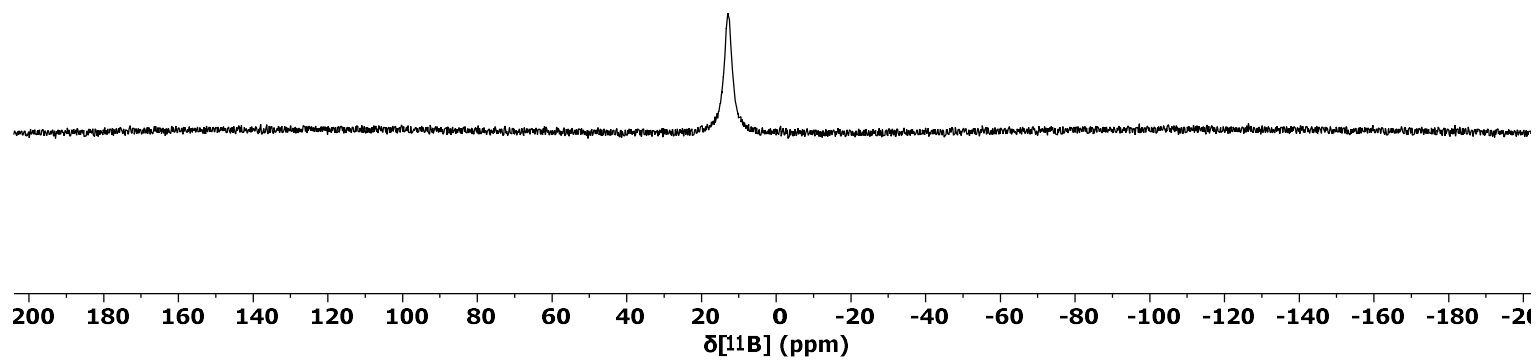

S131

$^1\text{H}$  NMR (400 MHz,  $\text{CDCl}_3$ )

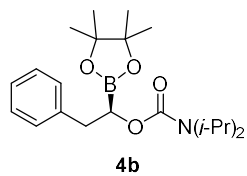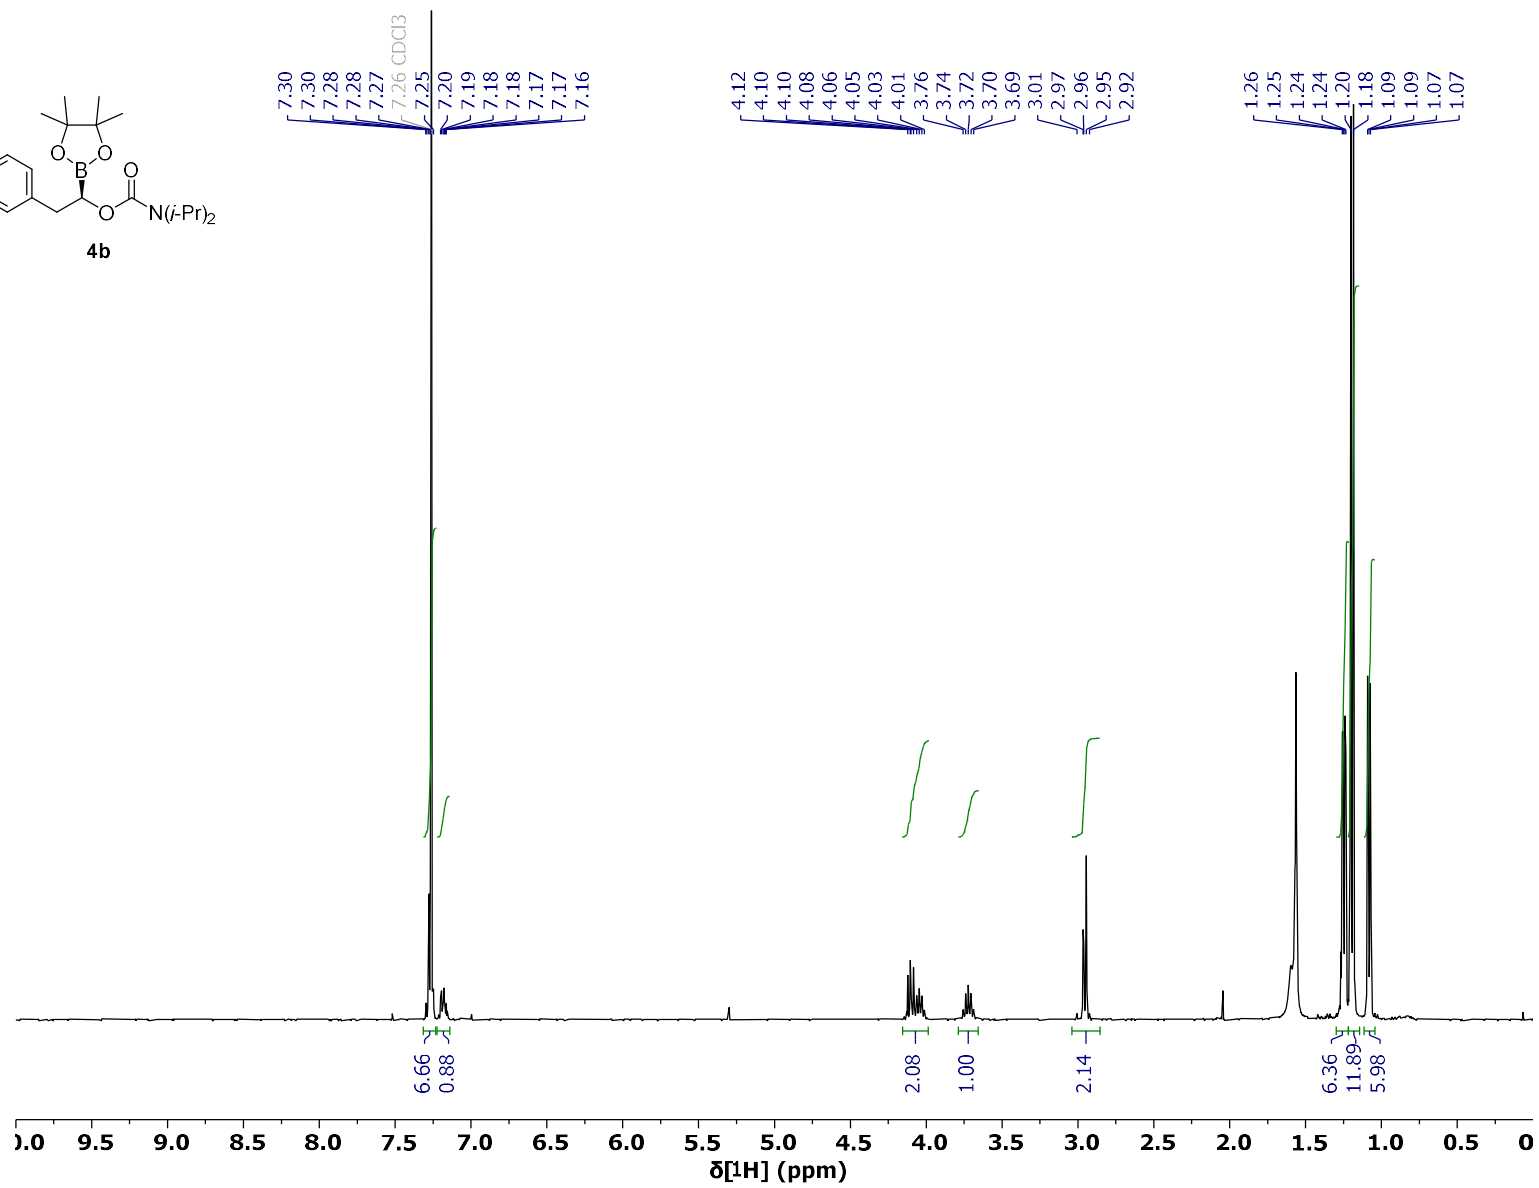

S132

$^{13}\text{C}$  NMR (151 MHz,  $\text{CDCl}_3$ )

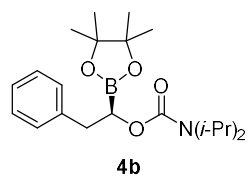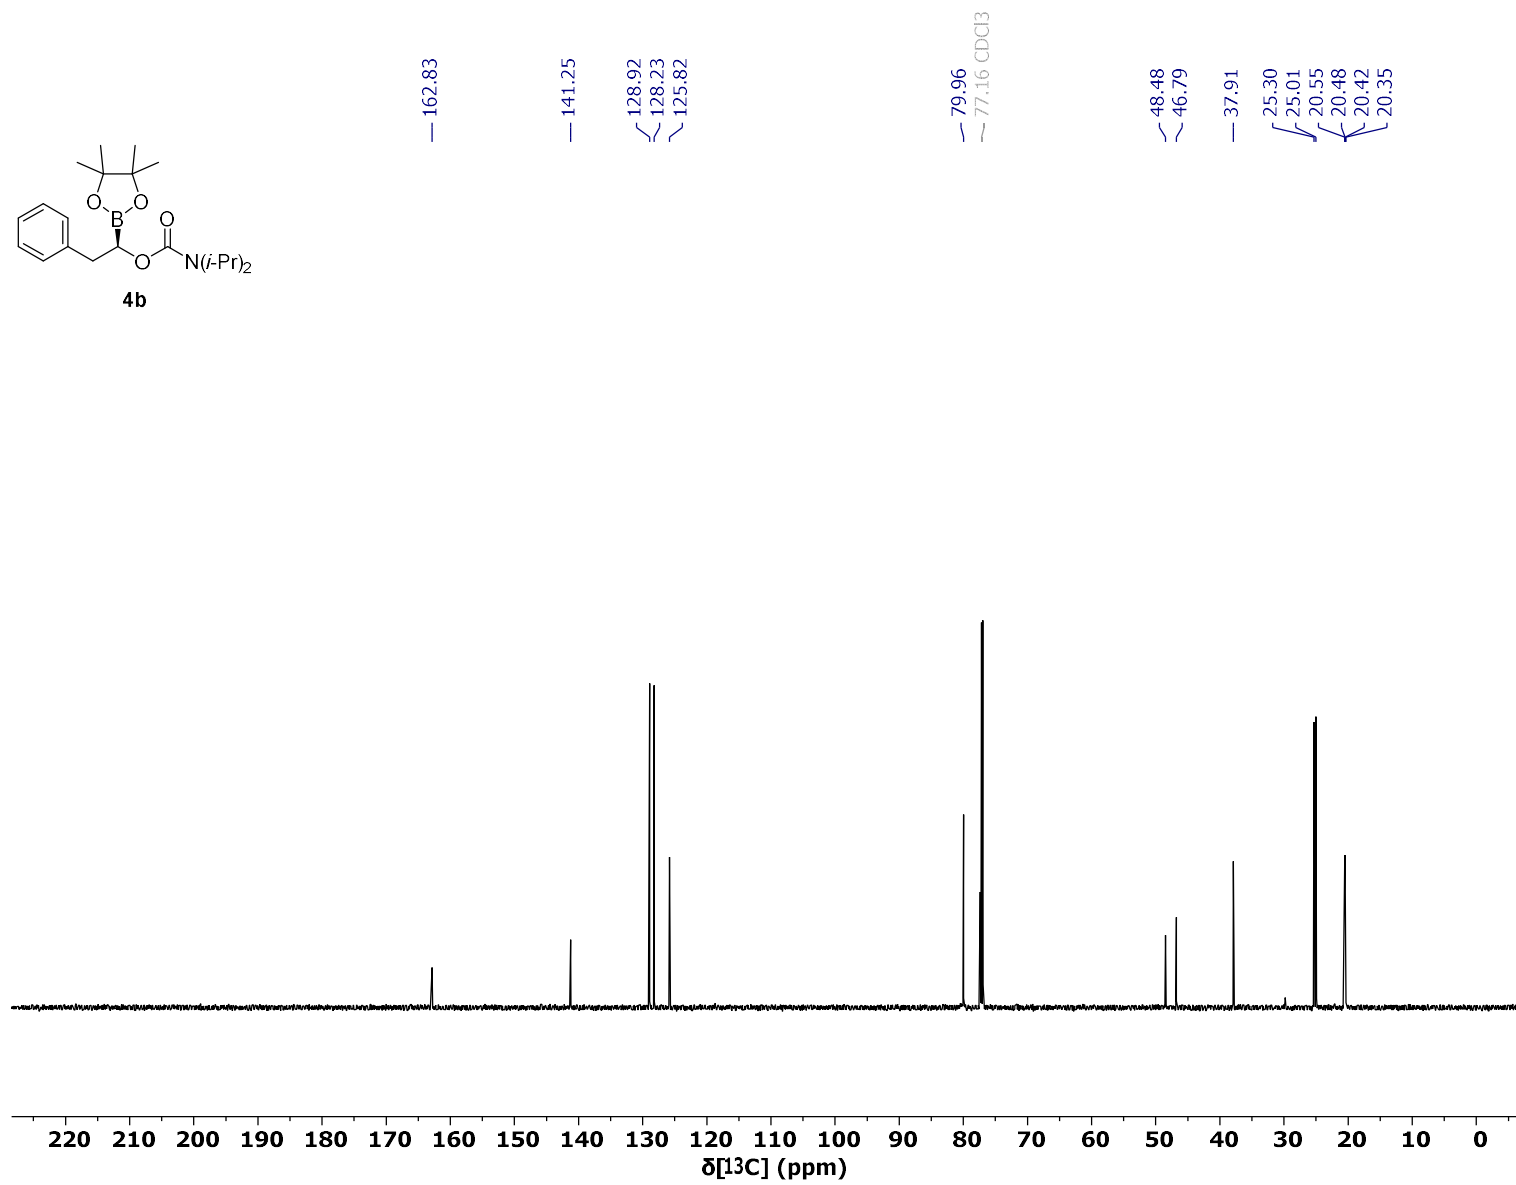

S133

$^{11}\text{B}$  NMR (128 MHz,  $\text{CDCl}_3$ )

— 12.50

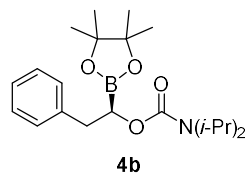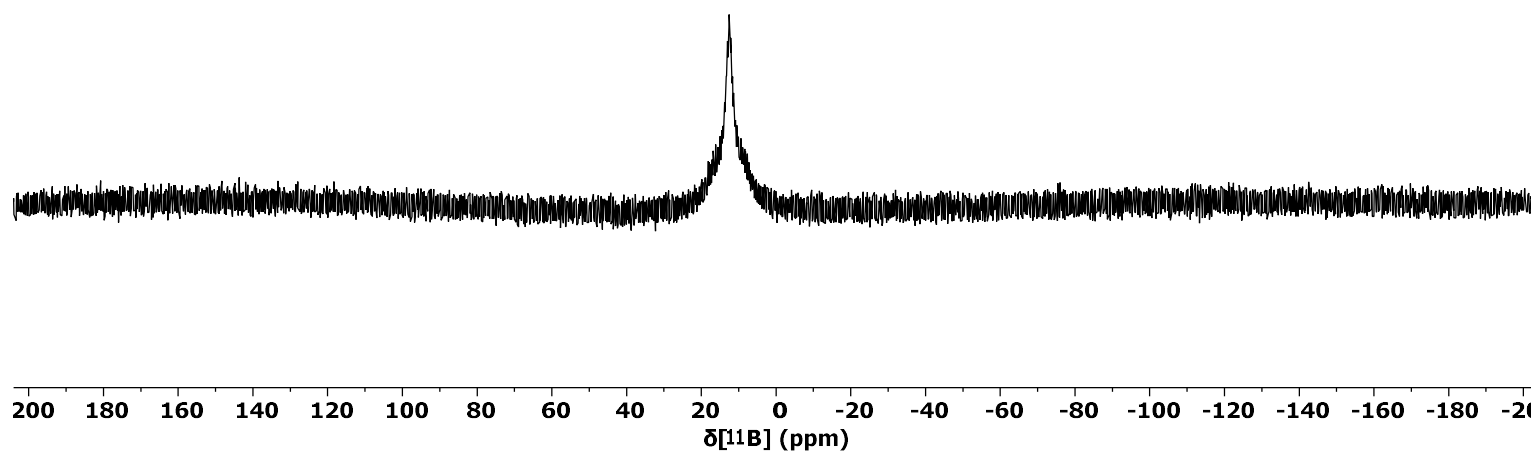

S134

$^1\text{H}$  NMR (400 MHz,  $\text{CDCl}_3$ )

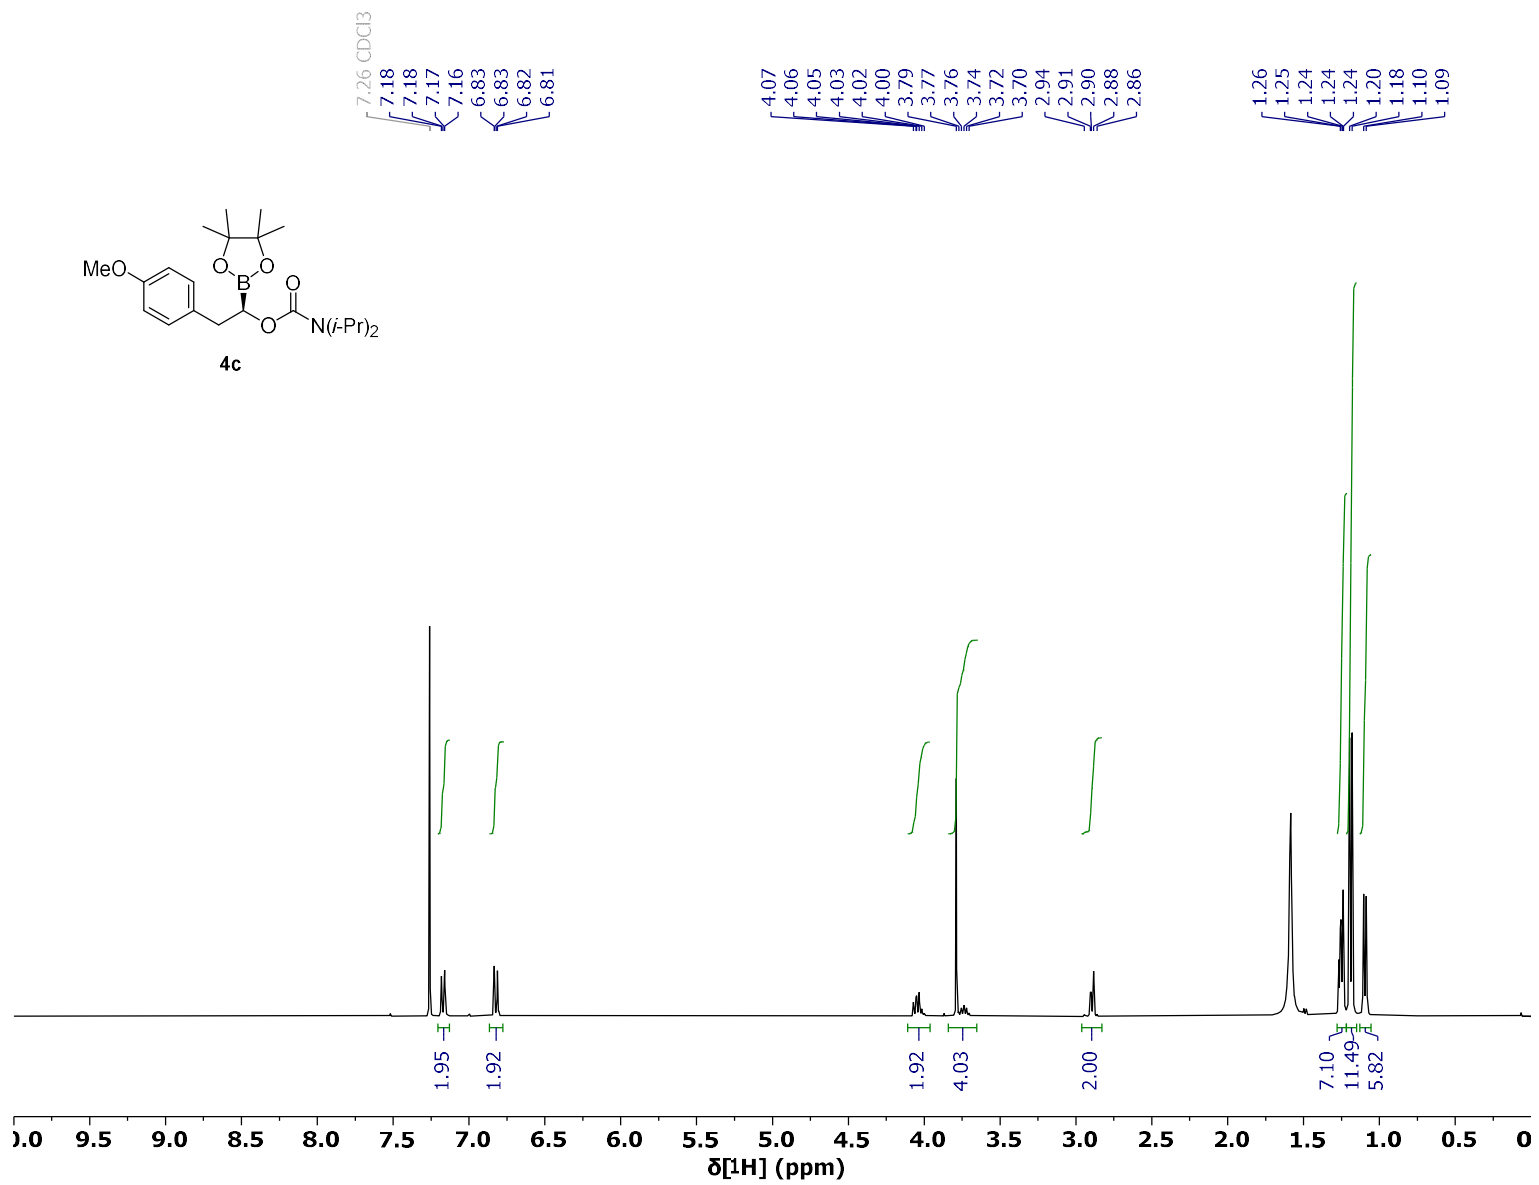

S135

$^{13}\text{C}$  NMR (151 MHz,  $\text{CDCl}_3$ )

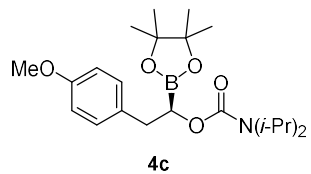

— 162.85  
— 157.82

— 133.32  
— 129.82

— 113.65

— 79.96  
— 77.16  $\text{CDCl}_3$

— 55.35  
— 48.45  
— 46.82

— 36.99  
— 25.31  
— 25.02  
— 20.58  
— 20.52  
— 20.44  
— 20.37

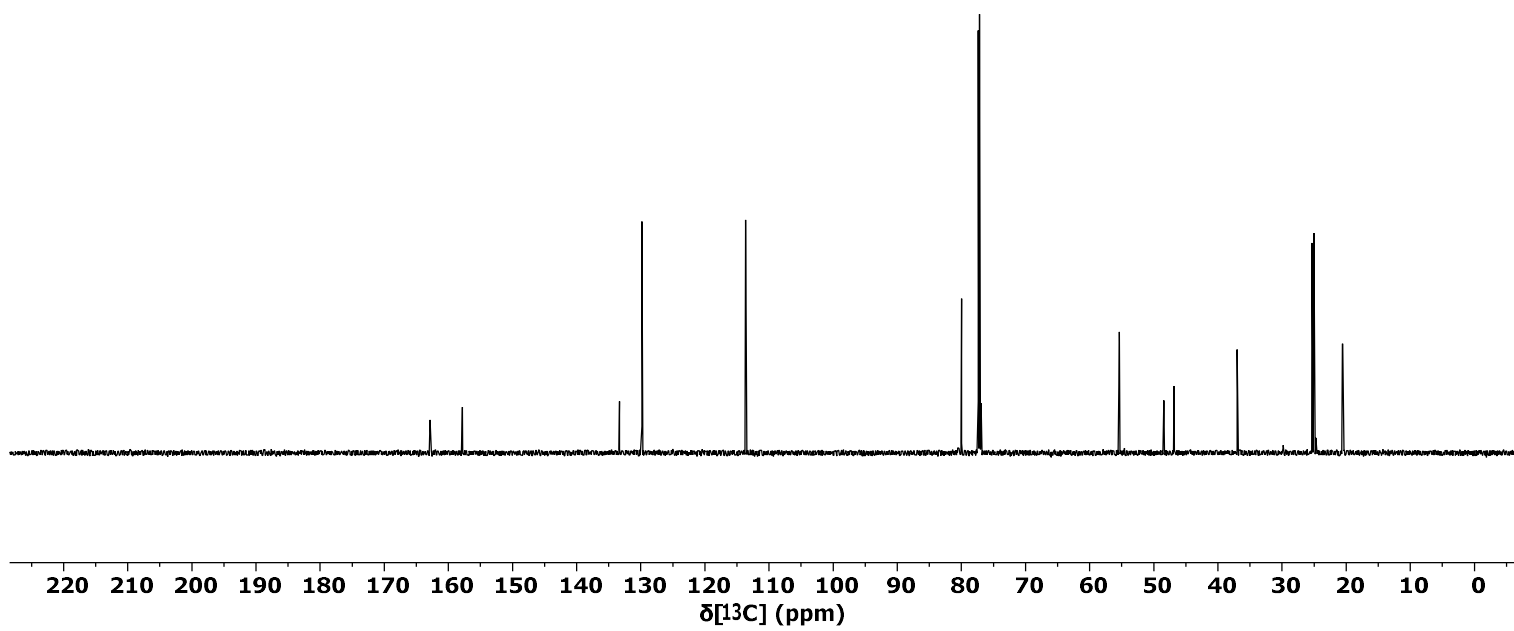

S136



$^{11}\text{B}$  NMR (128 MHz,  $\text{CDCl}_3$ )

— 12.66

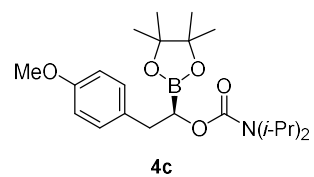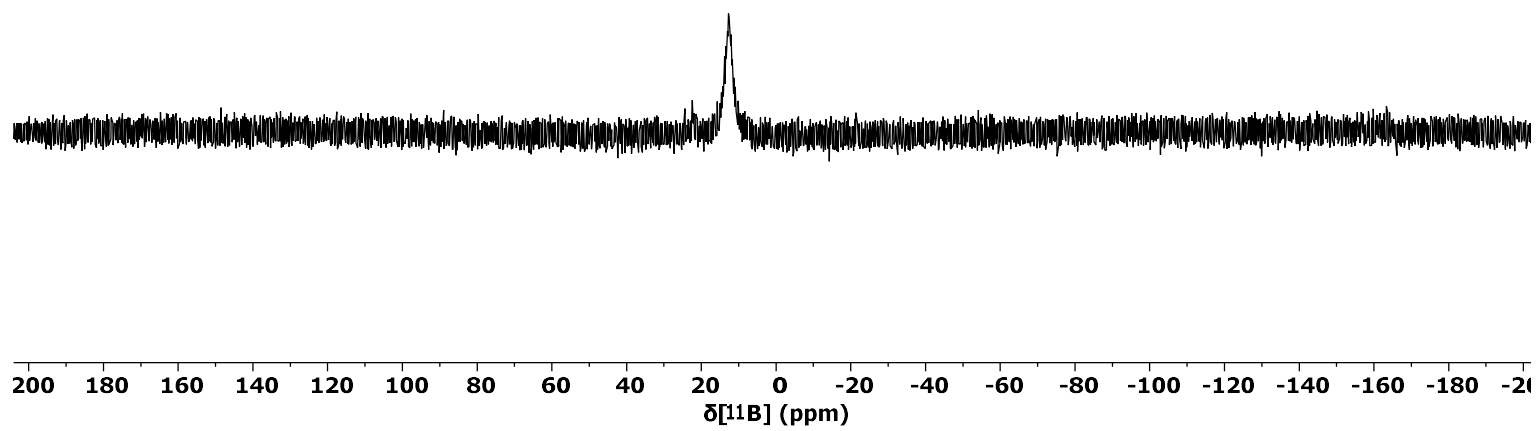

S137

$^1\text{H}$  NMR (400 MHz,  $\text{CDCl}_3$ )

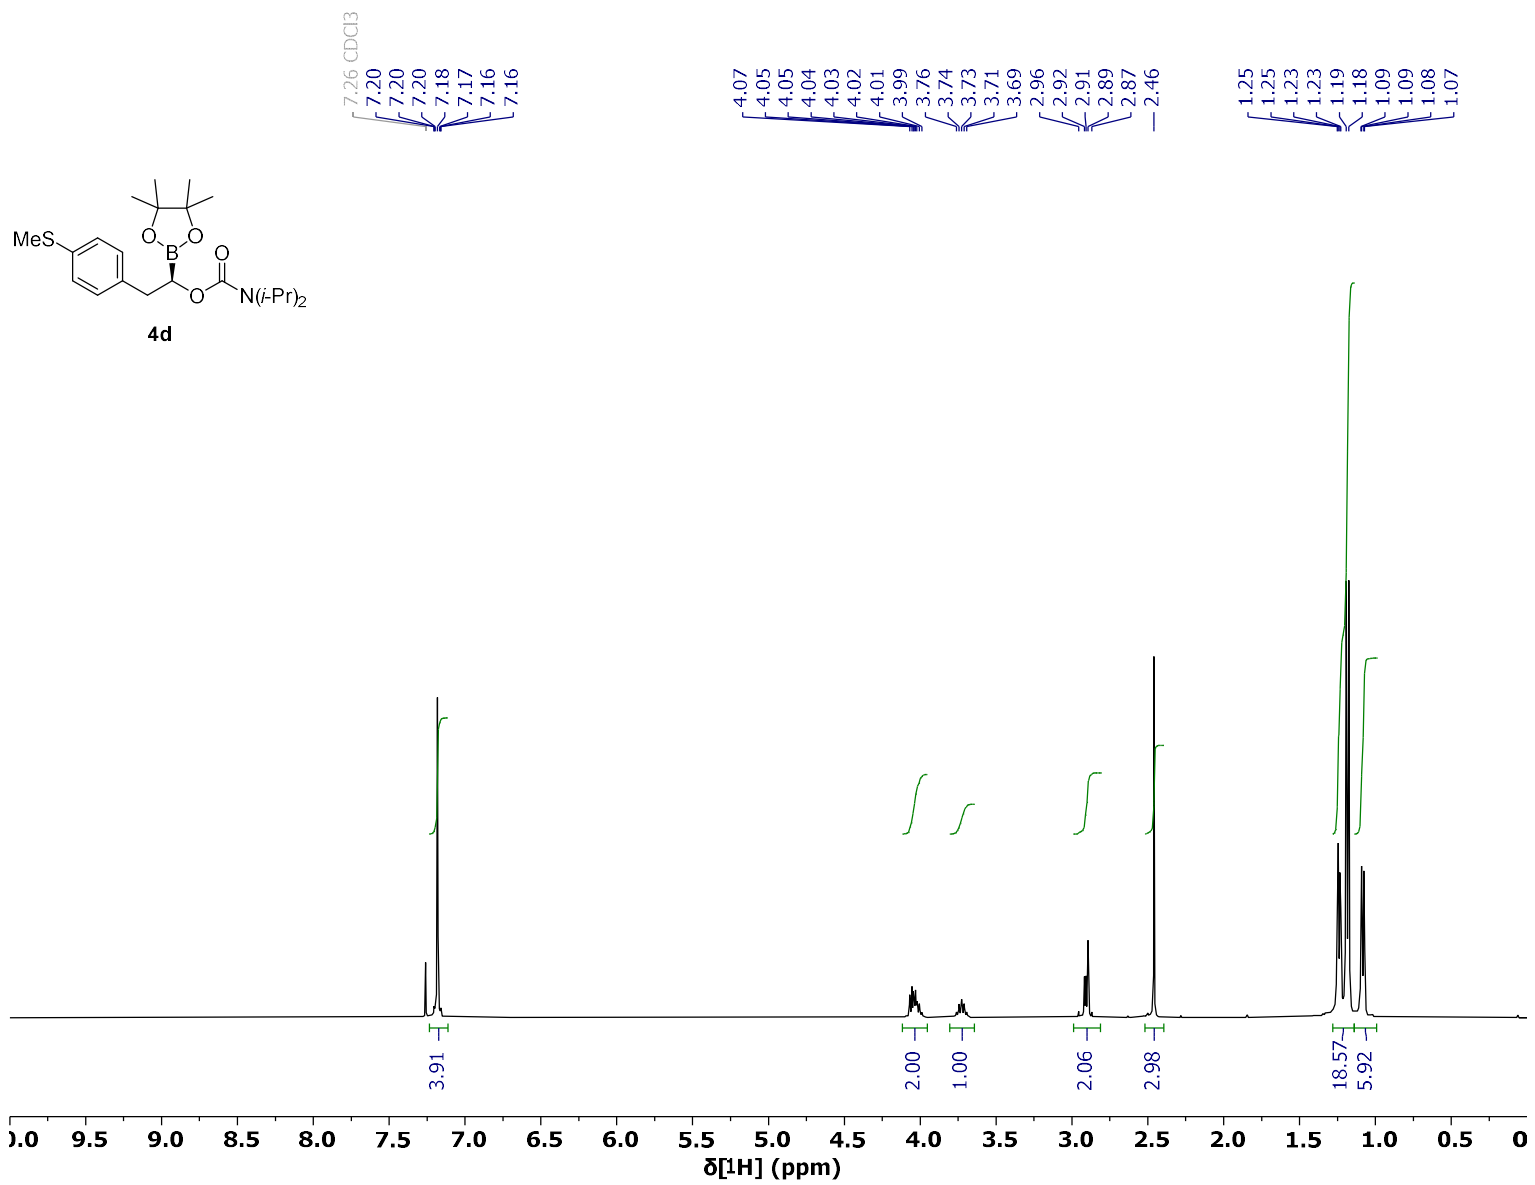

S138

$^{13}\text{C}$  NMR (151 MHz,  $\text{CDCl}_3$ )

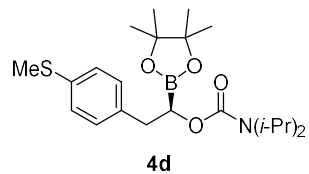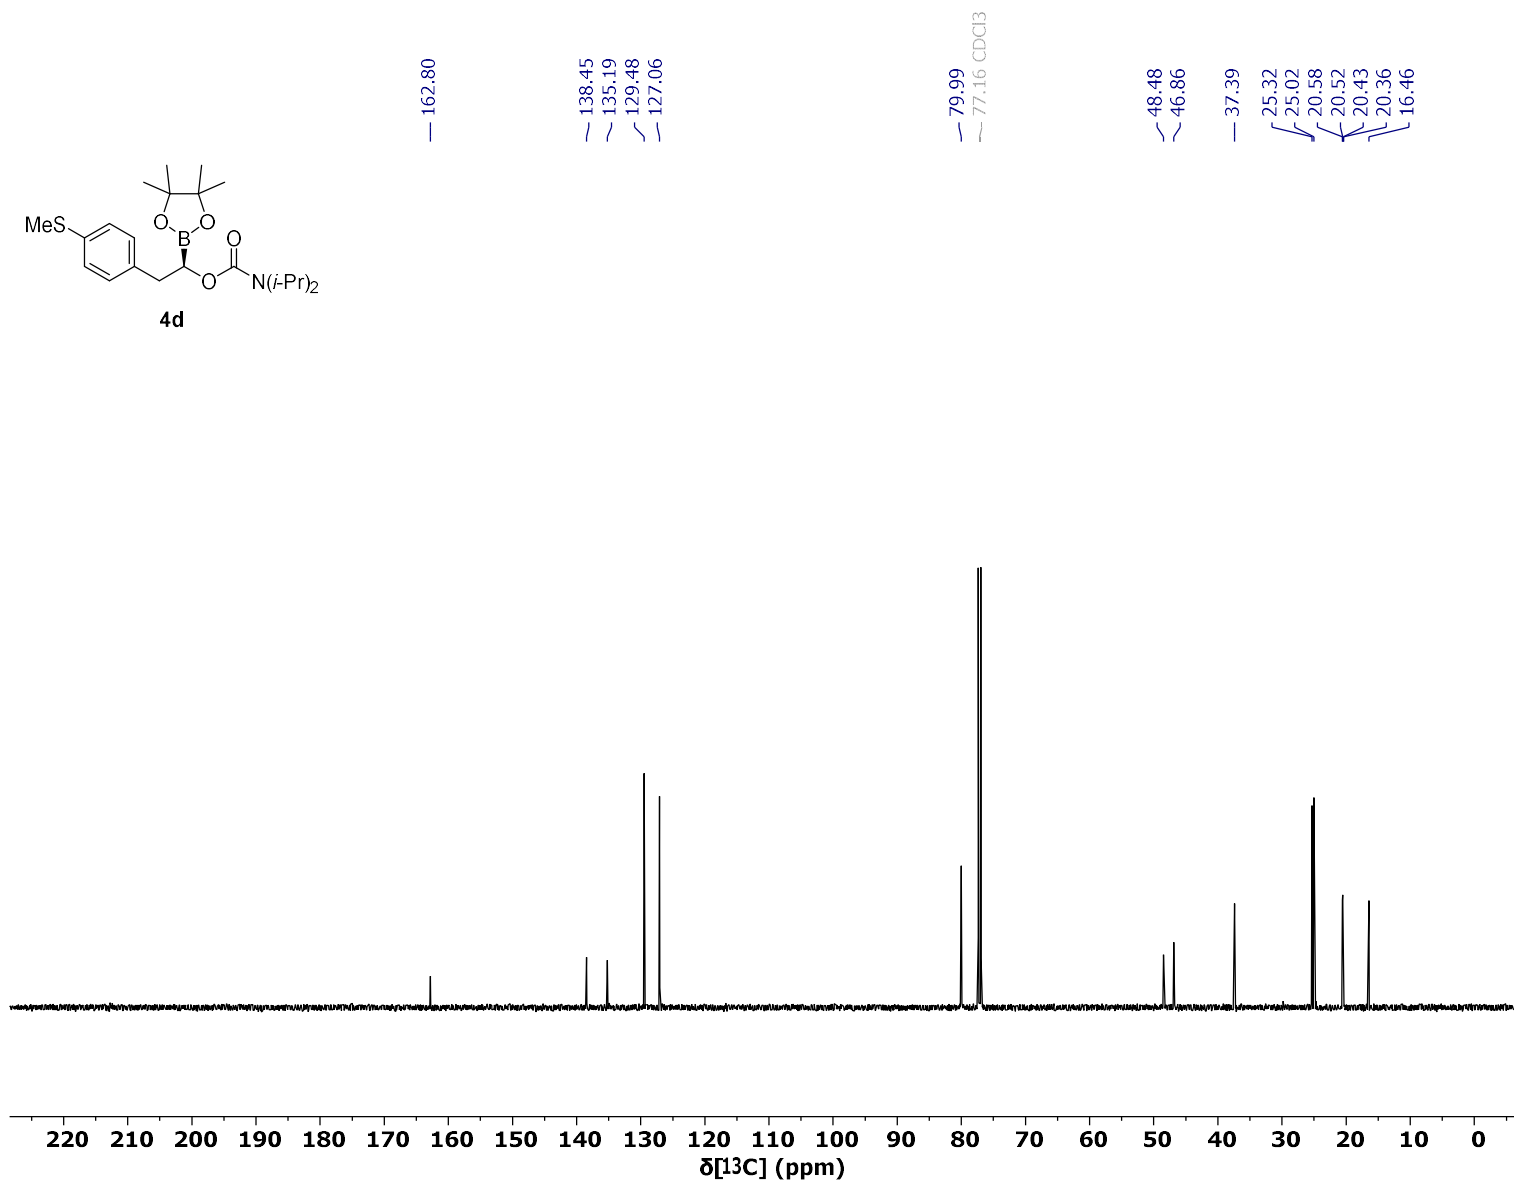

$^{11}\text{B}$  NMR (128 MHz,  $\text{CDCl}_3$ )

— 12.54

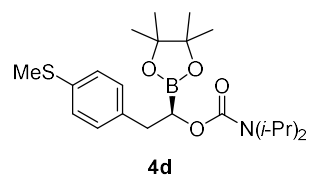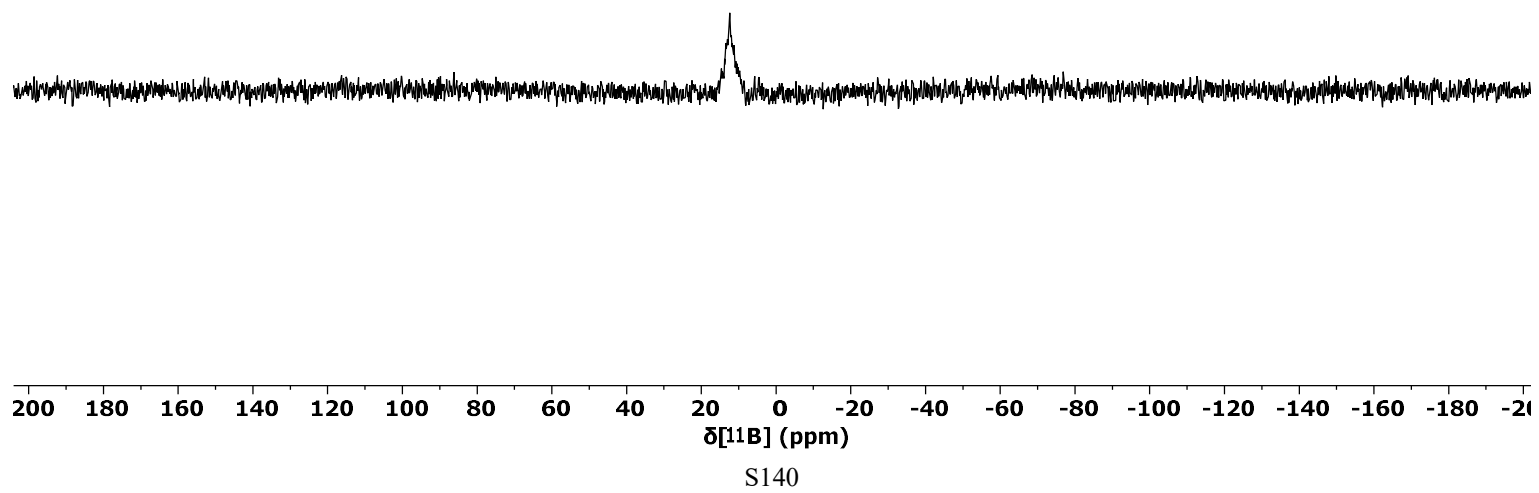

<sup>1</sup>H NMR (400 MHz, CDCl<sub>3</sub>)

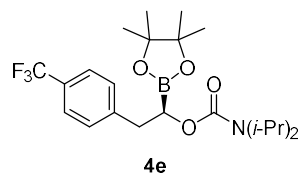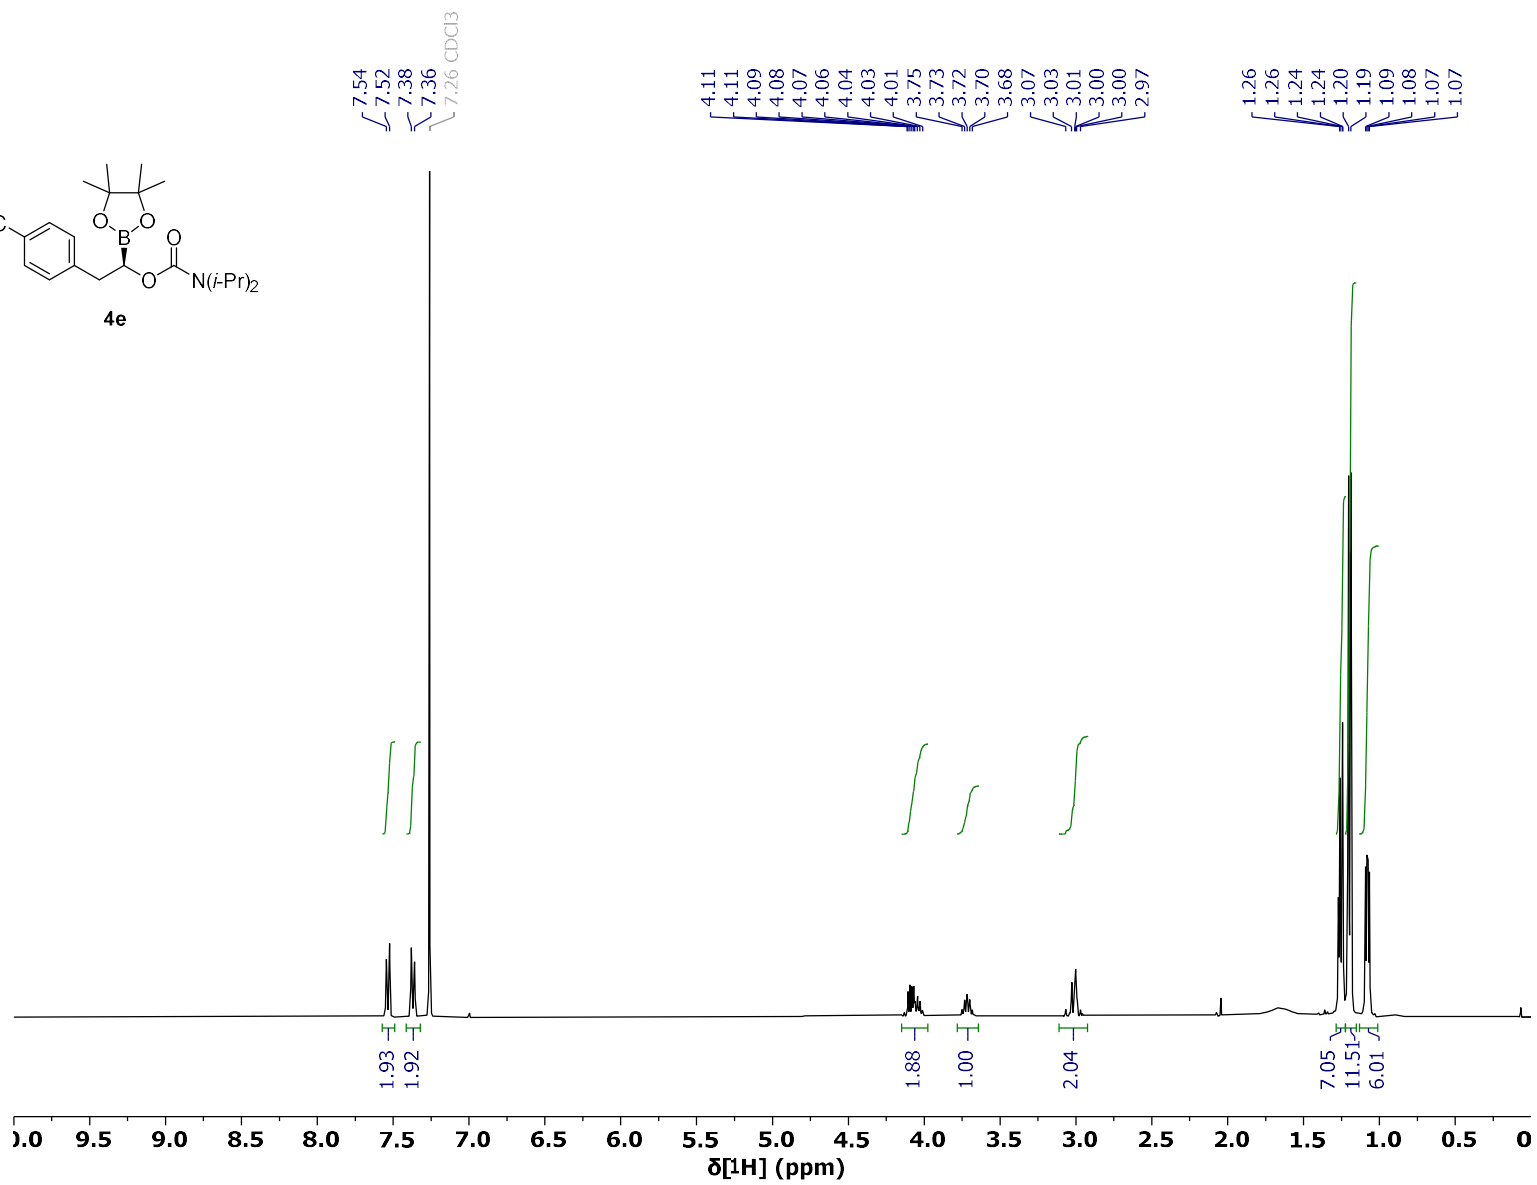

S141

$^{13}\text{C}$  NMR (151 MHz,  $\text{CDCl}_3$ )

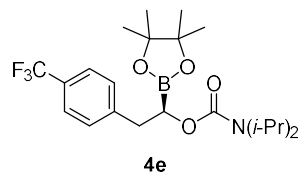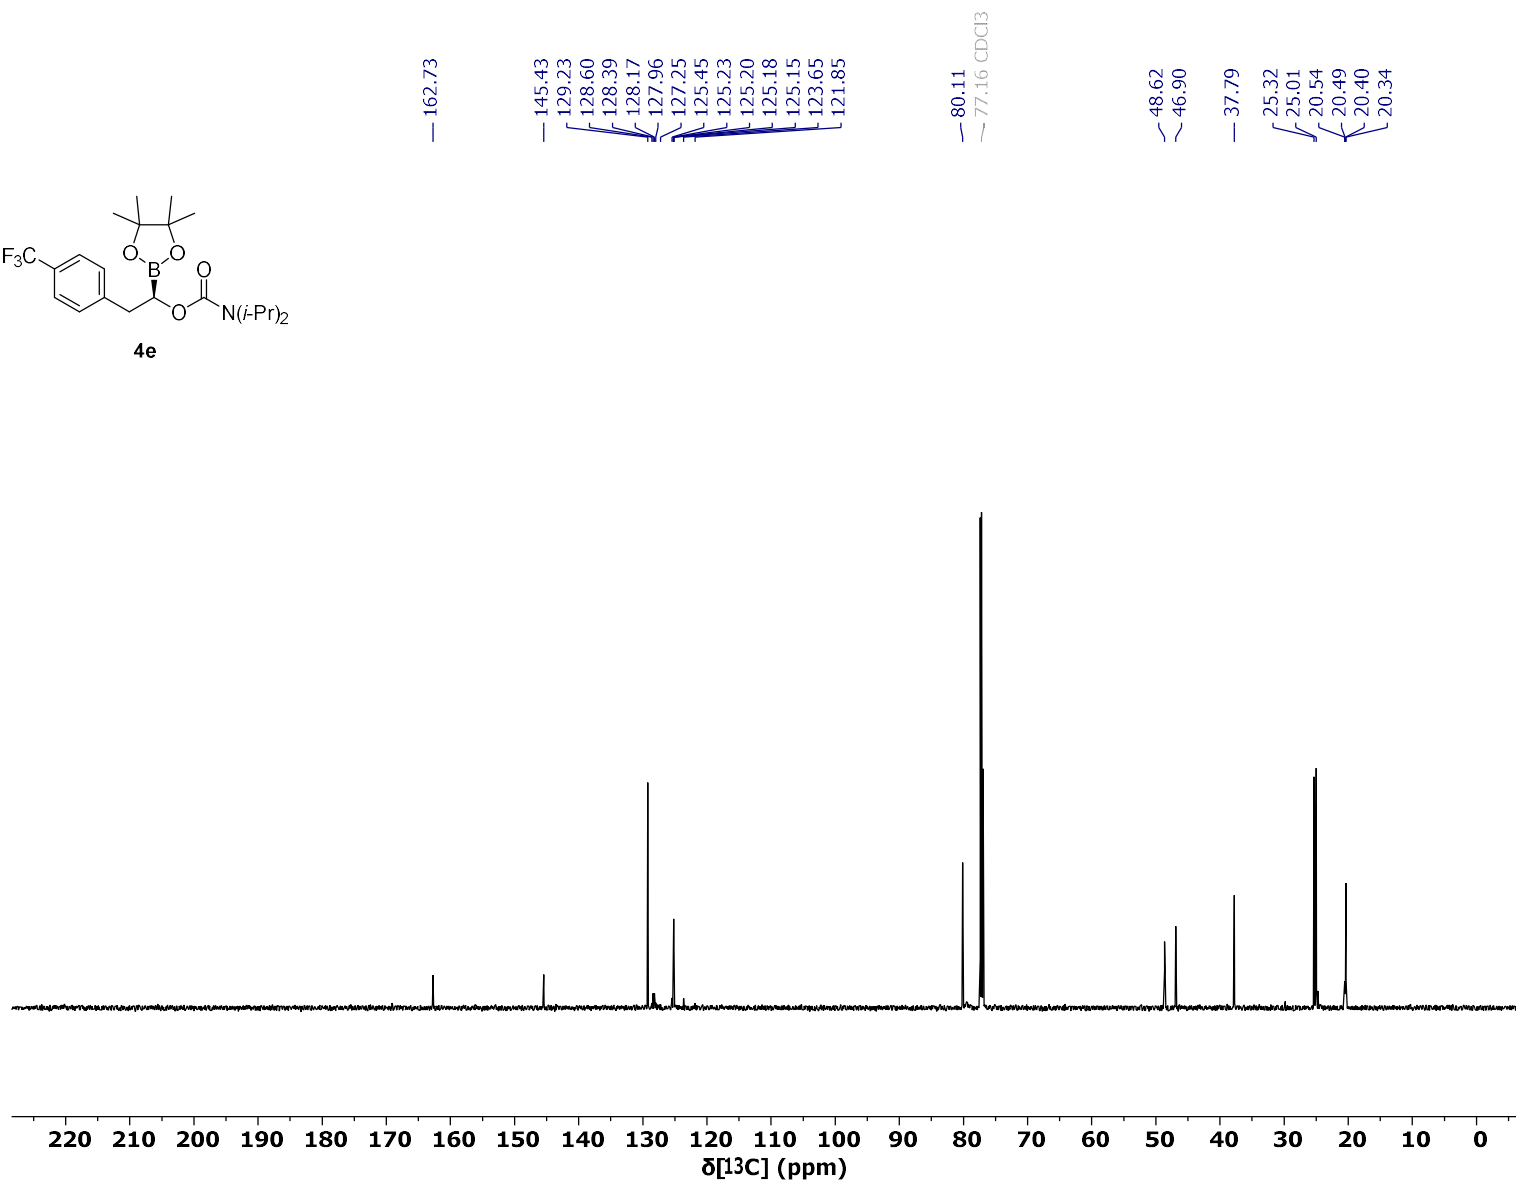

S142

$^{11}\text{B}$  NMR (128 MHz,  $\text{CDCl}_3$ )

— 12.58

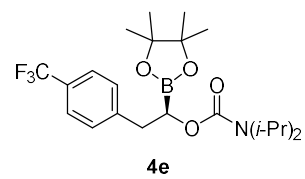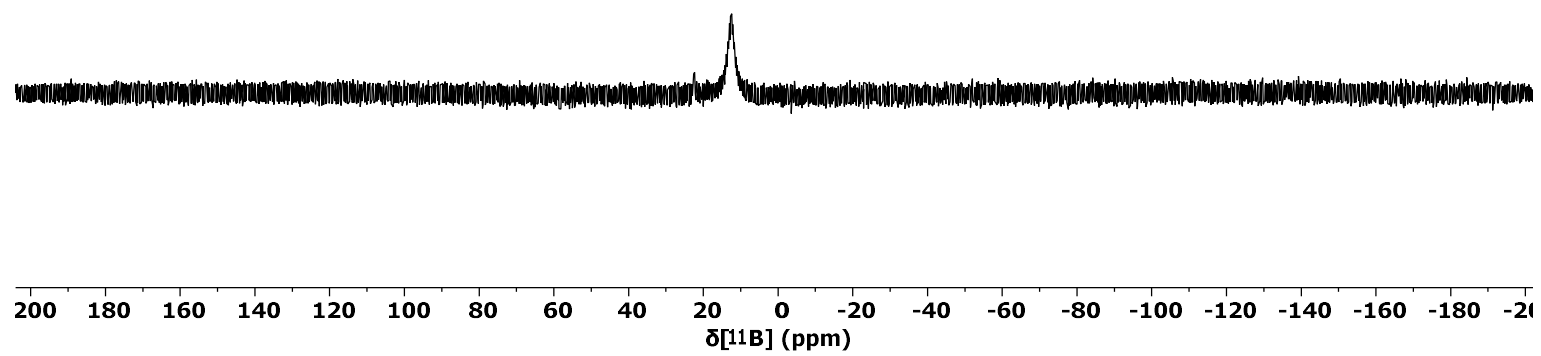

S143

$^{19}\text{F}$  NMR (376 MHz,  $\text{CDCl}_3$ )

-62.26

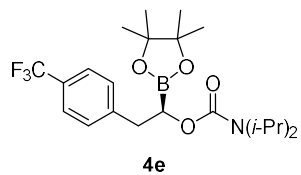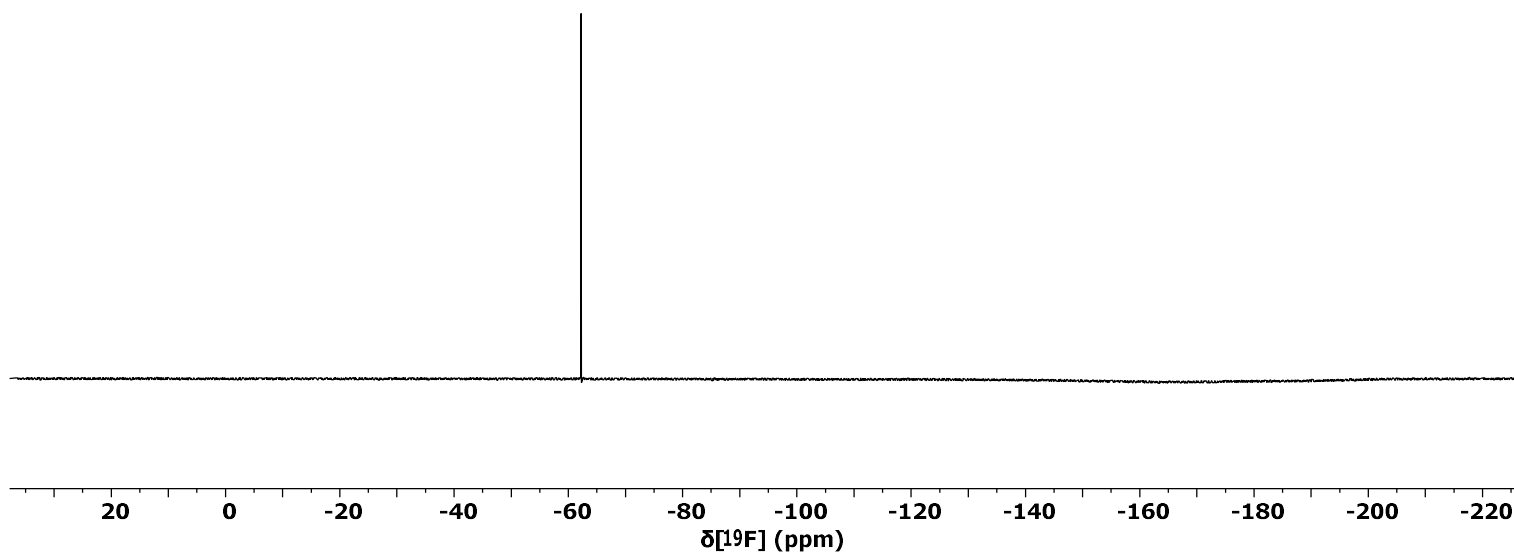

S144



$^1\text{H}$  NMR (400 MHz,  $\text{CDCl}_3$ )

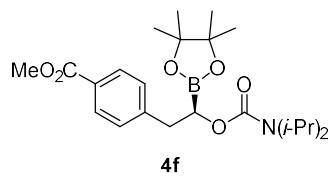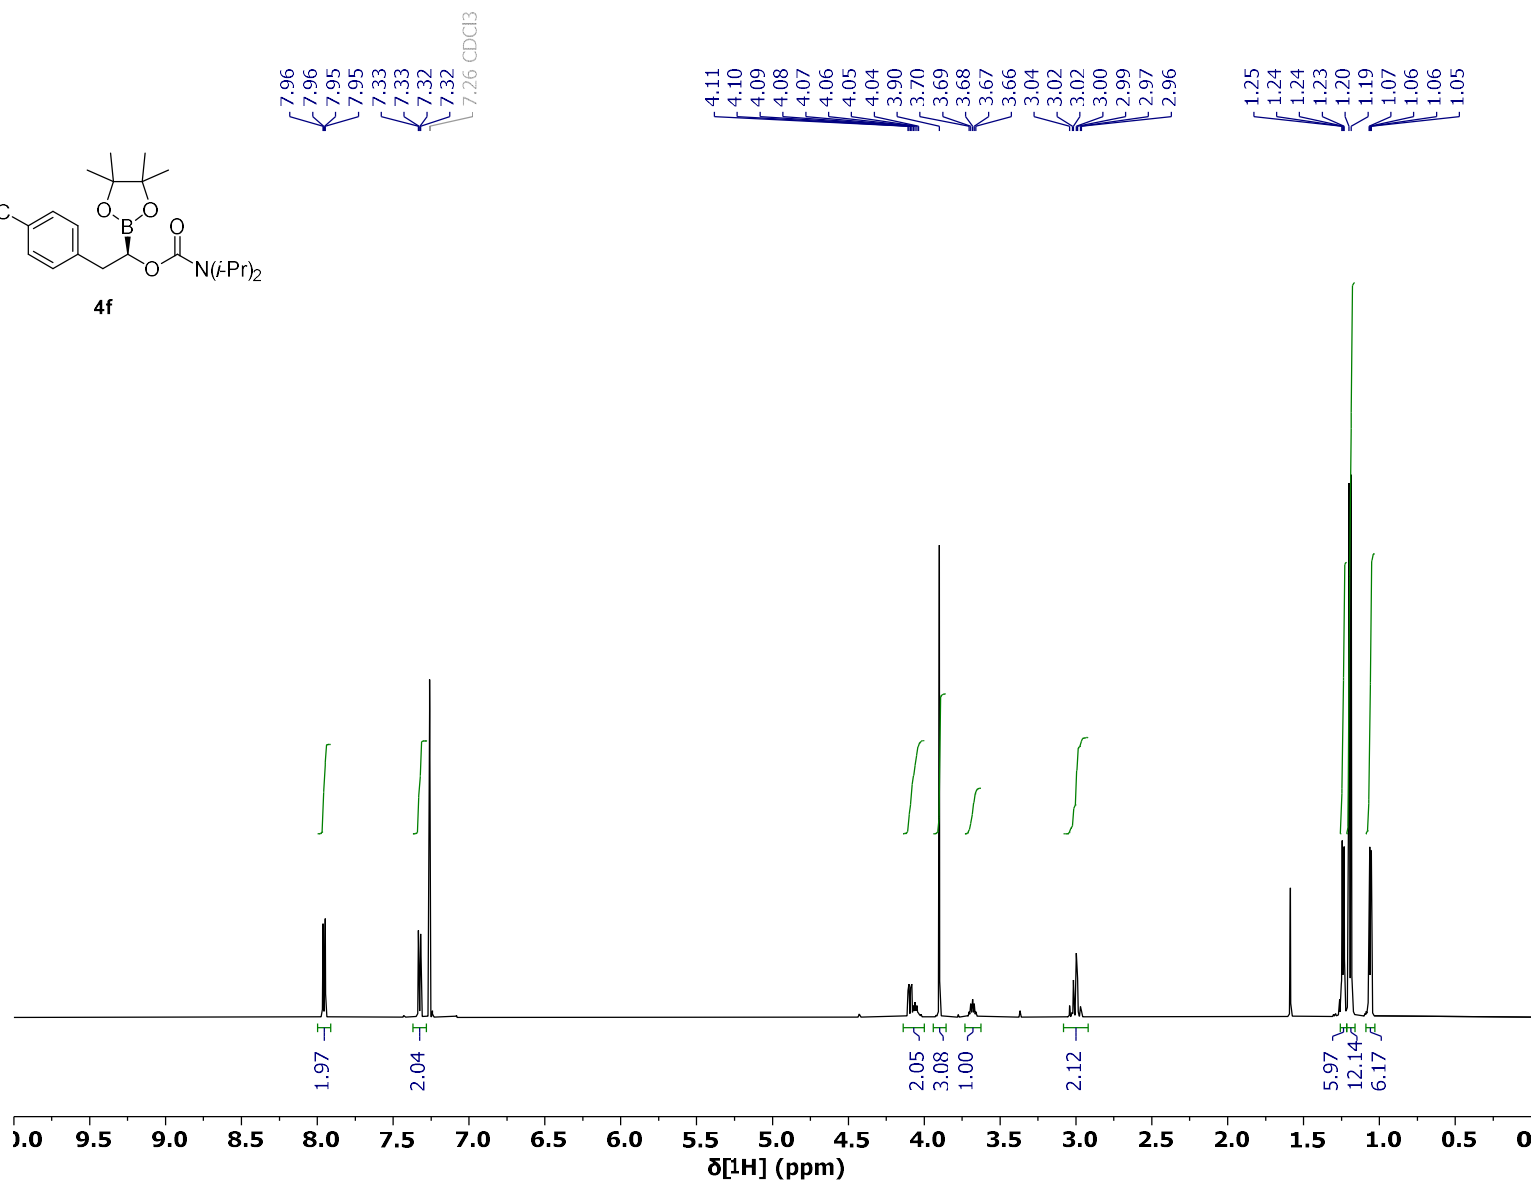

S145

$^{13}\text{C}$  NMR (151 MHz,  $\text{CDCl}_3$ )

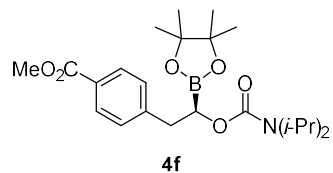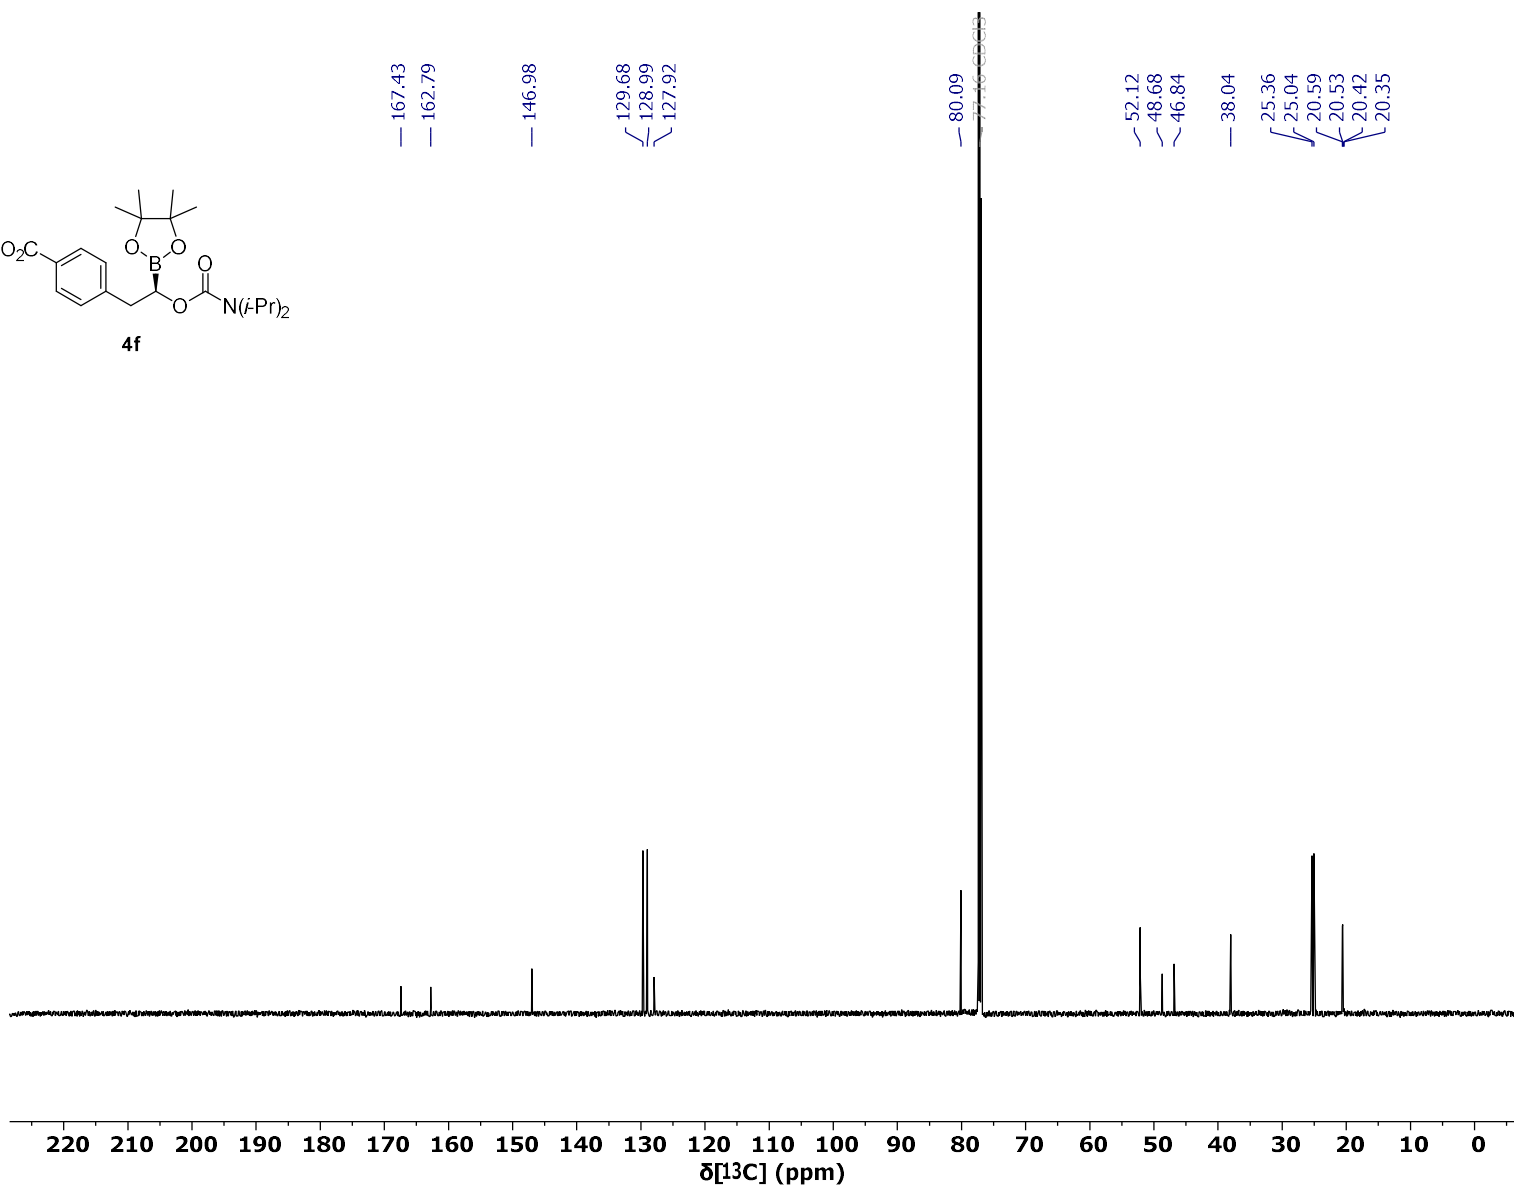

$^{11}\text{B}$  NMR (128 MHz,  $\text{CDCl}_3$ )

— 12.59

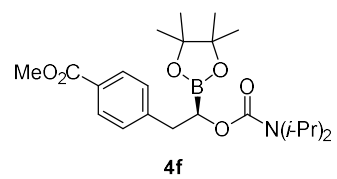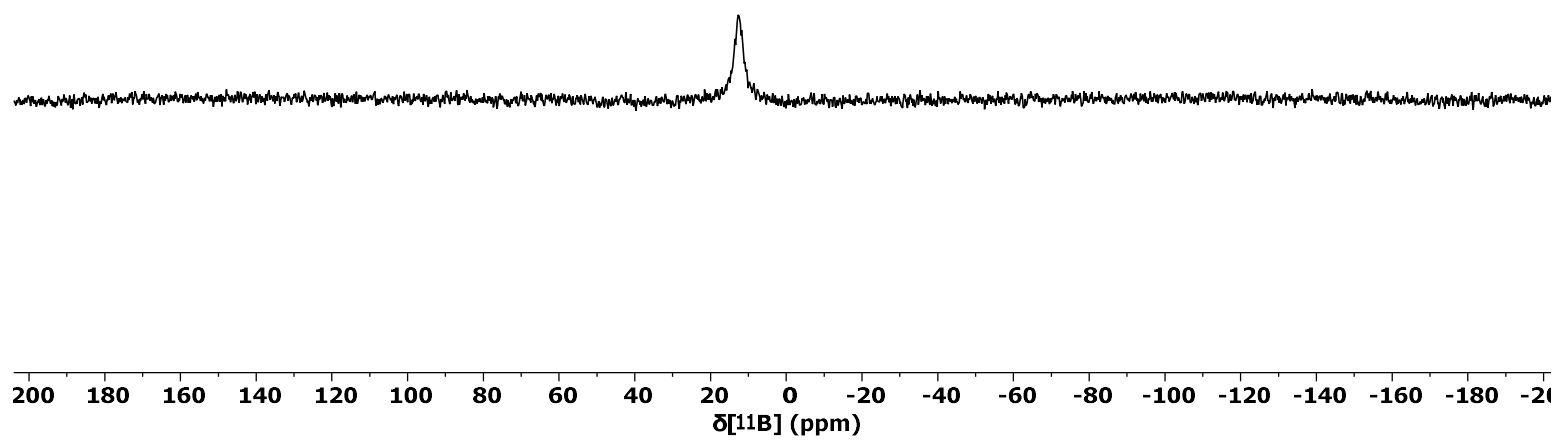

S147

$^1\text{H}$  NMR (400 MHz,  $\text{CDCl}_3$ )

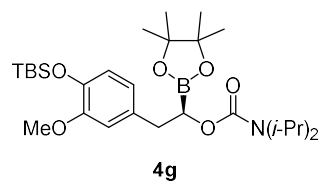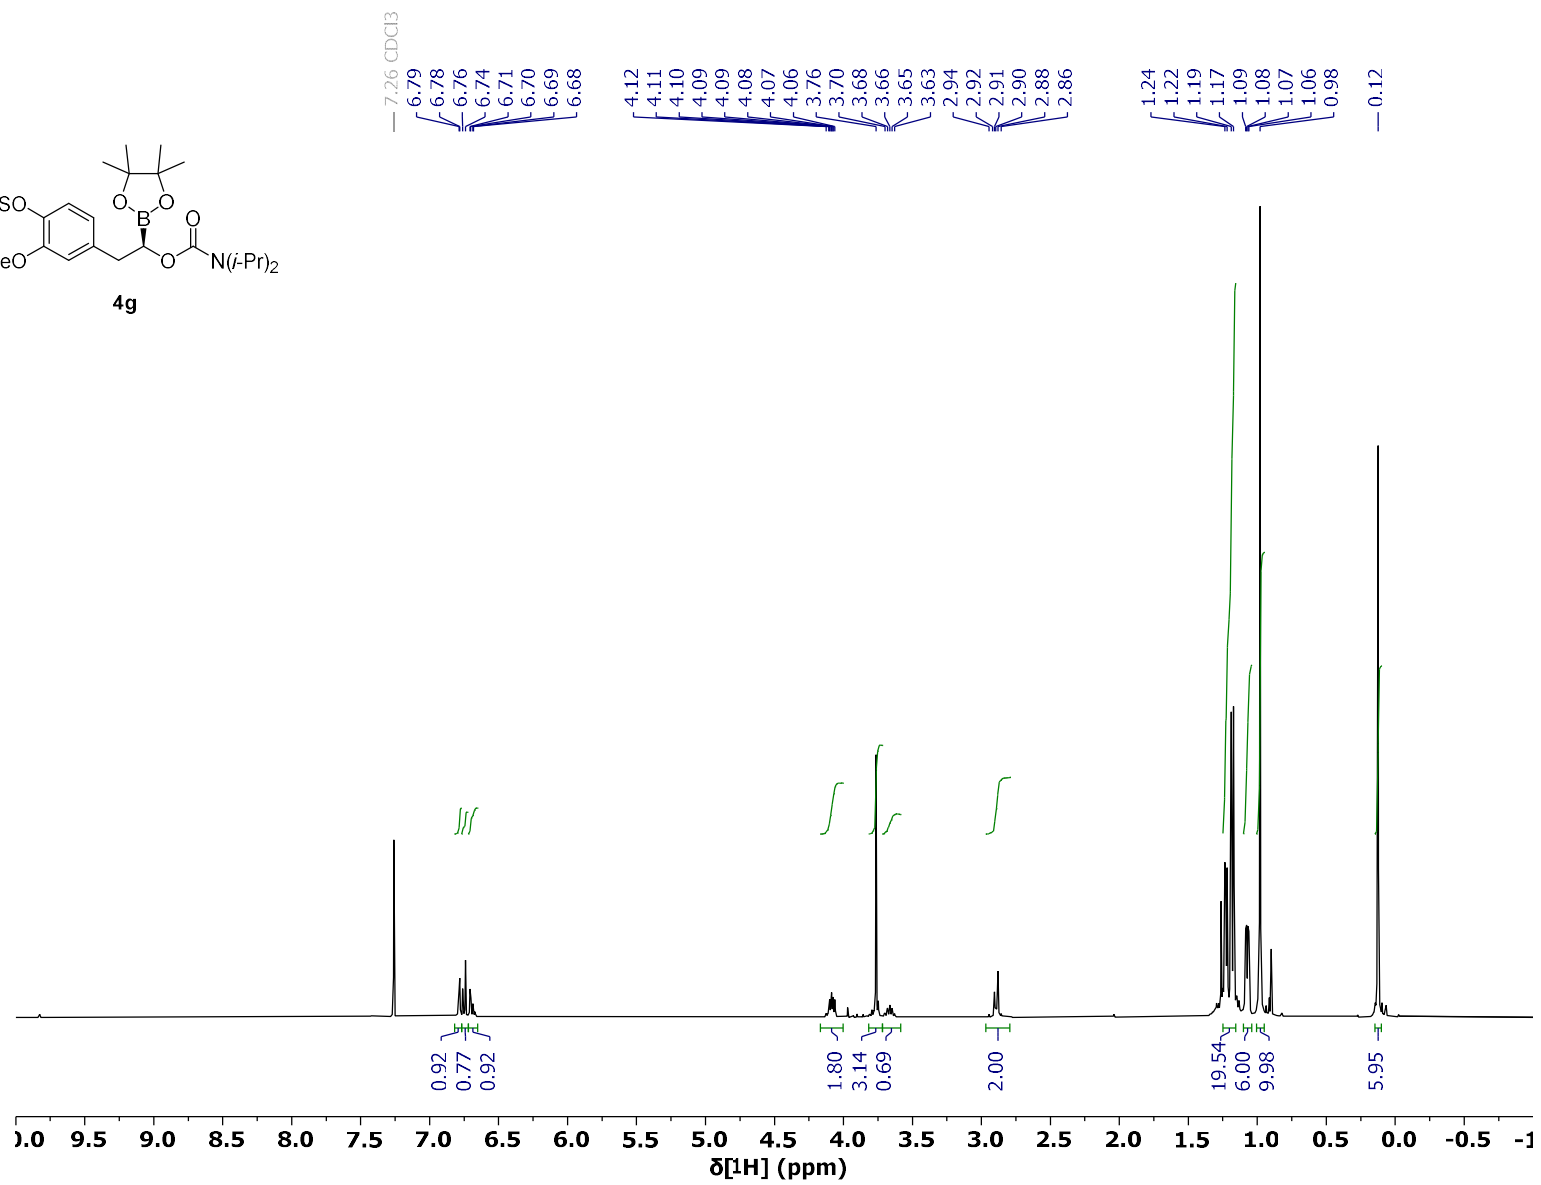

$^{13}\text{C}$  NMR (151 MHz,  $\text{CDCl}_3$ )

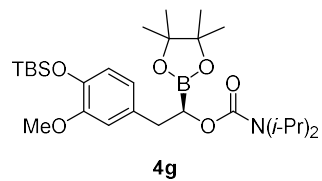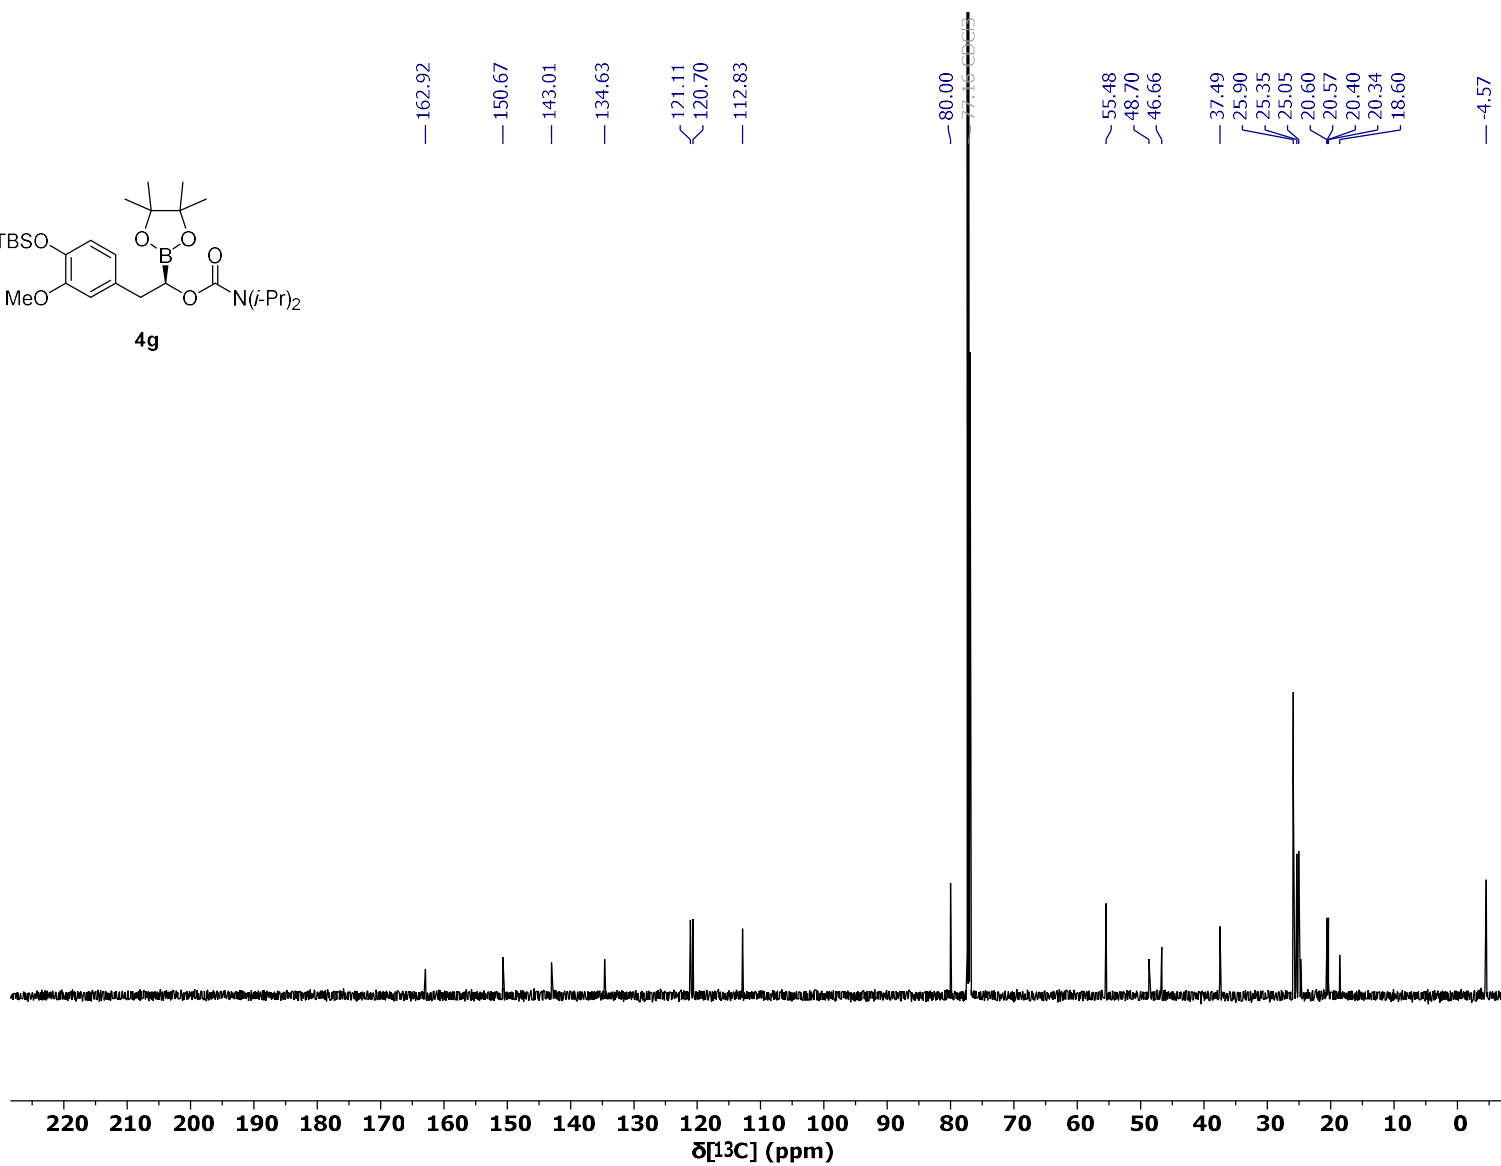

$^{11}\text{B}$  NMR (128 MHz,  $\text{CDCl}_3$ )

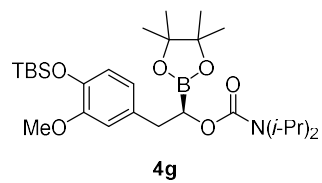

— 12.73

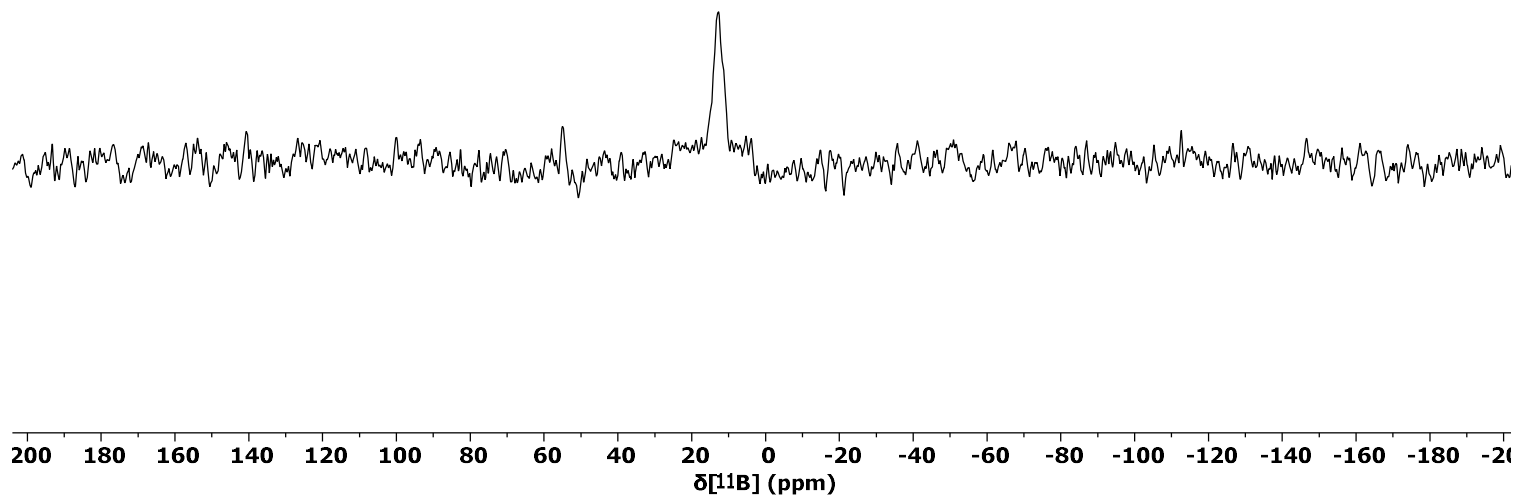

S150

$^1\text{H}$  NMR (400 MHz,  $\text{CDCl}_3$ )

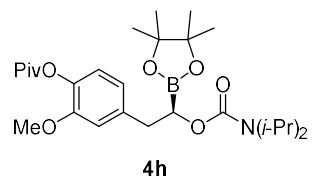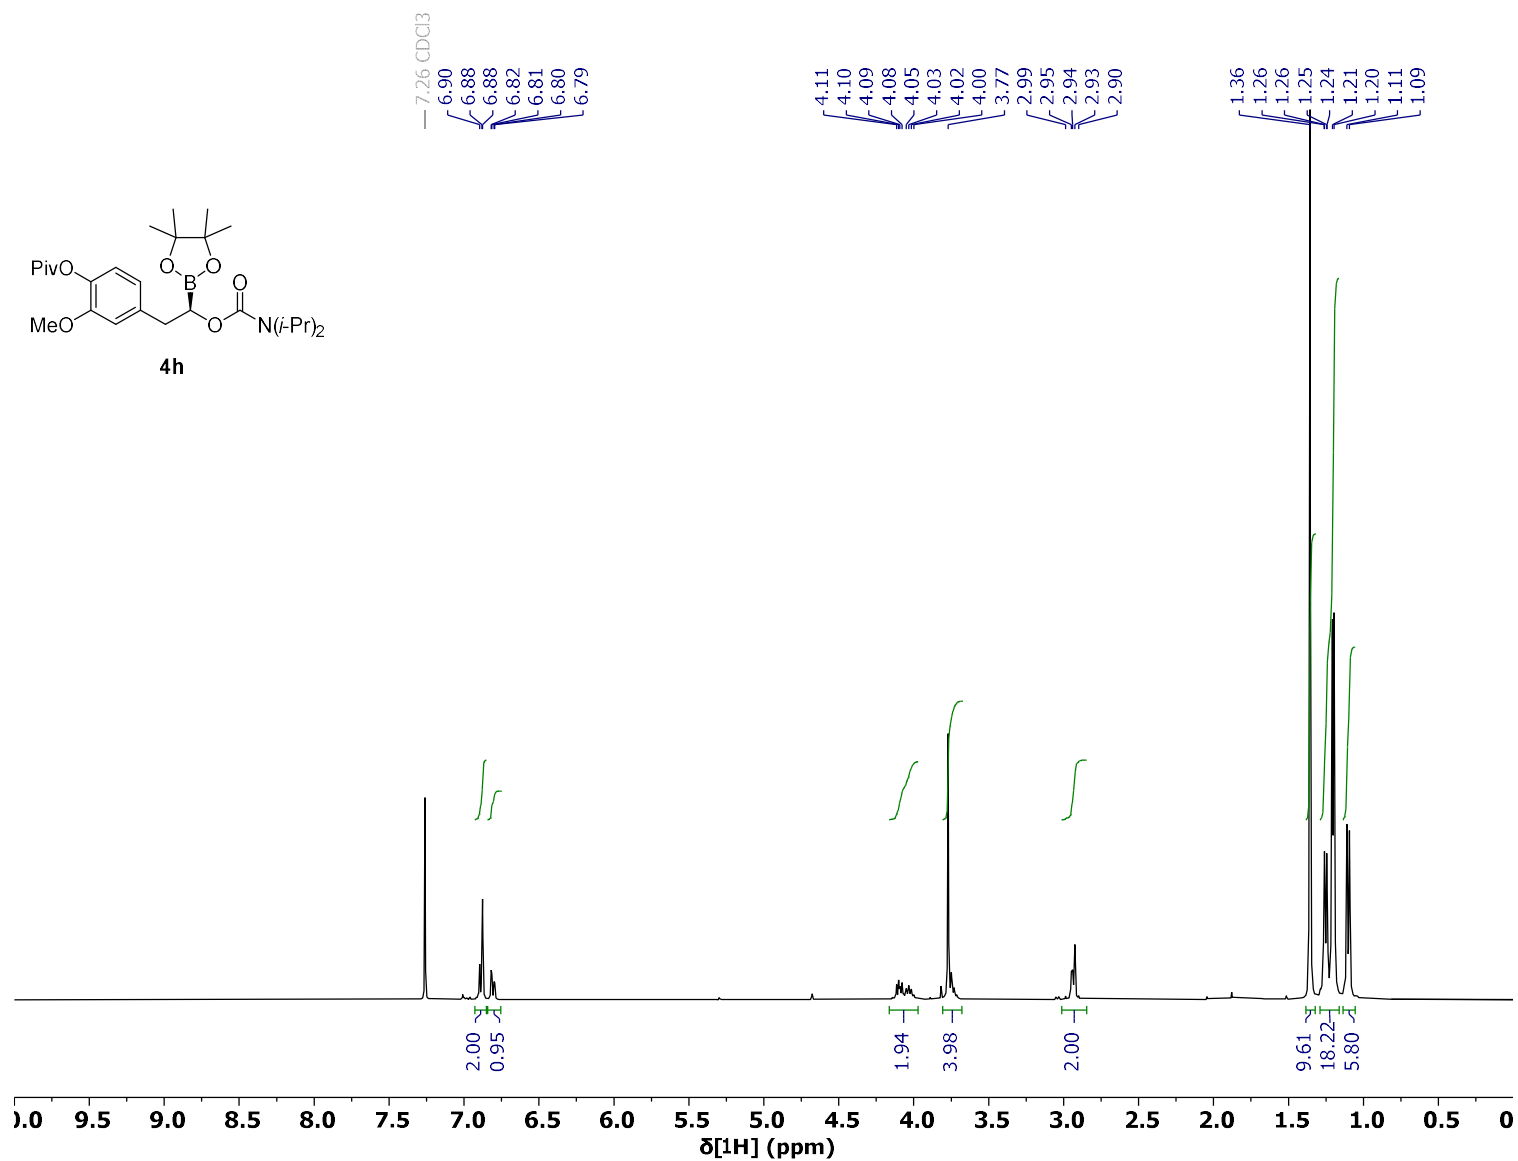

$^{13}\text{C}$  NMR (151 MHz,  $\text{CDCl}_3$ )

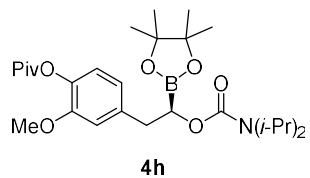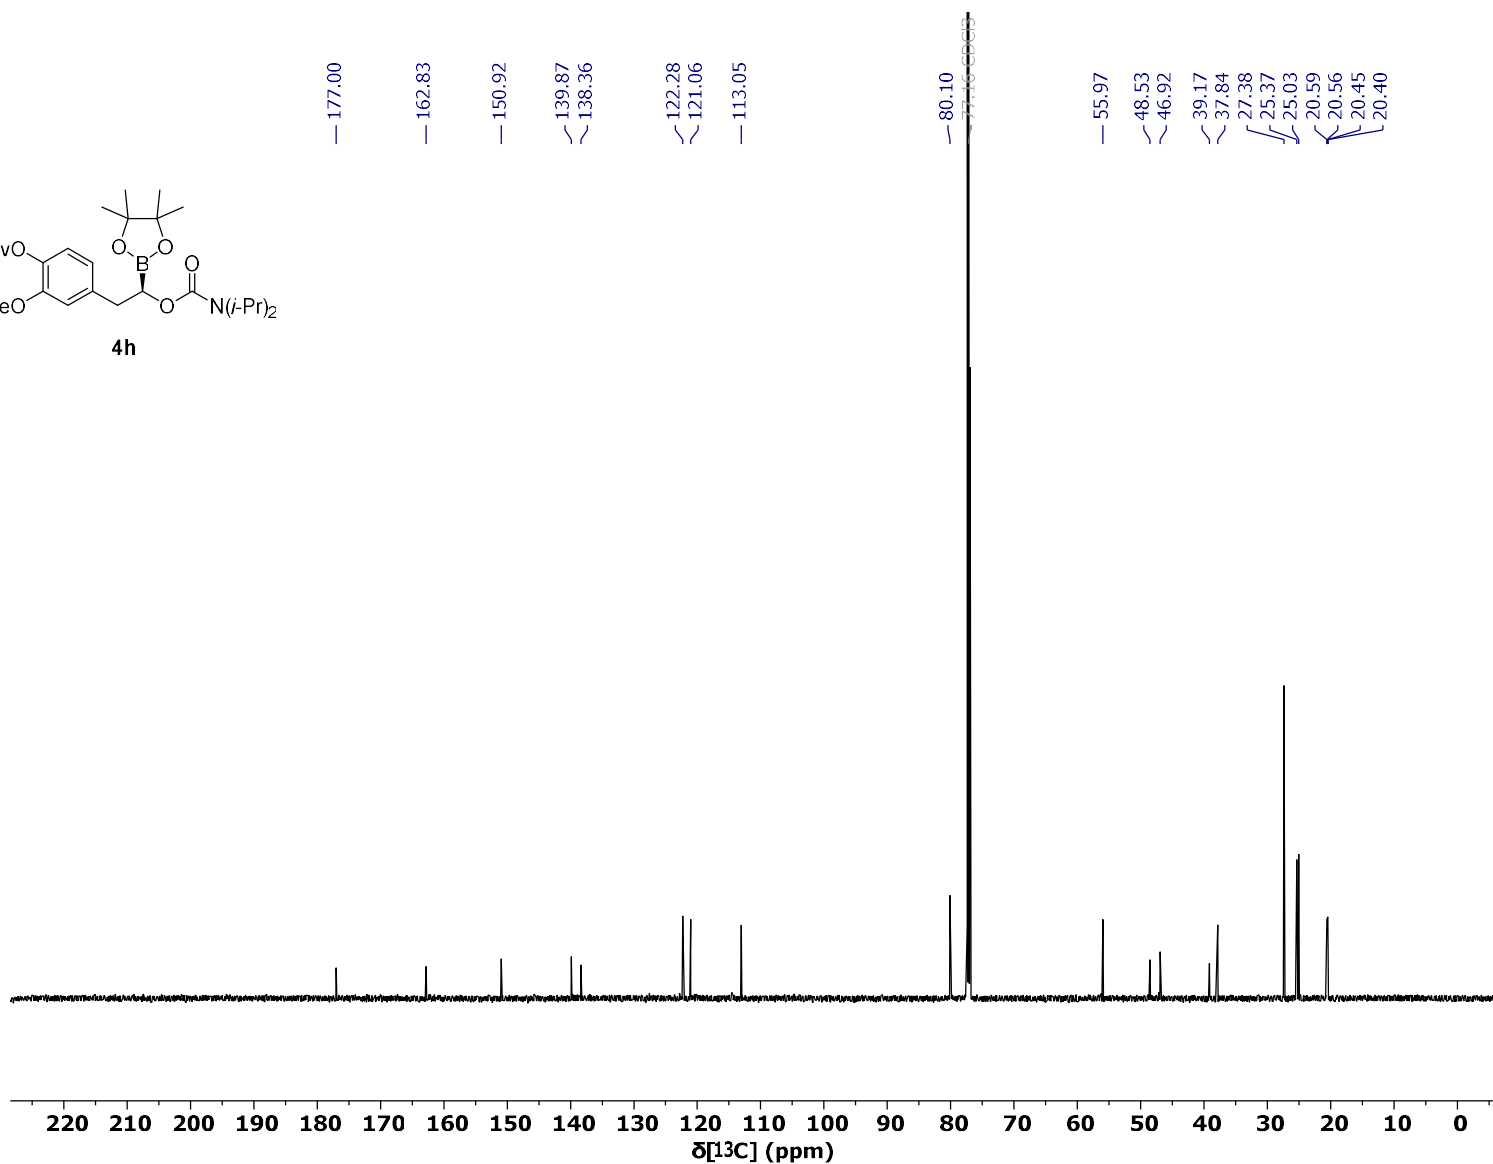





<sup>1</sup>H NMR (600 MHz, CDCl<sub>3</sub>)

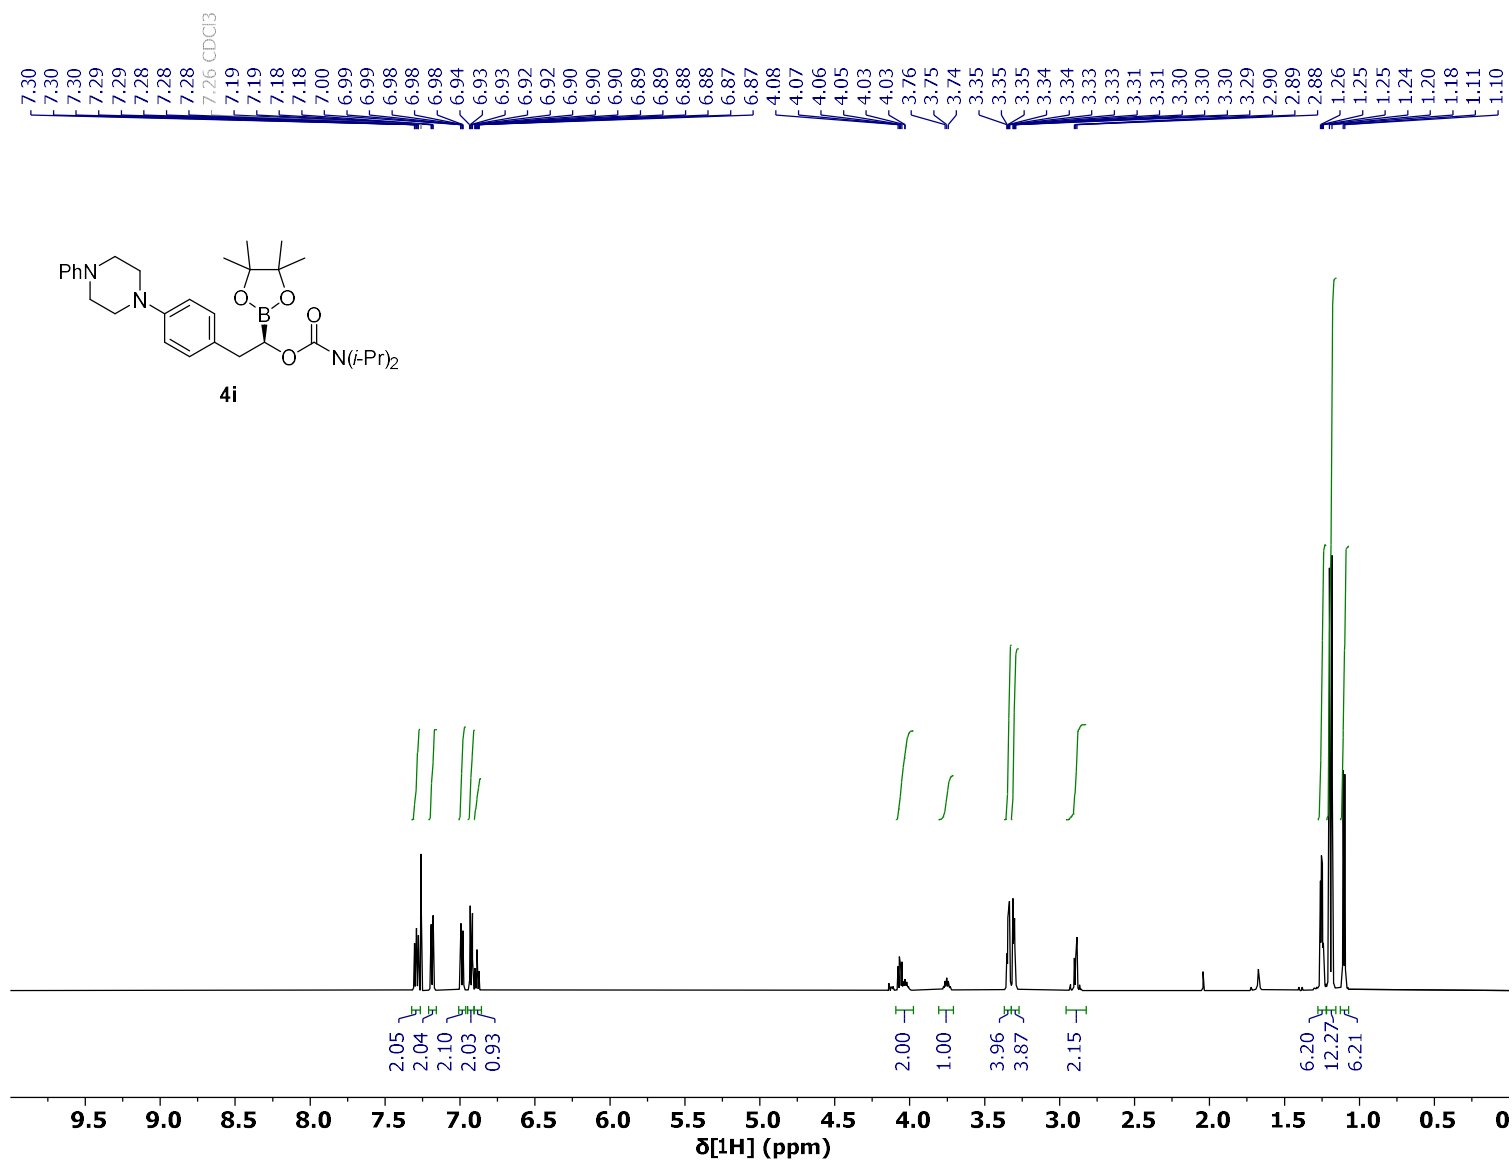

$^{13}\text{C}$  NMR (101 MHz,  $\text{CDCl}_3$ )

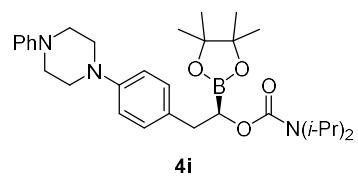

— 162.75  
~ 151.30  
~ 149.41  
/ 132.98  
/ 129.50  
/ 129.18  
/ 120.01  
/ 116.48  
/ 116.32  
— 79.85  
/ 49.91  
/ 49.46  
/ 48.30  
/ 46.76  
— 36.91  
/ 25.22  
/ 24.95  
/ 20.51  
/ 20.45  
/ 20.36  
/ 20.30

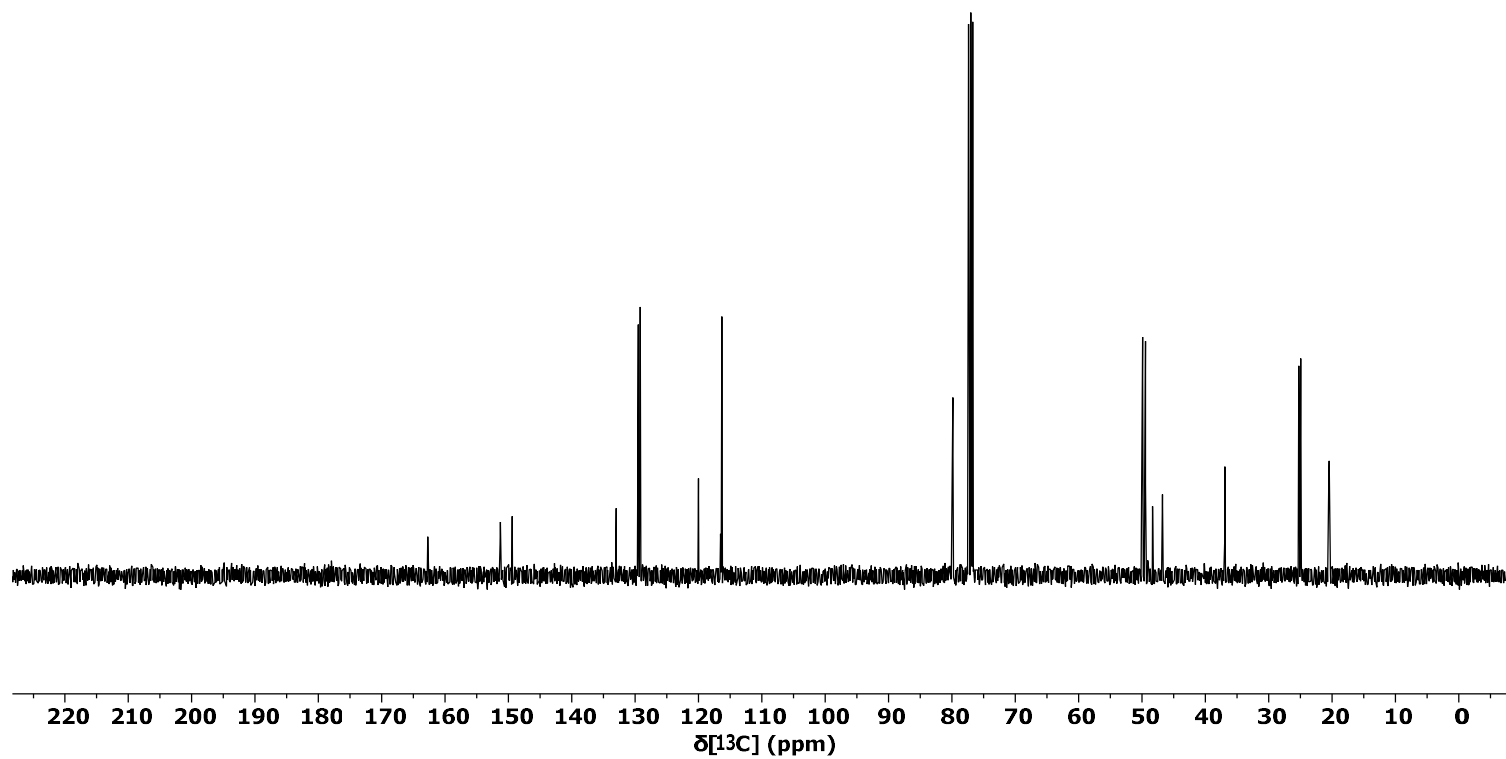

$^{11}\text{B}$  NMR (128 MHz,  $\text{CDCl}_3$ )

— 12.88

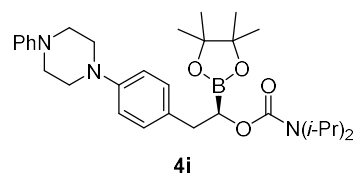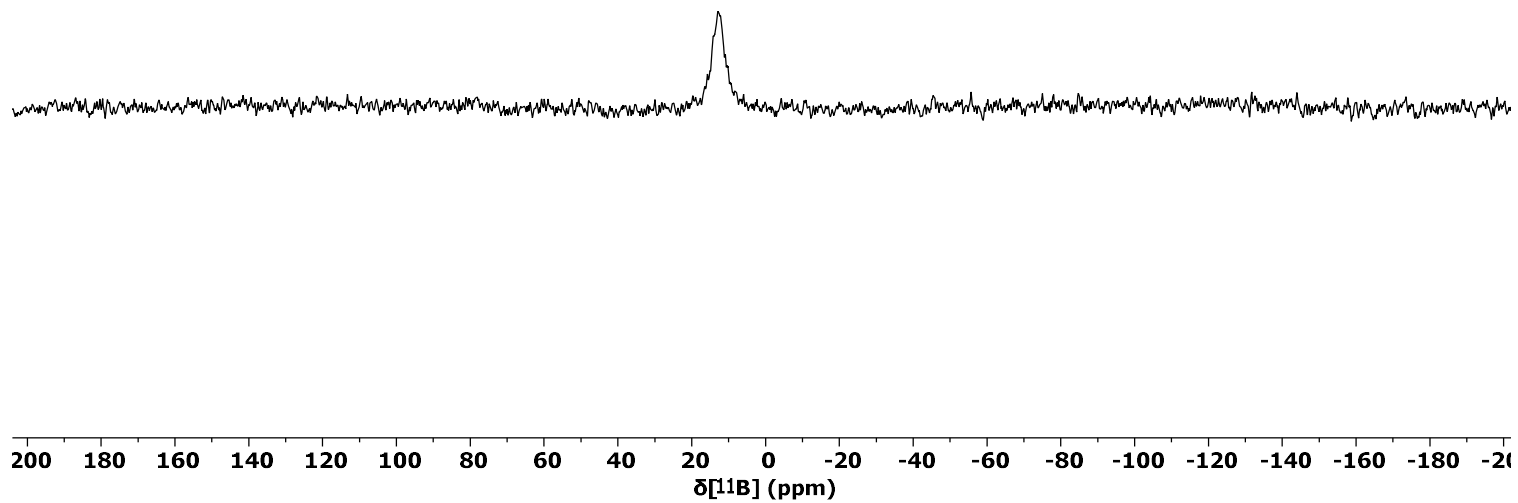

S156

$^1\text{H}$  NMR (400 MHz,  $\text{CDCl}_3$ )

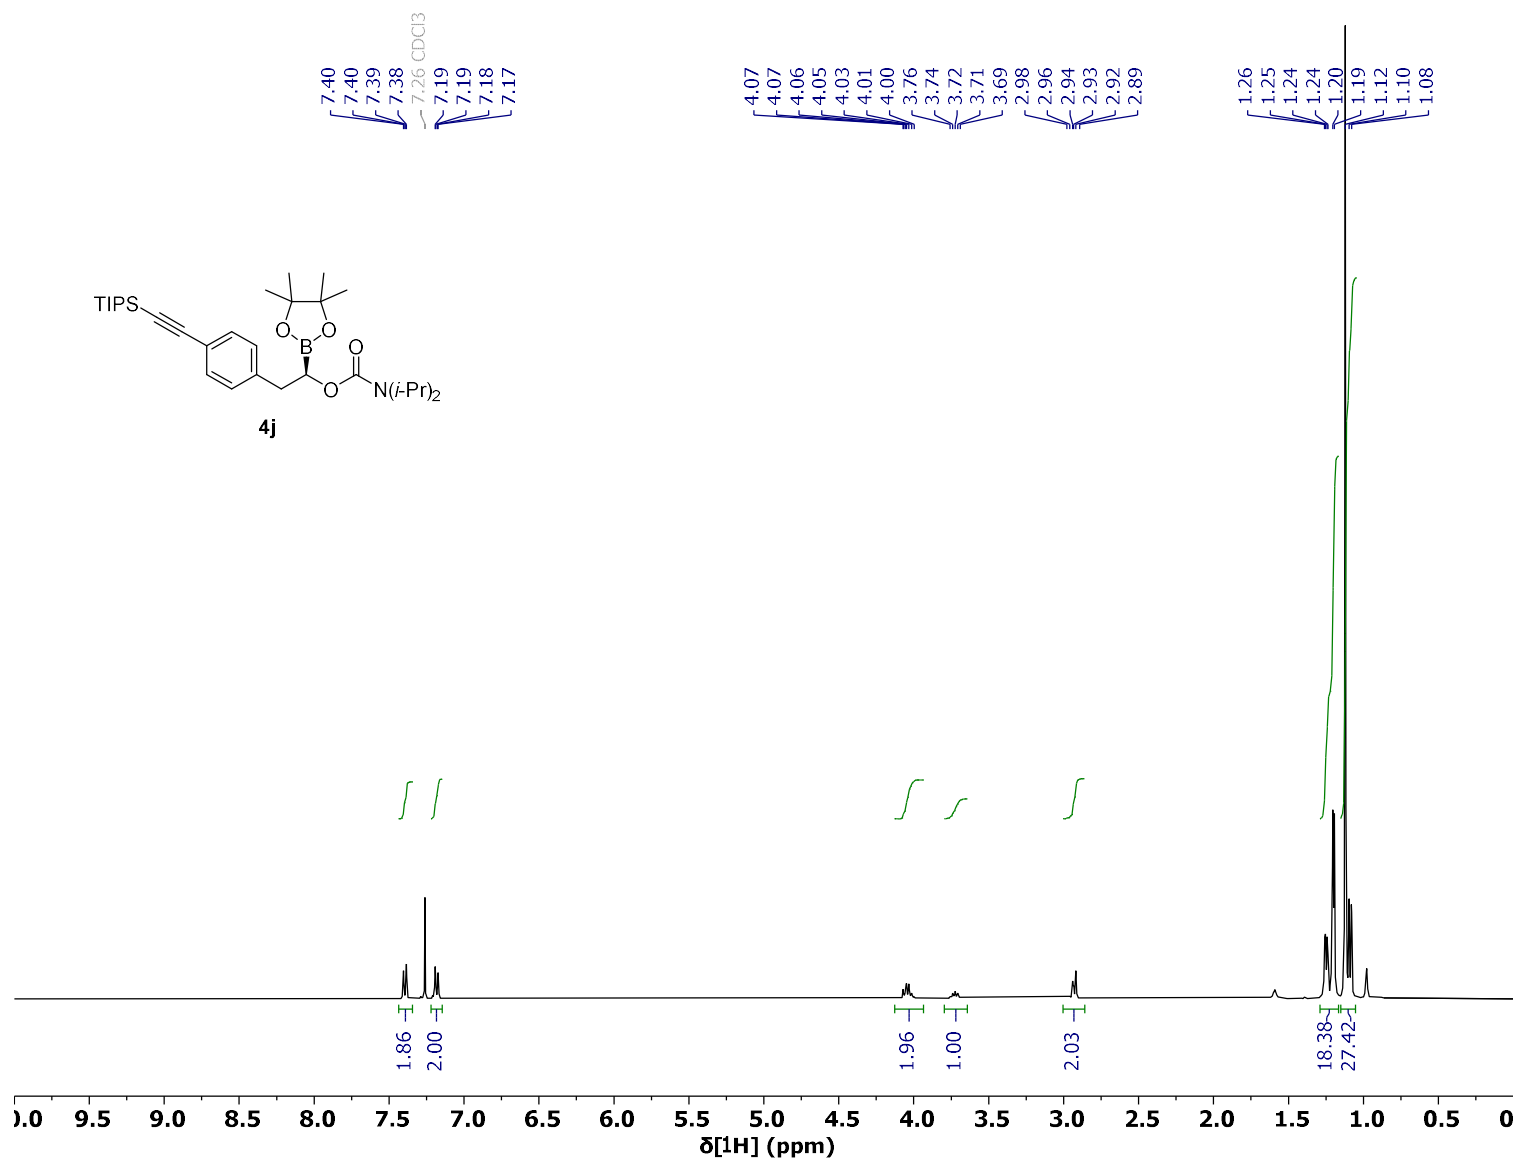

$^{13}\text{C}$  NMR (151 MHz,  $\text{CDCl}_3$ )

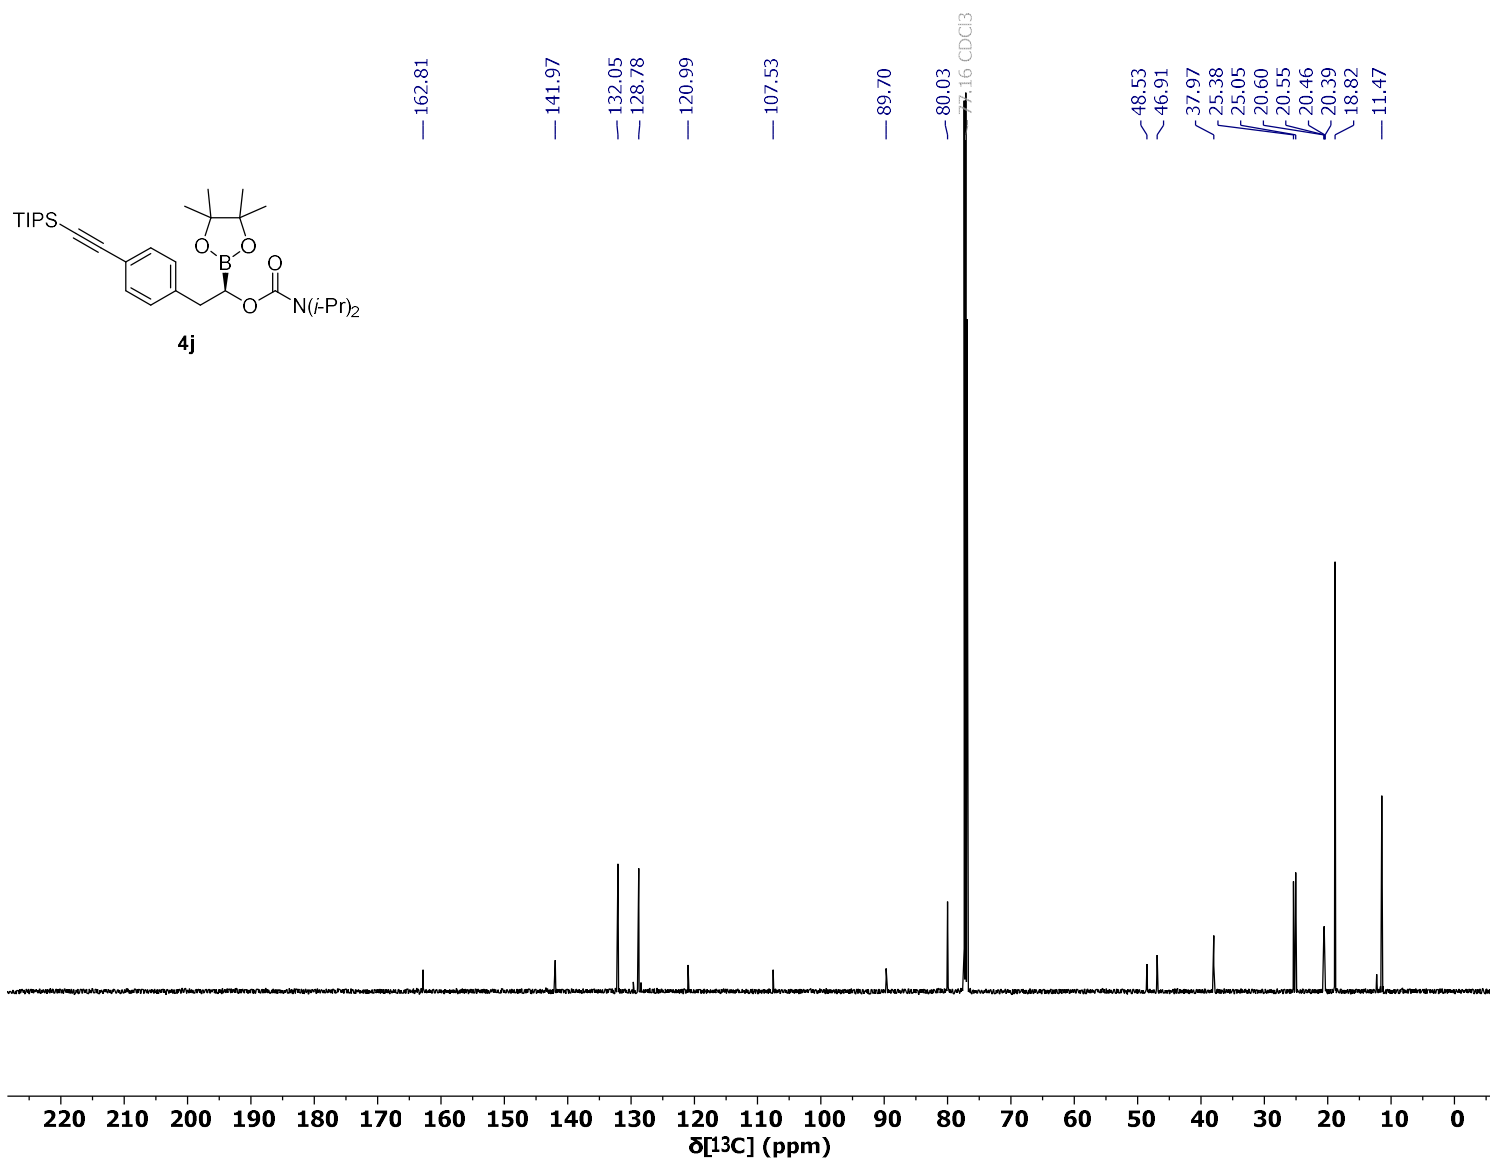

$^{11}\text{B}$  NMR (128 MHz,  $\text{CDCl}_3$ )

— 12.33

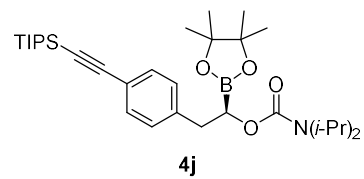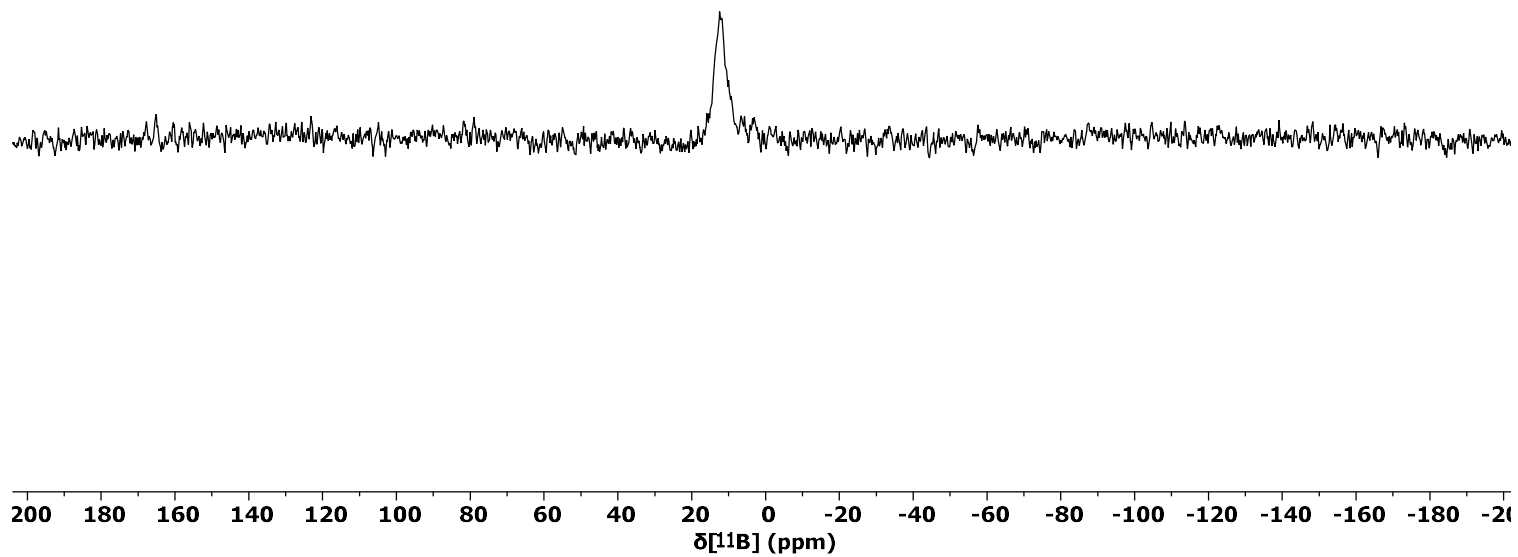

S159

<sup>1</sup>H NMR (400 MHz, CDCl<sub>3</sub>)

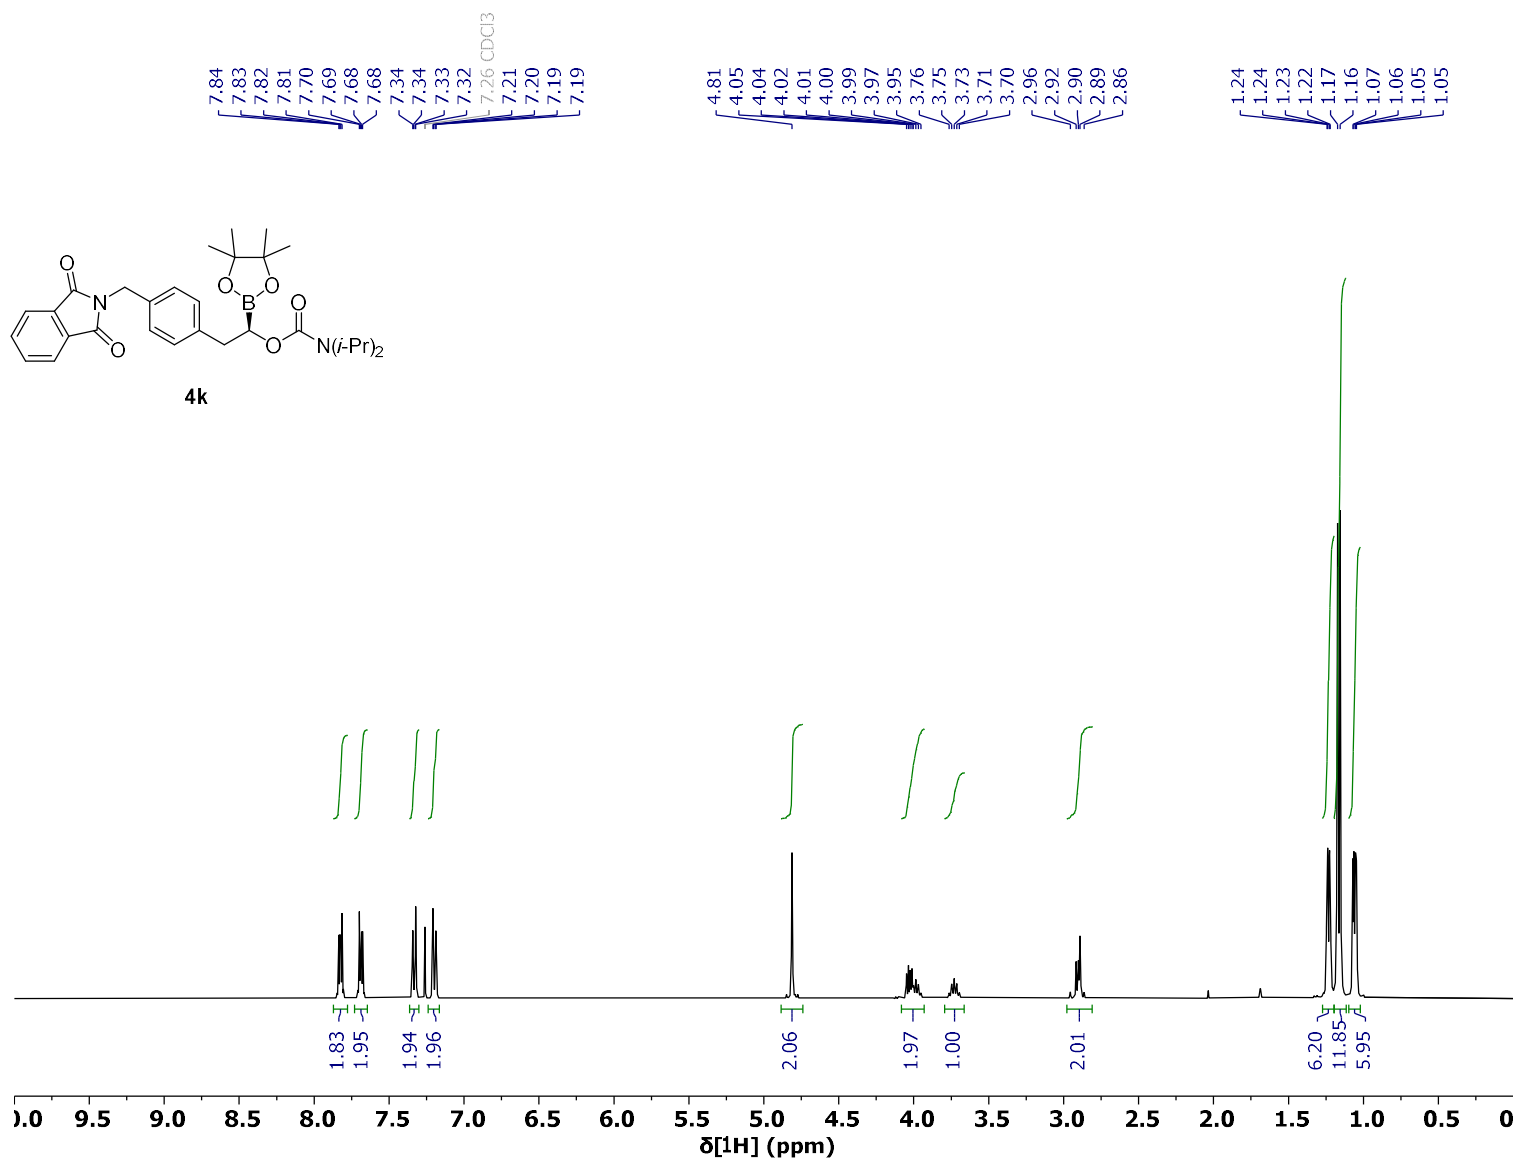

S160



$^{13}\text{C}$  NMR (101 MHz,  $\text{CDCl}_3$ )

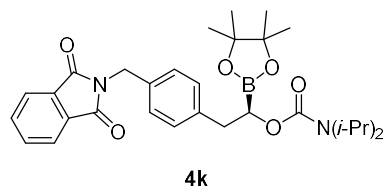

— 168.07  
— 162.64

✓ 140.88  
✓ 133.94  
✓ 133.81  
— 132.19  
✓ 129.11  
✓ 128.44  
✓ 123.29

— 79.86

— 48.25  
✓ 46.82  
— 41.39  
— 37.46  
✓ 25.18  
✓ 24.91  
✓ 20.43  
✓ 20.39  
✓ 20.33  
✓ 20.27

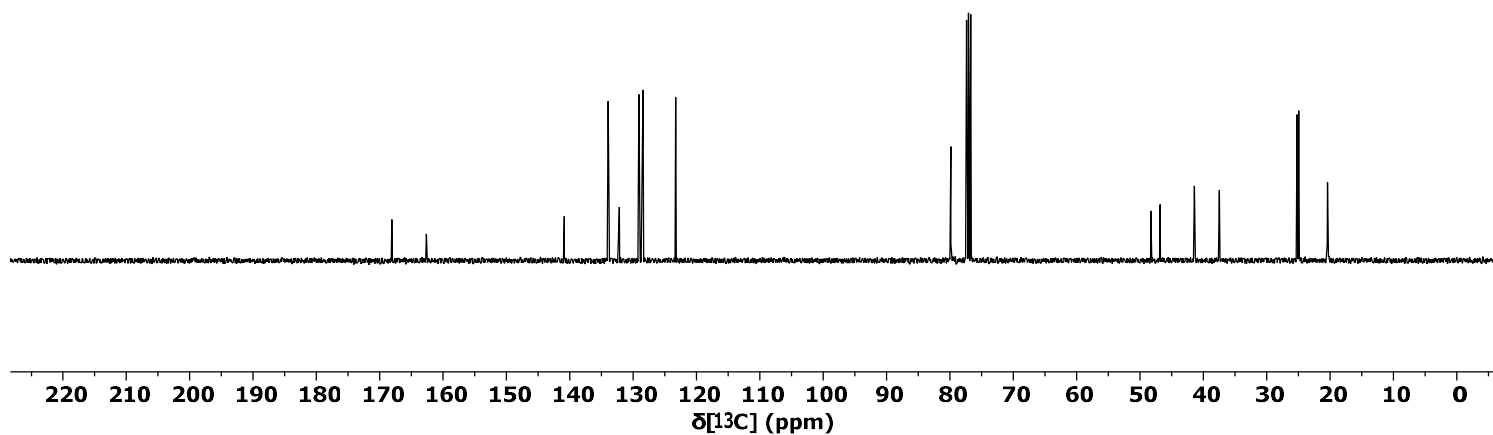

$^{11}\text{B}$  NMR (128 MHz,  $\text{CDCl}_3$ )

— 12.43

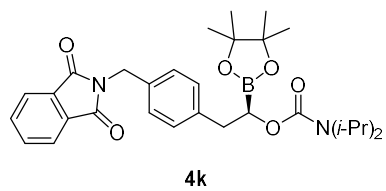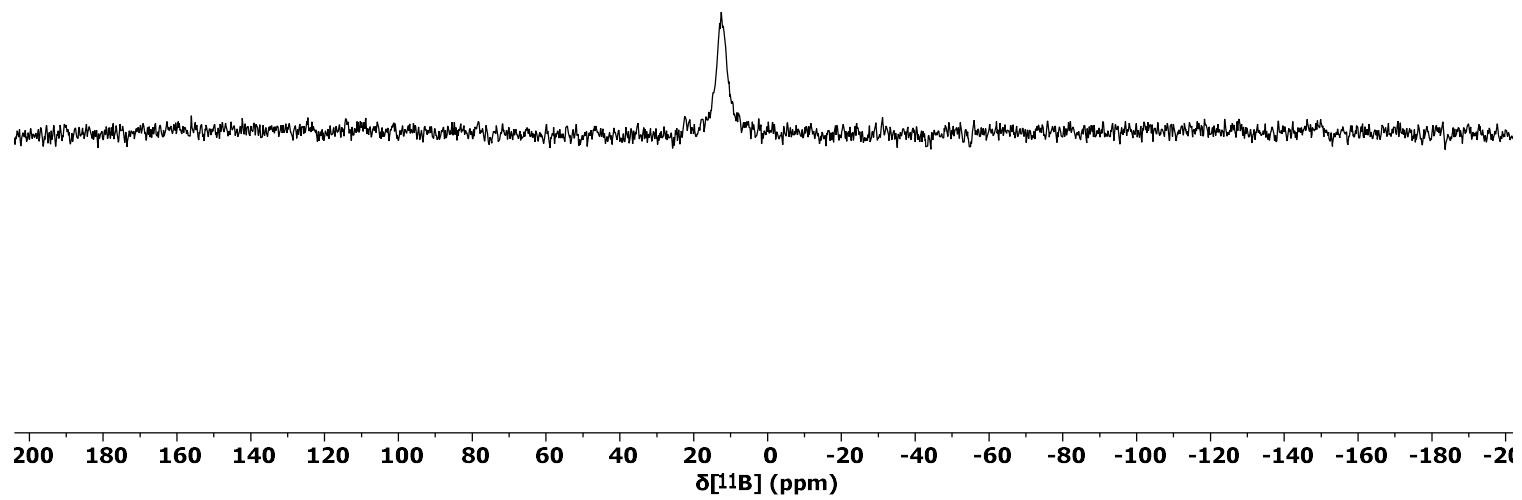

S162

$^1\text{H}$  NMR (400 MHz,  $\text{CDCl}_3$ )

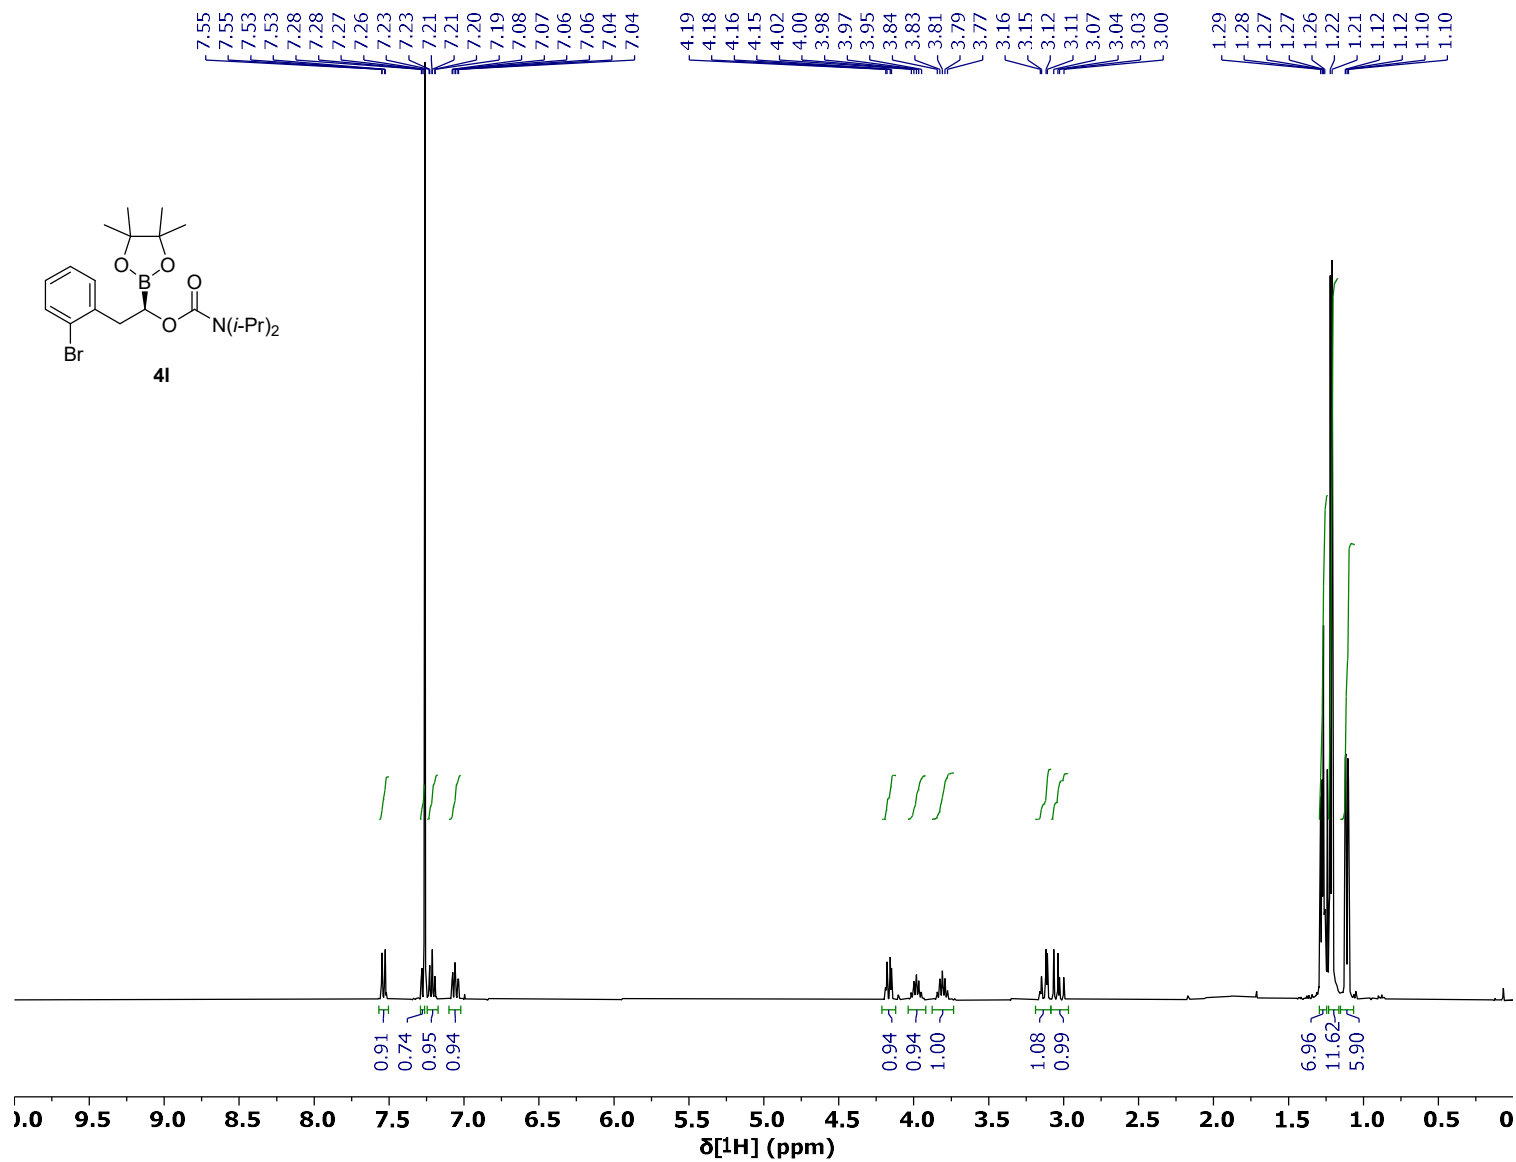

S163

$^{13}\text{C}$  NMR (151 MHz,  $\text{CDCl}_3$ )

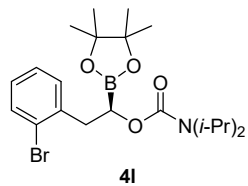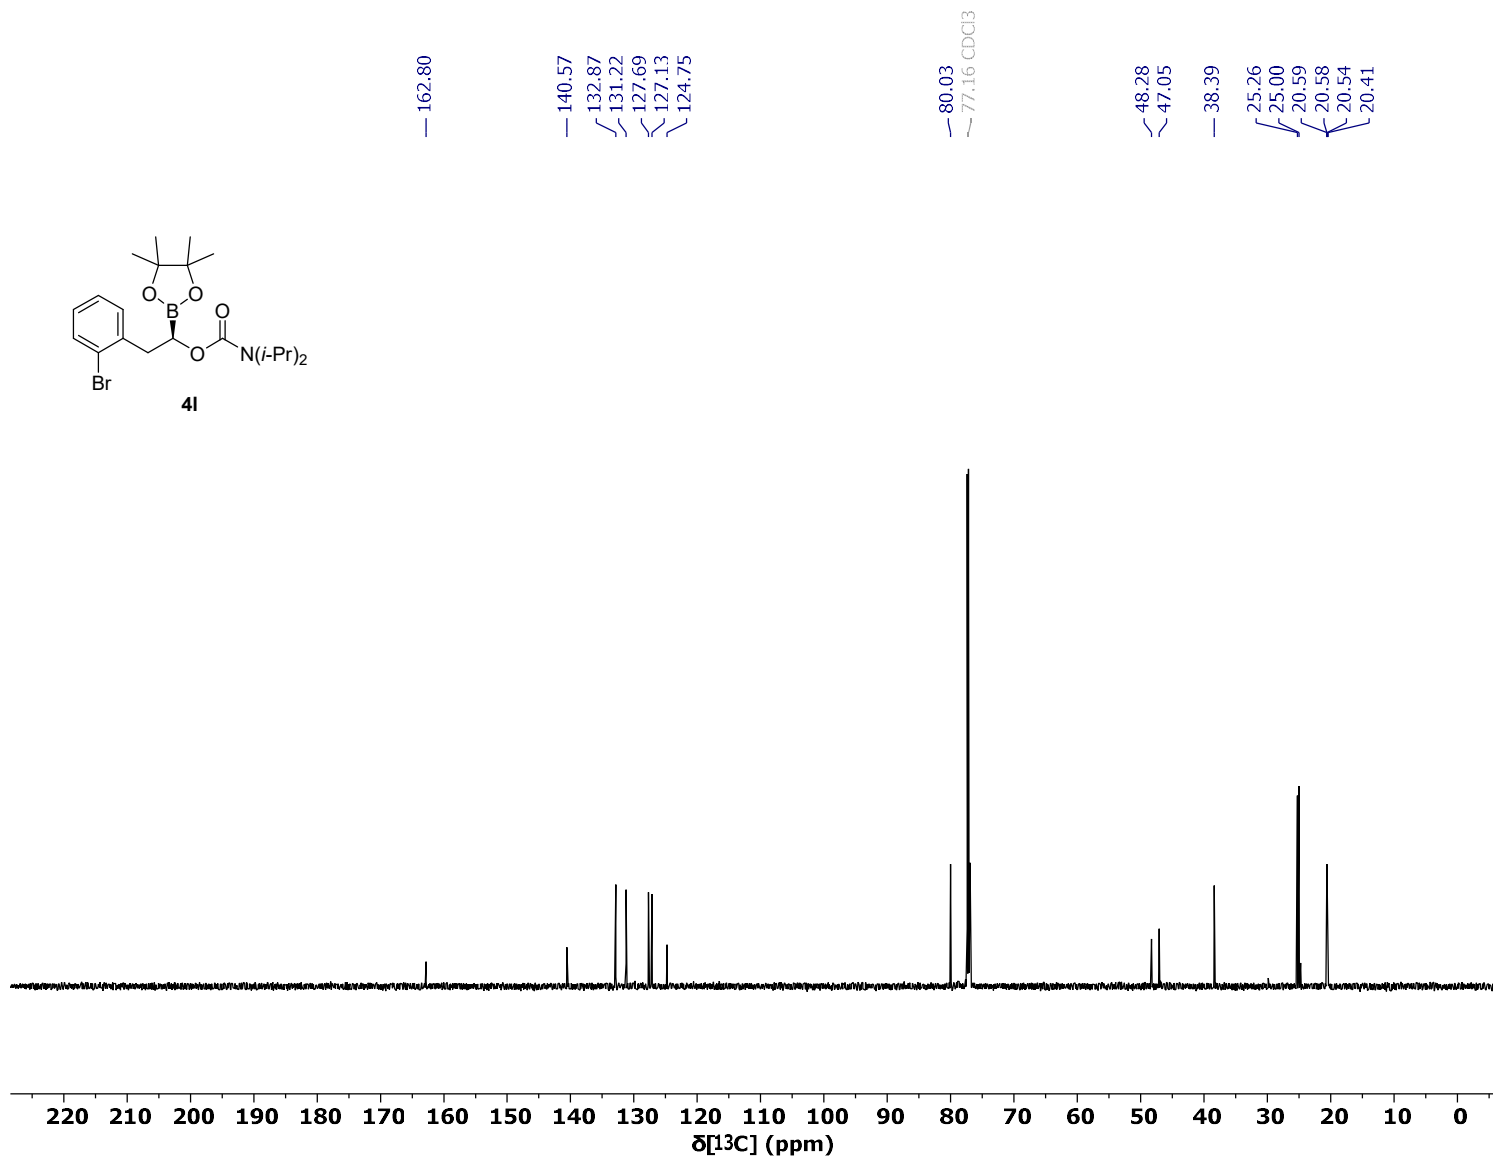

$^{11}\text{B}$  NMR (128 MHz,  $\text{CDCl}_3$ )

—12.59

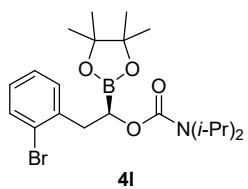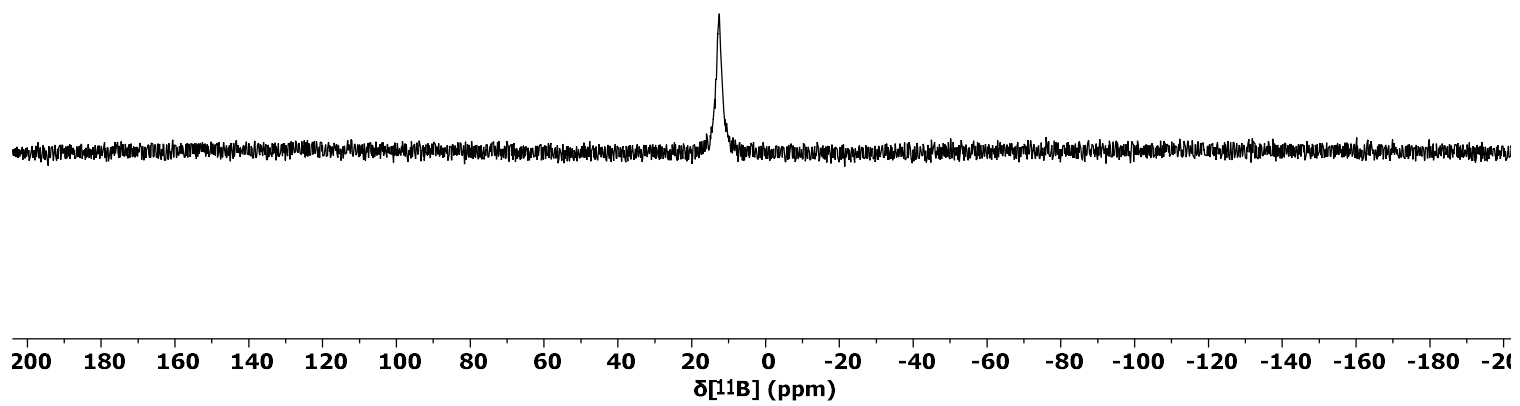

S165

<sup>1</sup>H NMR (400 MHz, CDCl<sub>3</sub>)

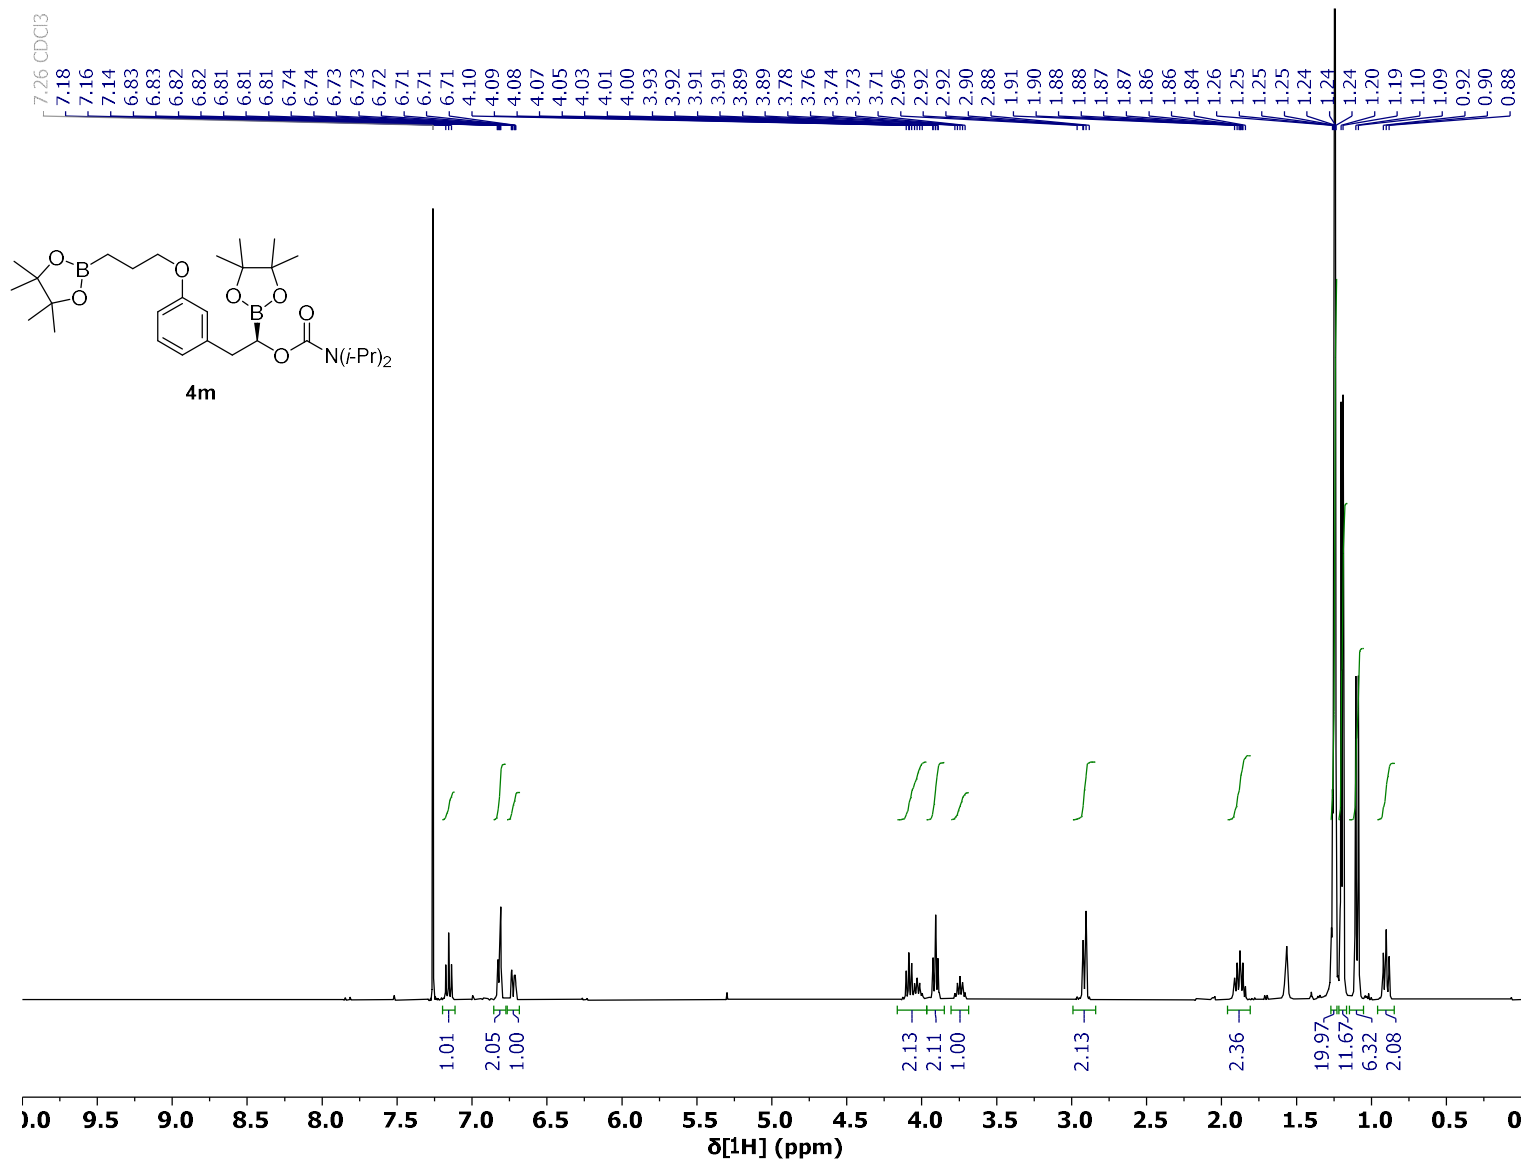

$^{13}\text{C}$  NMR (151 MHz,  $\text{CDCl}_3$ )

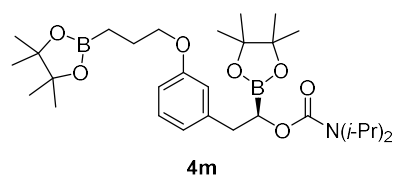

— 162.85  
— 159.22  
  
— 142.87  
  
— 129.08  
~ 121.12  
~ 115.03  
~ 112.23  
  
— 83.21  
— 79.97  
~ 77.16  $\text{CDCl}_3$   
— 69.61  
  
~ 48.45  
~ 46.87  
  
— 38.05  
— 25.34  
— 25.04  
— 24.97  
— 24.85  
— 23.96  
— 20.61  
— 20.54  
— 20.46  
— 20.40

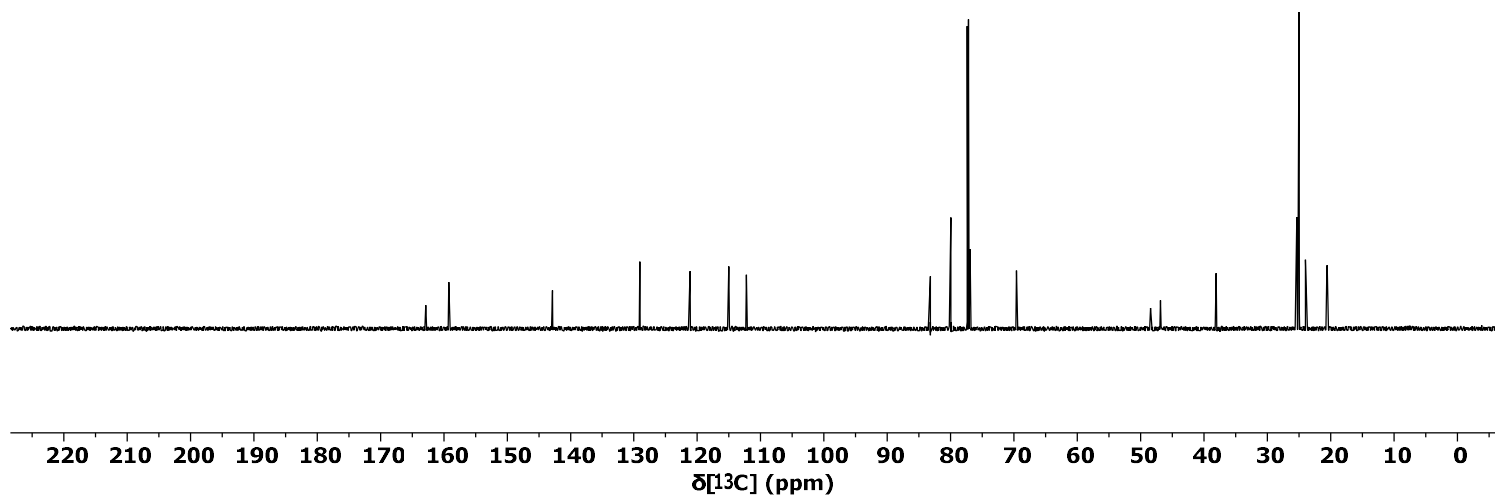

$^{11}\text{B}$  NMR (128 MHz,  $\text{CDCl}_3$ )

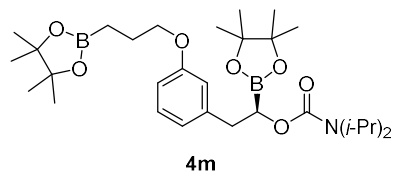

— 33.95  
— 12.48

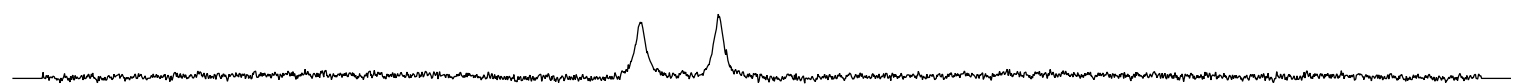

200 180 160 140 120 100 80 60 40 20 0 -20 -40 -60 -80 -100 -120 -140 -160 -180 -200  
 $\delta$ [ $^{11}\text{B}$ ] (ppm)

S168



<sup>1</sup>H NMR (400 MHz, CDCl<sub>3</sub>)

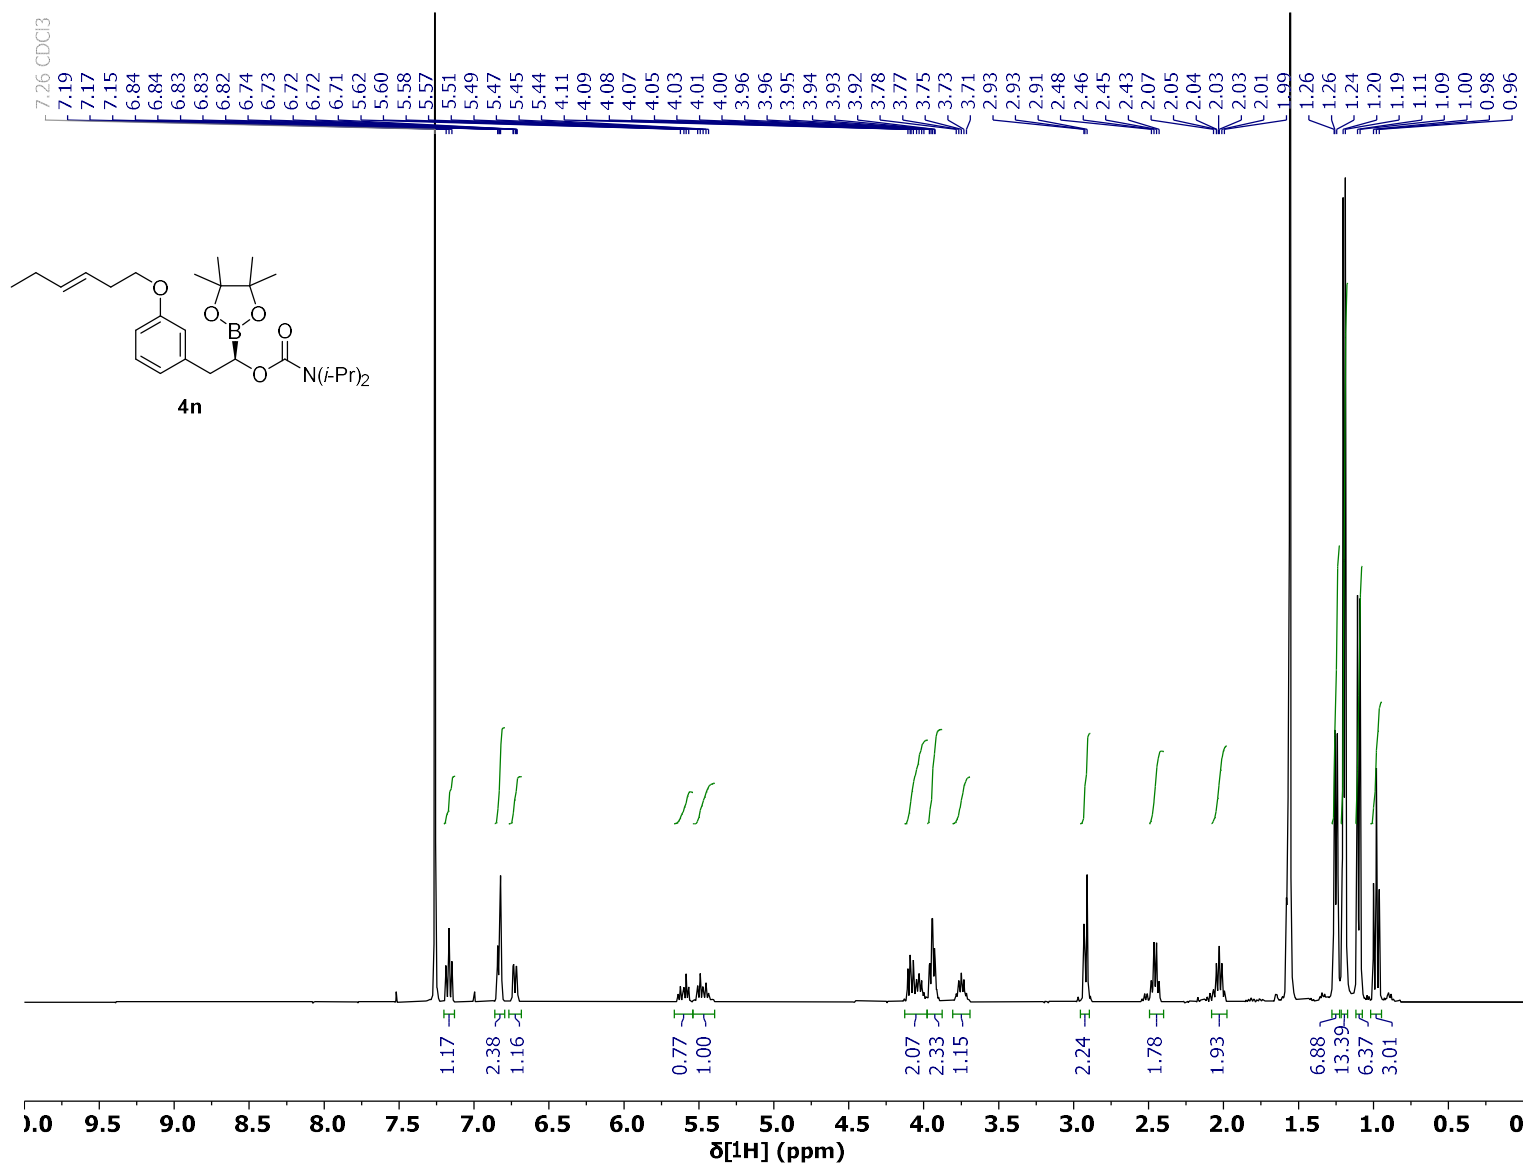

$^{13}\text{C}$  NMR (151 MHz,  $\text{CDCl}_3$ )

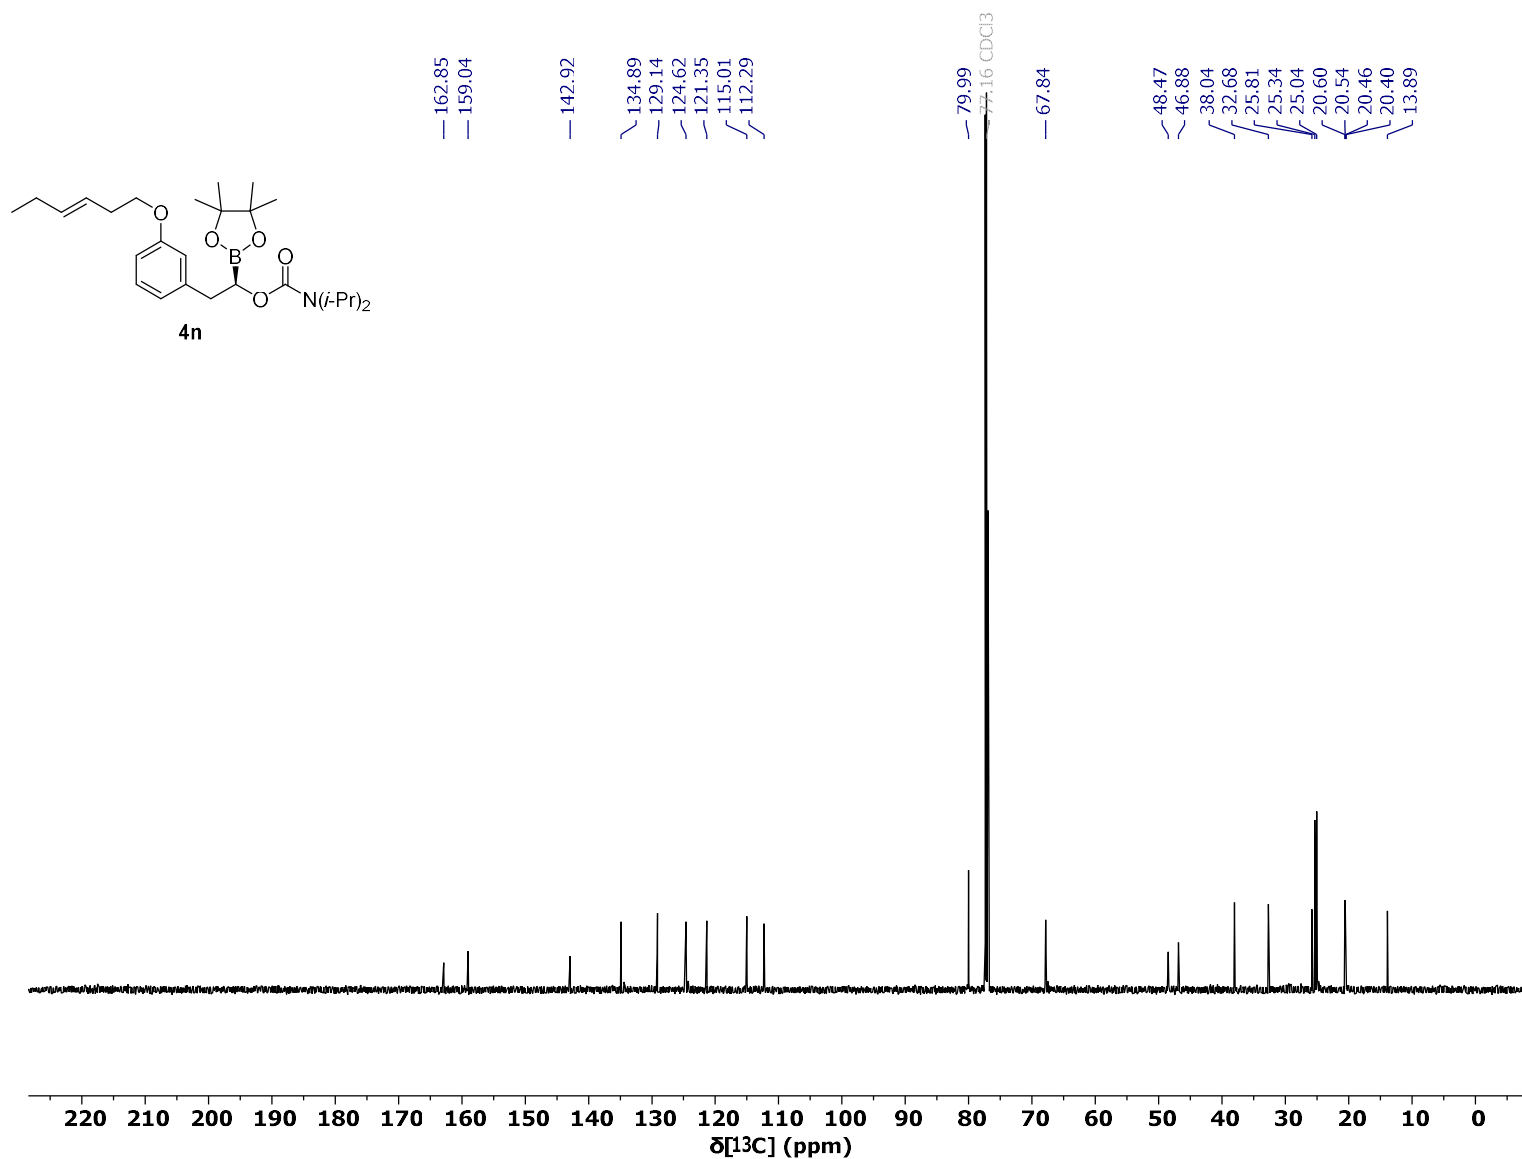

$^{11}\text{B}$  NMR (128 MHz,  $\text{CDCl}_3$ )

— 12.92

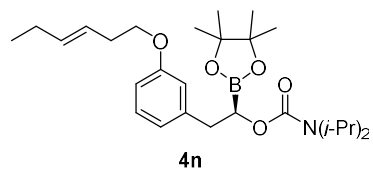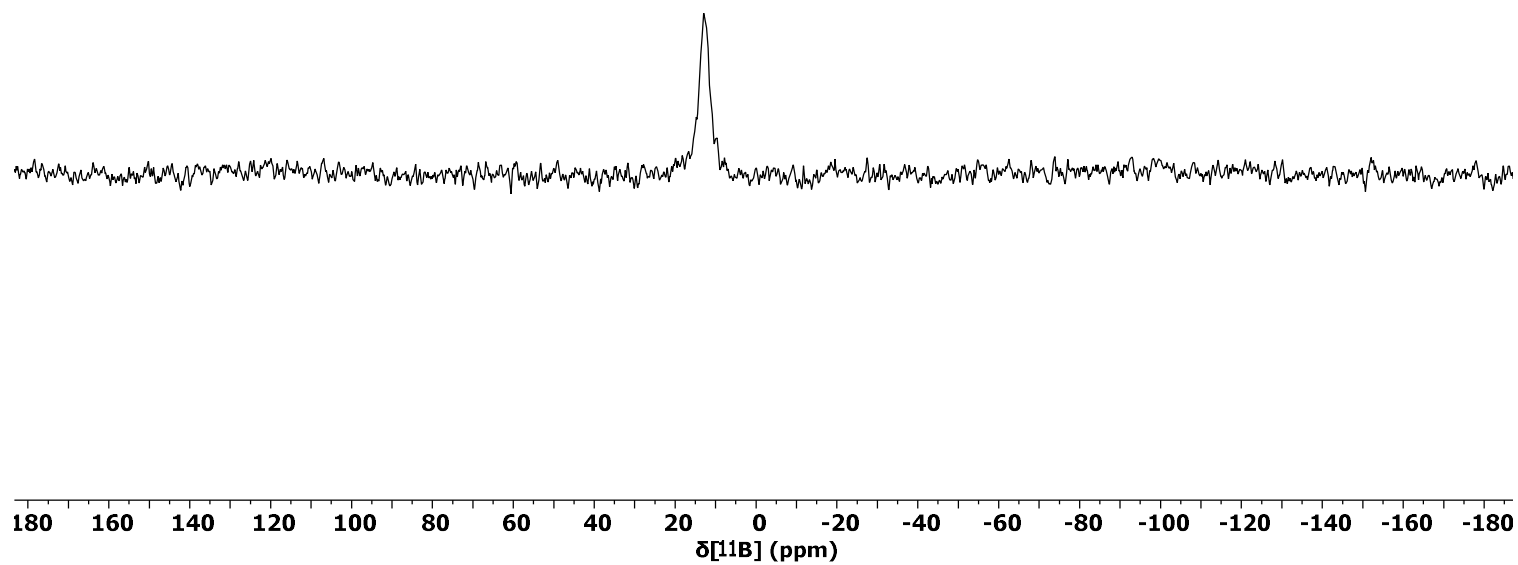

S171

$^1\text{H}$  NMR (400 MHz,  $\text{CDCl}_3$ )

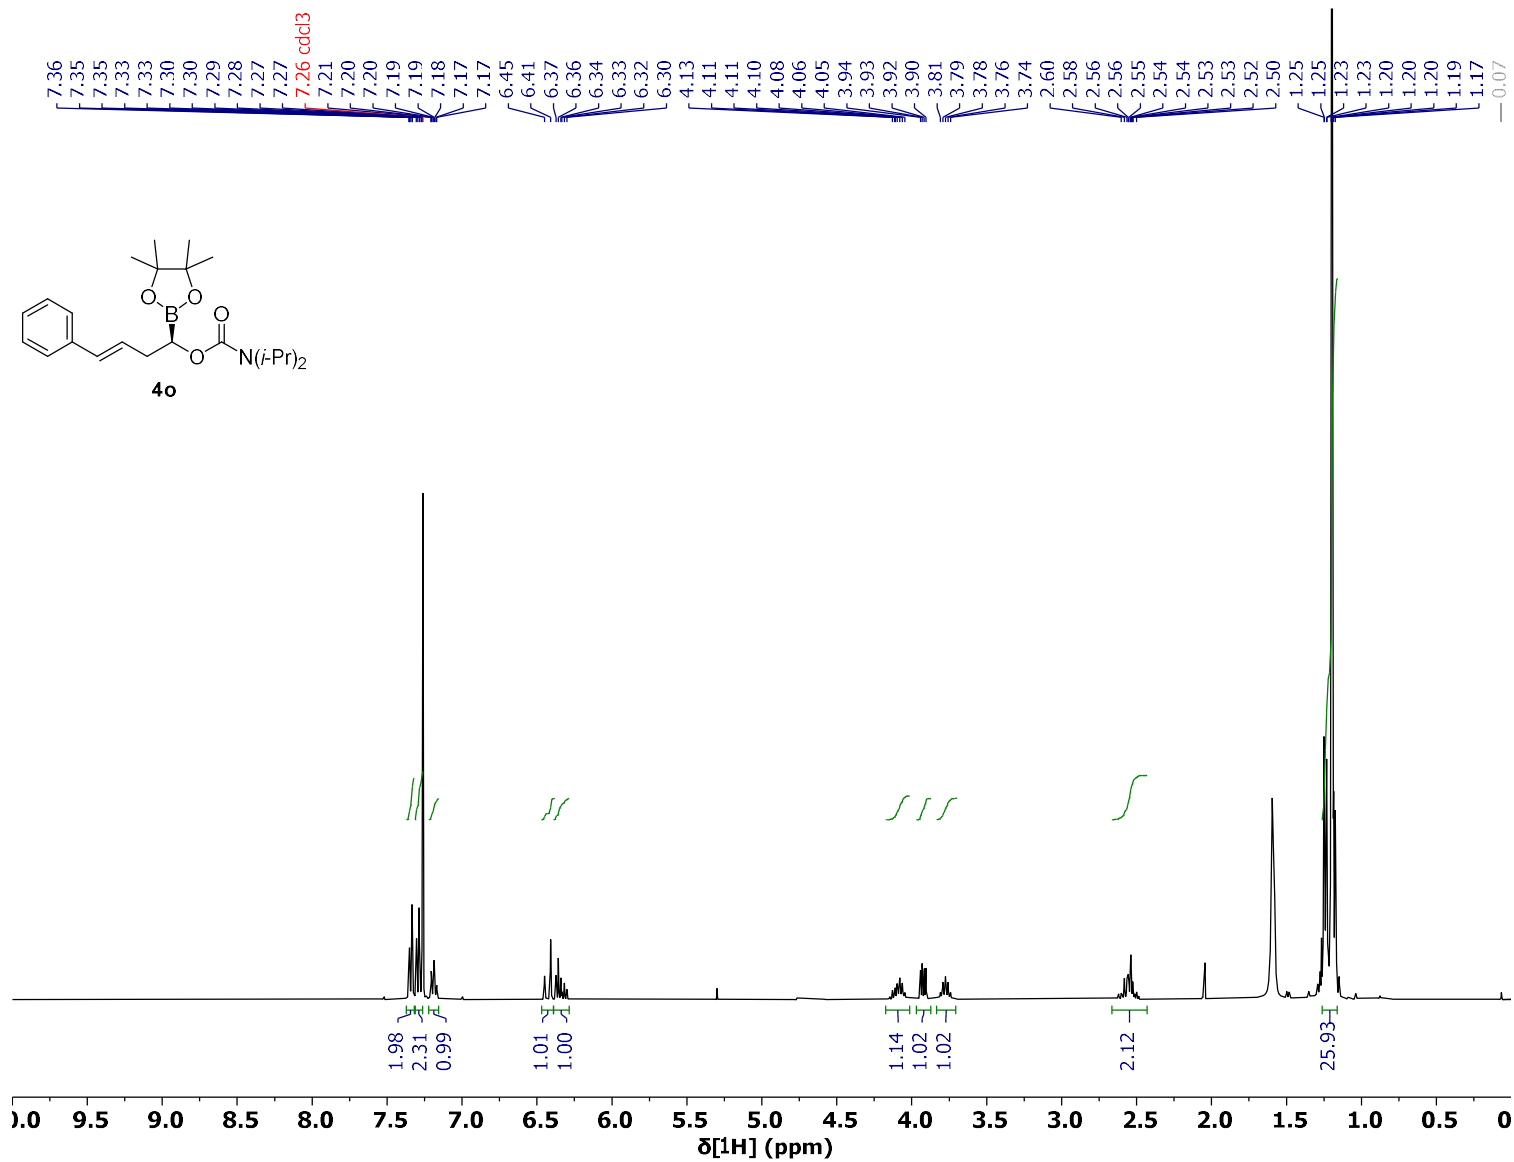

$^{13}\text{C}$  NMR (151 MHz,  $\text{CDCl}_3$ )

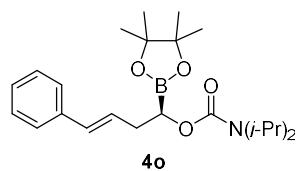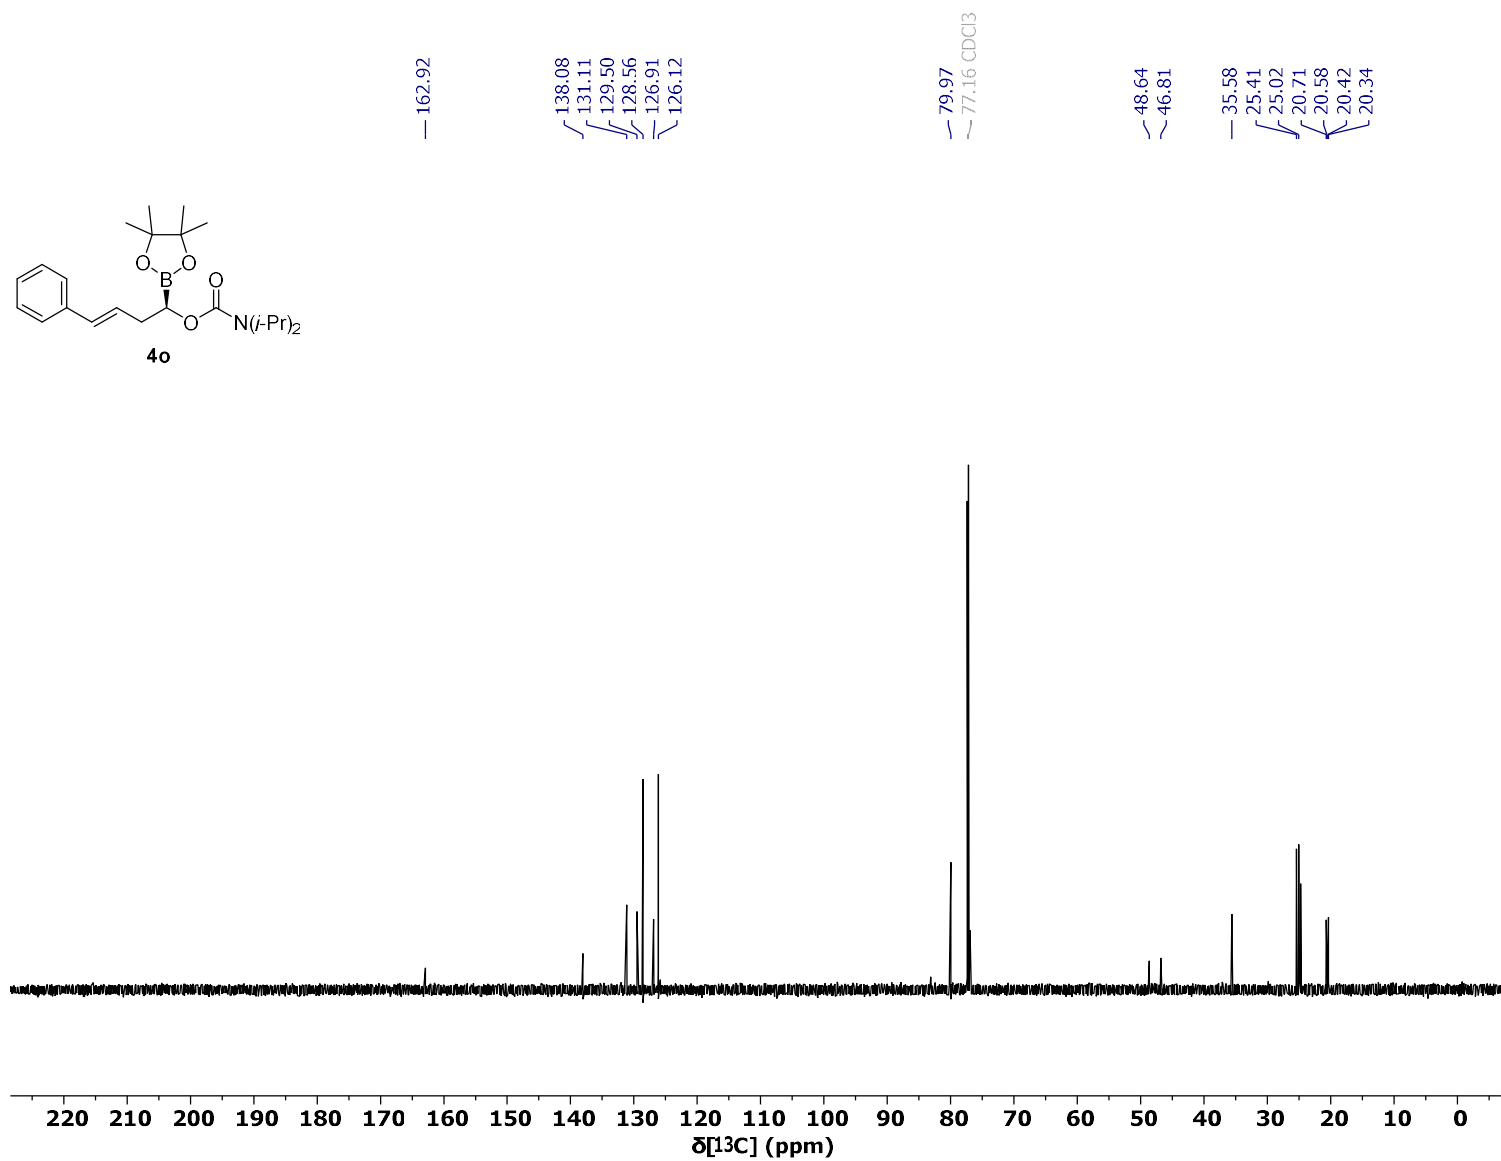

$^{11}\text{B}$  NMR (128 MHz,  $\text{CDCl}_3$ )

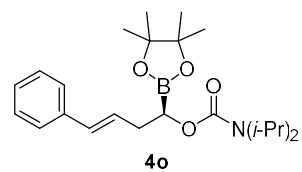

— 12.98

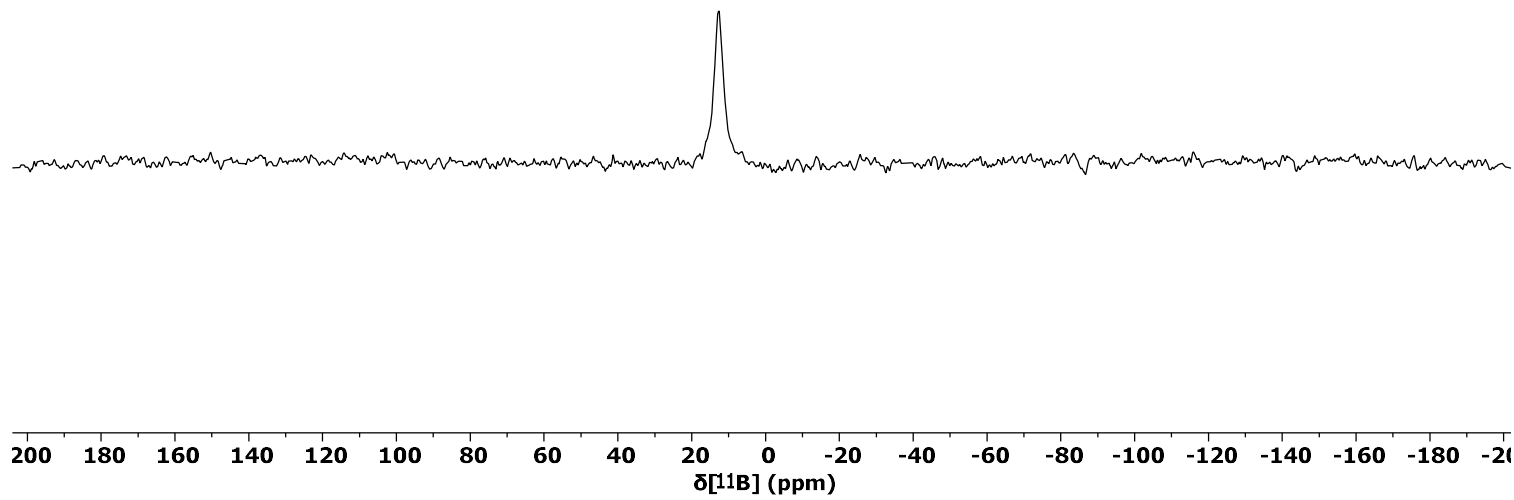

S174

<sup>1</sup>H NMR (400 MHz, CDCl<sub>3</sub>)

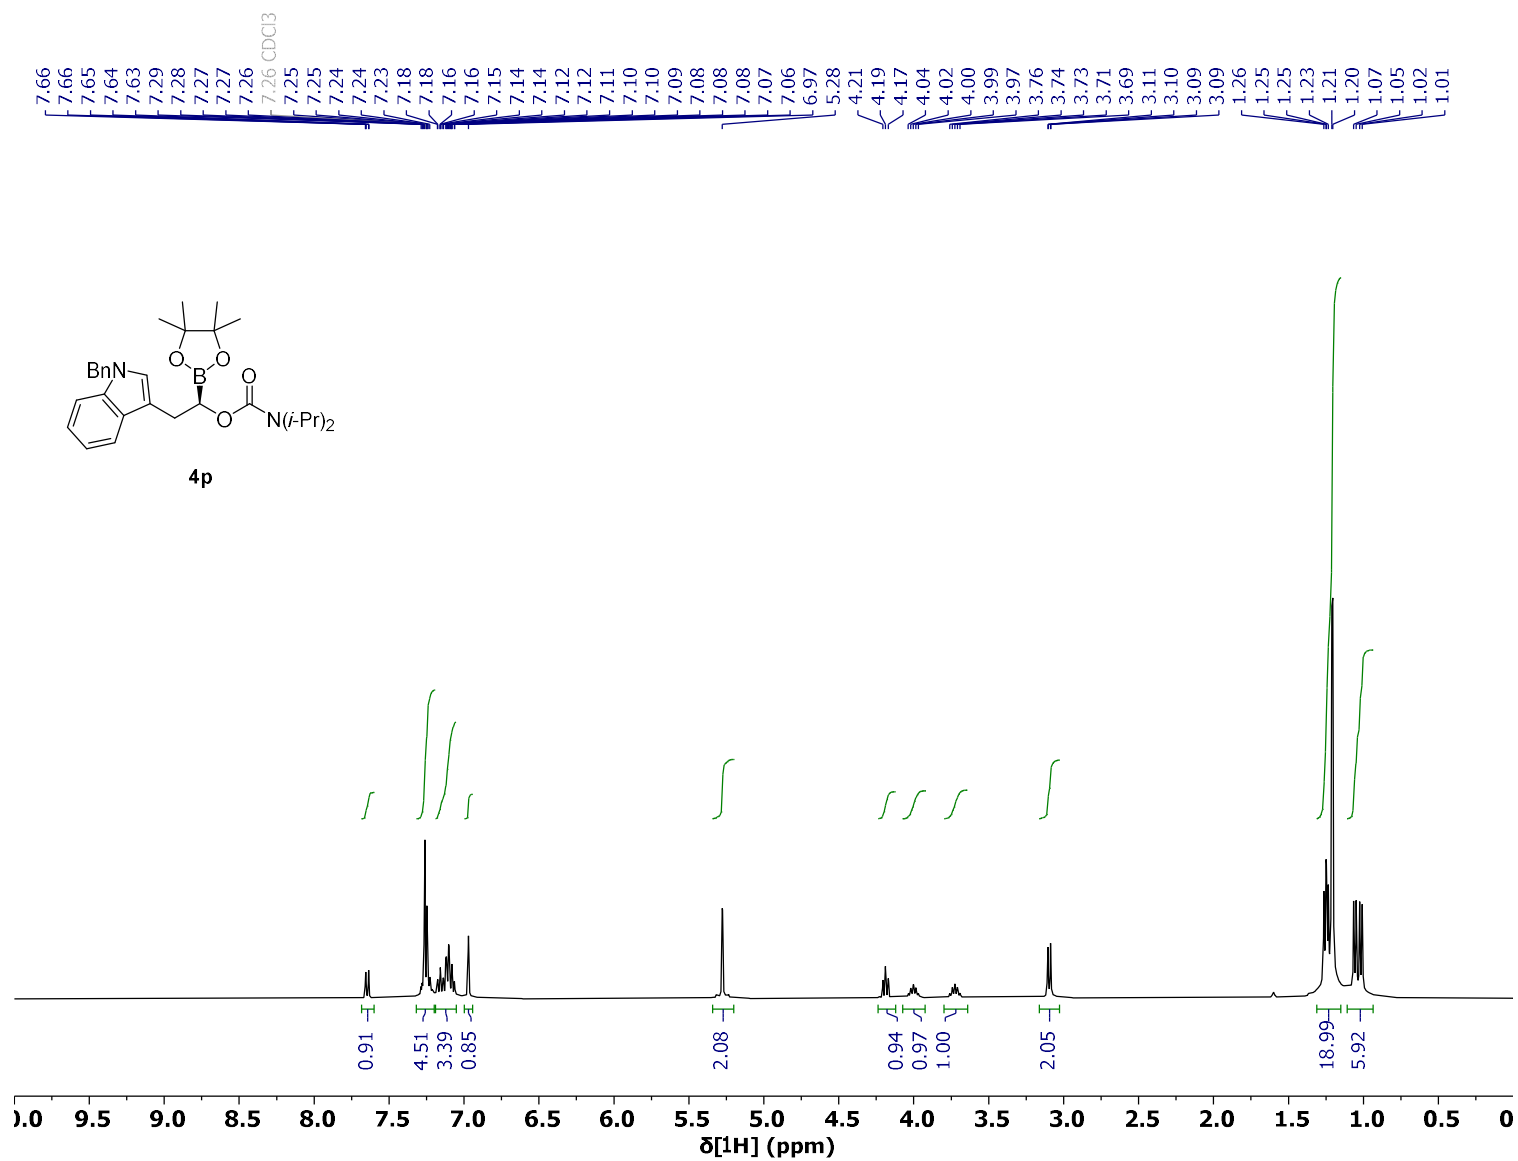

$^{13}\text{C}$  NMR (101 MHz,  $\text{CDCl}_3$ )

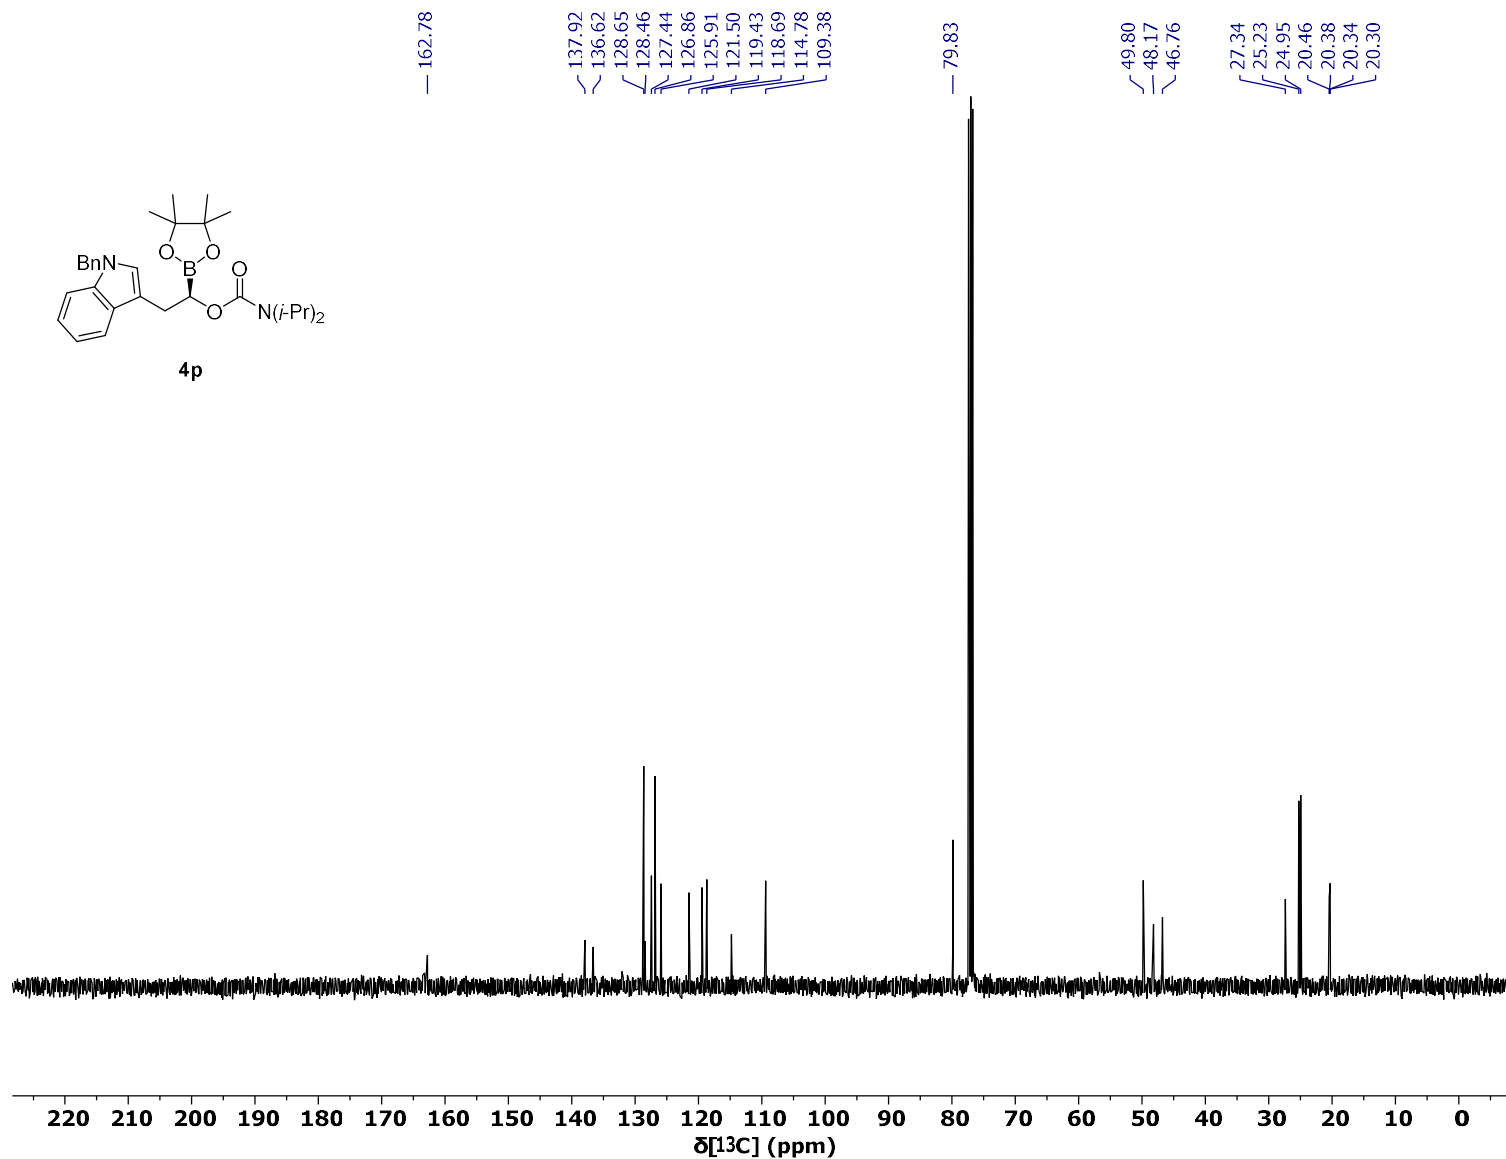



$^{11}\text{B}$  NMR (128 MHz,  $\text{CDCl}_3$ )

—12.64

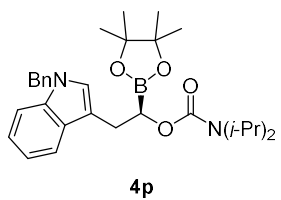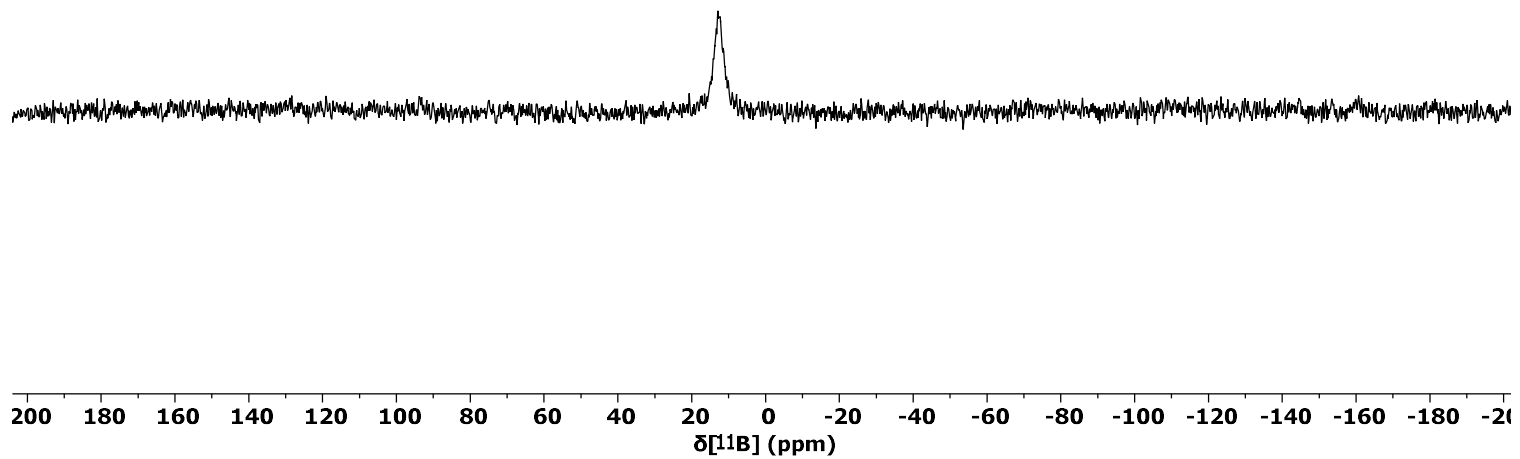

S177

<sup>1</sup>H NMR (600 MHz, CD<sub>3</sub>CN)

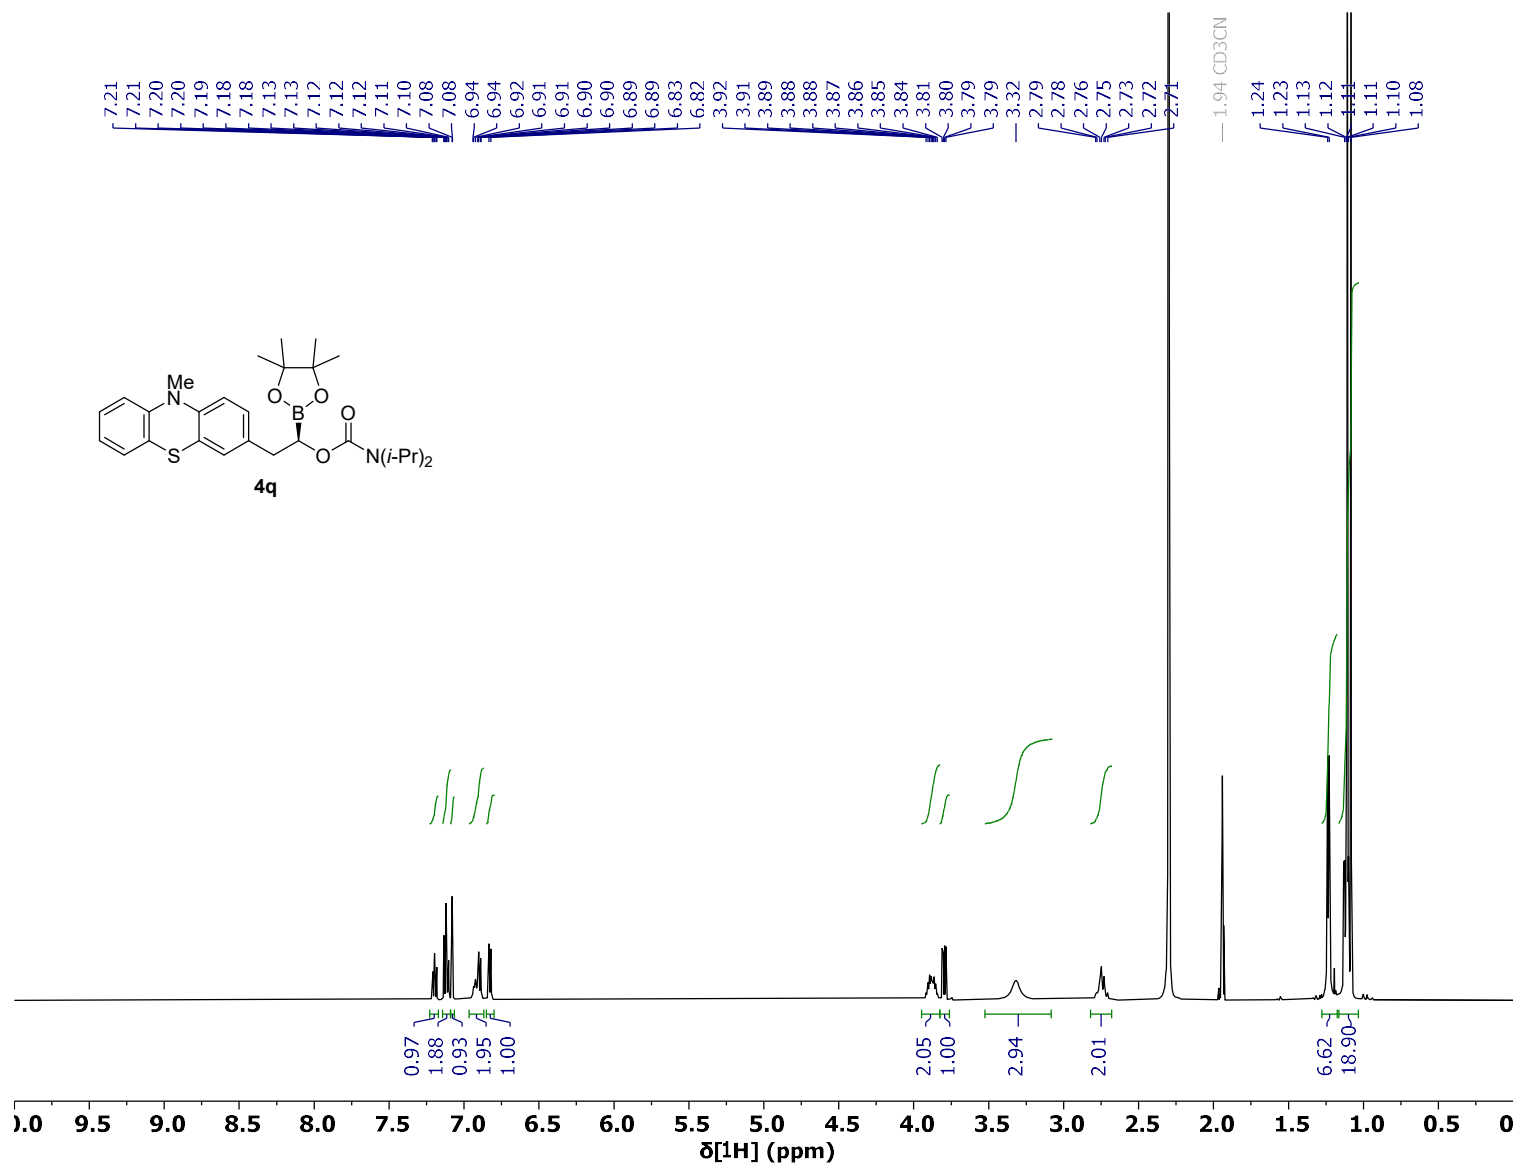

$^{13}\text{C}$  NMR (151 MHz,  $\text{CD}_3\text{CN}$ )

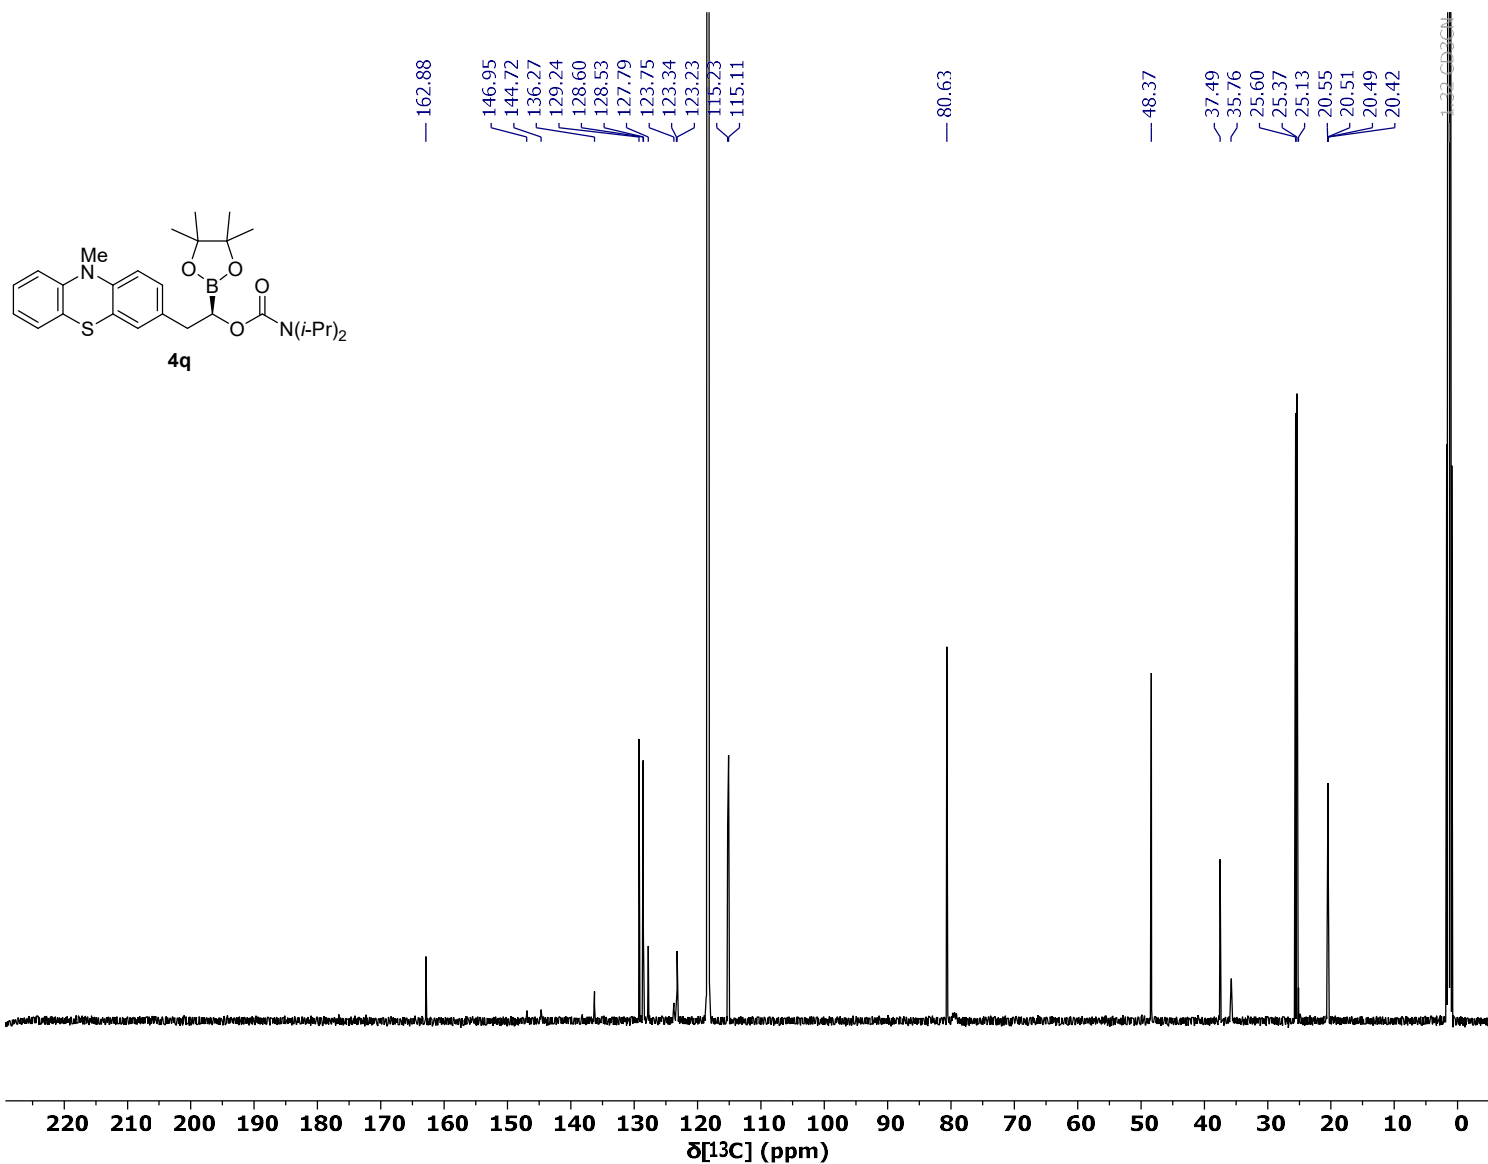

$^{11}\text{B}$  NMR (128 MHz,  $\text{CDCl}_3$ )

— 12.53

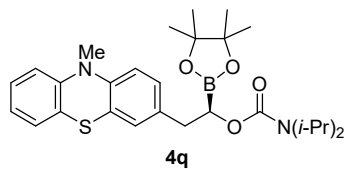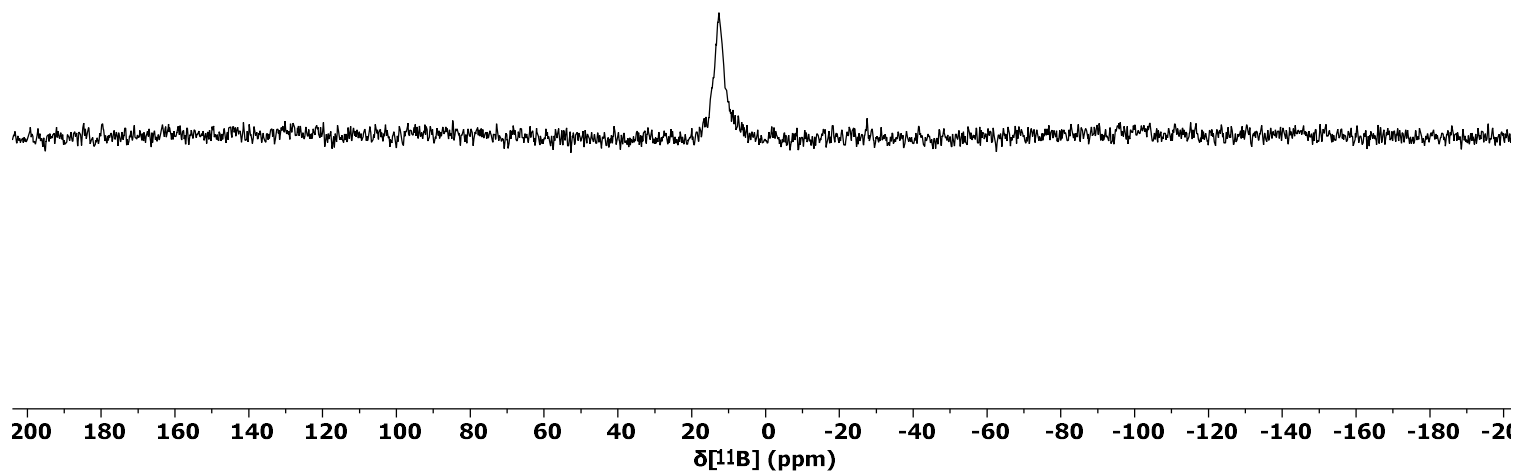

S180

<sup>1</sup>H NMR (400 MHz, CDCl<sub>3</sub>)

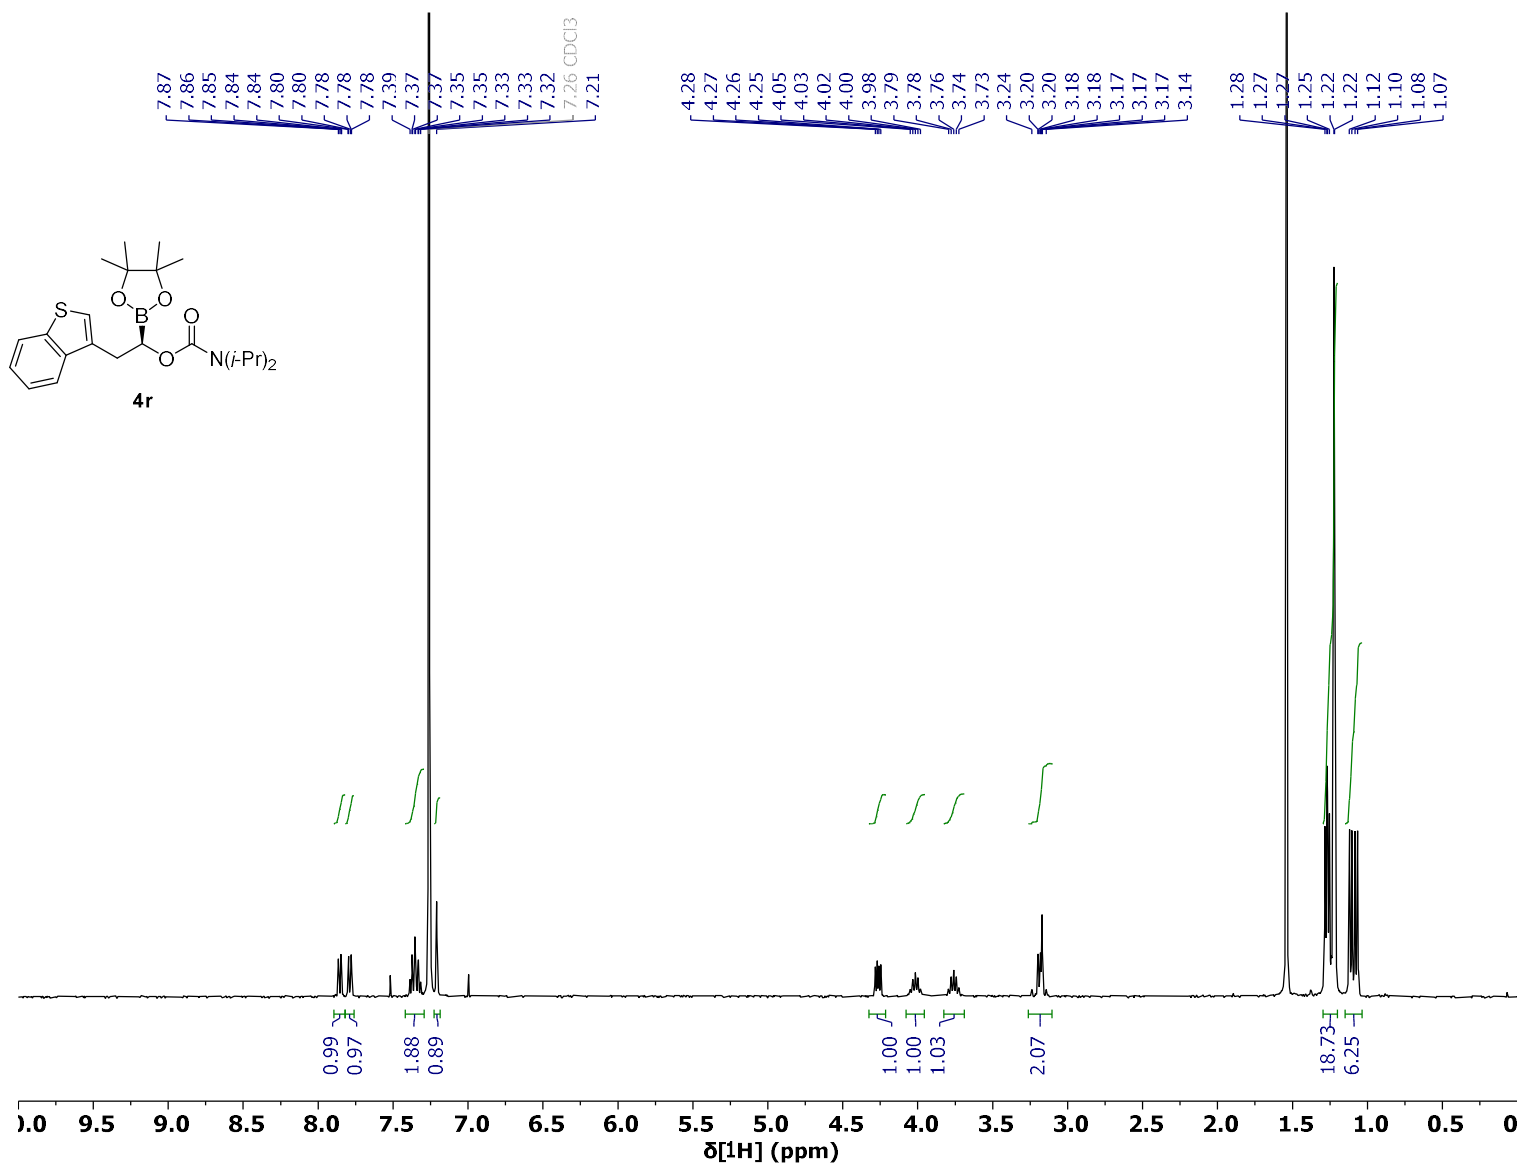

$^{13}\text{C}$  NMR (151 MHz,  $\text{CDCl}_3$ )

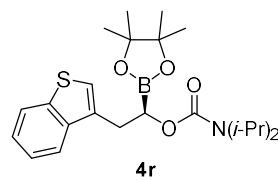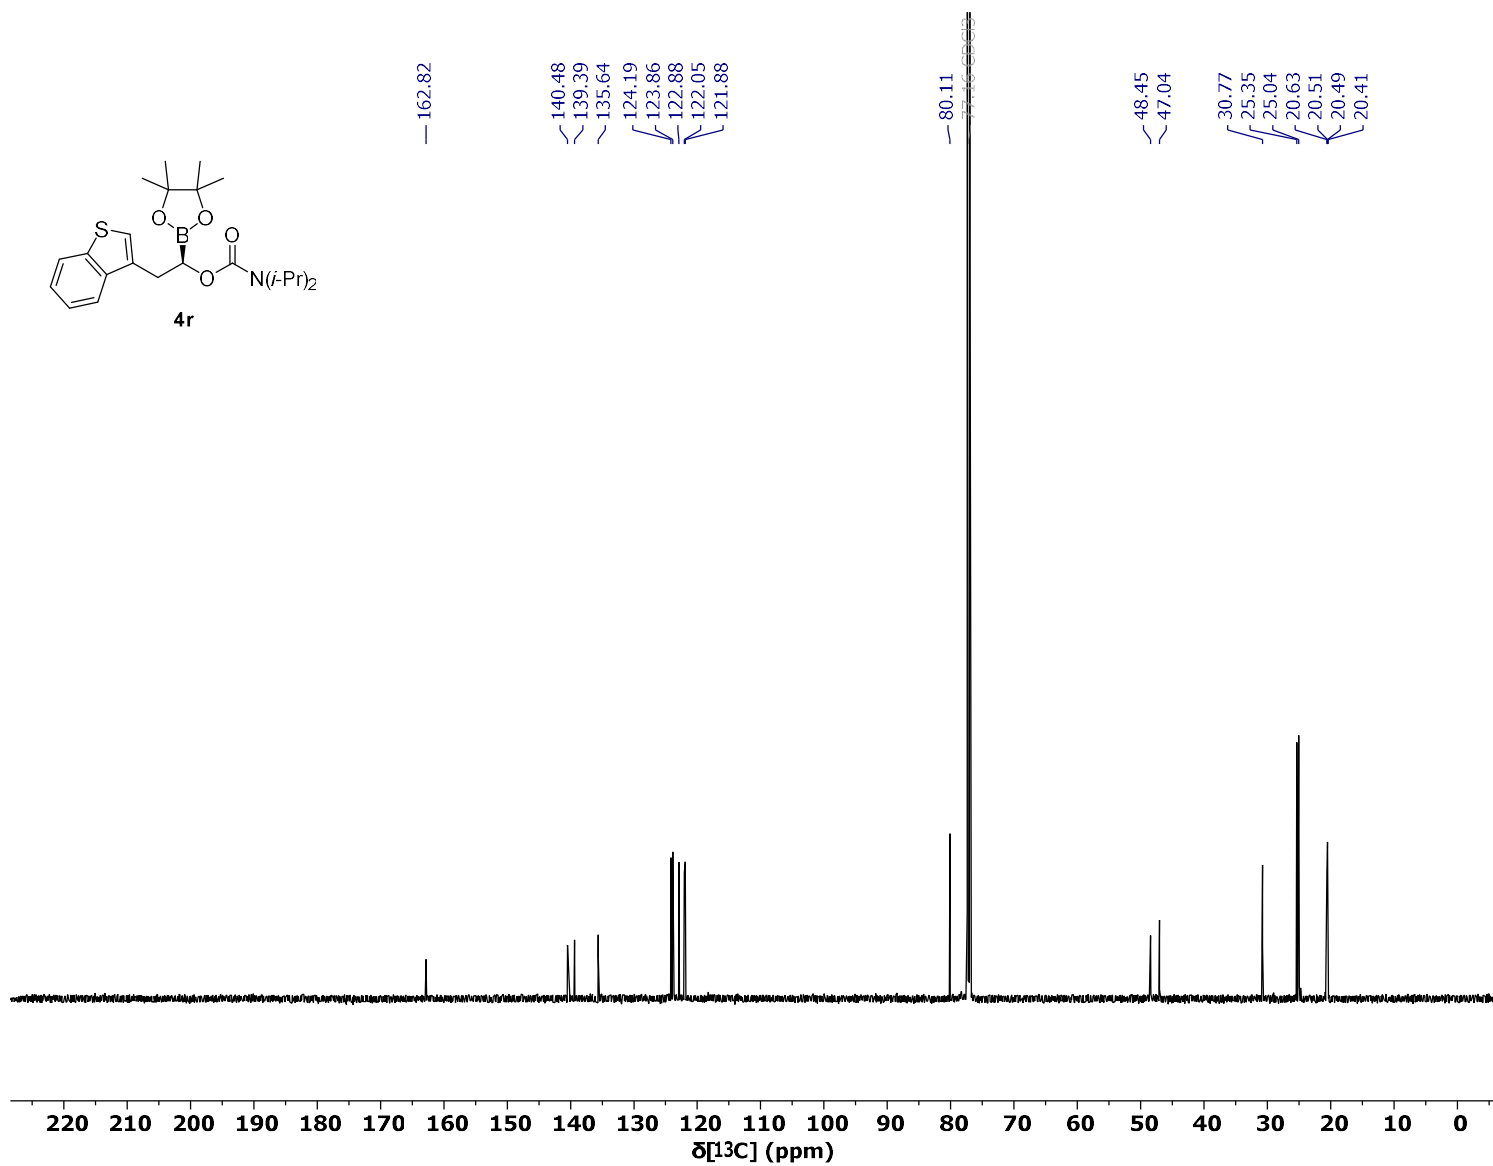

$^{11}\text{B}$  NMR (128 MHz,  $\text{CDCl}_3$ )

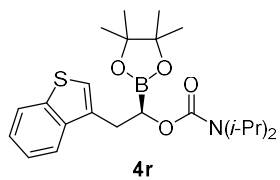

— 12.68

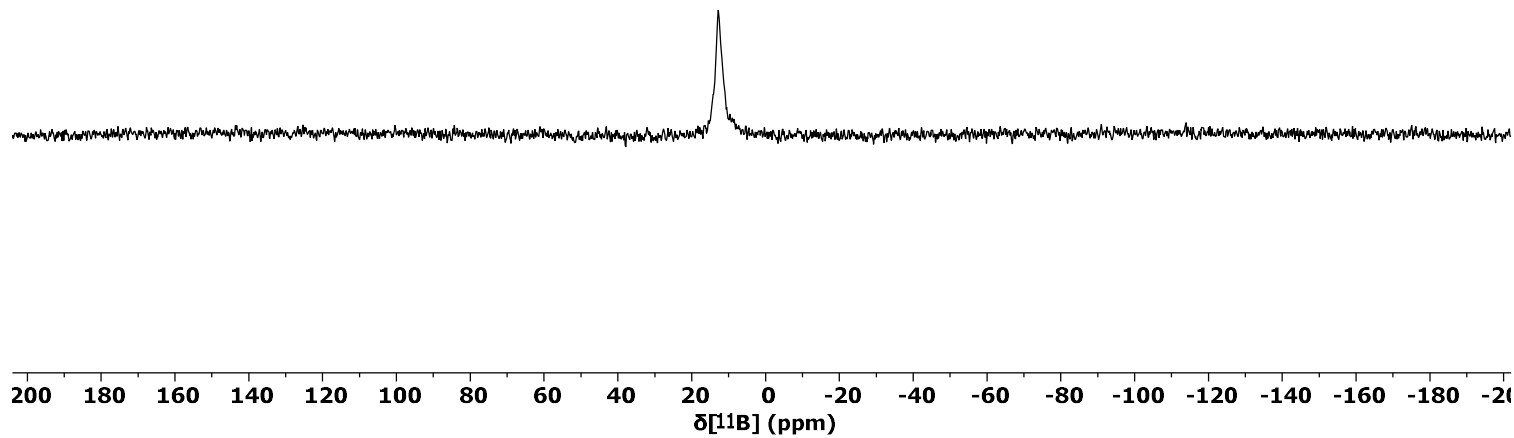

S183

$^1\text{H}$  NMR (400 MHz,  $\text{CDCl}_3$ )

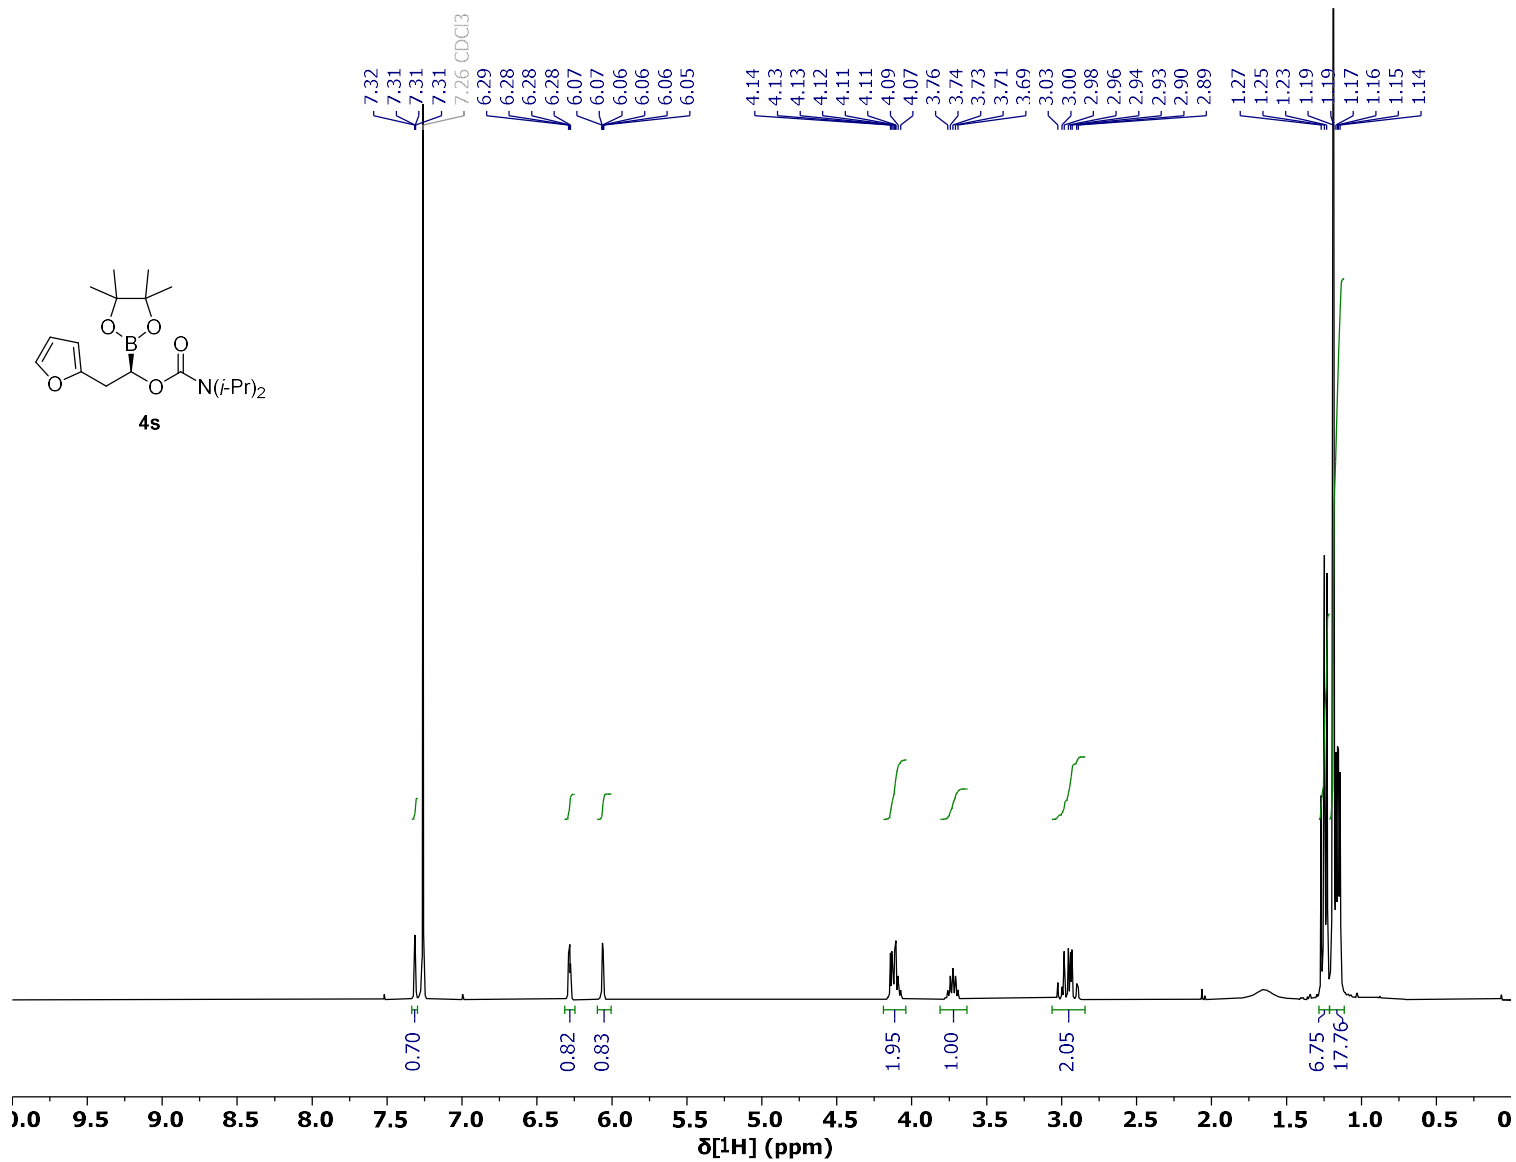



$^{13}\text{C}$  NMR (151 MHz,  $\text{CDCl}_3$ )

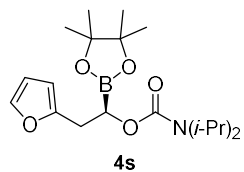

— 162.93  
— 155.39  
— 140.93  
  
— 110.21  
— 105.53  
  
— 80.03  
— 77.16  $\text{CDCl}_3$   
  
— 48.80  
— 46.79  
  
30.55  
25.31  
24.96  
20.66  
20.47  
20.39  
20.30

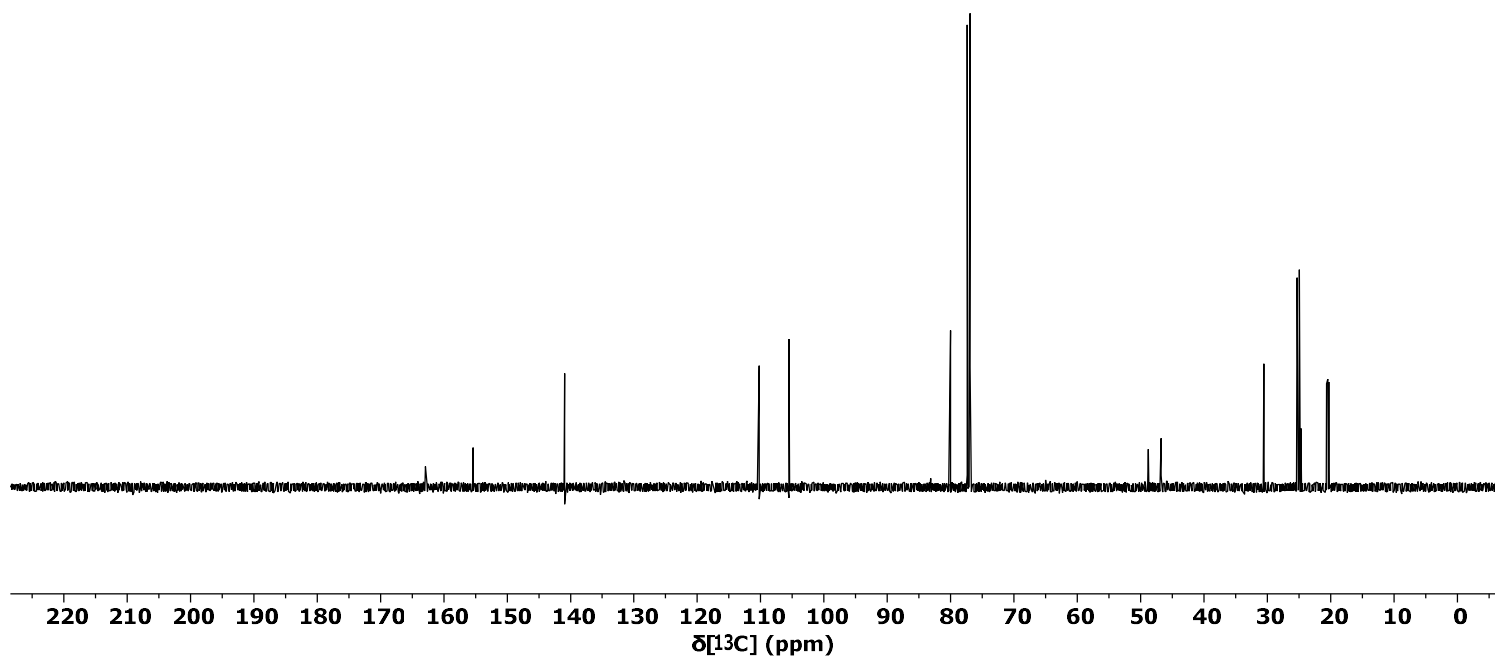

$^{11}\text{B}$  NMR (128 MHz,  $\text{CDCl}_3$ )

— 12.57

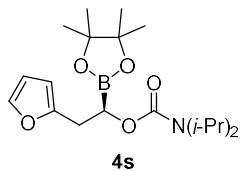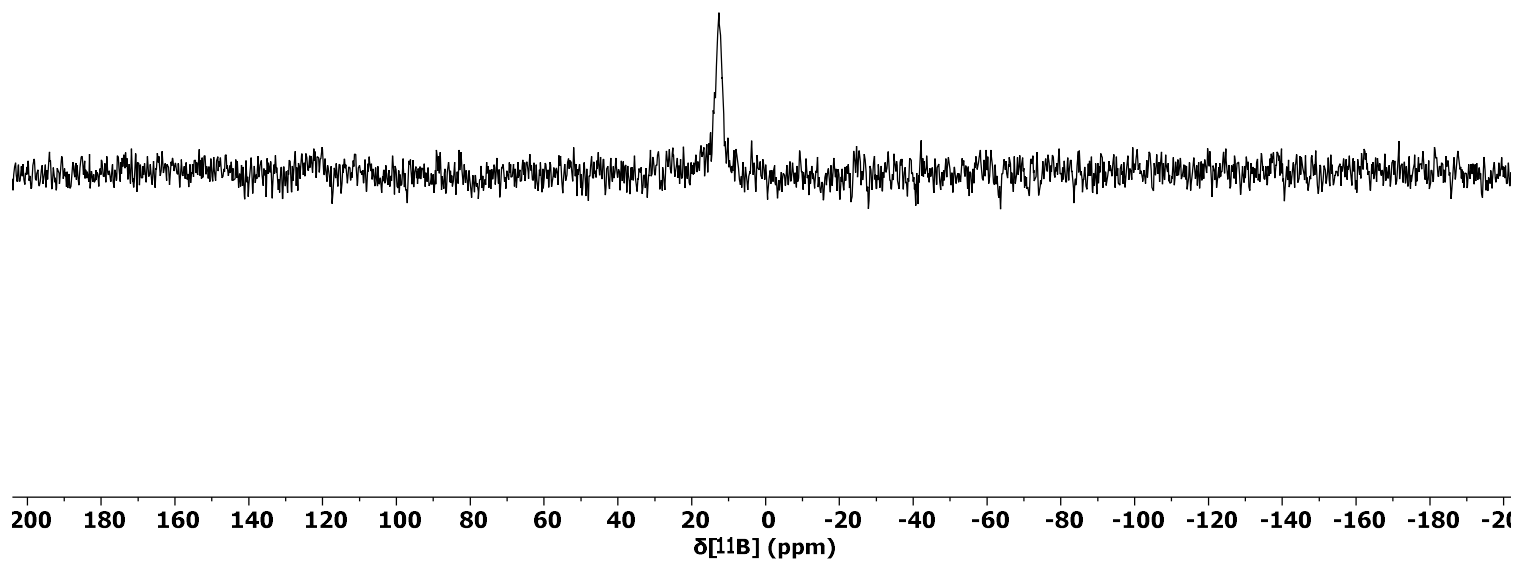

S186





$^{11}\text{B}$  NMR (128 MHz,  $\text{CDCl}_3$ )

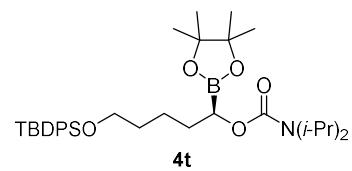

— 13.00

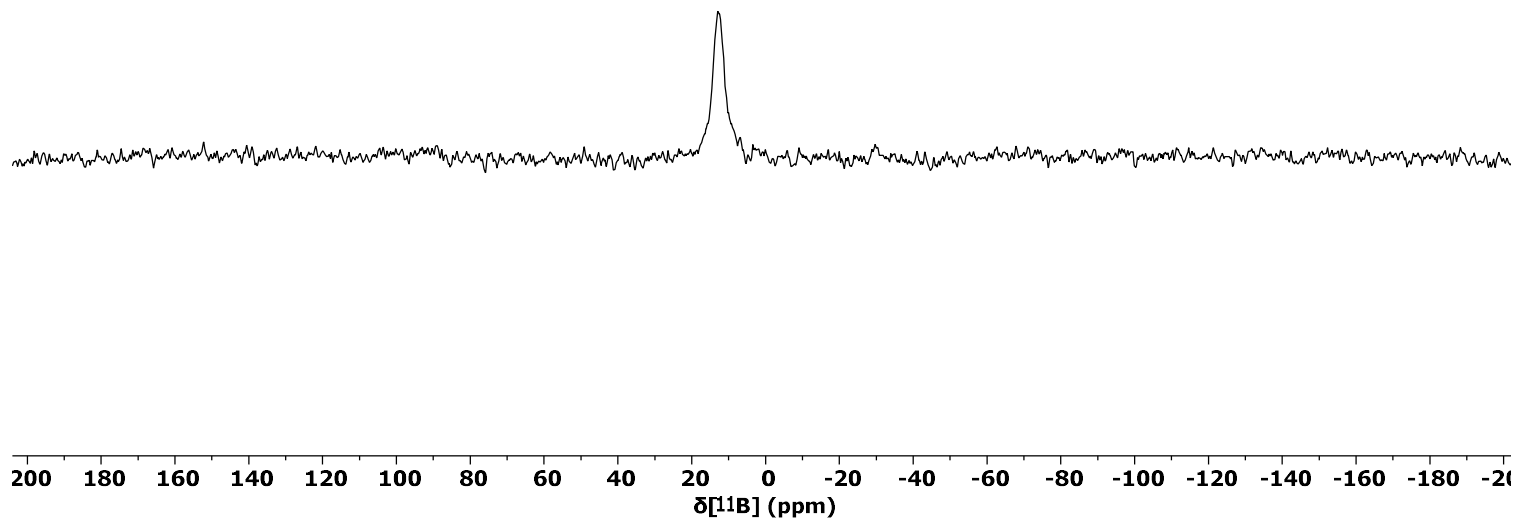

S189

<sup>1</sup>H NMR (400 MHz, CDCl<sub>3</sub>)

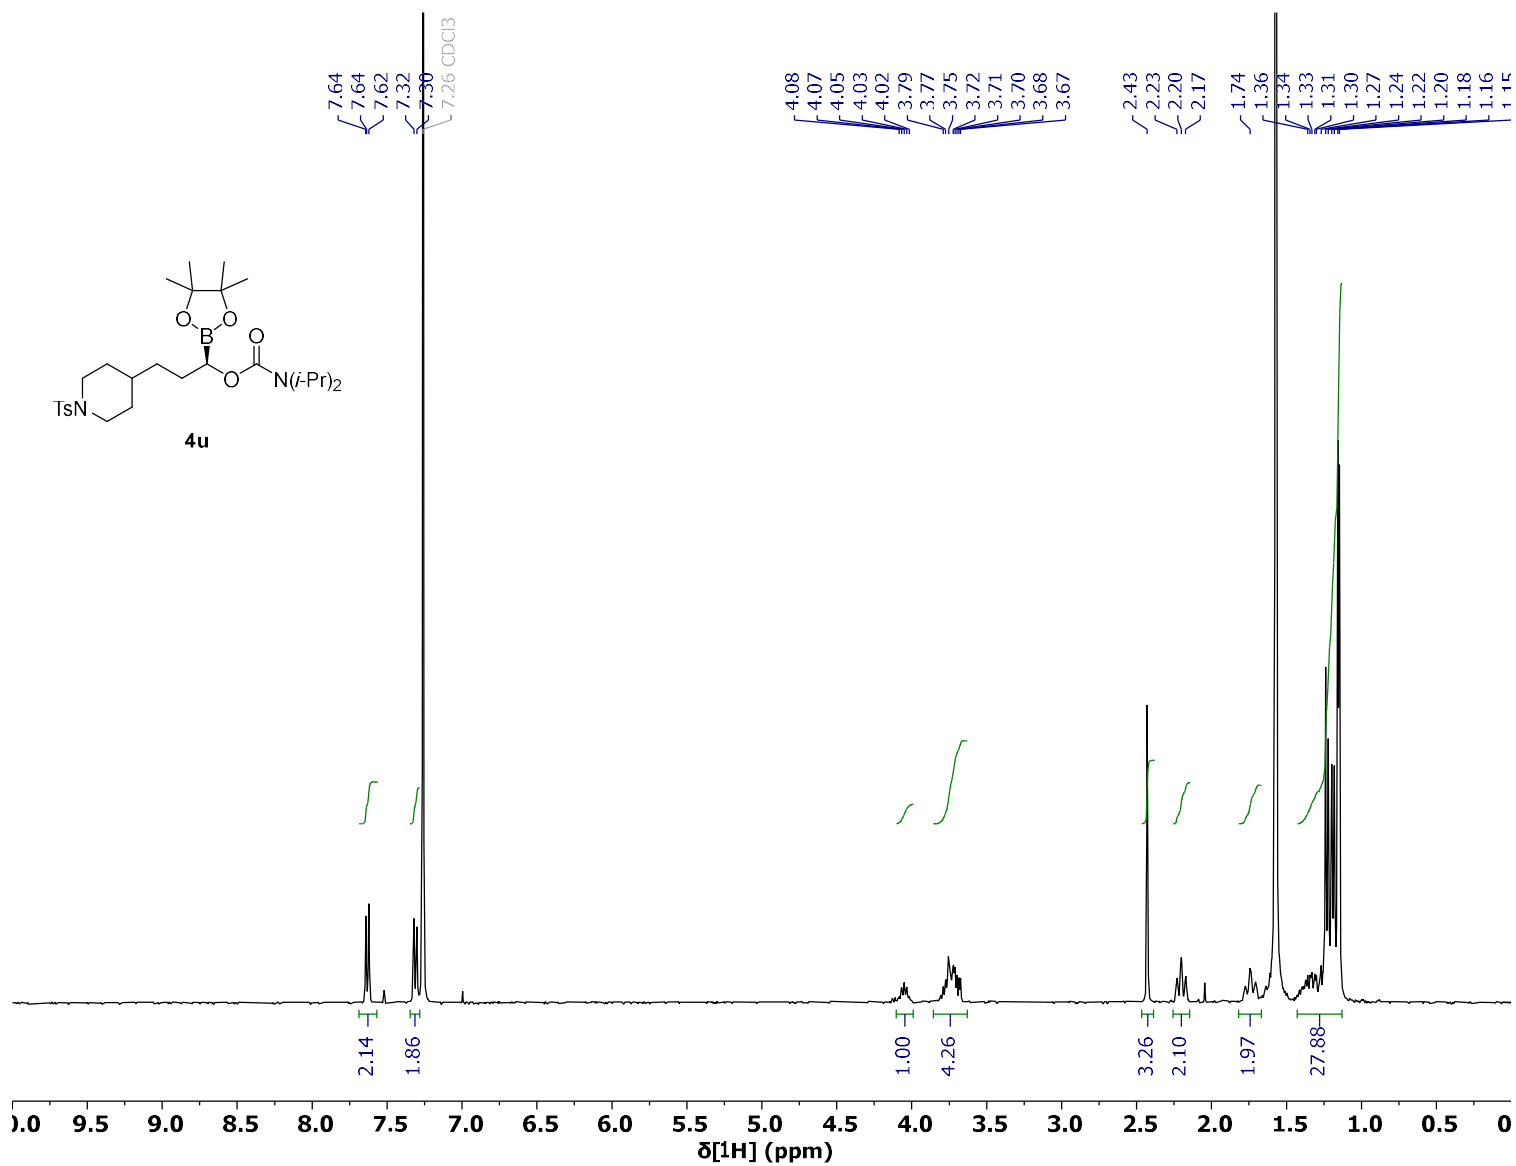

$^{13}\text{C}$  NMR (151 MHz,  $\text{CDCl}_3$ )

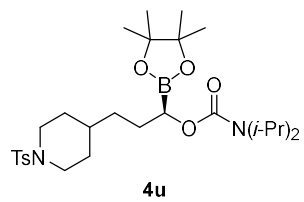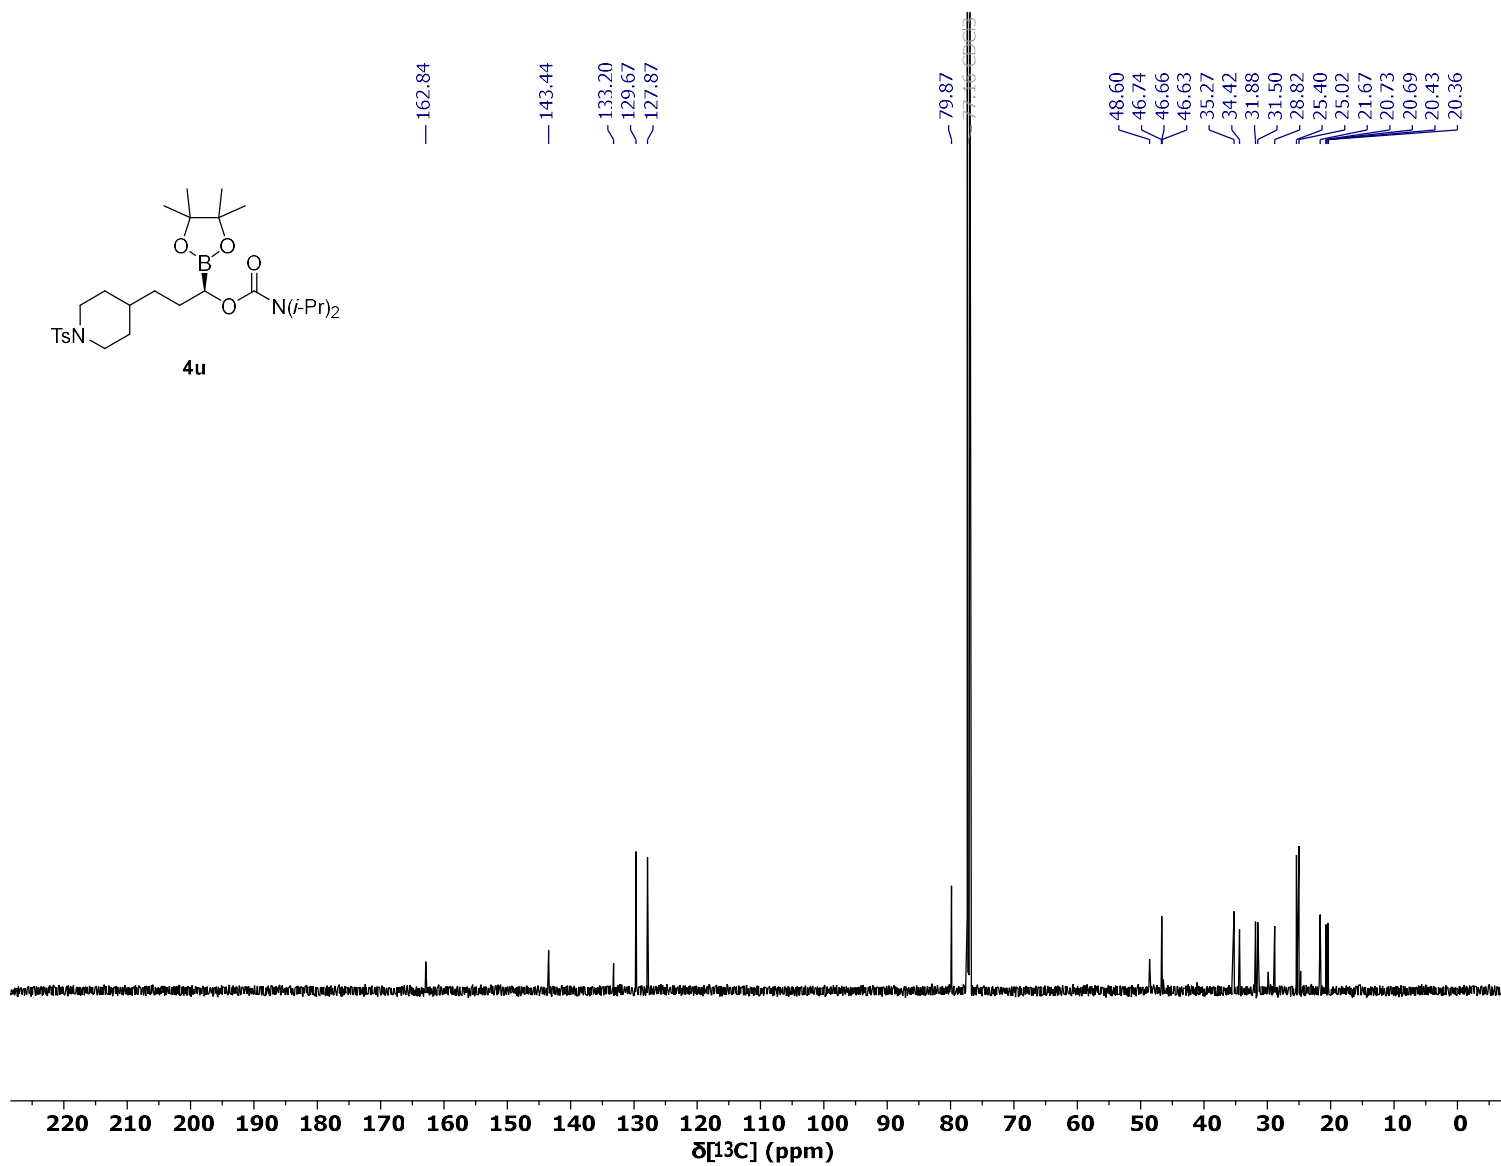

$^{11}\text{B}$  NMR (128 MHz,  $\text{CDCl}_3$ )

— 12.98

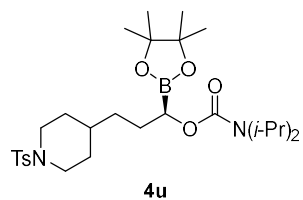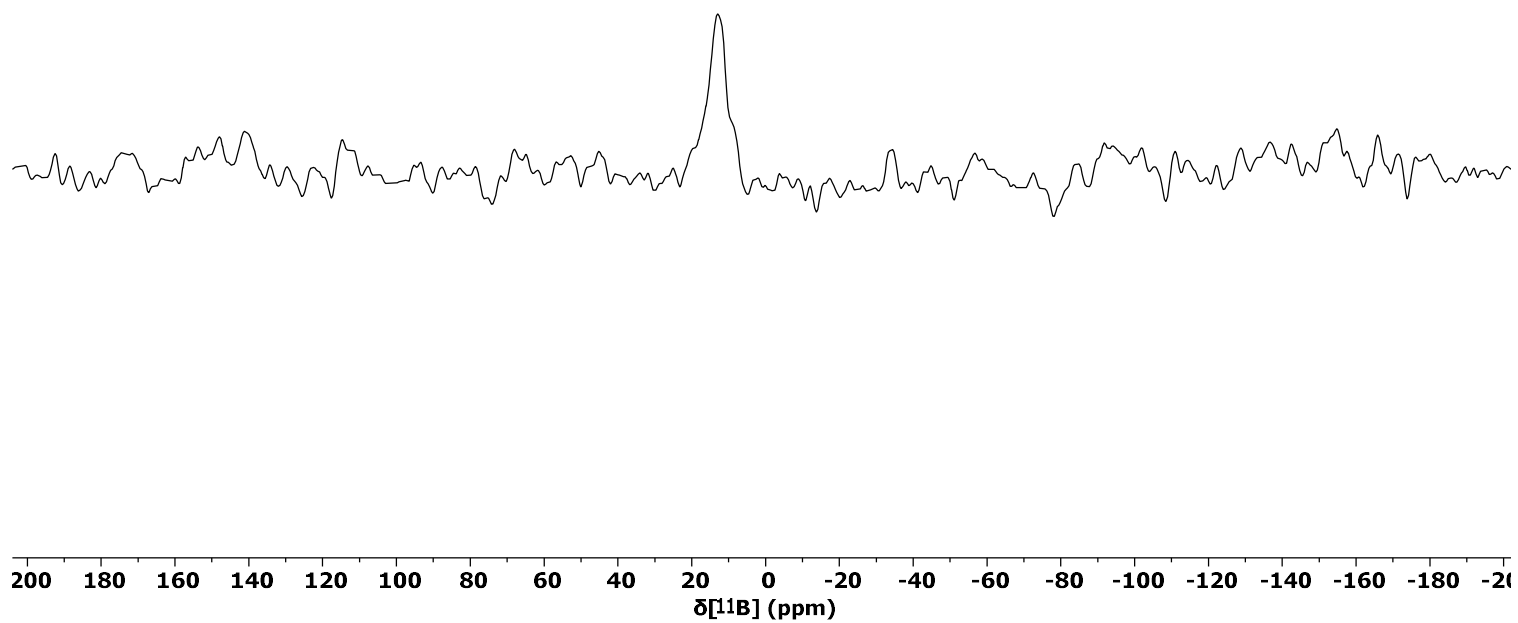

S192



<sup>1</sup>H NMR (400 MHz, CDCl<sub>3</sub>)

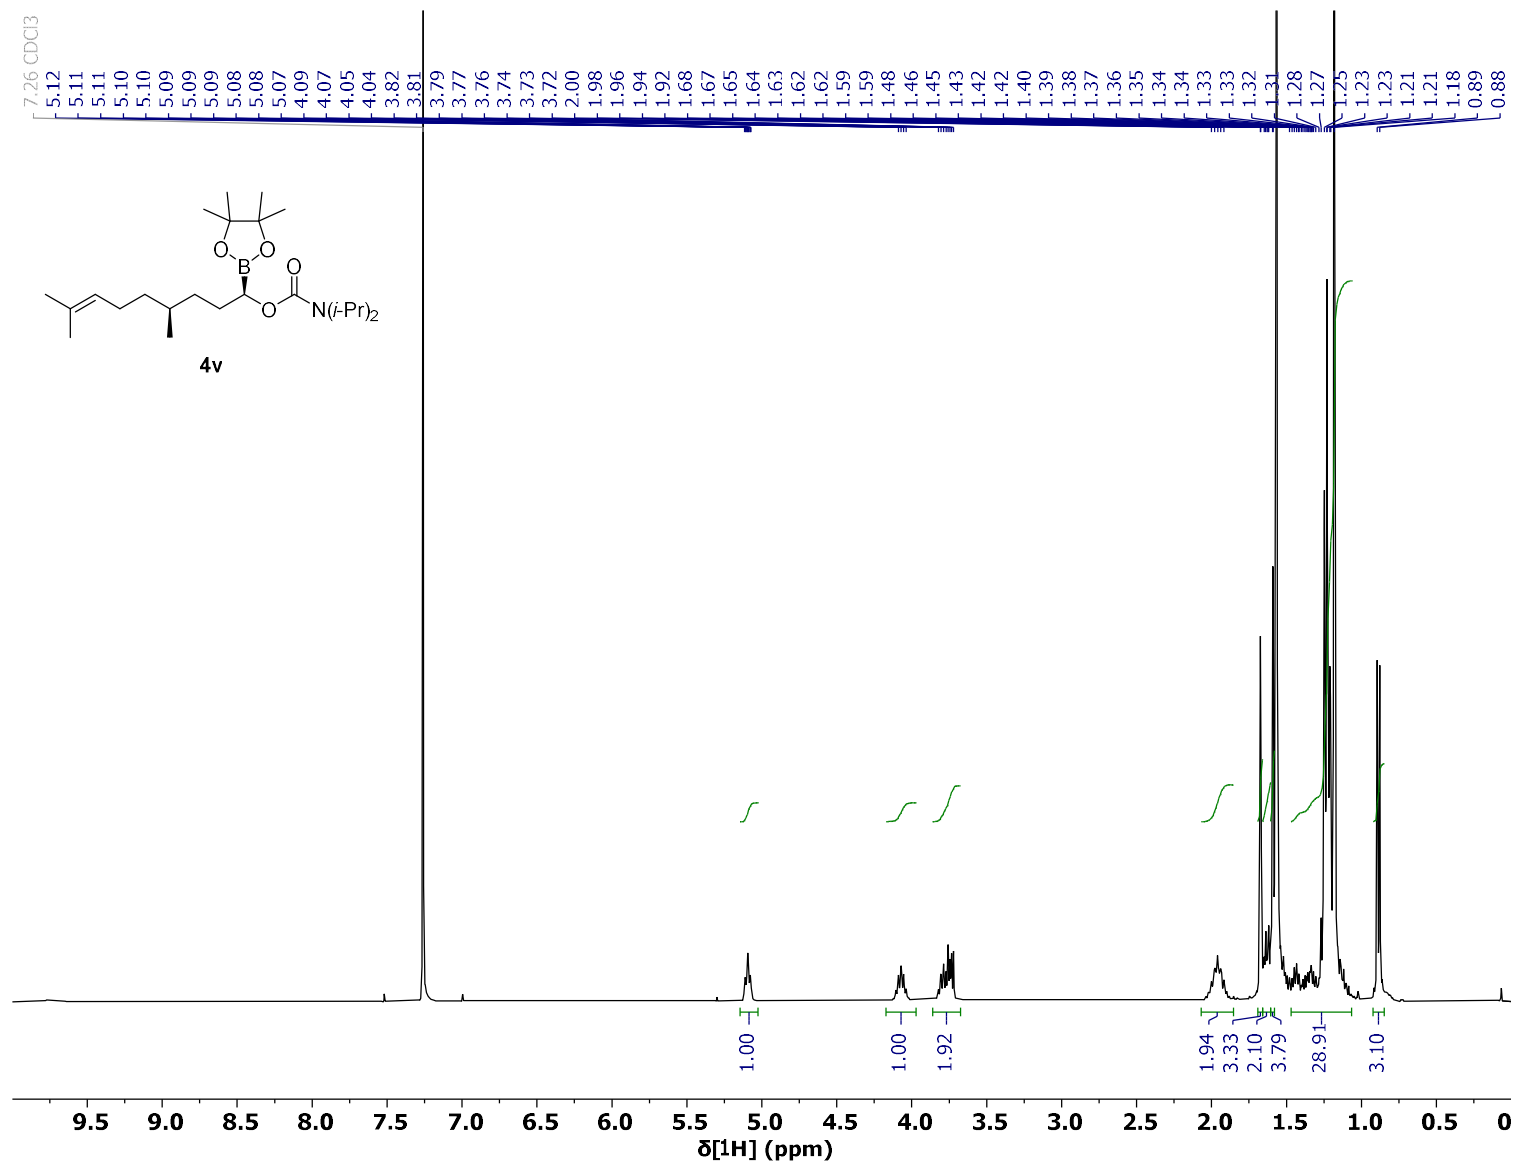

$^{13}\text{C}$  NMR (151 MHz,  $\text{CDCl}_3$ )

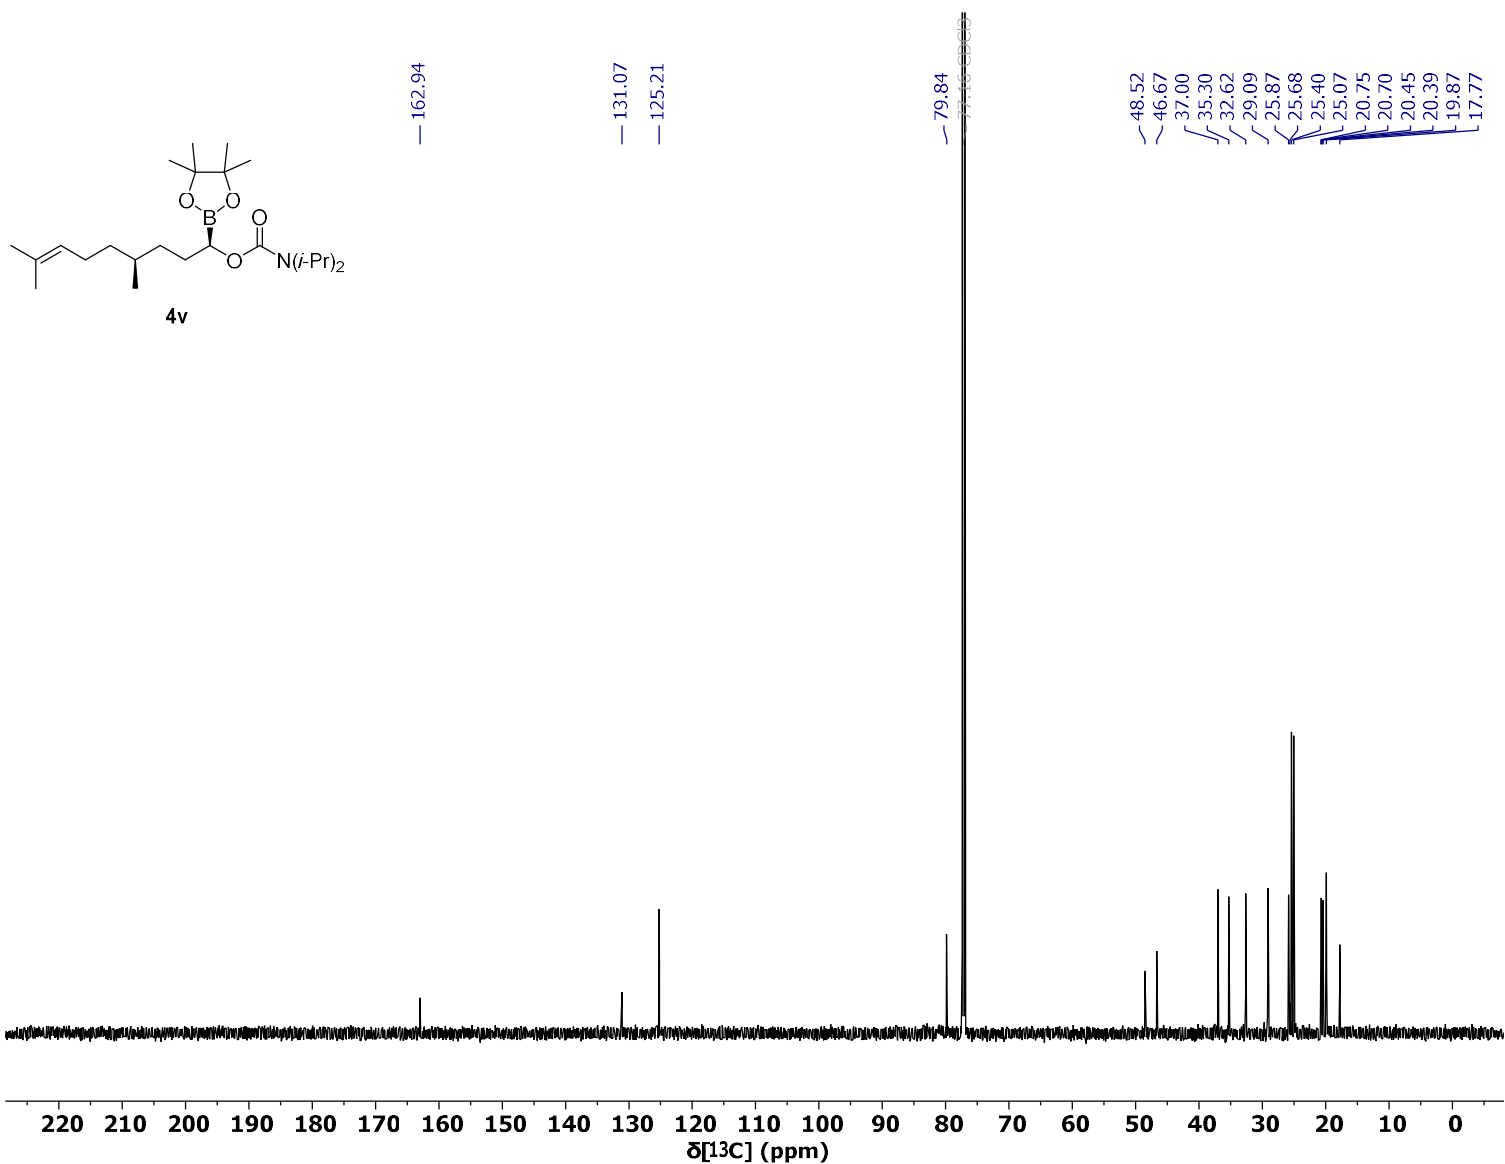

<sup>13</sup>C NMR (151 MHz, CDCl<sub>3</sub>)

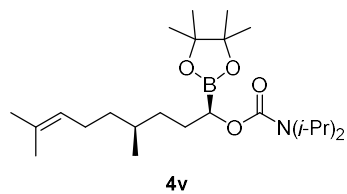

|                   | major  | major %    | minor | minor %   |
|-------------------|--------|------------|-------|-----------|
|                   | 113.53 | 92%        | 9.37  | 8%        |
|                   | 100    | 91%        | 10.02 | 9%        |
|                   | 108.23 | 92%        | 9.12  | 8%        |
| <b>average dr</b> |        | <b>92%</b> |       | <b>8%</b> |

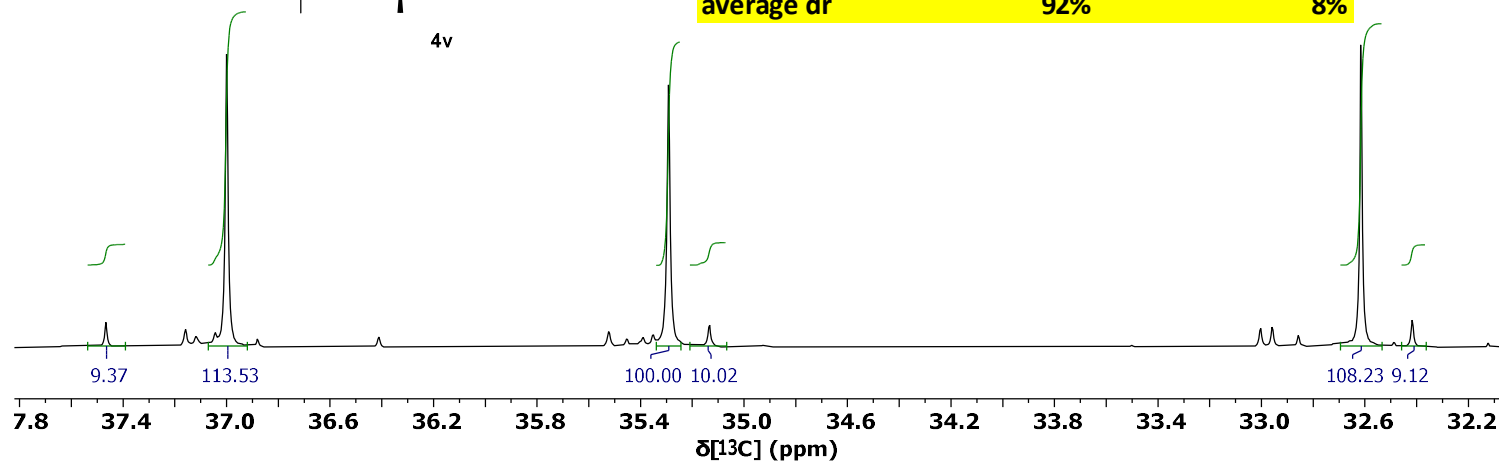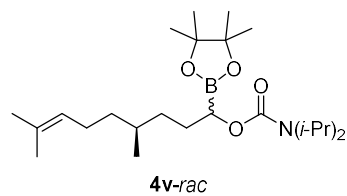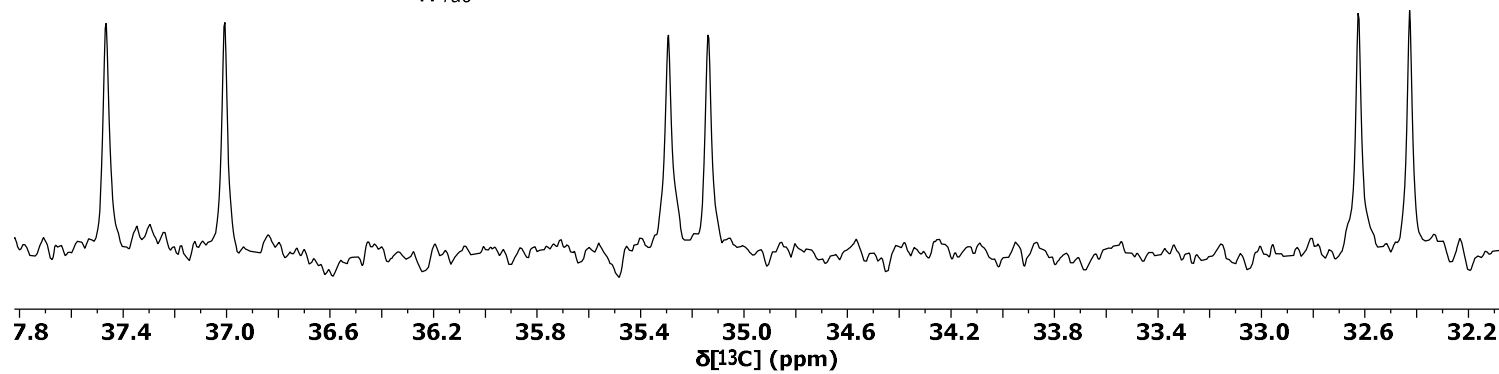

**$^{11}\text{B}$  NMR** (128 MHz,  $\text{CDCl}_3$ )

—12.59

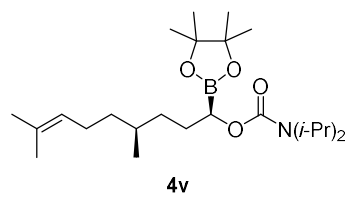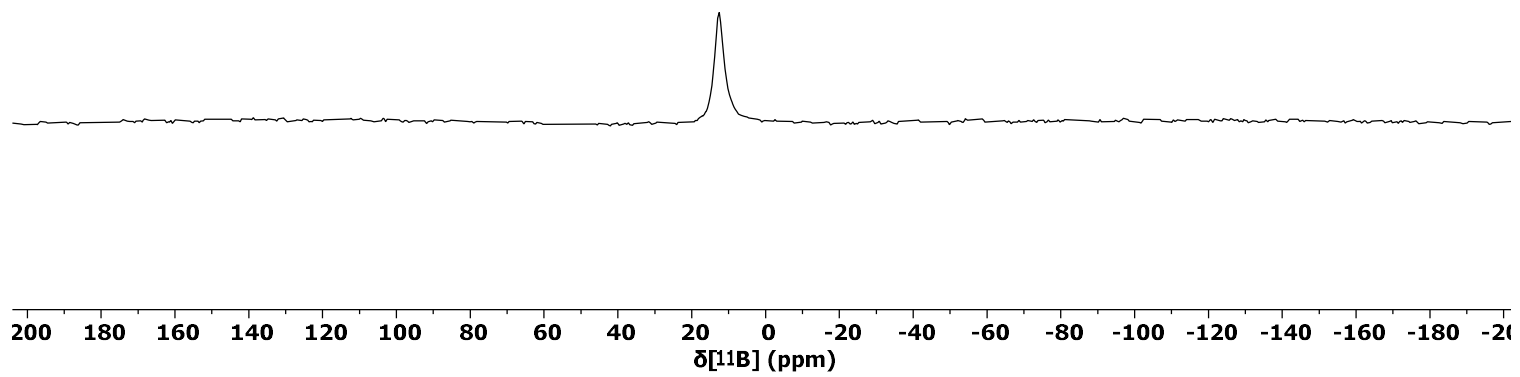

<sup>1</sup>H NMR (400 MHz, CDCl<sub>3</sub>)

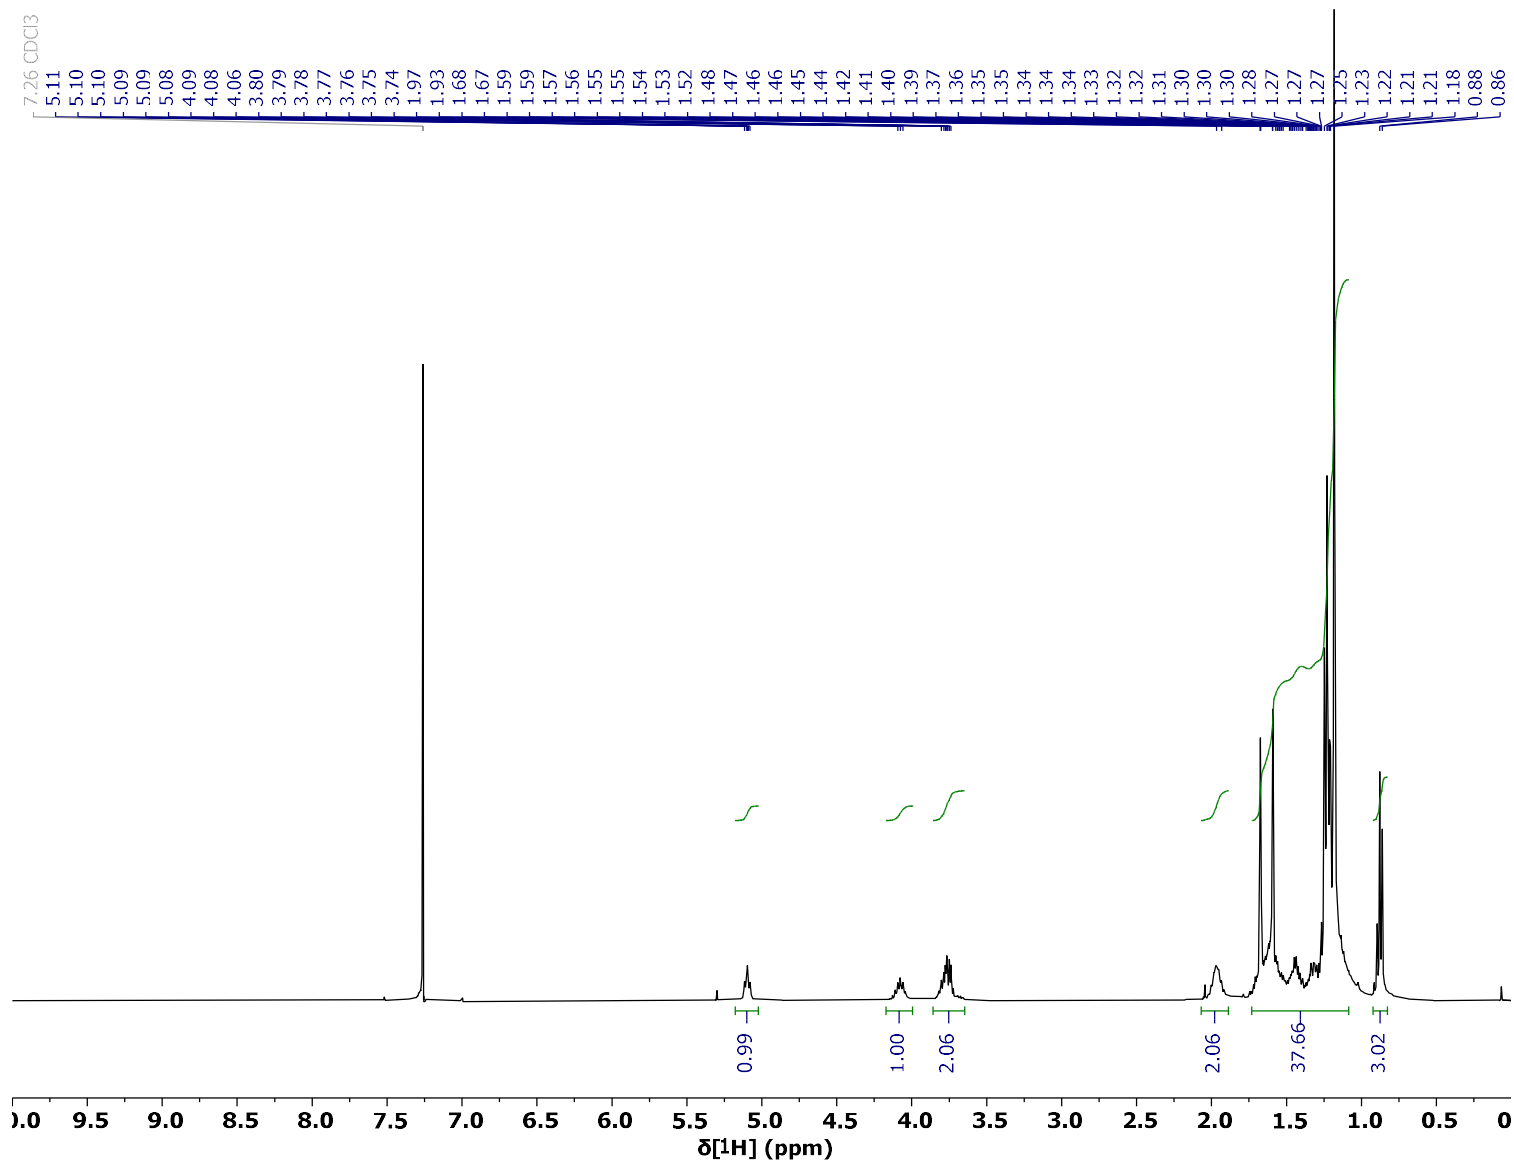

<sup>13</sup>C NMR (151 MHz, CDCl<sub>3</sub>)

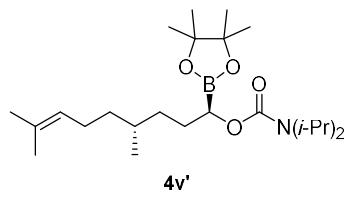

— 162.89

— 131.00

— 125.11

— 79.72  
— 77.16 CDCl<sub>3</sub>

— 48.46  
— 46.59  
— 37.39  
— 35.06  
— 32.34  
— 28.99  
— 25.79  
— 25.69  
— 25.32  
— 24.99  
— 20.68  
— 20.63  
— 20.38  
— 20.31  
— 19.60  
— 17.70

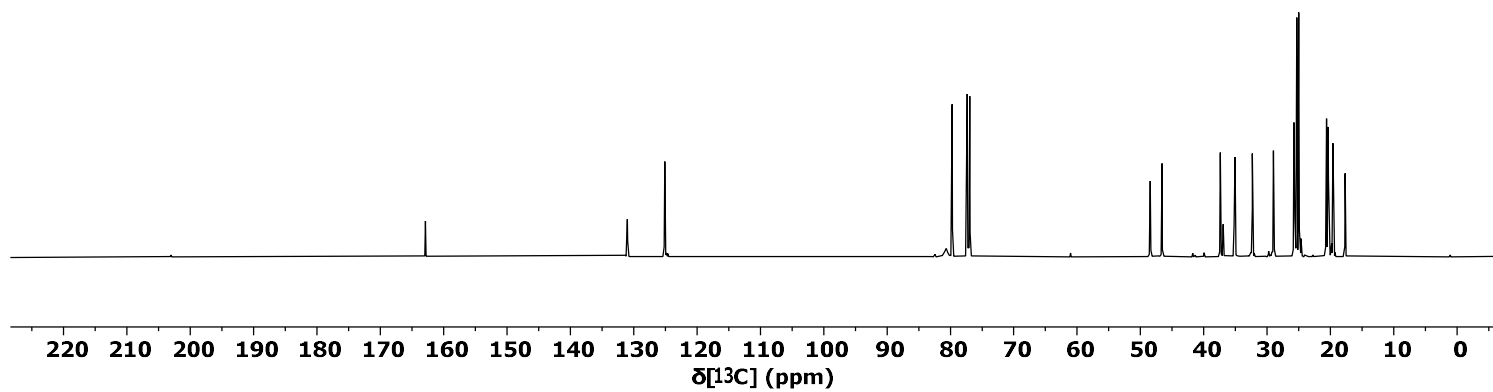

<sup>13</sup>C NMR (151 MHz, CDCl<sub>3</sub>)

|                   | major | major %    | minor | minor %    |
|-------------------|-------|------------|-------|------------|
|                   | 96.85 | 76%        | 30.96 | 24%        |
| S199              | 100   | 79%        | 27.28 | 21%        |
|                   | 95.91 | 77%        | 28.84 | 23%        |
| <b>average dr</b> |       | <b>77%</b> |       | <b>23%</b> |

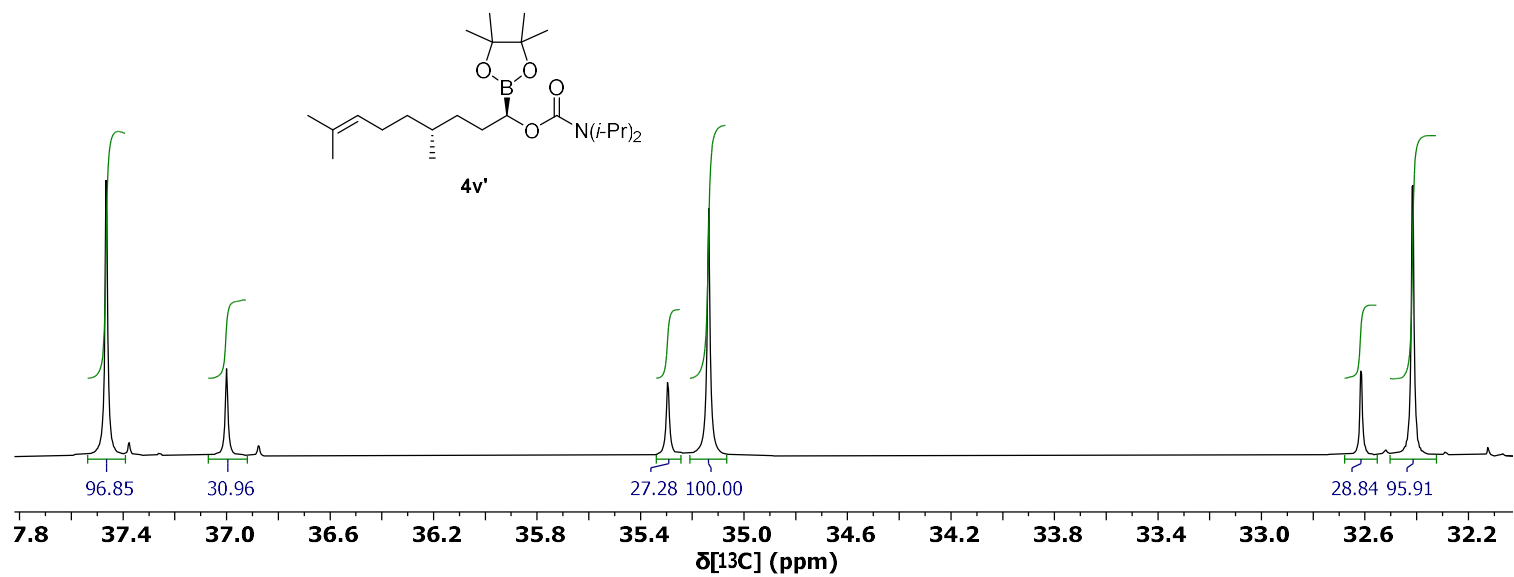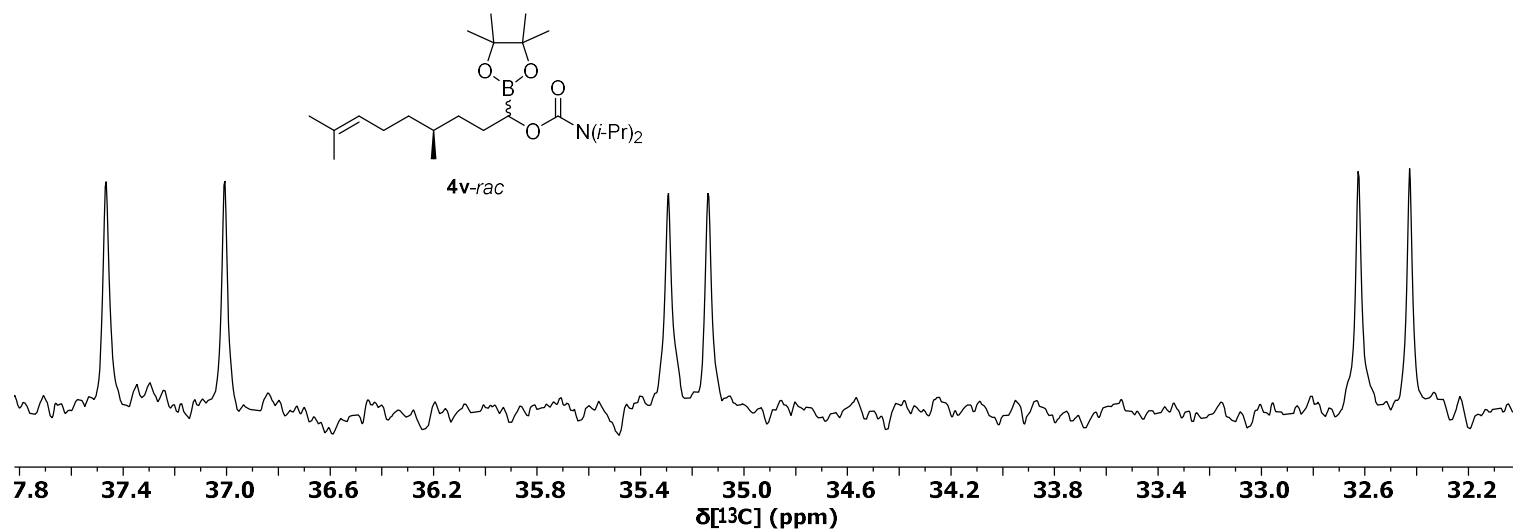

<sup>11</sup>B NMR (128 MHz, CDCl<sub>3</sub>)



—12.59

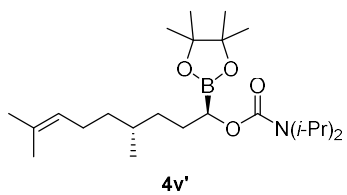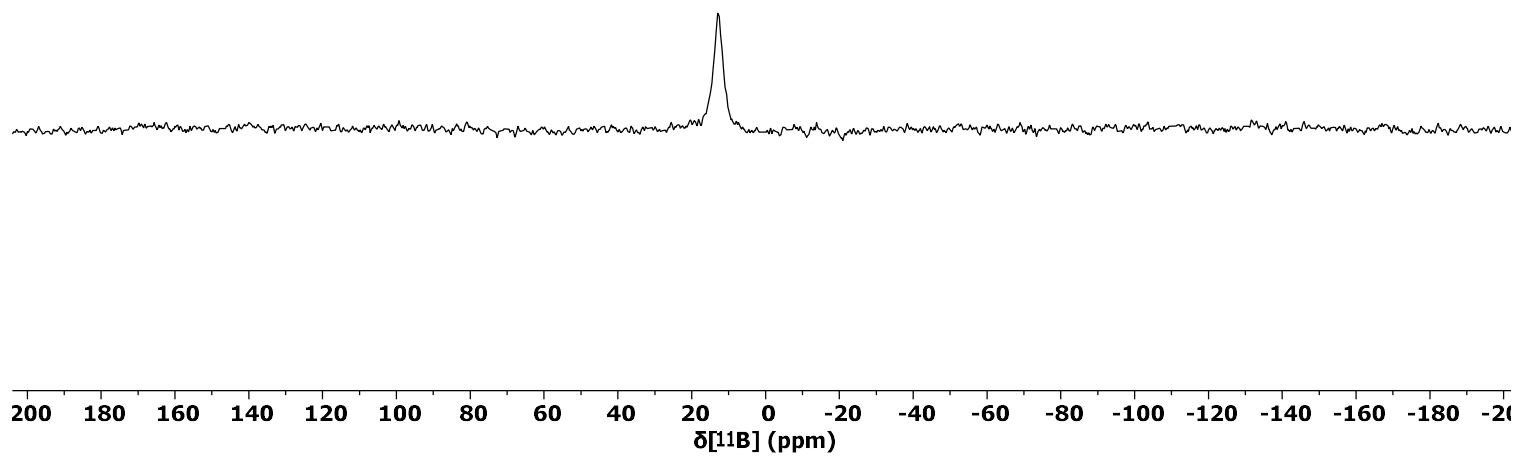

<sup>1</sup>H NMR (600 MHz, CDCl<sub>3</sub>)

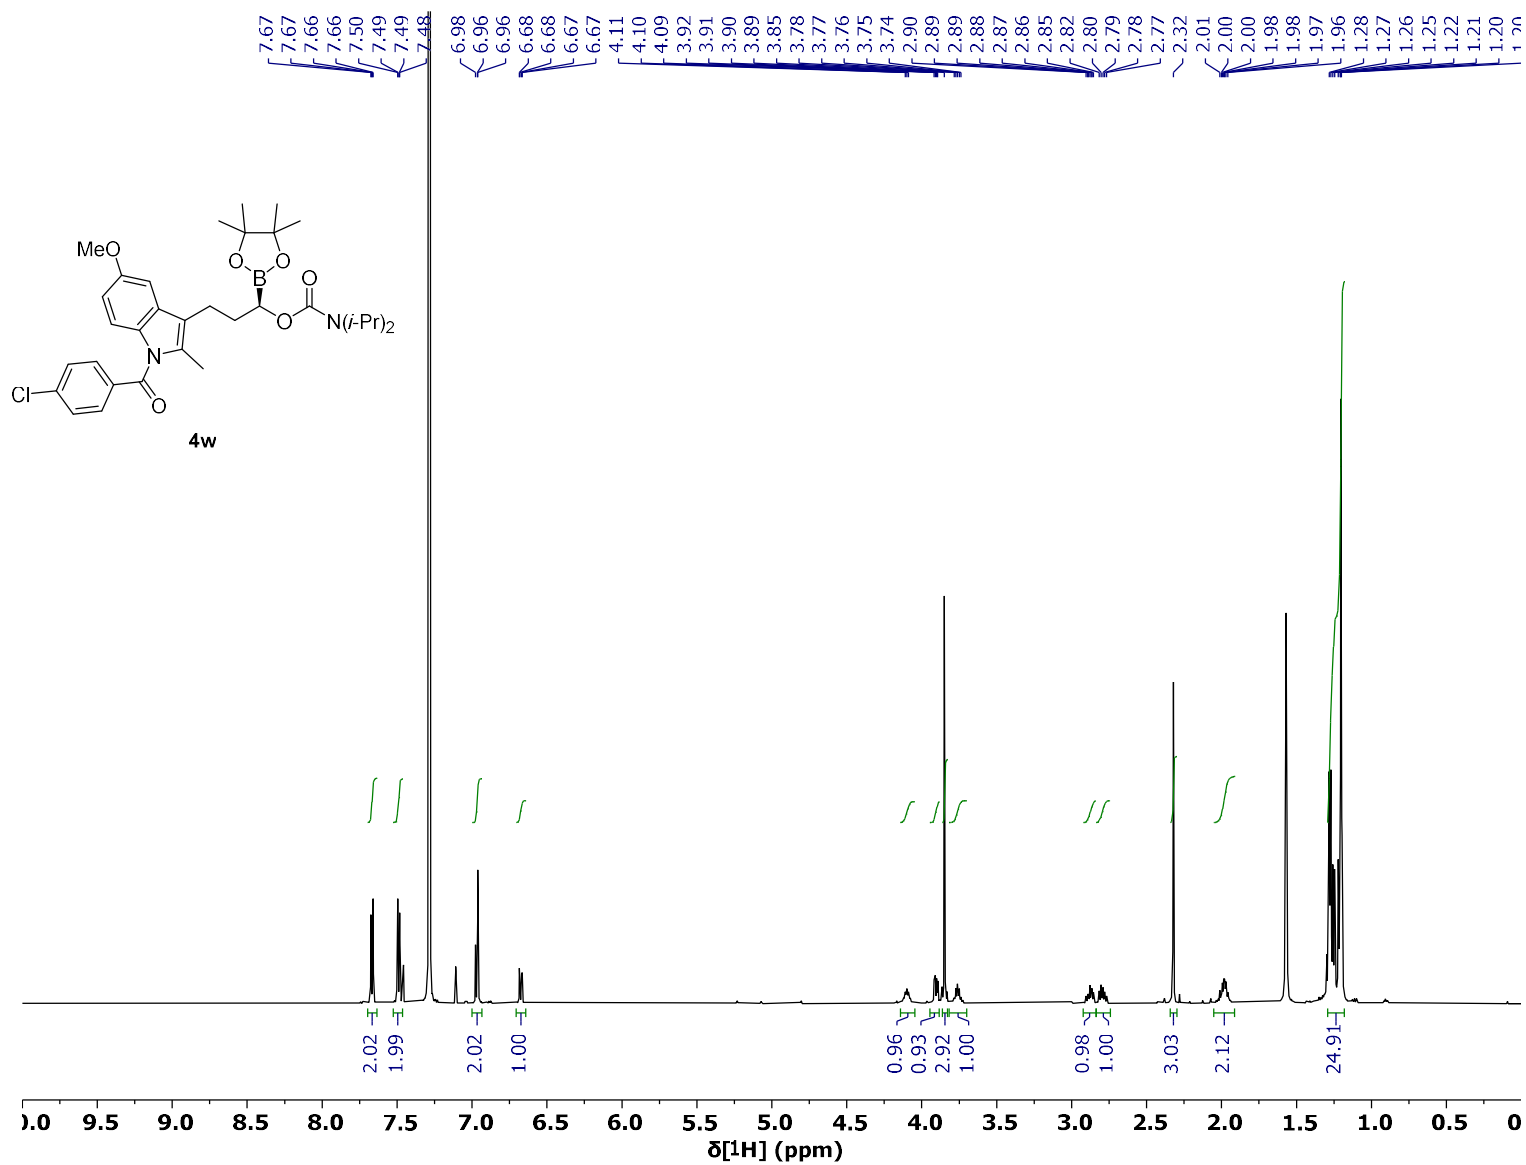

<sup>13</sup>C NMR (101 MHz, CDCl<sub>3</sub>)

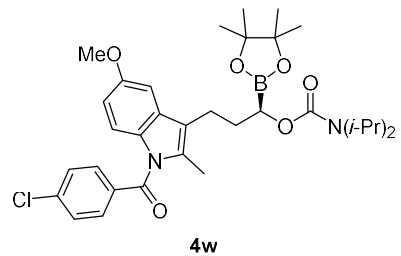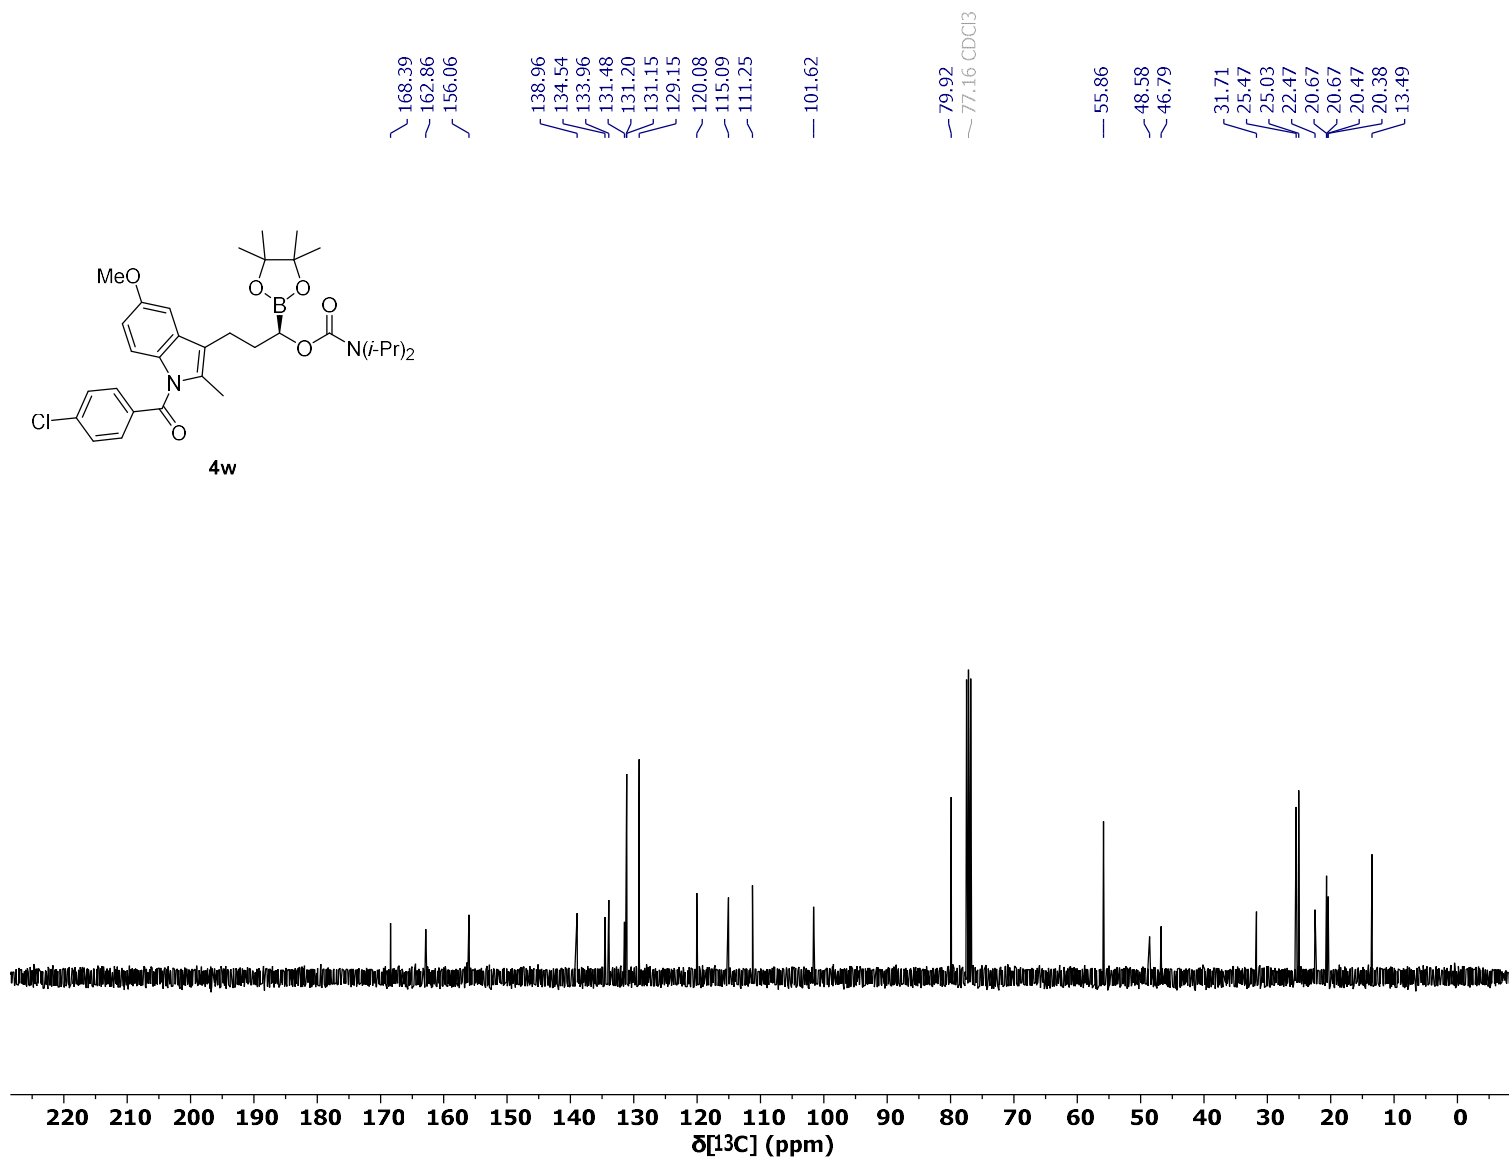

<sup>13</sup>C NMR (128 MHz, CDCl<sub>3</sub>)

—12.78

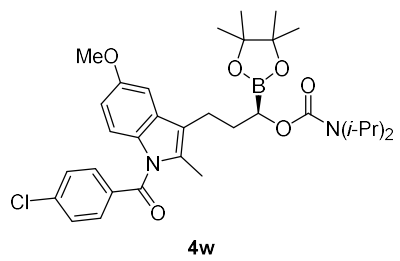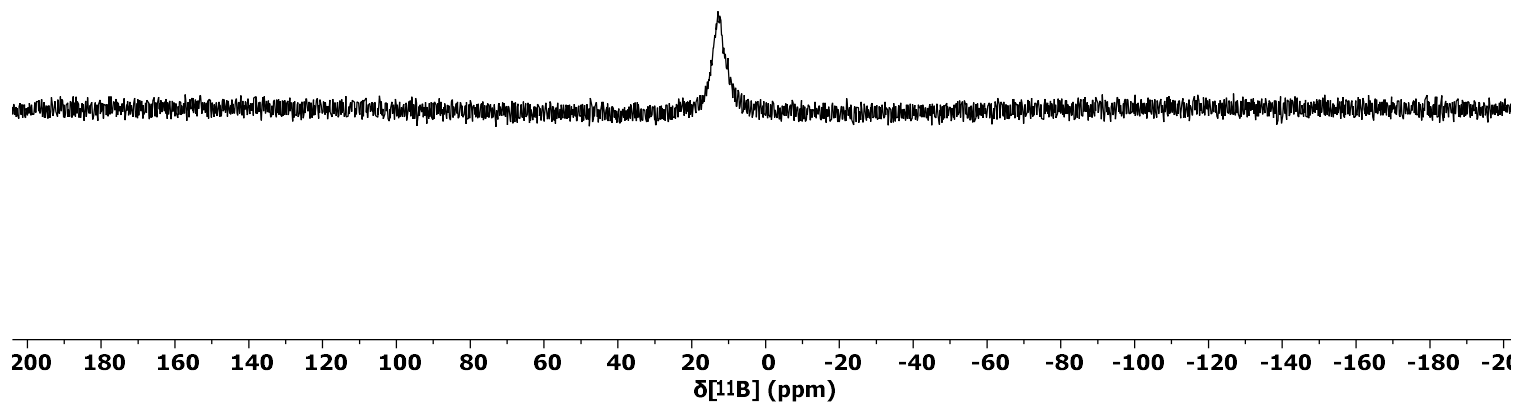

<sup>1</sup>H NMR (400 MHz, CDCl<sub>3</sub>)

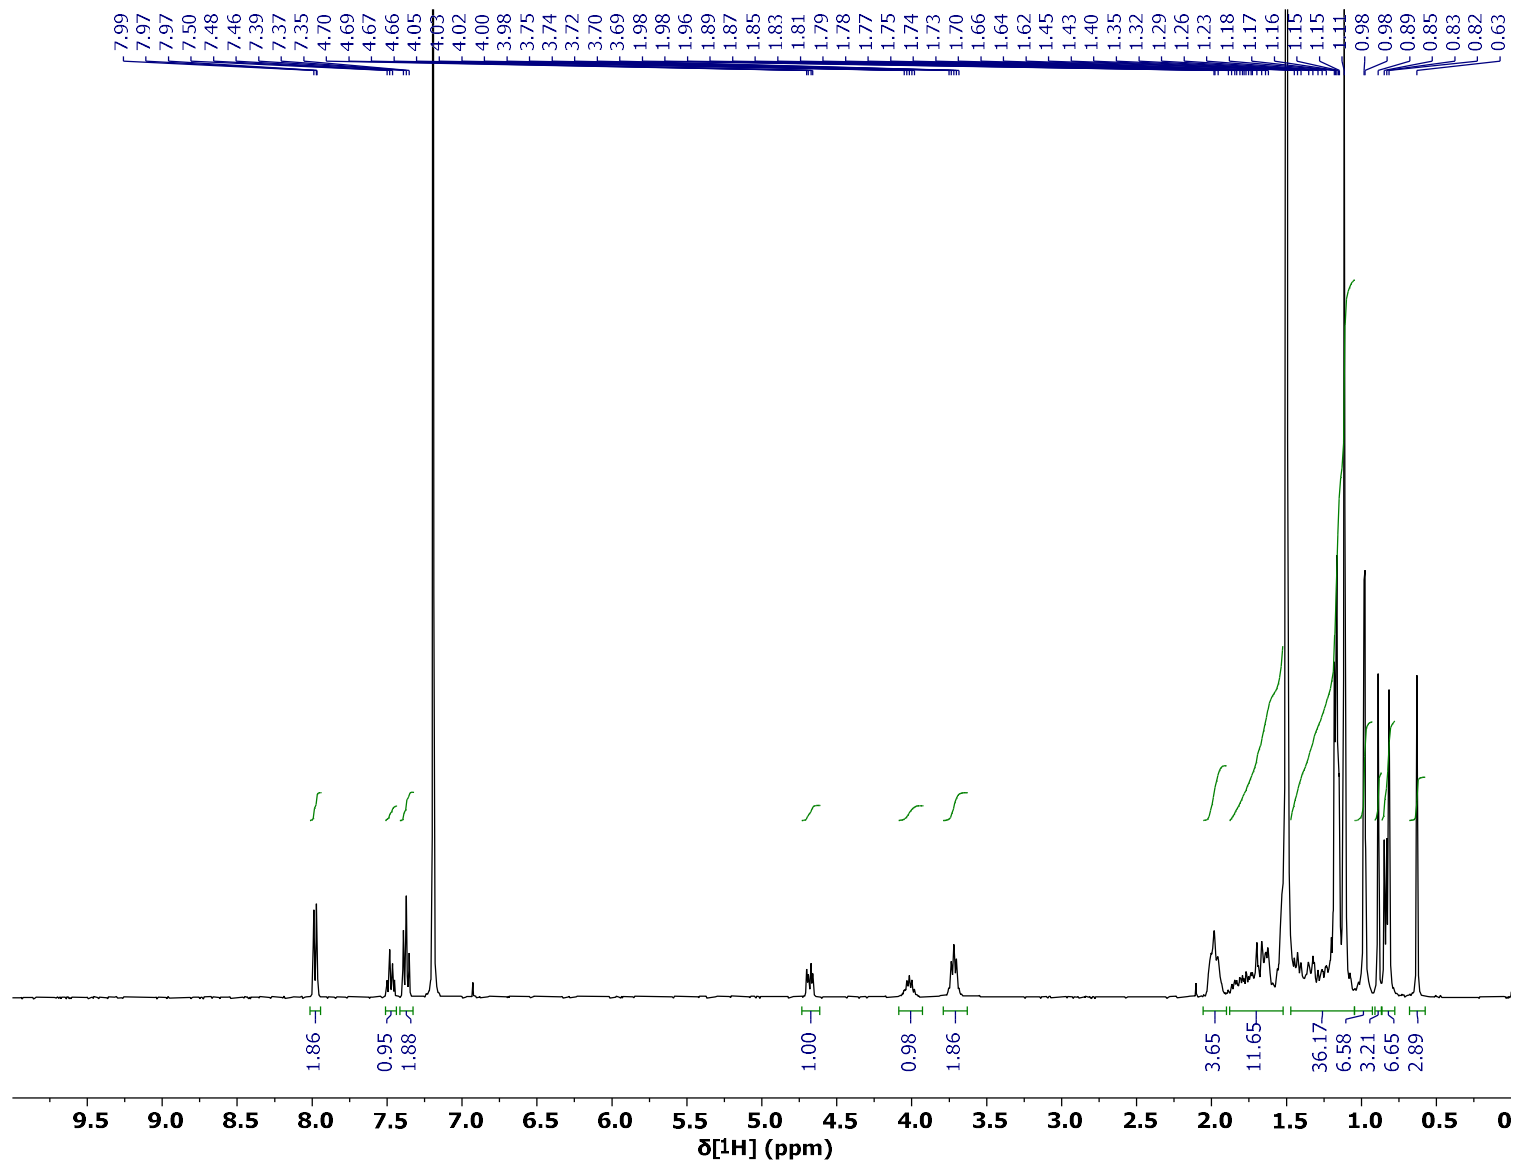

$^{13}\text{C}$  NMR (151 MHz,  $\text{CDCl}_3$ )

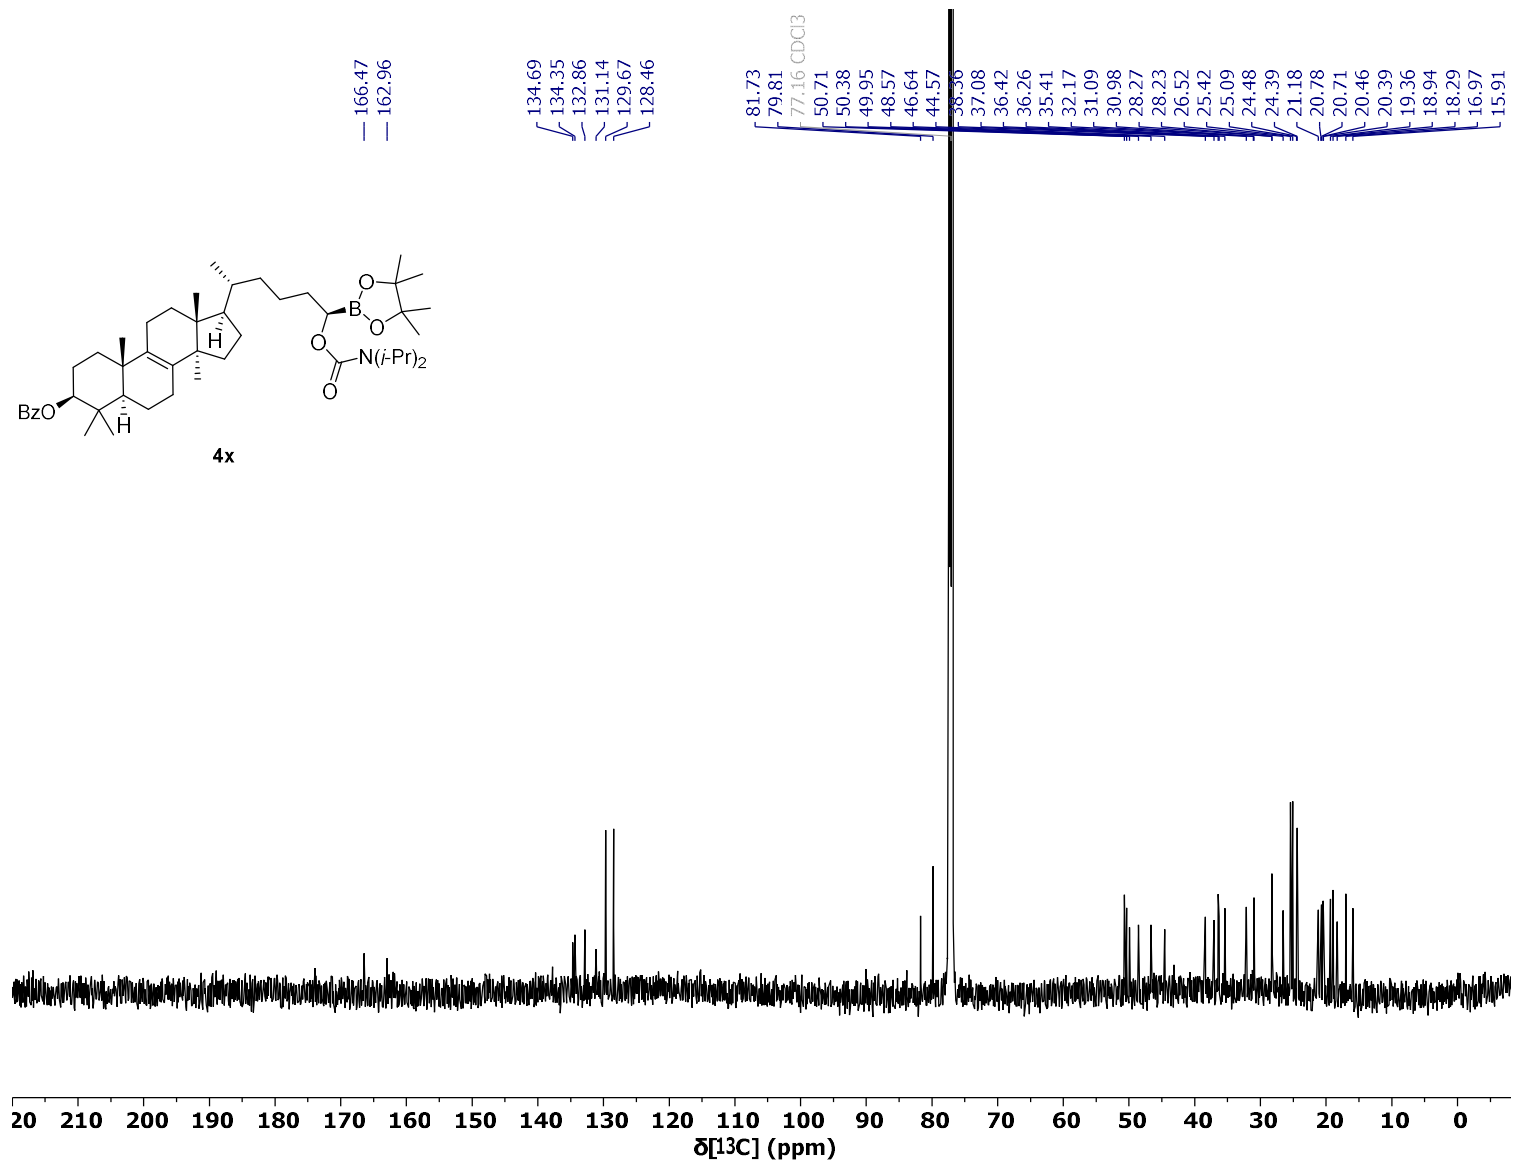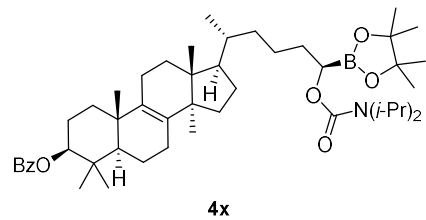

<sup>13</sup>C NMR (128 MHz, CDCl<sub>3</sub>)

— 13.25

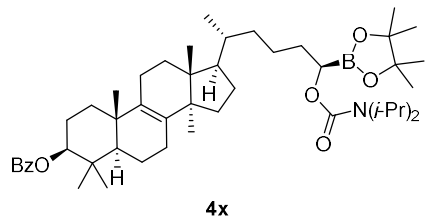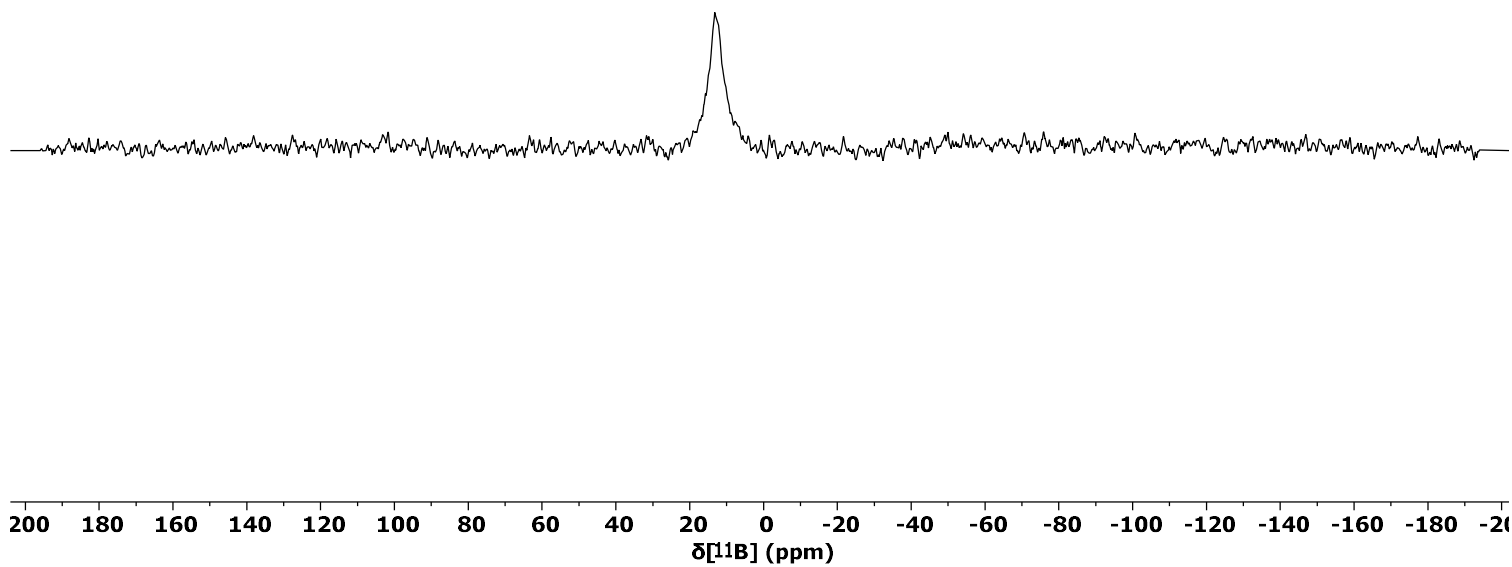

<sup>1</sup>H NMR (400 MHz, CDCl<sub>3</sub>)

7.26 CDCl<sub>3</sub>  
 7.13  
 7.13  
 7.12  
 7.11  
 6.84  
 6.83  
 6.82  
 6.82  
 3.79  
 3.38  
 3.37  
 3.36  
 2.78  
 2.76  
 2.75  
 2.61  
 2.61  
 2.59  
 1.82  
 1.81  
 1.79  
 1.78  
 1.78  
 1.78  
 1.77  
 1.77  
 1.76  
 1.75  
 1.74  
 1.74  
 1.74  
 1.73  
 1.73  
 1.72  
 1.72  
 1.70  
 1.68  
 1.68  
 1.67  
 1.67  
 1.66  
 1.66  
 1.65  
 1.65  
 1.64  
 1.64  
 1.64  
 1.34  
 1.25  
 1.25  
 1.25  
 1.24  
 1.23  
 1.22  
 1.22  
 1.21  
 1.21  
 1.20  
 1.17  
 1.16  
 1.13  
 1.10  
 1.07  
 1.06  
 1.04  
 1.03  
 1.01  
 0.98

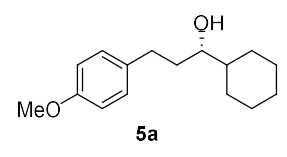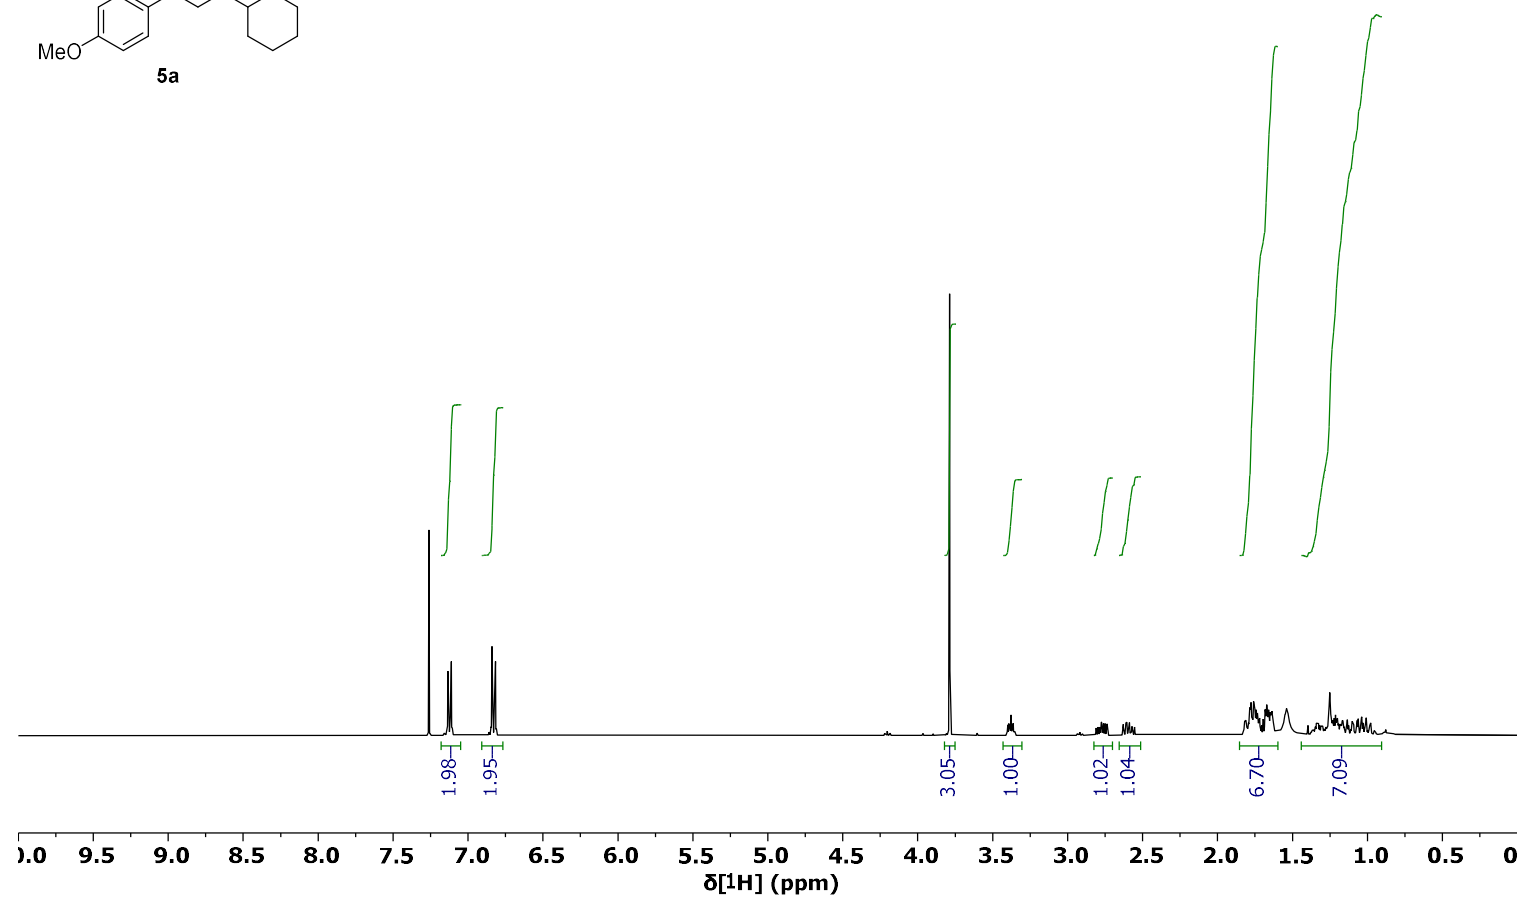

<sup>13</sup>C NMR (151 MHz, CDCl<sub>3</sub>)



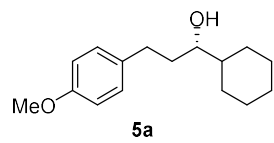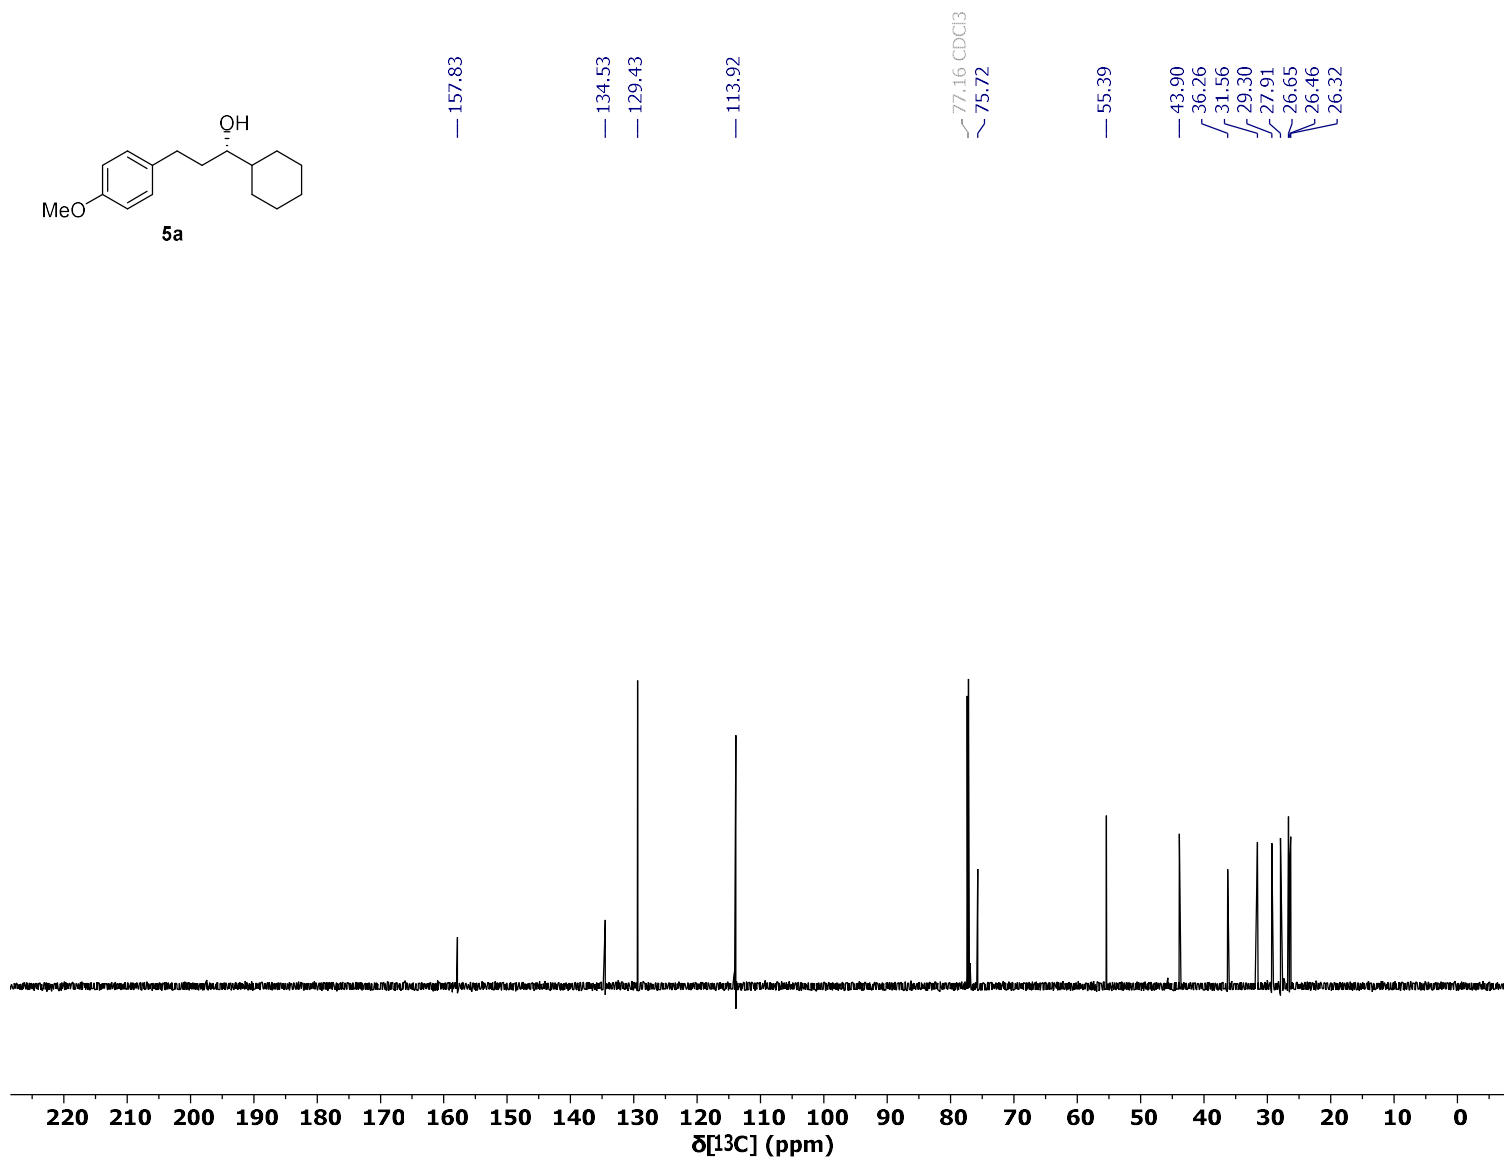

<sup>1</sup>H NMR (400 MHz, CDCl<sub>3</sub>)

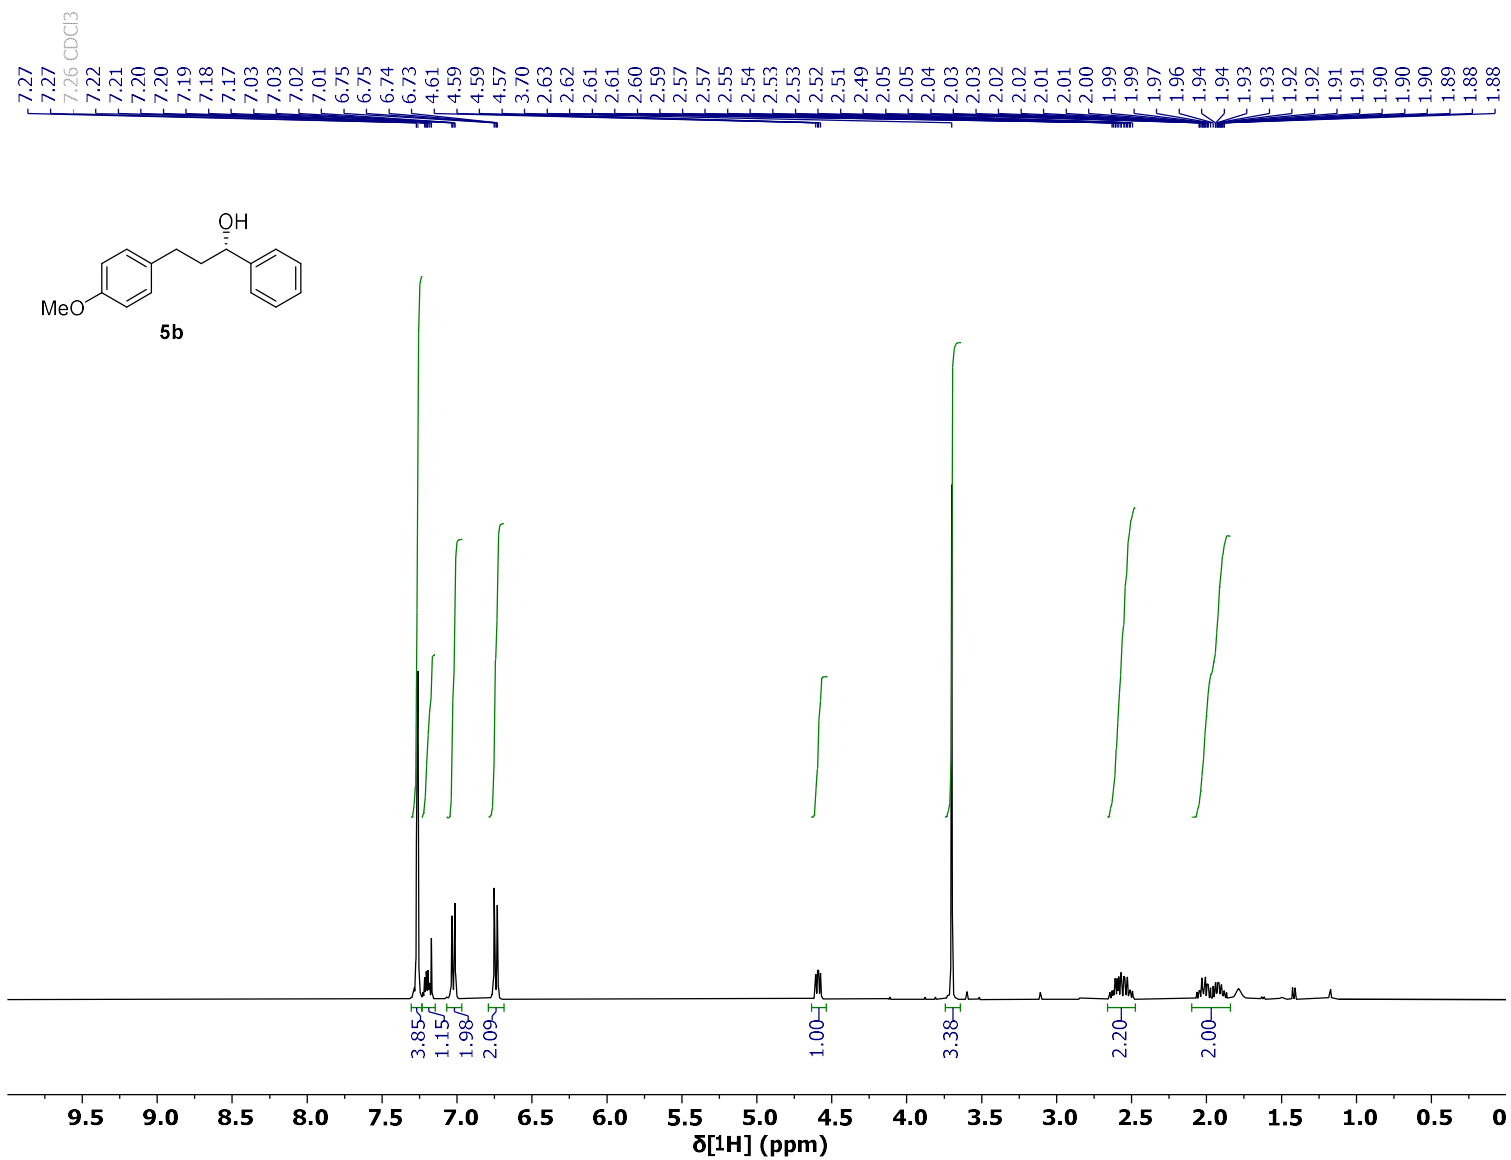

<sup>13</sup>C NMR (151 MHz, CDCl<sub>3</sub>)

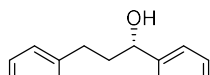

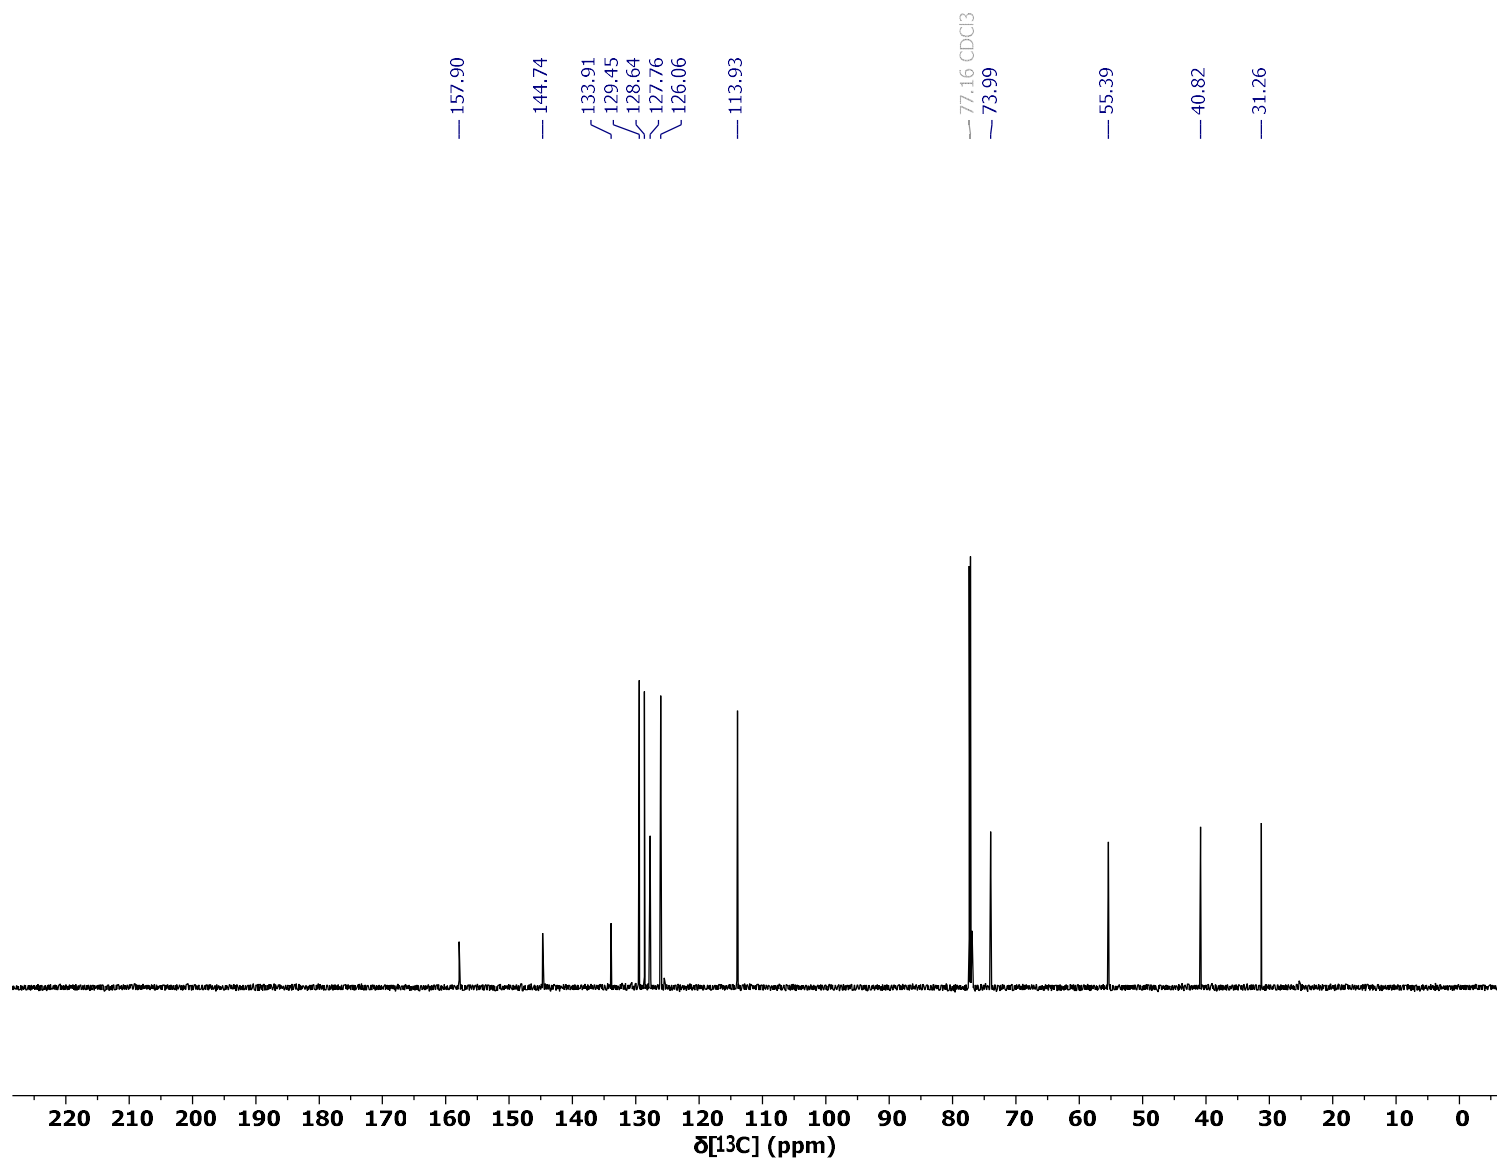

<sup>1</sup>H NMR (400 MHz, CDCl<sub>3</sub>)

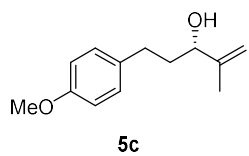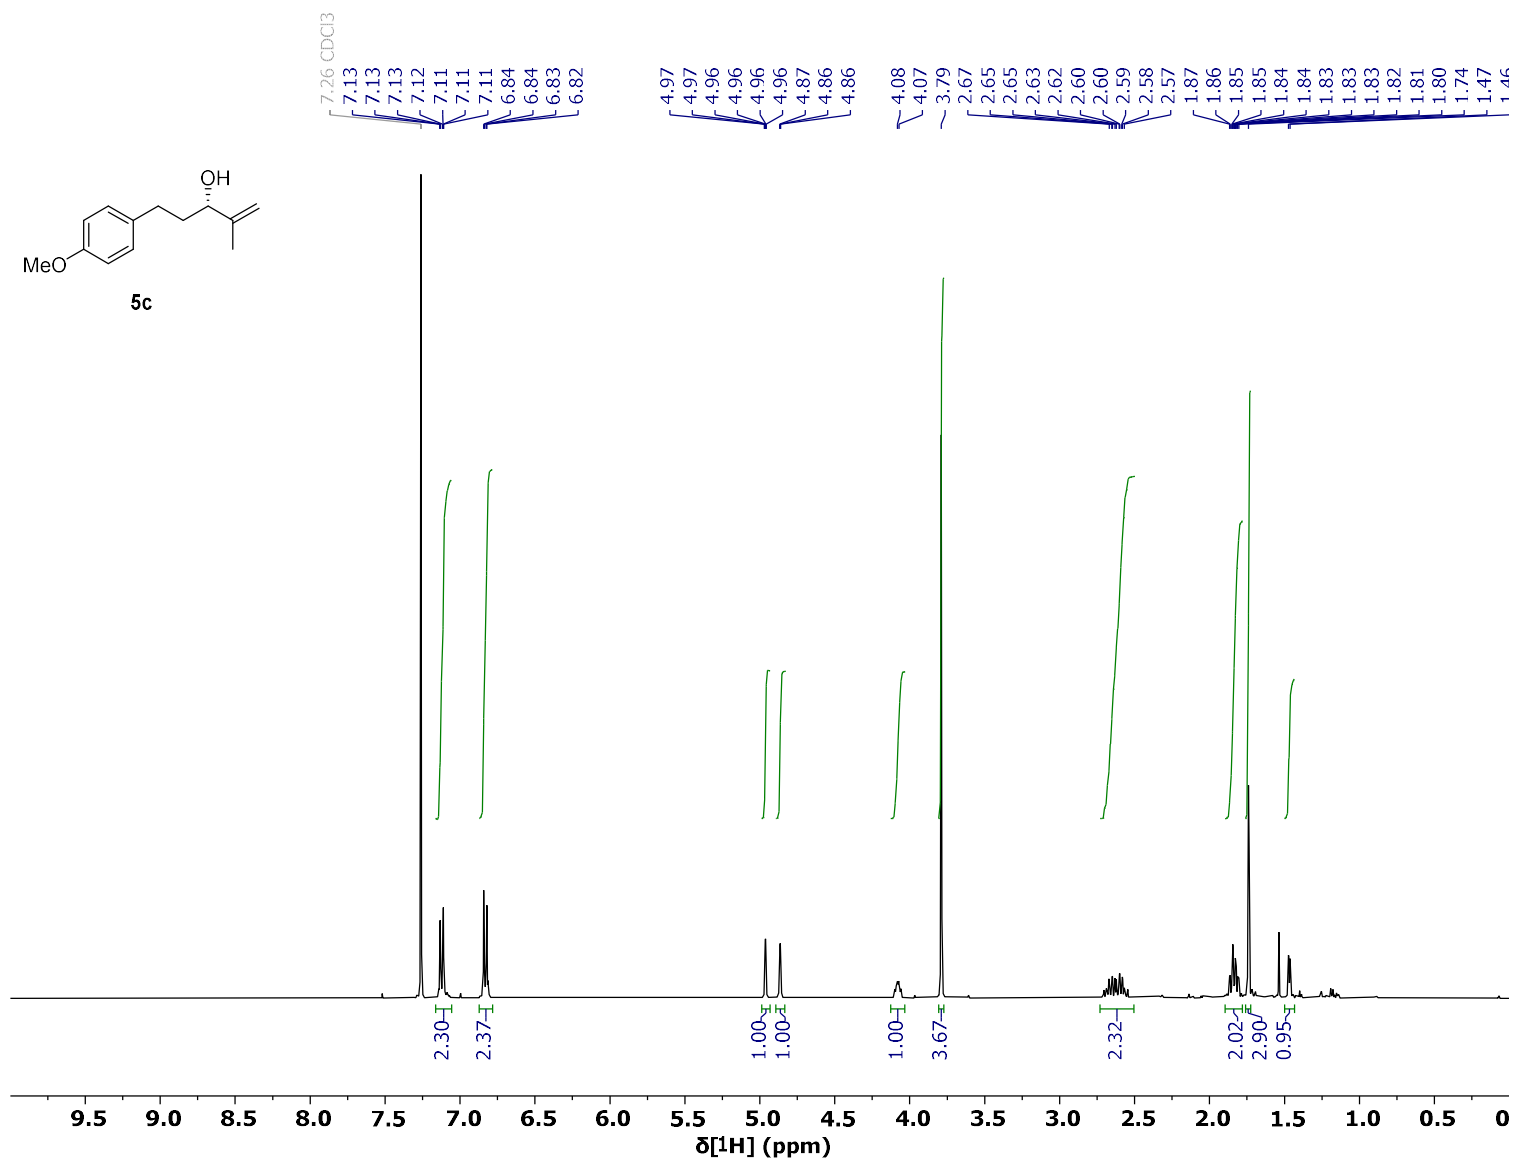

$^{13}\text{C}$  NMR (151 MHz,  $\text{CDCl}_3$ )

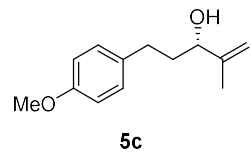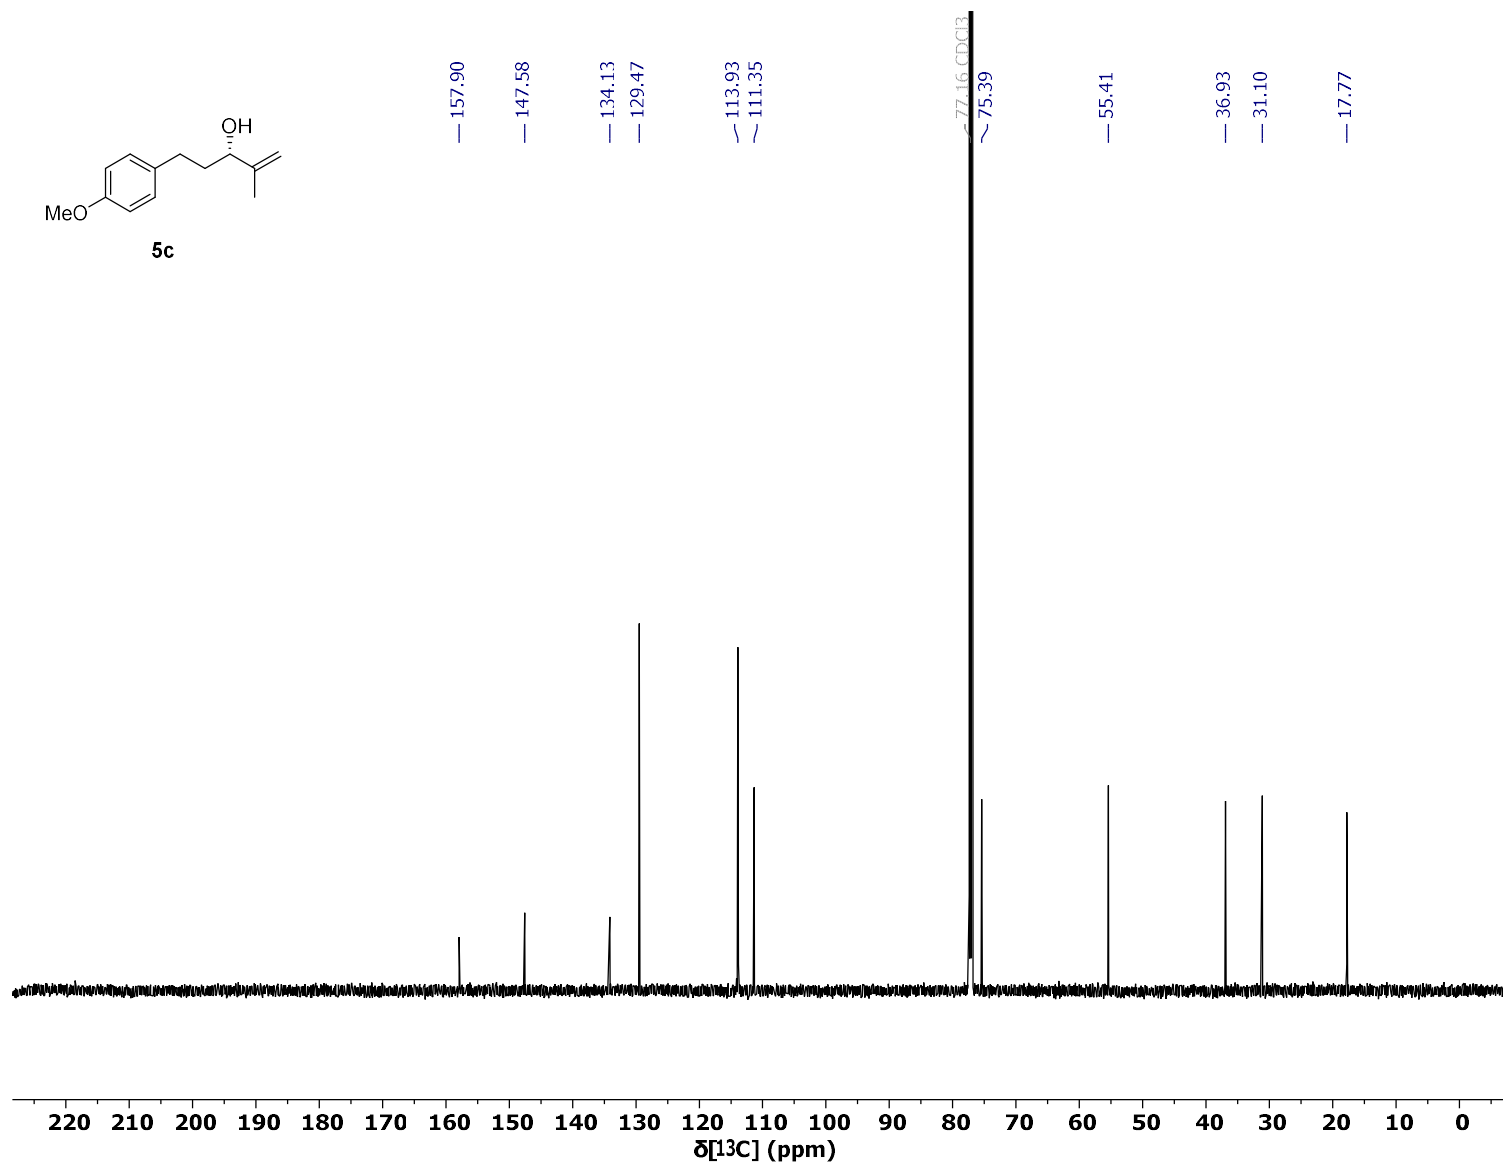

<sup>1</sup>H NMR (400 MHz, CDCl<sub>3</sub>)

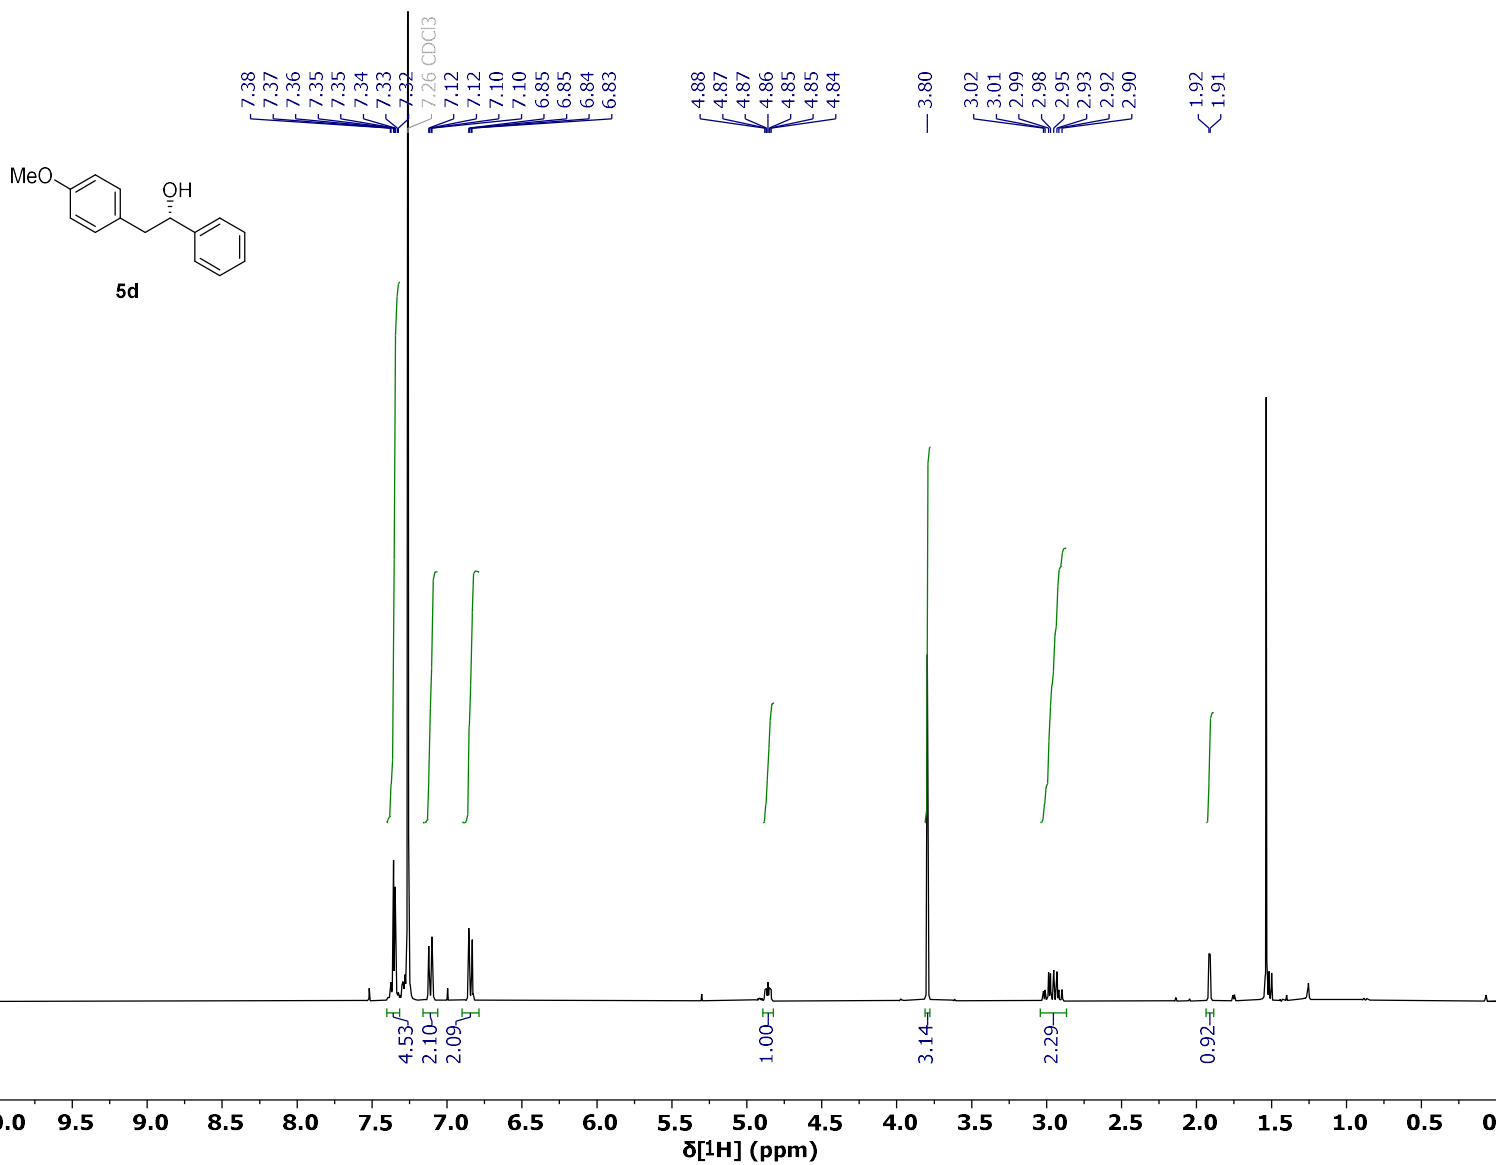

<sup>13</sup>C NMR (151 MHz, CDCl<sub>3</sub>)

S214

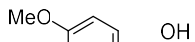

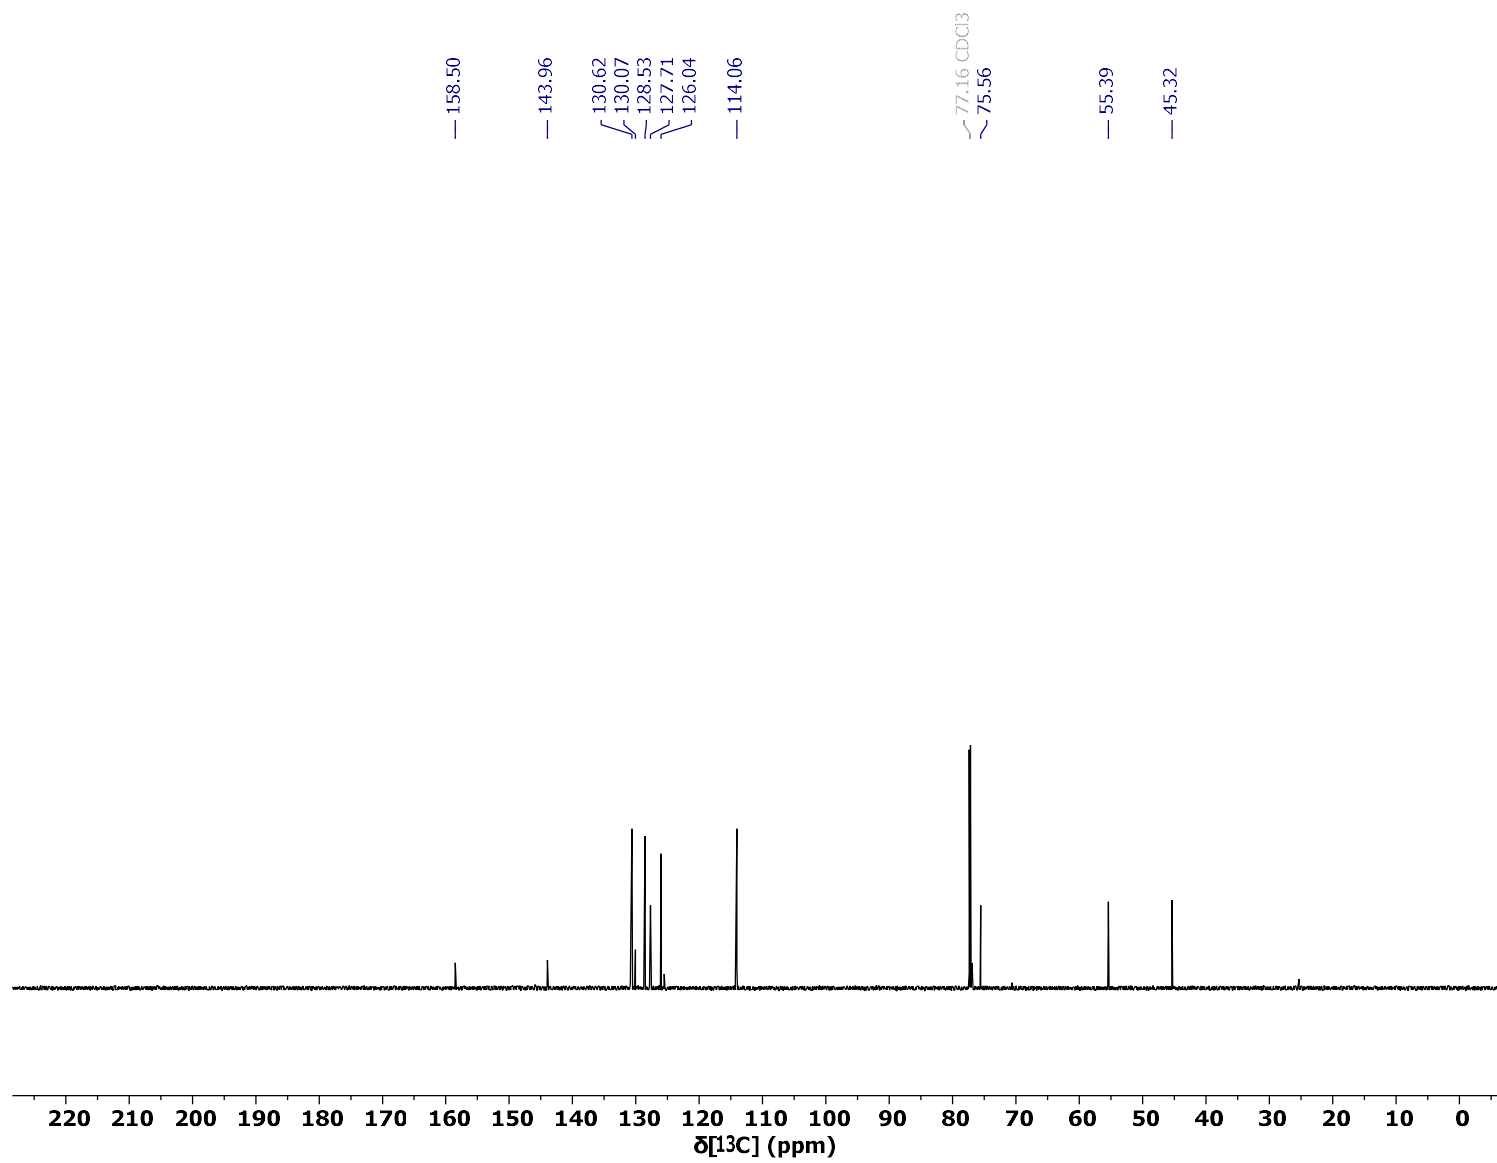

## References

---

- <sup>1</sup> Dugar, S.; Mahajan, D.; Hollinger Peter, F. Substituted methylformyl reagents and method of using same to modify physicochemical and/or pharmacokinetic properties of compounds. WO2012137225A1, 2012.
- <sup>2</sup> Aïssa, C. Improved Julia–Kocienski Conditions for the Methylenation of Aldehydes and Ketones. *J. Org. Chem.* **2006**, *71* (1), 360–363.
- <sup>3</sup> Ozanne, A.; Pouységu, L.; Depernet, D.; François, B.; Quideau, S. A Stabilized Formulation of IBX (SIBX) for Safe Oxidation Reactions Including a New Oxidative Demethylation of Phenolic Methyl Aryl Ethers. *Org. Lett.* **2003**, *5* (16), 2903–2906.
- <sup>4</sup> Miles-Barrett, D. M.; Neal, A. R.; Hand, C.; Montgomery, J. R. D.; Panovic, I.; Ojo, O. S.; Lancefield, C. S.; Cordes, D. B.; Slawin, A. M. Z.; Lebl, T.; Westwood, N. J. The Synthesis and Analysis of Lignin-Bound Hibbert Ketone Structures in Technical Lignins. *Org. Biomol. Chem.* **2016**, *14* (42), 10023–10030.
- <sup>5</sup> Hwang, S. K.; Lee, H. W.; Park, C. H. Preparation of azilsartan derivatives and intermediates. WO2020101450A1, 2020.
- <sup>6</sup> Mishra, C. B.; Manral, A.; Kumari, S.; Saini, V.; Tiwari, M. Design, Synthesis and Evaluation of Novel Indandione Derivatives as Multifunctional Agents with Cholinesterase Inhibition, Anti- $\beta$ -Amyloid Aggregation, Antioxidant and Neuroprotection Properties against Alzheimer's Disease. *Bioorg. Med. Chem.* **2016**, *24* (16), 3829–3841.
- <sup>7</sup> Vong, K.; Yamamoto, T.; Chang, T.; Tanaka, K. Bioorthogonal Release of Anticancer Drugs via Gold-Triggered 2-Alkynylbenzamide Cyclization. *Chem. Sci.* **2020**, *11* (40), 10928–10933.
- <sup>8</sup> Engelen, M.; Lombardi, A.; Vitale, R.; Lista, L.; Maglio, O.; Pavone, V.; Nastri, F. Branched Porphyrins as Functional Scaffolds for Multisite Bioconjugation: Branched Porphyrin Scaffolds. *Biotechnol. Appl. Biochem.* **2015**, *62* (3), 383–392.
- <sup>9</sup> Chavan, S. P.; Kadam, A. L.; Lasonkar, P. B.; Gonnade, R. G. Synthesis of 3-Azidopiperidine Skeleton Employing Ceric Ammonium Nitrate (CAN)-Mediated Regioselective Azidoalkoxylation of Enol Ether: Total Synthesis of D<sub>2</sub> Receptor Agonist ( $\pm$ )-Quinagolide. *Org. Lett.* **2018**, *20* (22), 7011–7014.
- <sup>10</sup> Nicolaou, K. C.; Cho, S. Y.; Hughes, R.; Winssinger, N.; Smethurst, C.; Labischinski, H.; Endermann, R. Solid- and Solution-Phase Synthesis of Vancomycin and Vancomycin Analogues with Activity against Vancomycin-Resistant Bacteria. *Chem. Eur. J.* **2001**, *7* (17), 3798–3823.
- <sup>11</sup> Shih, J.; Nguyen, T. S.; May, J. A. Organocatalyzed Asymmetric Conjugate Addition of Heteroaryl and Aryl Trifluoroborates: A Synthetic Strategy for Discoipyrrole D. *Angew. Chem. Int. Ed.* **2015**, *54* (34), 9931–9935.
- <sup>12</sup> Ito, T.; Hamaguchi, Y.; Tanabe, K.; Yamada, H.; Nishimoto, S. Transporting Excess Electrons along Potential Energy Gradients Provided by 2'-Deoxyuridine Derivatives in DNA. *Angew. Chem. Int. Ed.* **2012**, *51* (30), 7558–7561.
- <sup>13</sup> Keum, G.; Hwang, C. H.; Kang, S. B.; Kim, Y.; Lee, E. Stereoselective Syntheses of Rolliniastatin 1, Rollimembrin, and Membranacin. *J. Am. Chem. Soc.* **2005**, *127* (29), 10396–10399.



- 
- <sup>14</sup> Stevens, J. M.; MacMillan, D. W. C. Enantioselective  $\alpha$ -Alkenylation of Aldehydes with Boronic Acids via the Synergistic Combination of Copper(II) and Amine Catalysis. *J. Am. Chem. Soc.* **2013**, *135* (32), 11756–11759.
- <sup>15</sup> Qian, H.-D.; Li, Z.-H.; Deng, S.; Yao, C.; Xiang, H.-M.; Xu, G.; Geng, Z.-Q.; Wang, Z.; Chen, L.; Liu, C.; Zhu, C.; Qi, X.; Xu, H. Catalytic Asymmetric Vinylogous and Bisvinylogous Propargylic Substitution. *J. Am. Chem. Soc.* **2022**, *144* (34), 15779–15785.
- <sup>16</sup> Giroux, S.; Corey, E. J. An Efficient, Stereocontrolled Synthesis of the 25-(*R*)-Diastereomer of Dafachronic Acid A from  $\beta$ -Ergosterol. *Org. Lett.* **2008**, *10* (5), 801–802.
- <sup>17</sup> O’Keeffe, R.; Kenny, O.; Brunton, N. P.; Hossain, M. B.; Rai, D. K.; Jones, P. W.; O’Brien, N.; Maguire, A. R.; Collins, S. G. Synthesis of Novel 24-Amino-25,26,27-Trinorlanost-8-Enes: Cytotoxic and Apoptotic Potential in U937 Cells. *Bioorg. Med. Chem.* **2015**, *23* (9), 2270–2280.
- <sup>18</sup> Bai, X.-Y.; Zhao, W.; Sun, X.; Li, B.-J. Rhodium-Catalyzed Regiodivergent and Enantioselective Hydroboration of Enamides. *J. Am. Chem. Soc.* **2019**, *141* (50), 19870–19878.
- <sup>19</sup> Bagutski, V.; Ros, A.; Aggarwal, V. K. Improved Method for the Conversion of Pinacolboronic Esters into Trifluoroborate Salts: Facile Synthesis of Chiral Secondary and Tertiary Trifluoroborates. *Tetrahedron* **2009**, *65* (48), 9956–9960.
- <sup>20</sup> Sharma, H. A.; Essman, J. Z.; Jacobsen, E. N. Enantioselective Catalytic 1,2-Boronate Rearrangements. *Science* **2021**, *374* (6568), 752–757.
- <sup>21</sup> CrysAlisPro. Rigaku Oxford Diffraction, HyPix6000E System, CrysAlisPro Software System, 1.171.41.115a.
- <sup>22</sup> Sheldrick, G. M. *SHELXT* – Integrated Space-Group and Crystal-Structure Determination. *Acta Crystallogr., Sect. A: Found. Adv.* **2015**, *71* (1), 3–8.
- <sup>23</sup> Spek, A. L. *PLATON SQUEEZE*: A Tool for the Calculation of the Disordered Solvent Contribution to the Calculated Structure Factors. *Acta Crystallogr., Sect. C: Struct. Chem.* **2015**, *71* (1), 9–18.
- <sup>24</sup> Spek, A. L. Structure Validation in Chemical Crystallography. *Acta Crystallogr., Sect. D: Biol. Crystallogr.* **2009**, *65* (2), 148–155.
- <sup>25</sup> Dolomanov, O. V.; Bourhis, L. J.; Gildea, R. J.; Howard, J. A. K.; Puschmann, H. *OLEX2*: A Complete Structure Solution, Refinement and Analysis Program. *J. Appl. Crystallogr.* **2009**, *42* (2), 339–341.
- <sup>26</sup> Flack, H. D. On Enantiomorph-Polarity Estimation. *Acta Crystallogr., Sect. A: Found. Crystallogr.* **1983**, *39* (6), 876–881.
- <sup>27</sup> Hooft, R. W. W.; Straver, L. H.; Spek, A. L. Determination of Absolute Structure Using Bayesian Statistics on Bijvoet Differences. *J. Appl. Crystallogr.* **2008**, *41* (1), 96–103.
- <sup>28</sup>  $R_w(F^2) = \{\sum w(|F_o|^2 - |F_c|^2)^2 / \sum w(|F_o|^4)\}^{1/2}$ , where *w* is the weight given each reflection  
 $R(F) = \sum (|F_o| - |F_c|) / \sum |F_o|$  for reflections with  $F_o > 4(\sigma(F_o))$   
 $S = [\sum w(|F_o|^2 - |F_c|^2)^2 / (n - p)]^{1/2}$ , where *n* is the number of reflections and *p* is the number of refined parameters
- <sup>29</sup> International Tables for X-ray Crystallography, Vol. C, Tables 4.2.6.8 and 6.1.1.4; Wilson, A. J. C., ed.; Boston: Kluwer Academic Press, 1992.

---

<sup>30</sup> Sheldrick, G. M. SHELXTL/PC (Version 5.03). Siemens Analytical X-ray Instruments, Inc., Madison, Wisconsin, USA, 1994.

<sup>31</sup> Krasovskiy, A.; Knochel, P. Convenient Titration Method for Organometallic Zinc, Magnesium, and Lanthanide Reagents. *Synthesis* **2006**, *2006* (05), 0890–0891.

<sup>32</sup> Zhang, L.; Lovinger, G. J.; Edelstein, E. K.; Szymaniak, A. A.; Chierchia, M. P.; Morken, J. P. Catalytic Consecutive Cross-Coupling Enabled by Metal-Induced Metallate Rearrangement. *Science* **2016**, *351* (6268), 70–74.
